# Supplementary material for: Saline microalgae cultivation for the coproduction of biofuel and protein in the United States: an integrated assessment of costs, carbon, water, and land impacts
Source: Royal Society of Chemistry journal article supplement (doi:10.1039/d4se01423e), 2025-01-01
Supplement: d4se01423e1.pdf [file d4se01423e1.pdf]

1 *Supporting information*

2 Saline Microalgae Cultivation for the Coproduction of Biofuel and

3 Protein in the United States: An Integrated Assessment of Costs, Carbon,

4 Water, and Land Impacts

5 *Jingyi Zhang<sup>1</sup>, Yunhua Zhu<sup>2</sup>, Troy R. Hawkins<sup>1\*</sup>, Bruno C. Klein<sup>3</sup>, Andre M. Coleman<sup>2</sup>, Udayan*

6 *Singh<sup>1</sup>, Ryan Davis<sup>3</sup>, Longwen Ou<sup>1</sup>, Yiling Xu<sup>2</sup>, Saurajyoti Kar<sup>1</sup>, Matthew Wiatrowski<sup>3</sup>, Song Gao<sup>2</sup>,*

7 *and Peter Valdez<sup>2</sup>*

8 1 Argonne National Laboratory, 9700 South Cass Avenue, Lemont, IL 60439, United States.

9 Phone: (630)252-6428, Email: [thawkins@anl.gov](mailto:thawkins@anl.gov)

10 2 Pacific Northwest National Laboratory, 902 Battelle Blvd, Richland, WA 99352, United States

11 3 National Renewable Energy Laboratory, 15013 Denver West Parkway, Golden, CO 80401,

12 United States

13 **Contents**

14 1. System Description and Key Assumptions.....3

15 1.1 CO<sub>2</sub> Capture and Transport .....4

16 1.2 Algae Cultivation and Harvesting .....5

17 1.2.1 Forward osmosis and deep well injection.....6

18 1.3 Algae Conversion to Fuel and Protein Coproducts via HTL.....8

19 1.4 Potential bioproducts .....9

20 1.4.1 Replacement Ratios by Using Digestible Protein.....10

|    |       |                                                                                         |    |
|----|-------|-----------------------------------------------------------------------------------------|----|
| 21 | 2.    | Life cycle inventories (LCIs).....                                                      | 11 |
| 22 | 2.1   | LCIs of soybean PC .....                                                                | 11 |
| 23 | 2.2   | LCIs of whey PC .....                                                                   | 12 |
| 24 | 2.3   | LCIs of chicken meat products and microalgae protein-based meat alternative .....       | 14 |
| 25 | 2.3.1 | LCI of Chicken Meat .....                                                               | 14 |
| 26 | 2.3.2 | LCI of Microalgae Protein-Based Meat Alternatives .....                                 | 18 |
| 27 | 3.    | Water Scarcity Footprint and Correction Factor R.....                                   | 19 |
| 28 | 4.    | Direct Land Use Change and Indirect Land Use Change.....                                | 21 |
| 29 | 5.    | Nutrient and energy consumption comparison between saline algae and soybean cultivation |    |
| 30 |       | (per kg AFDW).....                                                                      | 23 |
| 31 | 6.    | Benchmarking MSP and GHG emissions with Other Studies.....                              | 24 |
| 32 | 7.    | Marginal Cost of GHG Avoidance .....                                                    | 25 |
| 33 | 8.    | GHG emissions from four different cases .....                                           | 26 |
| 34 | 9.    | Relationship Between Total Dissolved Solids (TDS) and minimum selling price and GHG     |    |
| 35 |       | Emissions .....                                                                         | 28 |
| 36 | 10.   | Spatially Explicit TDS, freshwater characterization factor, biomass productivity, and   |    |
| 37 |       | biomass yield .....                                                                     | 29 |
| 38 |       | References.....                                                                         | 31 |
| 39 |       |                                                                                         |    |
| 40 |       |                                                                                         |    |

41 1. System Description and Key Assumptions

42 In this section, the system is described in detail in the following subsections. Table S1

43 summarizes the primary parameters and assumptions.

44 **Table S1.** Summary of key parameters and assumptions

| Parameters                                                                              | Inputs/Assumptions                                                                               | References |
|-----------------------------------------------------------------------------------------|--------------------------------------------------------------------------------------------------|------------|
| <b>CO<sub>2</sub> capture and transport</b>                                             |                                                                                                  |            |
| Capture energy                                                                          | 0-1.06 MJ/kg CO <sub>2</sub> depending on source flue gas CO <sub>2</sub> concentration          | 1          |
| Compression energy                                                                      | 0.11 kWh/kg CO <sub>2</sub>                                                                      | 1          |
| <b>Algae cultivation and harvesting</b>                                                 |                                                                                                  |            |
| Individual pond size                                                                    | 10 acre                                                                                          | 2          |
| Individual algae farm size                                                              | 1,000 to 38,500 acre (varies by individual sites; 3,900 acres on average)                        | 2          |
| CO <sub>2</sub> utilization efficiency                                                  | 75%                                                                                              | 3          |
| Strain                                                                                  | High-protein <i>Tetraselmis striata</i>                                                          | 4          |
| Microfiltration + FO membrane power                                                     | 0.0055 kWh/L                                                                                     | 5          |
| Deep well injection power                                                               | 0.0012 kWh/L                                                                                     | 6          |
| Algae strain salinity tolerance                                                         | 55 g/L                                                                                           | 4          |
| Pond depth                                                                              | 20 cm                                                                                            | 7          |
| Harvested density                                                                       | 0.5 g ash free dry weight (AFDW)/L                                                               | 4          |
| Biomass concentration after dewatering for fuel only production                         | 20 wt% solids AFDW                                                                               | 2          |
| Biomass concentration after dewatering for protein concentrate (PC) and fuel production | 10 wt% solids AFDW                                                                               | 2          |
| Salinity target in biomass product (achieved via washing in final dewatering stage)     | 15 g/L                                                                                           | 2          |
| <b>Protein extraction and fuel conversion by HTL</b>                                    |                                                                                                  |            |
| Total fuel yield (diesel, sustainable aviation fuel (SAF), and naphtha)                 | 107 GGE/ metric ton AFDW for fuel only; 57 GGE/metric ton AFDW for fuel and protein coproduction | 2          |
| Diesel                                                                                  | 14 GGE/metric ton AFDW for fuel only; 10 GGE/metric ton AFDW for fuel and protein coproduction   | 2          |
| SAF                                                                                     | 64 GGE/metric ton AFDW for fuel only; 34 GGE/metric ton AFDW for fuel and protein coproduction   | 2          |
| Naphtha                                                                                 | 24 GGE/metric ton AFDW for fuel only; 13 GGE/metric ton AFDW for fuel and protein coproduction   | 2          |
| Protein product yield                                                                   | 0.34 metric ton/metric ton feedstock AFDW for fuel and protein coproduction                      | 2          |

45 1.1 CO<sub>2</sub> Capture and Transport

46 The energy required for upstream point source CO<sub>2</sub> capture is influenced by two key factors: the  
 47 CO<sub>2</sub> demand for microalgal cultivation, which varies by individual site, and the energy necessary  
 48 to capture and transport 1 kg of CO<sub>2</sub>, which depends on the CO<sub>2</sub> release concentration at the  
 49 local point source. The CO<sub>2</sub> demand is calculated based on the carbon content in biomass and  
 50 CO<sub>2</sub> utilization efficiency, with detailed calculations available below. The capture energy for 1  
 51 kg of CO<sub>2</sub> is derived from regression relationships between energy use and CO<sub>2</sub> concentrations  
 52 based on data from Carnegie Mellon University's Integrated Environmental Control Model under  
 53 a future technology scenario.<sup>1</sup> We consider various CO<sub>2</sub> sources for algae cultivation, and  
 54 calculated capture energy per kg of CO<sub>2</sub> with different sources can be found in Table S2. In  
 55 addition, a CO<sub>2</sub> compression energy of 0.11 kWh/kg CO<sub>2</sub> is added for all sources to achieve a  
 56 pressure of 137 bar suitable for high-pressure pipeline transport.

57

58 The CO<sub>2</sub> demand for microalgal cultivation is calculated by the equation below:

59 
$$D_{CO_2} = \frac{B \times W_{CBio}}{E_{CO_2} \times W_{CCO_2}} \quad \dots \text{Eq. S1}$$

60 where:

- 61  $D_{CO_2}$  = CO<sub>2</sub> demand (M ton/yr)
- 62  $B$  = Ash-free dry weight (AFDW) biomass (M ton/yr)
- 63  $W_{CBio}$  = Carbon fraction in biomass (0.48 – high protein algae, 0.55 - average)
- 64  $E_{CO_2}$  = CO<sub>2</sub> utilization efficiency (0.75)
- 65  $W_{CCO_2}$  = Carbon fraction in CO<sub>2</sub> (0.273).

66

67 **Table S2.** CO<sub>2</sub> capture cost and energy for current and future scenarios by source type.

| Source | CO <sub>2</sub> Concentration (%) | CO <sub>2</sub> Compression Energy (kWh/metric ton CO <sub>2</sub> ) | Cost of Capture (\$/metric ton CO <sub>2</sub> ) | CO <sub>2</sub> Capture Energy (MJ/kg CO <sub>2</sub> ) |
|--------|-----------------------------------|----------------------------------------------------------------------|--------------------------------------------------|---------------------------------------------------------|
|--------|-----------------------------------|----------------------------------------------------------------------|--------------------------------------------------|---------------------------------------------------------|

|                                        |      |                        | Current | Future | Current | Future |
|----------------------------------------|------|------------------------|---------|--------|---------|--------|
| Natural gas combined cycle             | 3.5  | Electrical energy: 107 | 76      | 50.92  | 3.51    | 1.06   |
| Pulverized coal                        | 12   |                        | 47      | 31.49  | 2.42    | 0.69   |
| Integrated gasification combined cycle | 40   |                        | 29      | 19.43  | 1.42    | 0.45   |
| Bioethanol                             | 99   |                        | 0       | 0      | 0.00    | 0.00   |
| Refining                               | 15   |                        | 43      | 28.81  | 1.39    | 0.64   |
| Hydrogen                               | 45   |                        | 28      | 18.76  | 1.39    | 0.43   |
| Ammonia                                | 45   |                        | 28      | 18.76  | 1.78    | 0.43   |
| Steel                                  | 22.5 |                        | 37      | 24.79  | 1.72    | 0.55   |
| Cement                                 | 25   |                        | 35      | 23.45  | 0.00    | 0.53   |
| Renewable natural gas processing       | 99   |                        | 0       | 0      | 0       | 0      |

68 \*Zero values artificially assigned for bioethanol and renewable natural gas; otherwise, values are  
69 sourced from <sup>8-10</sup>

70

## 71 1.2 Algae Cultivation and Harvesting

72 The algae biomass cultivation and harvesting system, which encompasses algae growth in open  
73 ponds, dewatering, and seasonal biomass storage, are shown in Figure S1. Inoculated biomass is  
74 cultivated in multiple 10-acre raceways to achieve a density of 0.5 g ash-free dry weight  
75 (AFDW)/L, using captured CO<sub>2</sub> along with added macro-nutrients urea and diammonium  
76 phosphate. Biomass is harvested at a rate that aligns with seasonal cultivation productivity,  
77 processing the biomass through settlers, membranes, and centrifuges for concentration from 0.05  
78 wt% to 20 wt% AFDW for the fuel-only case, and to 10 wt% for the fuel and PC coproduction  
79 case. Exogenous ash is partially removed in a basket filter, while salt content is reduced by a  
80 washing step utilizing freshwater from forward osmosis (FO) desalination unit. Paddlewheel  
81 circulation ceases overnight, as this consumes substantial electricity in the algae farm. Seasonal  
82 storage of the dewatered biomass occurs during peak cultivation times, predominantly in summer  
83 and, to a lesser extent, in spring and fall, varying by location. This storage strategy employs a

84 wet anaerobic method to minimize biomass degradation, thereby ensuring consistent throughput  
 85 capacity for subsequent conversion processes.

86 Groundwater with a salinity of 40,000 mg/L total dissolved solids (TDS) or less is delivered to  
 87 the cultivation ponds. The FO membrane unit is used to process the pond blowdown water,  
 88 which is the volume of water removed and replaced to regulate the salinity of the pond media  
 89 when it exceeds 55,000 mg/L, aligning with the strain's salinity tolerance (7). In addition, the FO  
 90 membrane unit is employed to provide a freshwater wash stream prior to the final dewatering  
 91 step to reduce salinity to 15,000 mg/L TDS for protein and fuel coproduction, safeguarding  
 92 downstream conversion equipment and mitigating protein quality concerns. The replacement  
 93 water comes from the freshwater fraction of the FO unit, while concentrate brine fraction from  
 94 the FO unit is disposed of via deep well injection. More details on the FO system are provided in  
 95 the Section 1.2.1 below.

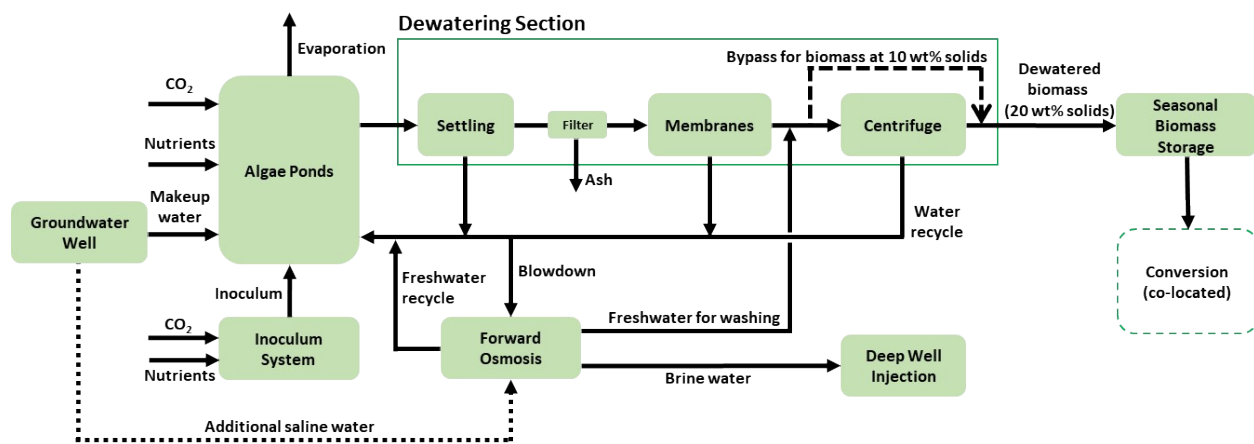

96 **Figure S1.** Flow diagram of algae biomass cultivation and harvesting

97 1.2.1 Forward osmosis and deep well injection

98 Desalination technologies are categorized into two types: thermal-based and membrane-based.

99 Thermal-based technologies require more energy compared to membrane-based technologies due  
 100

101 to the evaporation and condensation of water vapor. However, there are exceptions to this rule,  
102 such as membrane distillation and membrane crystallization technologies, which have relatively  
103 high specific energy consumption. In this study, the FO membrane desalination method is chosen  
104 due to its cost-effectiveness and lower energy consumption when compared to other brine  
105 treatment methods. Nevertheless, rigorous pretreatment is necessary to prevent scaling and  
106 fouling problems, and the FO membrane system may require energy-intensive draw solution  
107 regeneration.<sup>6</sup>

108 Desalination processes produce a significant amount of brine, and various brine disposal  
109 methods have been developed, including surface water discharge, sewer discharge, deep well  
110 injection (DWI), evaporation ponds, and land application. In this study, DWI is selected to  
111 dispose of saline water after the FO membrane system since it is inexpensive (\$0.54-2.65/m<sup>3</sup> of  
112 brine rejected) and has minimal impact on marine systems compared to surface water discharge.  
113 However, the DWI method requires an appropriate isolated aquifer structure, suitable  
114 geohydrology, and is not recommended for areas with high seismic activity. Sewer discharge  
115 method has been excluded in this study as it is rarely used in saline water desalination plants.  
116 Although evaporation ponds and land application do not affect marine systems, they are limited  
117 by weather conditions and irrigation needs and may pose a risk of soil and groundwater pollution.  
118 Evaporation ponds are only suitable for dry-weather areas, and land application is only  
119 recommended for small inland desalination plants due to seasonal irrigation needs and climate.<sup>6</sup>

120 In this study, it is assumed that blowdown undergoes pretreatment using microfiltration,  
121 followed by desalination using the FO membrane system. After treatment, approximately 82% of  
122 blowdown is recycled as freshwater, while the remaining concentrated saline water is disposed of  
123 by injecting it into deep wells. The throughput of an FO membrane system can vary based on

124 various factors such as the type of membrane, the properties of the feed and draw solutions,  
125 operating conditions, and specific applications. Here, the throughput, retention time, lifespan,  
126 and life cycle inventory (LCI) for the FO membrane system are obtained from a previous study  
127 and are summarized in Table S3.<sup>11</sup> The LCI of microfiltration production is omitted from the  
128 study for simplification purposes since electricity usage is the main contributor for  
129 microfiltration systems according to literature.<sup>12</sup>

130 **Table S3.** Specification of the FO membrane system

| Specification           | Quantity | Units                        |
|-------------------------|----------|------------------------------|
| Throughput              | 7        | L/m <sup>2</sup> FO membrane |
| Retention time          | 1        | day                          |
| Lifespan of FO membrane | 5        | years                        |

131

### 132 1.3 Algae Conversion to Fuel and Protein Coproducts via HTL

133 This study investigates two downstream processing cases as shown in Figure S2: a fuel-only case  
134 and a fuel and protein coproduction case. The fuel-only case routes the algae slurry at 20 wt%  
135 solids content directly to HTL, producing biocrude, solids, aqueous, and gas outputs. For the  
136 fuel-only case, the biocrude is upgraded by hydrotreating and hydrocracking to produce diesel  
137 (17 wt%), sustainable aviation fuel (SAF) (60 wt%), and naphtha (23 wt%). The solid phase  
138 undergoes acid digestion for phosphorus recovery. The aqueous phase is recycled back to the  
139 algae farm directly from the HTL process. The HTL off-gas is used for heating and hydrogen  
140 generation. In the fuel and protein coproduction case, algal slurry at 10 wt% solids content  
141 undergoes high-pressure homogenization (HPH) and pH shift for protein extraction.<sup>13</sup> The  
142 protein-extracted algae are then sent to the HTL process, where the outputs are similarly  
143 processed as the fuel-only case, with aqueous outputs routed to an anaerobic digester to produce  
144 biogas for process heating. More detailed descriptions can be found in our previous study.<sup>2</sup>



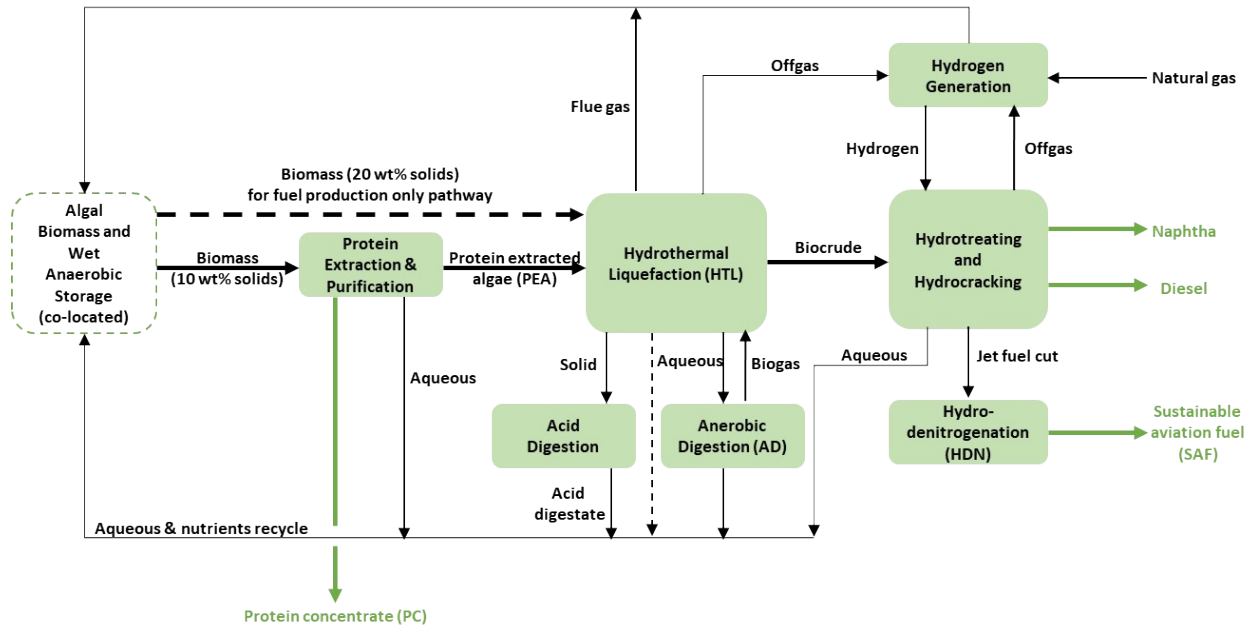

145

146 **Figure S2.** Flow diagram of saline microalgae protein extraction and HTL fuel conversion.

#### 147 1.4 Potential bioproducts

148 In the three fuel and PC coproduction cases, it is assumed that the protein coproduct either

149 directly substitutes for soybean and whey PC or is further processed to replace chicken meat. The

150 selling prices (SPs) and market sizes for soybean PC, whey PC, and chicken meat are

151 summarized in Table S4. The detailed processing procedure from PC to chicken meat

152 alternatives (CMAs) can be found in Section 2.3.2 of the SI. Digestible protein is selected as the

153 basis for estimating the replacement ratio of algae PC to substitute the three protein targets.

154 Specifically, digestible protein is determined by multiplying the protein content by its

155 digestibility coefficient. The detailed information about replacement ratios is Section 1.4.1 in the

156 SI.

157 **Table S4.** SPs and market sizes associated with microalgae PC replacement targets

|                       | Soybean PC* | Whey PC | Chicken meat |
|-----------------------|-------------|---------|--------------|
| Price (\$/kg product) | 1.3         | 3.7     | 1.6          |
| Price (\$/kg protein) | 2.0         | 6.1     | 5.0          |

|                                                                  |        |        |        |
|------------------------------------------------------------------|--------|--------|--------|
| References                                                       | 14     | 14, 15 | 16     |
| 2030 forecast global market size (million metric ton [MMT]/year) | 13     | 3.5    | 175    |
| References                                                       | 14, 17 | 18, 19 | 20, 21 |

158 \*Soybean PC market size is based on protein ingredient market size.

#### 159 1.4.1 Replacement Ratios by Using Digestible Protein

160 The functional unit for the protein coproduct and the target protein products is defined as 1 kg of  
161 digestible protein. The replacement ratios for the target protein products are calculated by  
162 dividing the digestible protein content of microalgae PC by the digestible protein content of the  
163 target protein products. Table S5 summarizes these replacement ratios, using digestible protein  
164 as the consistent functional unit.

165 **Table S5.** Replacement ratios<sup>a</sup> by using digestible protein as the matching functional unit

|                                               | Coproduct targets used in this study |            |                   | Potential products from this study |                                                         |
|-----------------------------------------------|--------------------------------------|------------|-------------------|------------------------------------|---------------------------------------------------------|
|                                               | Soybean PC                           | Whey PC 60 | Chicken meat      | Microalgae PC                      | Microalgae-based chicken meat alternatives <sup>b</sup> |
| Protein content                               | 62%-65%                              | 60%        | 32%               | 72%                                | 28%                                                     |
| Protein digestibility                         | 95-98%                               | 100%       | 100%              | 55%-80%                            | 55%-80%                                                 |
| Replacement ratio by using digestible protein | 85%                                  | 84%        | 196% <sup>b</sup> |                                    |                                                         |
| References                                    | 22, 23                               | 22         | 24                | 25-28                              | 29                                                      |

166 <sup>a</sup>Replacement ratio = (microalgal PC protein content × microalgal protein digestibility)/(target protein content × target protein  
167 digestibility)

168 <sup>b</sup>1 unit of microalgae contains 72% protein. The meat alternative consists of 30% dried microalgae PC, 10% dried soybean PC,  
169 and 60% water. The protein that can be provided by 1 unit microalgae PC to meat alternative can be calculated by:  
170  $1 \times 72\% + (10\%/30\%) \times 62\% = 0.93$  unit of protein. The replacement ratio for chicken meat is estimated based on  
171  $0.93 \times \text{avg}(55\%, 80\%) / (0.32 \times 100\%) = 196\%$ .

## 172 2. Life cycle inventories (LCIs)

173 The LCIs for fuel-only and fuel and PC coproduction cases in site 1670 which has median GHG  
174 emissions can be found in the Table S6. The LCIs for the protein coproduct replacement  
175 targets—soybean PC, whey PC, and chicken meat—are detailed in sections 2.1, 2.2, and 2.3.1,

176 respectively. The processing of algal protein coproduct into chicken meat alternative is discussed  
 177 in section 2.3.2.

178 Table S6. LCI of the system with median GHG emissions

| Item                                                                              | Units                  | Fuel +<br>PC | Fuel<br>only |
|-----------------------------------------------------------------------------------|------------------------|--------------|--------------|
| <b>CO<sub>2</sub> capture, transport, and compression (per kg CO<sub>2</sub>)</b> |                        |              |              |
| Capture                                                                           | MJ/kg CO <sub>2</sub>  | 1.1          | 1.1          |
| Transport                                                                         | kWh/kg CO <sub>2</sub> | 0.11         | 0.11         |
| <b>Algae growth (per kg AFDW, with recycling)</b>                                 |                        |              |              |
| <b>Resource consumption</b>                                                       |                        |              |              |
| Electricity                                                                       | kg /kg AFDW            | 0.60         | 0.61         |
| CO <sub>2</sub>                                                                   | kg/kg AFDW             | 1.6          | 1.4          |
| Urea                                                                              | kg/kg AFDW             | 0.056        | 0.020        |
| (NH <sub>4</sub> ) <sub>2</sub> HPO <sub>4</sub>                                  | kg/kg AFDW             | 0.0095       | 0.011        |
| FO membrane                                                                       | kg/kg AFDW             | 0.0067       | 0.0066       |
| <b>Output</b>                                                                     |                        |              |              |
| Fresh Water in Biomass                                                            | kg/kg AFDW             | 9.0          | 4.0          |
| Saline water blowdown                                                             | kg/kg AFDW             | 228          | 223          |
| <b>Conversion</b>                                                                 |                        |              |              |
| <b>Biomass inputs</b>                                                             |                        |              |              |
| Algae biomass                                                                     | kg AFDW/MJ             | 0.14         | 0.076        |
| <b>Energy inputs</b>                                                              |                        |              |              |
| Electricity Demand                                                                | kWh/MJ                 | 0.092        | 0.0060       |
| Natural Gas (Utility)                                                             | MJ/MJ                  | 0.20         | 0.13         |
| Natural Gas (H <sub>2</sub> Production)                                           | MJ/MJ                  | 0.15         | 0.21         |
| <b>Chemical and water demand</b>                                                  |                        |              |              |
| Sulfuric Acid                                                                     | kg/MJ                  | 0.0014       | 0.0021       |
| HT Catalyst (HTL)                                                                 | kg/MJ                  | 1.7E-05      | 1.8E-05      |
| Hydrocracking catalyst (HTL)                                                      | kg/MJ                  | 3.0E-07      | 3.0E-07      |
| Membrane Flocculant                                                               | kg/MJ                  | 0.0016       | 0            |
| NaOH                                                                              | kg/MJ                  | 5.5E-05      | 2.3E-05      |
| Water (Process demands)                                                           | gal/MJ                 | 0.036        | 0.017        |
| HCl                                                                               | kg/MJ                  | 1.1E-05      | 0            |
| <b>Output</b>                                                                     |                        |              |              |
| Renewable Diesel                                                                  | MJ/MJ                  | 0.17         | 0.18         |
| Naphtha                                                                           | MJ/MJ                  | 0.22         | 0.23         |
| SAF                                                                               | MJ/MJ                  | 0.60         | 0.60         |
| Protein coproduct                                                                 | kg/MJ                  | 0.050        | 0            |

179

180 2.1 LCIs of soybean PC

181 The soybean PC is extracted from soybean. Soybean PC is the main product from soybean  
 182 concentration and multiple co-products soybean hulls, soybean crude oil, and soybean molasses  
 183 are generated in the production process. To assess the environmental impacts associated with  
 184 soybean PC production, allocation methods have been utilized. However, it is important to note  
 185 that these allocation methods can introduce uncertainties even if it is the main product. To  
 186 address this, both mass and economic value allocation methods are employed to estimate  
 187 environmental impacts.

188 The LCI of soybean (13% water) farming, harvesting, and transportation to soybean PC  
 189 production plant is obtained from GREET model. The LCI of soybean PC extraction from  
 190 soybean (13% water) is obtained from literature,<sup>23</sup> and the LCI data is allocated based on mass or  
 191 price as shown in Table S7. Detailed LCI based on mass and price allocation can be found in  
 192 Table S8. The transportation from collection stack to production plant is included in the GREET  
 193 model for soybean production.

194 **Table S7.** Mass and price allocation for soybean PC

|                      | Mass allocation | \$ allocation |
|----------------------|-----------------|---------------|
| Soybean PC, 8% water | 49.8%           | 75.4%         |
| Soybean, hulls       | 6.83%           | 0.840%        |
| Soybean, crude oil   | 16.6%           | 20.7%         |
| Soybean, molasses    | 26.8%           | 3.10%         |

195 **Table S8.** LCI of soybean PC production based on mass and price allocation methods

| Inputs                      | Mass allocation | \$ allocation | Units |
|-----------------------------|-----------------|---------------|-------|
| Soybean (water content 13%) | 9.23E-01        | 1.40E+00      | kg    |
| Diesel, extraction          | 3.78E-01        | 5.72E-01      | MJ    |
| Electricity, extraction     | 2.77E-01        | 4.19E-01      | kWh   |
| Natural gas, extraction     | 6.64E-01        | 1.01E+00      | MJ    |
| Process water               | 2.31E-01        | 3.49E-01      | kg    |
| Output                      |                 |               |       |
| SPC, 8% water               | 1.00E+00        | 1.00E+00      | kg    |

|             |          |          |    |
|-------------|----------|----------|----|
| Waste water | 1.53E-01 | 2.32E-01 | kg |
|-------------|----------|----------|----|

196

197 2.2 LCIs of whey PC

198 Commercial whey PC is produced by ultrafiltration, evaporation, and drying of liquid whey, with  
199 its LCI sourced from literature.<sup>30</sup> The LCI of whey PC can be found in Table S9. In this study,  
200 algal coproduct can be used to replace whey PC 60 (60% protein content) due to comparable  
201 protein content. Upstream LCI data associated with liquid whey, including milk and cheese  
202 production can be found in our previous study.<sup>2</sup> Liquid whey, a byproduct of cheese production,  
203 necessitates the use of allocation and system expansion methods to ascertain its environmental  
204 impacts. In life cycle assessment (LCA) studies, directly substituting one co-product with  
205 another, such as replacing whey PC with microalgae PC, is challenging due to the uncertainties  
206 of different methodological approaches. To capture the environmental credits from liquid whey  
207 production, both allocation and system expansion methods are employed. For assessing upstream  
208 liquid whey's environmental impacts, the GREET model and other literature sources are used.<sup>31</sup>,  
209 <sup>32</sup> Kim et al. provided a comprehensive LCI for liquid whey on a dry mass basis using three  
210 allocation approaches: milk solids weight, plant-specific allocation from survey data, and  
211 revenue-based allocation when the first two are not viable.<sup>31</sup> Aguirre-Villegas et al. used  
212 economic value, solid content, and nutritional value for allocation when direct system  
213 subdivision isn't possible.<sup>32</sup> The system expansion method is another approach to attribute  
214 environmental credits to liquid whey production, exemplified by literature that substitutes the  
215 environmental impacts from liquid whey with those from barley production.<sup>33</sup> A detailed  
216 comparison of greenhouse gas (GHG) emissions from liquid whey production across different  
217 sources is presented in Table S10, and economic allocation has been selected to represent the  
218 LCA results from liquid whey production.

219 **Table S9.** LCI of whey PC production

| Input                | Unit              | WPC35 | WPC60 | WPC80 |
|----------------------|-------------------|-------|-------|-------|
| Whey (6% dry weight) | kg/kg of whey PC  | 46    | 80    | 113   |
| Electricity          | kWh/kg of whey PC | 0.49  | 0.56  | 0.55  |
| Natural gas          | MJ/kg of whey PC  | 3.6   | 3.8   | 3.8   |
| Water consumption    | kg/kg of whey PC  | 0.0   | 1.3   | 3.1   |

220

221 **Table S10.** GHG emission result comparison for 1 kg of liquid whey production

|                                                      | GHG emissions | Units                                             | Notes                                                                                         | Ref. |
|------------------------------------------------------|---------------|---------------------------------------------------|-----------------------------------------------------------------------------------------------|------|
| The production of barley (ready for use at the farm) | 0.74          | kg CO <sub>2</sub> -eq./kg of barley dry mass     | System expansion                                                                              | 33   |
| Whey powder                                          | 0.82          | kg CO <sub>2</sub> -eq./kg whey powder            | Economic allocation (cheese: 9.53 kg CO <sub>2</sub> -eq./kg; 7% is allocated to whey powder) | 34   |
| Whey powder                                          | N.A.          | kg CO <sub>2</sub> -eq./kg whey powder            | Mass allocation (33% is allocated to whey powder)                                             | 34   |
| Liquid whey                                          | 7.35          | kg CO <sub>2</sub> -eq./kg liquid whey (dry mass) | Process-based mixed allocation method and GREET                                               | 31   |
| Liquid whey                                          | 8.51          | kg CO <sub>2</sub> -eq./kg liquid whey (dry mass) | LCI and solid content allocation and GREET                                                    | 32   |
| Liquid whey                                          | 5.28          | kg CO <sub>2</sub> -eq./kg liquid whey (dry mass) | LCI and nutritional value allocation and GREET                                                | 32   |
| Liquid whey                                          | 2.04          | kg CO <sub>2</sub> -eq./kg liquid whey (dry mass) | LCI and economic value allocation and GREET                                                   | 32   |

222

### 223 2.3 LCIs of chicken meat products and microalgae protein-based meat alternative

224 As shown in Figure S3, the system boundary of chicken meat and meat alternative production are

225 confined to processing plants since it is assumed that chicken meat and meat alternative will go

226 through similar processes after processing plants. It is noticeable that additional food quality

227 control may be needed by using open runway pond as the cultivation media. These steps are

228 omitted from this study for simplification purposes.

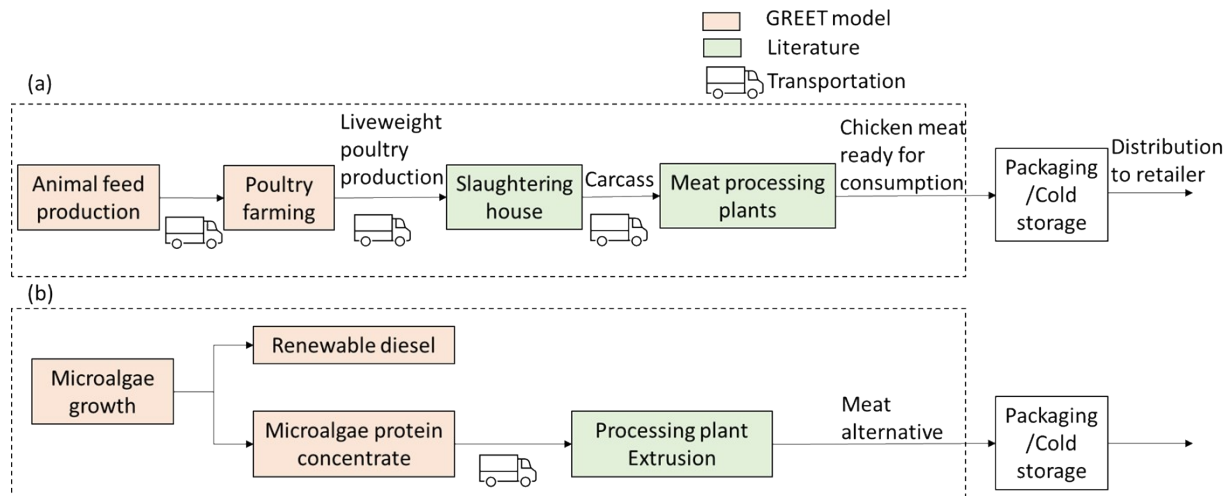

229  
230 **Figure S3.** Flow diagram of chicken meat and microalgae-based chicken meat alternative

231 production from cradle to production plant gate (boundary confined within dashed lines)

### 232 2.3.1 LCI of Chicken Meat

233 The microalgae PC co-product can be further processed to replace meat, with chicken considered  
234 as the replacement in this study. While beef, pork, and other types of meat could also be potential  
235 targets for replacement, they are not investigated here. Chicken meat substitution is selected as  
236 an example to demonstrate the potential for GHG emission and cost reduction. The system  
237 boundaries for meat alternative and chicken are both from raw material extraction to production  
238 plant gate since it is assumed that meat alternative and chicken meat will go through similar  
239 processes after production. As shown in Figure S3(a), the LCIs of animal feed production and  
240 live poultry farming illustrated in pink color are obtained from GREET model. The LCIs of  
241 poultry slaughtering and chicken meat processing shown in green are obtained from literature,<sup>35</sup>  
242 and detailed inventories for poultry slaughtering and chicken meat processing, and associated  
243 upstream data can be found in Tables S11-S13. The LCI of poultry slaughtering and processing  
244 are based on Serbia conditions, and it is assumed that similar processes are used to produce  
245 chicken meat in the U.S. due to lack of detailed LCI data for the U.S. Truck is assumed to be

246 used in poultry and poultry product transportation, and the average transportation distance from  
 247 farm to slaughtering house and from slaughtering house to processing plant are set to be 0.03 kg-  
 248 km and 0.01 kg-km, respectively. It is noticeable that the transportation energy for carrying  
 249 carcasses from slaughtering house to processing plant may be higher than the calculated value  
 250 due to the use of refrigerator and the energy consumption for meat refrigerating is omitted in this  
 251 study for simplification purposes.

252 **Table S11.** LCIs of poultry slaughtering and chicken meat processing

| <b>Inputs</b>                    | Slaughtering house | Meat processing plant | Unit           | Notes                                          |
|----------------------------------|--------------------|-----------------------|----------------|------------------------------------------------|
| Live weight chicken              | 1.4                |                       | kg             |                                                |
| Water                            | 9.0                | 6.5                   | kg             |                                                |
| NaOH                             | 0.001              | 0.016                 | kg             |                                                |
| <b>NaClO</b>                     | 0.0003             | 0.004                 | kg             | See sodium hypochlorite (NaClO) section below  |
| Electricity                      | 0.64               | 1.4                   | kg             |                                                |
| Diesel                           | 0.33               |                       | MJ             |                                                |
| LPG                              | 0.051              |                       | MJ             |                                                |
| Natural gas                      | 0.29               |                       | MJ             |                                                |
| PVC film E                       | 0.002              | 0.008                 | Kg             | Omitted from the study for comparison purposes |
| Polypropylene PP                 |                    | 0.026                 | Kg             | Omitted from the study for comparison purposes |
| Paper                            | 0.001              | 0.036                 | kg             | Omitted from the study for comparison purposes |
| Transport                        | 0.03               | 0.01                  | kg-km          |                                                |
| <b>Outputs</b>                   |                    |                       |                |                                                |
| Chicken meat                     | 1                  | 1                     | kg             |                                                |
| <b>Wastewater with biowastes</b> | 0.008              | 0.007                 | m <sup>3</sup> | See “wastewater treatment” section below       |

253

254 **Sodium hypochlorite (NaClO)**



255 Sodium hypochlorite (NaClO) is prepared by reacting dilute caustic soda solution with liquid or  
256 gaseous chlorine as shown in the stoichiometry below. The reaction is exothermic and after the  
257 reaction, the mixture is cooled. The yield is assumed to be close to 100% of theoretical value and  
258 the pH adjustment is omitted from the inventory. Detailed LCI can be found in Table S12.

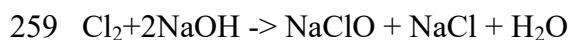

260 **Table S12.** LCI of NaClO

| Inputs           | Quantity (kg) |
|------------------|---------------|
| Cl <sub>2</sub>  | 0.95          |
| NaOH             | 1.07          |
| Outputs          | Quantity (kg) |
| NaClO            | 1.00          |
| NaCl             | 0.79          |
| H <sub>2</sub> O | 0.24          |

261

## 262 **Wastewater treatment**

263 Slaughterhouse wastes contain high fat and protein content, and different methods have been  
264 used to treat the wastes, such as composting, aerobic and anaerobic digestion, alkaline hydrolysis,  
265 rendering, and incineration.<sup>36, 37</sup> Here, it is assumed that the waste from slaughterhouse are co-  
266 treated with wastewater in municipal wastewater treatment plants. The LCI of municipal  
267 wastewater treatment is obtained from literature and the primary unit processes include  
268 wastewater collection, screening and grit removal, primary sedimentation, sludge thickening and  
269 dewatering, sludge incineration, aeration, secondary clarifiers, and primary disinfection and  
270 sodium hypochlorite.<sup>38</sup>

271 Polyacrylamide (PAM) is used in sludge thickening and dewatering, and the LCI is not available  
272 in GREET model. At the industrial scale, water soluble PAM is mainly synthesized by a free

273 radical polymerization process.<sup>39</sup> Free-radical polymerization is a process to produce hydrogels  
 274 by using low-weight monomers in the presence of a cross-linking agent, and for PAM production,  
 275 water is often considered a solvent choice.<sup>40</sup> Here, the water media used for radical  
 276 polymerization is omitted due to lack of data. The energy consumption for radical  
 277 polymerization of PAM is estimated from the energy consumption for polymerizing  
 278 superabsorbent polymers.<sup>41</sup> The input material for producing PAM is acrylamide monomer, and  
 279 nowadays, acrylamide monomer is mainly produced from acrylonitrile by a biological process  
 280 using enzyme, which has high conversion efficiency and selectivity. As a result, the production  
 281 of acrylamide is based on the stoichiometry of the reaction listed below, and detailed LCI of  
 282 PAM is shown in Table S13.

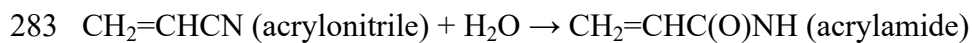

284 **Table S13.** LCI of PAM production

| Inputs        | Quantity | Unit |
|---------------|----------|------|
| Acrylonitrile | 0.75     | kg   |
| Water         | 0.25     | kg   |
| Electricity   | 4.4      | kWh  |
| Outputs       |          |      |
| PAM           | 1        | kg   |

285

286 The environmental impacts of municipal wastewater treatment (1 m<sup>3</sup>) are calculated by using  
 287 GREET model, and GHG emissions and total energy consumption are compared with the results  
 288 from literature for data quality purposes.<sup>38</sup>

289 **Table S14.** LCA result comparison between GREET model and Cashman et al. (2014)

|                                                   | GREET model                           | Cashman et al.                                                                  |
|---------------------------------------------------|---------------------------------------|---------------------------------------------------------------------------------|
| Total energy (Btu/m <sup>3</sup> )                | 5,555                                 | 7,383                                                                           |
| GHG emission (g-CO <sub>2</sub> /m <sup>3</sup> ) | 395 (excl. biogenic CO <sub>2</sub> ) | 470 (excl. biogenic CO <sub>2</sub> );<br>960 (incl. biogenic CO <sub>2</sub> ) |

290 2.3.2 LCI of Microalgae Protein-Based Meat Alternatives

291 Microalgae have higher protein content than meat, and comparable nutrients, such as key amino  
292 acid and vitamins. The protein digestibility and absorption of microalgae protein is slightly lower  
293 than beef and beef products, and comparable with soybean, wheat gluten, and wheat cereal  
294 protein.<sup>42</sup> Plant-based meat alternatives are produced by extrusion, and there are two major  
295 extrusion technologies: high moisture extrudates (HME) and low moisture texturized vegetable  
296 protein (TVP). The main difference between these two technologies are the moisture content  
297 inside the extrusion barrel.<sup>43</sup> In this study, HME technology is selected to represent the process  
298 to produce meat alternatives and it undergoes the same process as chicken meat after production  
299 plants as shown in Figure S3. The water and energy consumption for processing dried  
300 microalgae PC is adjusted from processing dried soybean PC to meat alternative. This  
301 adjustment is based on their similar water and energy consumption, as communicated with the  
302 expert from DIL-eV.<sup>44</sup> Notably, dried microalgae PC can be only included in meat alternative up  
303 to 30% when combined with soybean PC due to its properties, and the moisture content in HME  
304 is ~60%. To simplify the model, it is assumed that 30% of chicken meat alternative is from dried  
305 microalgae and the rest of 10% is from dried soybean PC, which is recommended by the expert  
306 form DIL-eV. <sup>44</sup> Other ingredients, such as seasonings, are not included due to a lack of data.  
307 The detailed LCI for producing 1 kg of microalgae-based meat alternative can be found in Table  
308 S15.

309 **Table S15.** LCI for processing dried microalgae PC to chicken meat alternative

| Input                   | Quantity | Unit |
|-------------------------|----------|------|
| Dried microalgae PC     | 0.3      | kg   |
| Dried soybean PC        | 0.1      | kg   |
| Water                   | 23.4     | kg   |
| Electricity consumption | 0.29     | kWh  |
| Output                  |          |      |

|                  |       |    |
|------------------|-------|----|
| Meat alternative | 1     | kg |
| Biowastes        | 0.033 | kg |

310

### 311 3. Correction Factor R

312 The correction factor R is used to measure the hardness to desalinate saline water with different  
 313 salinity to freshwater, and this factor has been incorporated into WSF calculation to quantify  
 314 quality-based WSF. Detailed explanation of saline water-based WSF can be found in Section  
 315 2.2.7 in the main context, and the relationship between correction factor R and salinity is shown  
 316 in Figure S4.

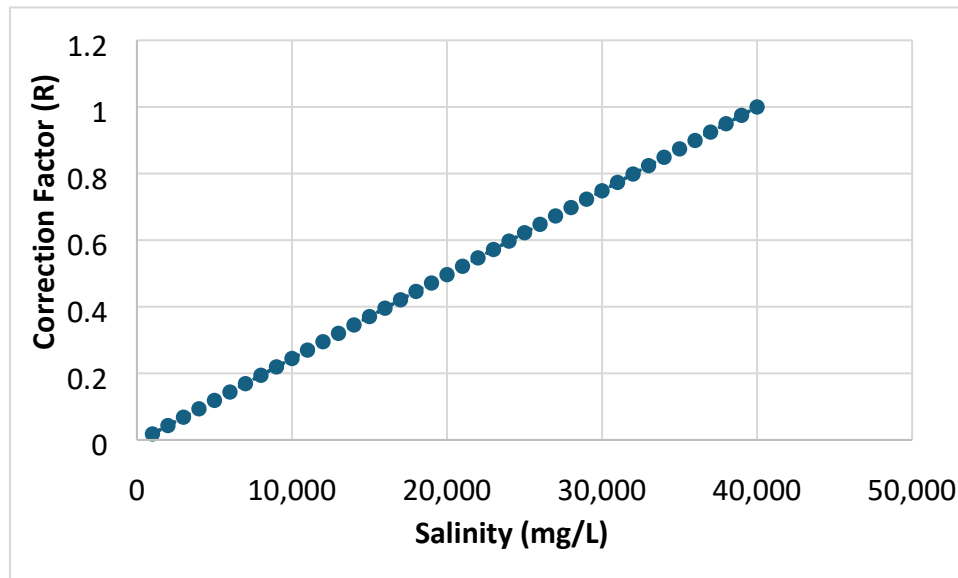

317

318

**Figure S4.** Relationship between correction factor R and salinity

319

### 320 4. Direct Land Use Change and Indirect Land Use Change

321 The equation below shows the carbon emission calculation for direct land use change (DLUC) of  
 322 microalgal biorefineries.

323  $DLUC = EF_{DLUC} \times Facility\ Size \times EA / LT / FP_{Annual}$

$$EF_{DLUC} = \sum_i^{All\ land\ uses} p_i \times EF_{i2o}$$

...Eq. S3

324

325

326 *DLUC* – Annual land use change emissions per unit of fuel (g CO<sub>2</sub>-eq./MJ of fuel);

327 *EF<sub>DLUC</sub>* – Direct land use change emissions factor (g CO<sub>2</sub>/ha);

328 *Facility Size* – (ha);

329 *EA* – Energy allocation (%). Only DLUC emissions from the fuel only case are calculated and

330 *EA* = 100%;

331 *LT* – plant lifetime (years). LT of microalgae plant = 30 years;

332 *FP<sub>Annual</sub>* – Annual fuel production (MJ/year);

333 *P<sub>i</sub>* – percentage of original land use *i*;

334 *Ef<sub>i2o</sub>* – Carbon emission factor by changing from original land use *i* to open pond.

335

336 Figures S5 illustrates that direct land use change (DLUC) emissions vary between -1.83 g CO<sub>2</sub>-

337 eq./MJ and 9.33 g CO<sub>2</sub>-eq./MJ, with an average of 1 g CO<sub>2</sub>-eq./MJ. In addition, the probability

338 of original land use for the selected sites are shown in Figure S6.

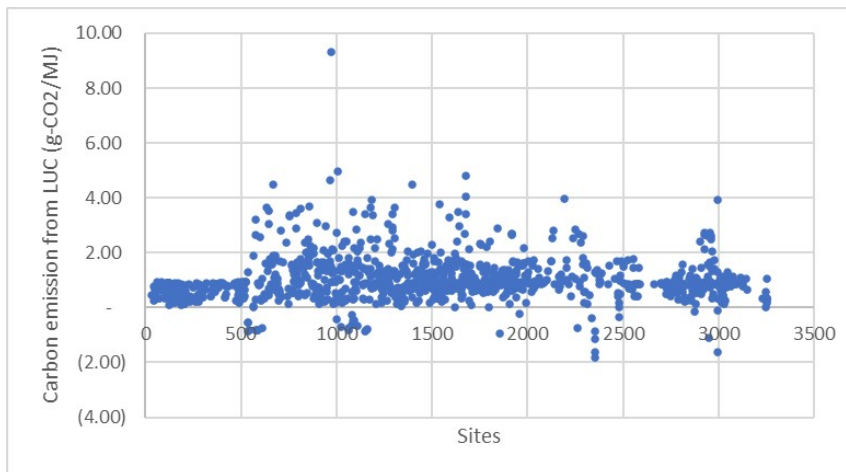

339 **Figure S5.** Direct land use change carbon emissions

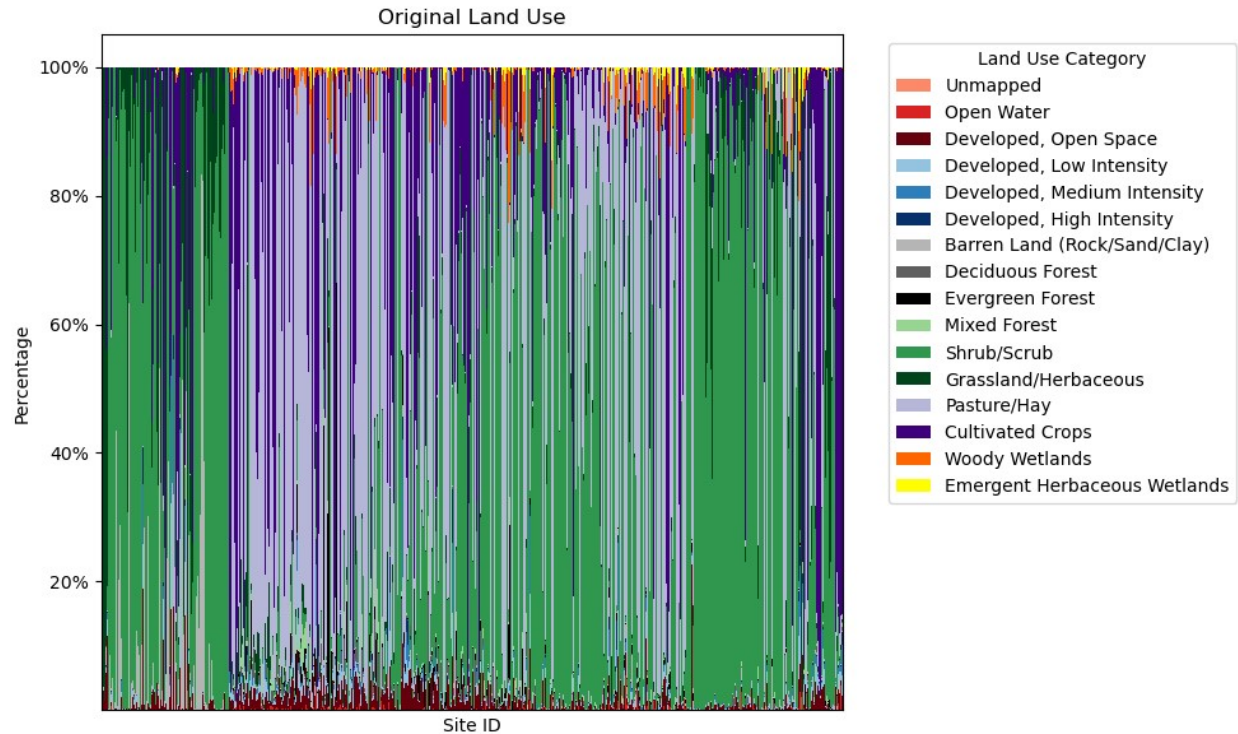

340

341 **Figure S6.** Probability of original land use in each site

342 Table S16 summarizes the emissions from land use change (LUC) of soybean, milk, and chicken  
 343 meat production in different sources. The summary aims to provide the LUC emissions from  
 344 conventional target protein products. While some reviewed studies explicitly attribute emissions  
 345 to ILUC or DLUC, others do not specify. Emissions attributed to DLUC in some studies may be  
 346 ILUC in others. For example, if crops replaced by microalgae are cultivated in Brazil, DLUC  
 347 emissions in Brazil in ILUC in the U.S.

348 Emissions from ILUC can significantly affect the final results. To exemplify potential ILUC  
 349 carbon emissions from microalgal biorefineries, we assume the original cropland use is for  
 350 soybean cultivation. As per Table S16, soybean LUC carbon emissions could vary from 455 to  
 351 46,100 kg/ha. In our study, GHG emissions from microalgae cultivation and harvesting range  
 352 from 50,600 to 117,000 kg/ha. The example represents the larger values of ILUC carbon

353 emissions, and the use of croplands for algae cultivation should be avoided since one of the  
 354 advantages of algae farms is their ability to grow on marginal land. Quantifying the actual  
 355 variations is challenging with diverse original crops and hay/pasture productions in different  
 356 locations.

357 **Table S16.** Summary of land use change (LUC) emissions from selected literature

|                         | References                                                      | LUC emissions (kg CO <sub>2</sub> -eq./kg product) | LUC emissions (kg CO <sub>2</sub> -eq./hectare) | Region         |
|-------------------------|-----------------------------------------------------------------|----------------------------------------------------|-------------------------------------------------|----------------|
| Soybean production      | Castanheira and Freire (2013) <sup>45</sup> (DLUC) <sup>a</sup> | 0.06-17.80                                         | 455 - 46,120                                    | Latin America  |
|                         | Esteves et al. (2016) <sup>46</sup>                             | 0.75-4.27                                          | 1,973 - 11,154                                  | Brazil         |
|                         | U.S. EPA (2010) <sup>47</sup> , (ILUC) <sup>a</sup>             | 0.24                                               | 821                                             | United States  |
|                         | Searchinger and Heimlich (2008) <sup>48</sup>                   | 0.78 - 2.12                                        | 2,669 - 7,277                                   | United States  |
| Milk production         | Audsley et al. (2009); Flysjö et al. (2012) <sup>49, 50</sup>   | 0.66-0.83 <sup>b</sup>                             | 1430                                            | United Kingdom |
| Chicken meat production | Schmidt et al. (2011); Flysjö et al. (2012) <sup>50, 51</sup>   | 1.38-2.11 <sup>b</sup>                             | 5,470 - 5,850                                   | Global         |
|                         | Caro et al. (2018) <sup>52</sup> (DLUC) <sup>a</sup>            | 0.51                                               | 34,800                                          | Brazil         |
|                         | Ponsioen and Blonk (2012) <sup>53</sup> (DLUC) <sup>a</sup>     | 2.04                                               | 4,900-12,200                                    | Global         |

358 <sup>a</sup>If the studies specifically indicate the emissions are from DLUC or ILUC, it is listed in the parenthesis.

359 <sup>b</sup>Cows coproduce milk and meat, and the carbon emissions from LUC for milk production are calculated based on system  
 360 expansion method.

361  
 362

363 5. Nutrient and energy consumption comparison between saline algae and soybean  
 364 cultivation (per kg AFDW)

365 Based on the biorefinery-level GHG emission results, conventional soybean PC production  
 366 generates far fewer GHG emissions than microalgae-based PC. The material and energy  
 367 consumption for the cultivation of soybeans and microalgae are compared in Table S17, where it  
 368 is shown that significantly less energy and fewer nutrients are required for the production of 1 kg  
 369 of AFDW soybean.

370 **Table S17.** Energy and nutrients comparison between algae and soybean cultivation

|             | Algae cultivation | Soybean cultivation | Units per kg AFDW |
|-------------|-------------------|---------------------|-------------------|
| Electricity | 0.60              | 0.019               | kWh               |
| Natural gas | 1.8               | 0.57                | MJ                |
| Carbon      | 0.44              | 0                   | kg                |
| Nitrogen    | 0.054             | 0.0023              | kg                |
| Phosphorus  | 0.0044            | 0.0040              | kg                |

371

372 6. MSP by accounting protein selling credits and GHG emissions by using economic  
 373 allocation

374 To facilitate the comparison with the results from other studies, MSP by accounting protein  
 375 selling credits and GHG emissions by using economic allocation method are shown in Figures  
 376 below.

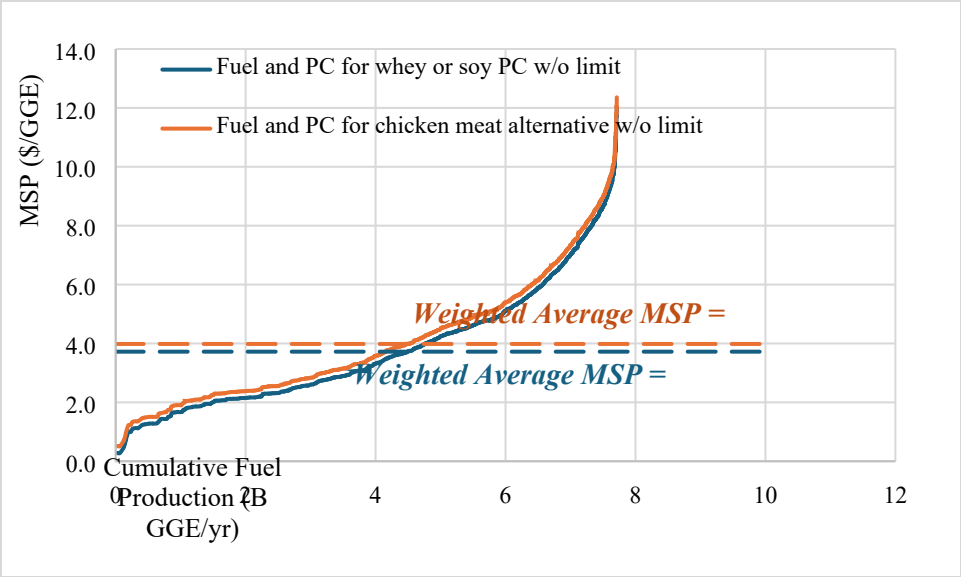

377

378 **Figure S7.** MSP by accounting protein selling price



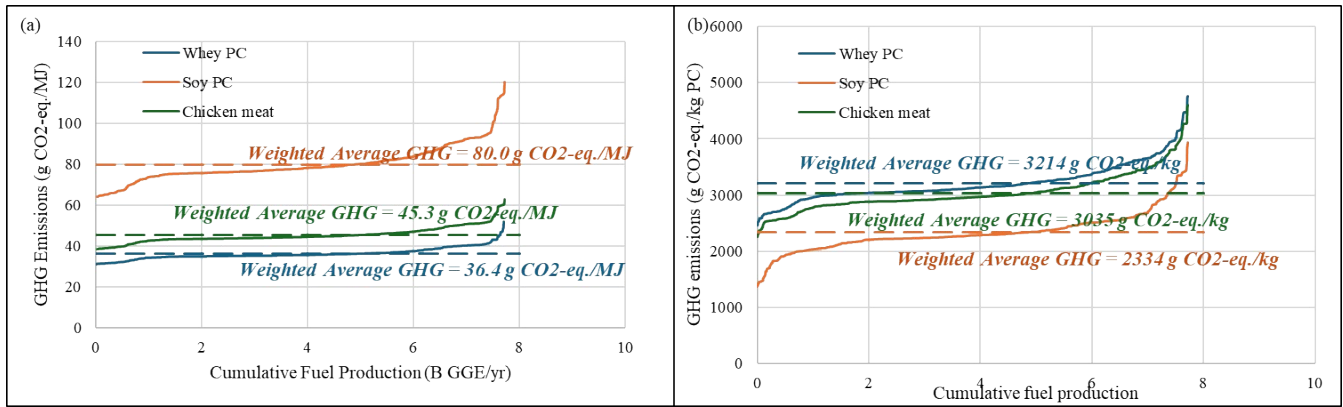

379

380 **Figure S8.** GHG emissions for (a) 1 MJ of fuel and (b) 1 kg of PC by using economic allocation  
 381 method

382 7. MSP and GHG emissions breakdown

383 MSP and GHG emissions breakdown for fuel and PC scenario and fuel only scenario are shown  
 384 in Figures S9 and S10. Algae growth and CO<sub>2</sub> capture and transport contribute to the largest  
 385 MSP and GHG emissions.

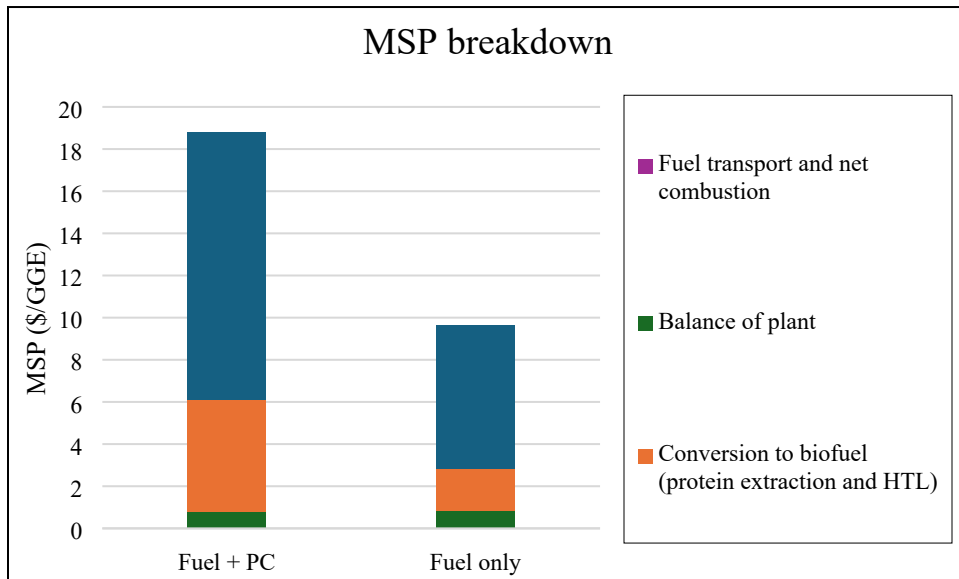

386

387 **Figure S9.** MSP breakdown by life cycle stages

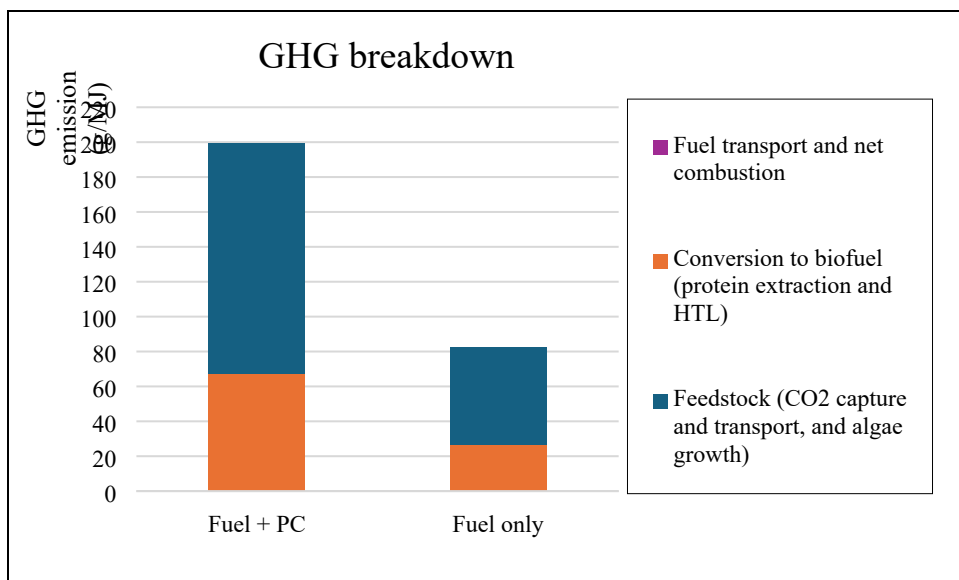

388

389 **Figure S10.** GHG emissions breakdown by life cycle stages

390 8. Benchmarking MSP and GHG emissions with Other Studies

391 For validation purposes, the MSP and GHG emission results obtained from the literature are

392 compared with those from this study, and the comparison is summarized in Table S18.

393 **Table S18.** Comparison and validation with other studies

| References                 | Functional Unit  | MFSP or GHG Emissions                                                                        | Coproduct Handling | Conversion to Comparable Units                                                                  | Our Study Results                                                                                                                      |
|----------------------------|------------------|----------------------------------------------------------------------------------------------|--------------------|-------------------------------------------------------------------------------------------------|----------------------------------------------------------------------------------------------------------------------------------------|
| Batan et al. <sup>54</sup> | per L biodiesel  | \$3.69/L from fuel only; \$-0.47/L from fuel and aquaculture feed and naphtha as coproducts. | N/A                | \$15.0/GGE from fuel only; - \$1.9/GGE from fuel and aquaculture feed and naphtha as coproducts | \$6.7-13.1/GGE from fuel only; \$0.28-12/GGE from fuel and PC for soybean or whey PC; -\$2.0-9.8/GGE from fuel and PC for chicken meat |
| Beal et al. <sup>55</sup>  | per ha and per L | \$2.64/L from fuel only; \$0.86/L from fuel and algal meal feed as a coproduct (Case 8)      | System expansion   | \$10.7 from fuel only; \$3.5/GGE from fuel and algal meal feed as a coproduct (Case 8)          | \$0.28-\$12/GGE from fuel and PC production for soybean PC                                                                             |

|                                    |               |                                                                             |                  |                                                                |                                                          |
|------------------------------------|---------------|-----------------------------------------------------------------------------|------------------|----------------------------------------------------------------|----------------------------------------------------------|
| Gnansounou and Raman <sup>56</sup> | per km travel | 260 g/km with biofuel and coproduct for soybean protein used as animal feed | System expansion | 130 g CO <sub>2</sub> -eq./[1 MJ biodiesel + 0.051 kg protein) | 109-219 g CO <sub>2</sub> -eq./ [1 MJ fuel + 0.05 kg PC] |
|------------------------------------|---------------|-----------------------------------------------------------------------------|------------------|----------------------------------------------------------------|----------------------------------------------------------|

394 \*Low heating value (LHV) of conventional diesel is 128,450 Btu/gal and biodiesel is ~119,624 Btu/gal  
395 \* Fuel economy given in Gnansounou and Raman is 0.053 kg biodiesel/km; protein production is 1.94 kg protein/kg algae  
396 biodiesel  
397

398 9. GHG emissions from four different cases

399 GHG emissions from four different cases using the current U.S. electricity mix, electricity at half  
400 the carbon intensity compared to the current condition, and carbon-neutral electricity are  
401 depicted in Figure S11. Sites where GHG emissions exceed those from conventional fuel and PC  
402 production are excluded from the analysis since reducing GHG emissions from biorefinery  
403 systems is a key research objective. Figure S11(b) represents the biorefinery-level GHG  
404 emissions from fuel and PC production for soybean PC or whey PC. The yellow and purple lines  
405 in Figure S11(b) represent GHG emissions for fuel and PC production for whey PC only, as all  
406 soybean PC cases are removed from the analysis due to their higher GHG emissions compared to  
407 conventional fuel and soybean PC production with current U.S. electricity mix and electricity at  
408 half the carbon intensity compared to the current condition. Microalgal fuel and PC production  
409 for soybean PC can achieve lower biorefinery-level GHG emissions than conventional fuel and  
410 soybean PC production at specific sites using carbon-neutral electricity. Since the market size of  
411 protein ingredient (soybean PC) is larger than whey PC, the green line in Figure S11(b) reflects  
412 the biorefinery-level GHG emissions within protein ingredient market. The benchmarks of  
413 biorefinery-level GHG emissions and market pricing for all cases are listed in Table S19.

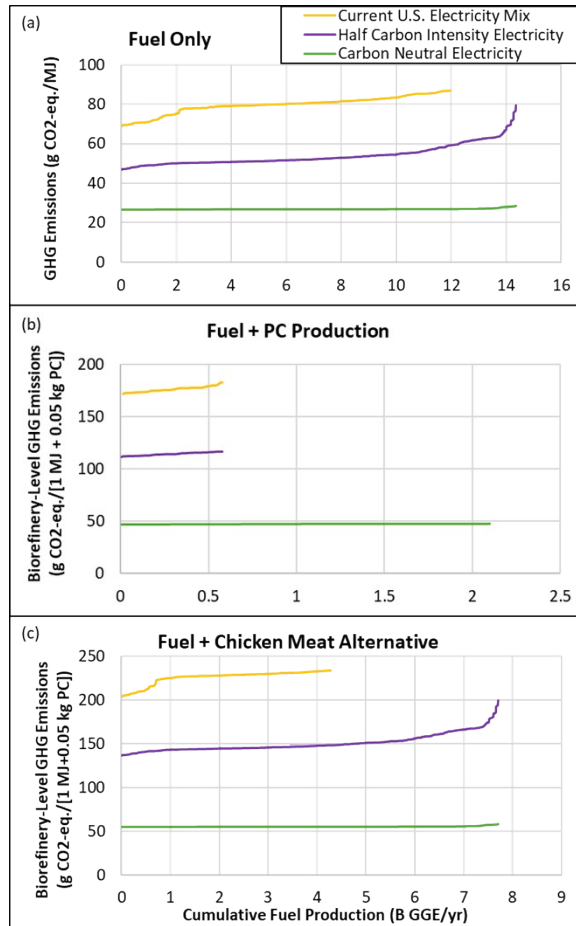

414

415 **Figure S11.** Biorefinery-level GHG emissions from (a) fuel only case, (b) fuel and PC  
 416 coproduction for soybean PC and whey PC case, and (c) fuel and PC coproduction for chicken  
 417 meat, capped by GHG emissions from conventional fuel and PC production

418

419 **Table S19.** Biorefinery-level GHG emission and market pricing benchmarks for conventional  
 420 fuel and PC production

|  | GHG emission benchmarks (g CO <sub>2</sub> -eq./MJ) |                                       |                            | Market pricing benchmarks (\$/GGE) |                                       |                            |
|--|-----------------------------------------------------|---------------------------------------|----------------------------|------------------------------------|---------------------------------------|----------------------------|
|  | Current U.S. Electricity Mix                        | Half Carbon Intensity Electricity Mix | Carbon Neutral Electricity | Current U.S. Electricity Mix       | Half Carbon Intensity Electricity Mix | Carbon Neutral Electricity |

|                                       |     |     |     |      |      |      |
|---------------------------------------|-----|-----|-----|------|------|------|
| Fuel                                  | 87  | 85  | 85  | 2.6  | 2.8  | 2.8  |
| Fuel + PC for substituting soybean PC | 116 | 111 | 104 | 9.2  | 9.4  | 9.4  |
| Fuel + Whey PC                        | 695 | 613 | 425 | 20.7 | 20.9 | 20.9 |
| Fuel + Chicken meat alternative       | 233 | 207 | 156 | 21.8 | 22.0 | 22.0 |

421 10. Relationship Between Total Dissolved Solids (TDS) and minimum selling price and  
 422 GHG Emissions

423 Figure S13 shows the relationship between TDS and minimum selling price (MSP) and GHG  
 424 emissions in different cases. No significant correlation has been found between TDS and MSP  
 425 and between TDS and GHG emissions. However, it is shown that GHG emissions have a  
 426 stronger relationship with TDS than MSP, since electricity consumption is one of the main  
 427 drivers of GHG emissions, and desalination electricity consumption is correlated with salinity.

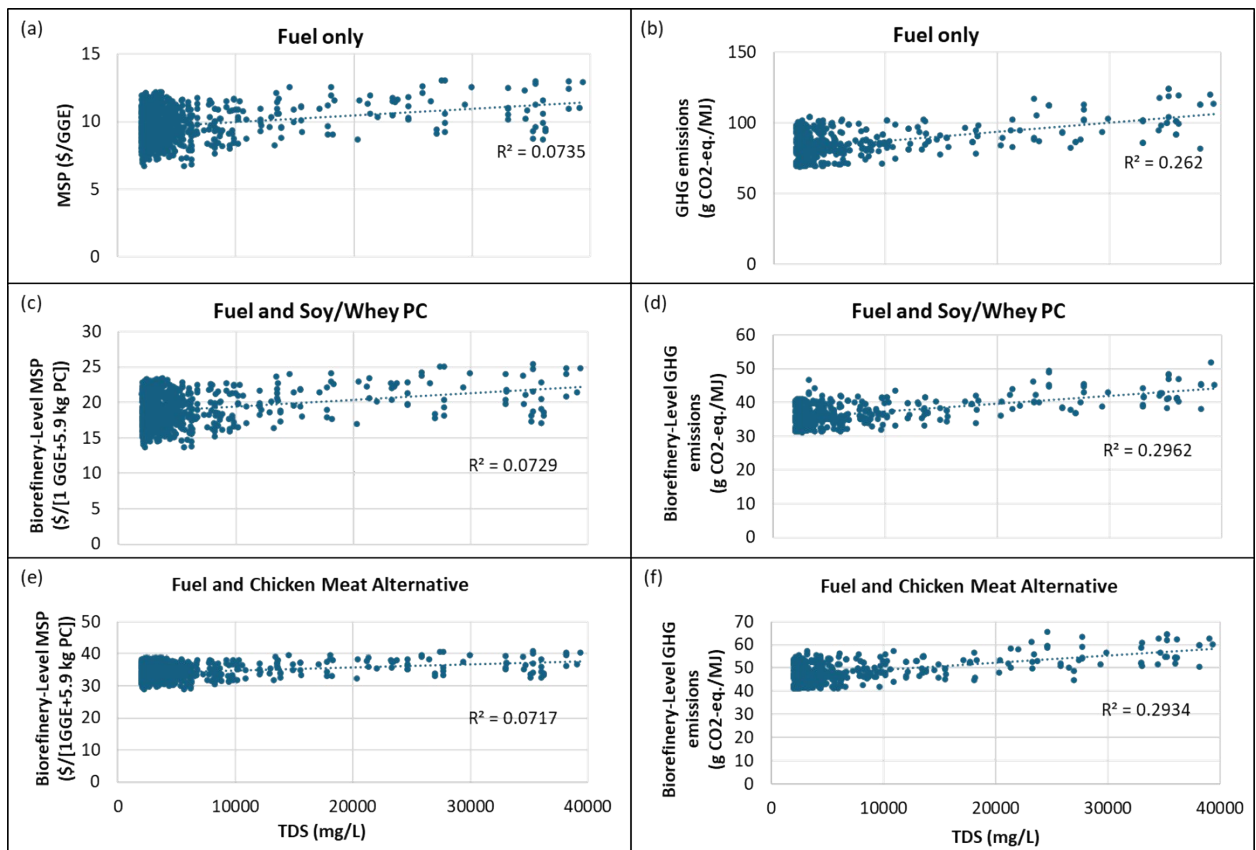

428

429 **Figure S12.** Relationships between TDS and MSP and GHG emissions in different cases (a) and  
430 (b) fuel only, (c) and (d) fuel and PC production for soybean or whey PC, and (e) and (f) fuel and  
431 PC production for fuel and PC production for chicken meat alternative.

432 11. Spatially Explicit TDS, freshwater characterization factor, biomass productivity, and  
433 biomass yield

434 As mentioned in the main text, three main regions are investigated in the study: Southwest,  
435 South Central, and Western. There is no indication that any particular region is better for TDS or  
436 biomass yield. However, the Southeast has the lowest freshwater characterization factor and  
437 highest biomass productivity according to Figure S14.

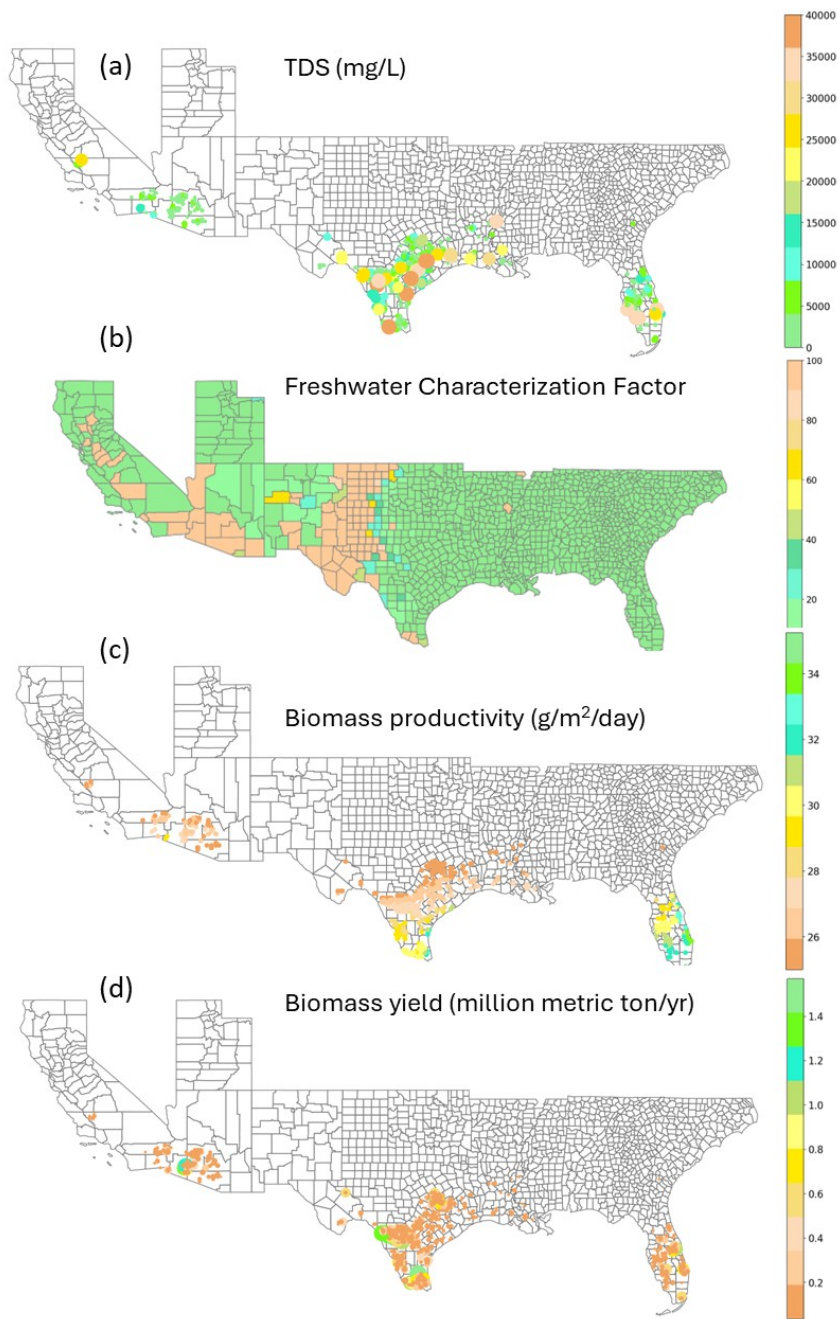

438

439 Figure S13. Spatially explicit (a) TDS (mg/L), (b) freshwater characterization factor, (c) biomass  
 440 productivity (g/m<sup>2</sup>/day), and (d) biomass yield (million metric ton/yr)

441 References

442

- 443 1. U. Singh, S. Banerjee and T. R. Hawkins, *ACS Sustainable Chemistry & Engineering*, 2023, **11**,  
444 14435-14444.
- 445 2. R. H. Davis, Troy R.; Coleman, Andre; Gao, Song; Klein, Bruno; Wiatrowski, Matthew; Zhu,  
446 Yunhua; Xu, Yiling; Snowden-Swan, Lesley; Valdez, Peter; Zhang, Jingyi; Singh, Udayan; Ou,  
447 Longwen, *Economic, Greenhouse Gas, and Resource Assessment for Fuel and Protein*  
448 *Production from Microalgae: 2022 Algae Harmonization Update*, 2024.
- 449 3. M. E. Huntley, Z. I. Johnson, S. L. Brown, D. L. Sills, L. Gerber, I. Archibald, S. C. Machesky, J.  
450 Granados, C. Beal and C. H. Greene, *Algal research*, 2015, **10**, 249-265.
- 451 4. M. Huesemann, S. Edmundson, S. Gao, S. Negi, T. Dale, A. Gutknecht, H. E. Daligault, C. K.  
452 Carr, J. Freeman and T. Kern, *Algal Research*, 2023, **71**, 102996.
- 453 5. G. P. Thiel, E. W. Tow, L. D. Banchik and H. W. Chung, *Desalination*, 2015, **366**, 94-112.
- 454 6. A. Panagopoulos, K.-J. Haralambous and M. Loizidou, *Science of the Total Environment*, 2019,  
455 **693**, 133545.
- 456 7. B. Klein and R. Davis, *Algal biomass production via open pond algae farm cultivation: 2022*  
457 *state of technology and future research*, National Renewable Energy Laboratory (NREL), Golden,  
458 CO (United States), 2023.
- 459 8. E. Esposito, L. Dellamuzia, U. Moretti, A. Fuoco, L. Giorno and J. C. Jansen, *Energy &*  
460 *Environmental Science*, 2019, **12**, 281-289.
- 461 9. M. I. o. Technology, LaBarge Fact Sheet: Carbon Dioxide Capture and Storage Project.,  
462 [https://sequestration.mit.edu/tools/projects/la\\_barge.html](https://sequestration.mit.edu/tools/projects/la_barge.html), (accessed 6/4, 2024).
- 463 10. H. Pilorgé, N. McQueen, D. Maynard, P. Psarras, J. He, T. Rufael and J. Wilcox, *Environmental*  
464 *science & technology*, 2020, **54**, 7524-7532.
- 465 11. J. Zhang, H. Yuan, Y. Deng, I. M. Abu-Reesh, Z. He and C. Yuan, *The International Journal of*  
466 *Life Cycle Assessment*, 2019, **24**, 1962-1975.
- 467 12. N. Tangsubkul, K. Parameshwaran, S. Lundie, A. Fane and T. Waite, *Journal of membrane*  
468 *science*, 2006, **284**, 214-226.
- 469 13. C. Safi, G. Olivieri, R. P. Campos, N. Engelen-Smit, W. Mulder, L. Van den Broek and L.  
470 Sijtsma, *Bioresource technology*, 2017, **225**, 151-158.
- 471 14. Z. Bashi, R. McCullough, L. Ong and M. Ramirez, Alternative proteins: The race for market  
472 share is on, [https://www.mckinsey.com/industries/agriculture/our-insights/alternative-proteins-](https://www.mckinsey.com/industries/agriculture/our-insights/alternative-proteins-the-race-for-market-share-is-on)  
473 [the-race-for-market-share-is-on](https://www.mckinsey.com/industries/agriculture/our-insights/alternative-proteins-the-race-for-market-share-is-on), (accessed 1/11, 2024).
- 474 15. U. S. D. o. Agriculture, *Dairy Market Statistics 2021 Annual Summary*, 2021.
- 475 16. Ycharts, US Chicken Wholesale Price,  
476 [https://ycharts.com/indicators/us\\_chicken\\_wholesale\\_price\\_georgia\\_dock](https://ycharts.com/indicators/us_chicken_wholesale_price_georgia_dock), (accessed 1/11, 2024).
- 477 17. G. V. Research, Protein Ingredients Market Size, Share & Trends Analysis Report By Product  
478 (Plant Proteins, Animal/Dairy Proteins, Microbe-based Proteins, Insect Proteins), By Application,  
479 By Region, And Segment Forecasts, 2021 - 2028., [https://www.grandviewresearch.com/industry-](https://www.grandviewresearch.com/industry-analysis/protein-ingredients-market)  
480 [analysis/protein-ingredients-market](https://www.grandviewresearch.com/industry-analysis/protein-ingredients-market), (accessed 10/1, 2022).
- 481 18. G. V. Research, Whey Protein Market Size, Share & Trends Analysis Report By Type (WPI,  
482 WPC, WPH), By Application (Sports Nutrition, Dietary Supplements, Beverages), By Region,  
483 And Segment Forecasts, 2022 – 2030. , [https://www.grandviewresearch.com/industry-](https://www.grandviewresearch.com/industry-analysis/whey-protein-market)  
484 [analysis/whey-protein-market](https://www.grandviewresearch.com/industry-analysis/whey-protein-market) (accessed 10/1, 2022).
- 485 19. U. S. D. o. Agriculture, *Dairy Products 2021 Summary*., Wahsington D.C.: Agricultural  
486 Marketing Service, 2022.
- 487 20. OECD, Food and A. O. o. t. U. Nations, *OECD-FAO Agricultural Outlook 2020-2029*, 2020.
- 488 21. IndexBox, World - Chicken Meat - Market Analysis, Forecast, Size, Trends and Insights,  
489 <https://www.indexbox.io/blog/global-chicken-meat-market-2023-key-insights/>, (accessed 1/14,  
490 2024).
- 491 22. P. Qin, T. Wang and Y. Luo, *Journal of Agriculture and Food Research*, 2022, **7**, 100265.
- 492 23. G. Philis, E. O. Gracey, L. C. Gansel, A. M. Fet and C. Rebours, *Journal of cleaner production*,  
493 2018, **200**, 1142-1153.



- 494 24. USDA, Chicken, broiler or fryer, breast, skinless, boneless, meat only, cooked, braised,  
495 <https://fdc.nal.usda.gov/fdc-app.html#/food-details/331960/nutrients>, (accessed 5/18, 2023).
- 496 25. M. A. Devi, G. Subbulakshmi, K. M. Devi and L. V. Venkataraman, *Journal of Agricultural and*  
497 *Food Chemistry*, 1981, **29**, 522-525.
- 498 26. A. Niccolai, G. C. Zittelli, L. Rodolfi, N. Biondi and M. R. Tredici, *Algal Research*, 2019, **42**,  
499 101617.
- 500 27. Y. Wang, S. M. Tibbetts and P. J. McGinn, *Journal*, 2021, **10**.
- 501 28. L. Soto-Sierra, P. Stoykova and Z. L. Nikolov, *Algal Research*, 2018, **36**, 175-192.
- 502 29. S. Smetana, M. Sandmann, S. Rohn, D. Pleissner and V. Heinz, *Bioresource Technology*, 2017,  
503 **245**, 162-170.
- 504 30. J. Bacenetti, L. Bava, A. Schievano and M. Zucali, *Journal of Food Engineering*, 2018, **224**, 139-  
505 147.
- 506 31. D. Kim, G. Thoma, D. Nutter, F. Milani, R. Ulrich and G. Norris, *The International Journal of*  
507 *Life Cycle Assessment*, 2013, **18**, 1019-1035.
- 508 32. H. Aguirre-Villegas, F. Milani, S. Kraatz and D. Reinemann, *Transactions of the ASABE*, 2012,  
509 **55**, 613-627.
- 510 33. T. Kristensen, K. Søgaard, J. Eriksen and L. Mogensen, *Journal of Cleaner Production*, 2015,  
511 **101**, 229-237.
- 512 34. S. González-García, É. G. Castanheira, A. C. Dias and L. Arroja, *Journal of cleaner production*,  
513 2013, **41**, 65-73.
- 514 35. D. Skunca, I. Tomasevic, I. Nastasijevic, V. Tomovic and I. Djekic, *Journal of Cleaner*  
515 *Production*, 2018, **184**, 440-450.
- 516 36. E. Bazrafshan, F. Kord Mostafapour, M. Farzadkia, K. A. Ownagh and A. H. Mahvi, *PloS one*,  
517 2012, **7**, e40108.
- 518 37. I. H. Franke-Whittle and H. Insam, *Crit Rev Microbiol*, 2013, **39**, 139-151.
- 519 38. S. Cashman, A. Gaglione, J. Mosley, L. Weiss, T. R. Hawkins, N. J. Ashbolt, J. Cashdollar, X.  
520 Xue, C. Ma and S. Arden, *Environmental and Cost Life Cycle Assessment of Disinfection Options*  
521 *for Municipal Wastewater Treatment*, EPA, 2014.
- 522 39. K. Matyjaszewski and T. P. Davis, 2002.
- 523 40. O. Braun, C. Coquery, J. Kieffer, F. Blondel, C. Favero, C. Besset, J. Mesnager, F. Voelker, C.  
524 Delorme and D. Matioszek, *Molecules*, 2021, **27**.
- 525 41. P. Van den Heede, A. Mignon, G. Habert and N. De Belie, *Cement and Concrete Composites*,  
526 2018, **94**, 166-180.
- 527 42. Y. Fu, T. Chen, S. H. Y. Chen, B. Liu, P. Sun, H. Sun and F. Chen, *Trends in Food Science &*  
528 *Technology*, 2021, **112**, 188-200.
- 529 43. W. Saerens, S. Smetana, L. Van Campenhout, V. Lammers and V. Heinz, *Journal of Cleaner*  
530 *Production*, 2021, **306**, 127177.
- 531 44. S. Smetana, personal communication.
- 532 45. É. G. Castanheira and F. Freire, *Journal of Cleaner Production*, 2013, **54**, 49-60.
- 533 46. V. P. P. Esteves, E. M. M. Esteves, D. J. Bungenstab, D. G. d. S. W. Loebmann, D. de Castro  
534 Victoria, L. E. Vicente, O. de Queiroz Fernandes Araújo and C. do Rosário Vaz Morgado, *Clean*  
535 *Technologies and Environmental Policy*, 2016, **18**, 1655-1673.
- 536 47. U. S. EPA, *Renewable Fuel Standard Program (RFS2) Regulatory Impact Analysis*, 2010.
- 537 48. T. D. Searchinger and R. E. Heimlich, *Estimating greenhouse gas emissions from soy-based US*  
538 *biodiesel when factoring in emissions from land use change*, 2008.
- 539 49. E. Audsley, M. Brander, J. C. Chatterton, D. Murphy-Bokern, C. Webster and A. G. Williams,  
540 2010.
- 541 50. A. Flysjö, C. Cederberg, M. Henriksson and S. Ledgard, *Journal of cleaner production*, 2012, **28**,  
542 134-142.
- 543 51. J. Schmidt, J. Reinhard and B. Weidema, *Report v2*, 2011, **2**.

- 544 52. D. Caro, S. J. Davis, E. Kebreab and F. Mitloehner, *Journal of Cleaner Production*, 2018, **172**,  
545 2646-2654.
- 546 53. T. C. Ponsioen and T. J. Blonk, *Journal of Cleaner Production*, 2012, **28**, 120-126.
- 547 54. L. Y. Batan, G. D. Graff and T. H. Bradley, *Bioresource technology*, 2016, **219**, 45-52.
- 548 55. C. M. Beal, L. N. Gerber, D. L. Sills, M. E. Huntley, S. C. Machesky, M. J. Walsh, J. W. Tester, I.  
549 Archibald, J. Granados and C. H. Greene, *Algal Research*, 2015, **10**, 266-279.
- 550 56. E. Gnansounou and J. K. Raman, *Applied energy*, 2016, **161**, 300-308.

551
