# Supplementary material for: Saline microalgae cultivation for the coproduction of biofuel and protein in the United States: an integrated assessment of costs, carbon, water, and land impacts
Source: Royal Society of Chemistry journal article supplement (doi:10.1039/d4se01423e), 2025-01-01
Supplement: d4se01423e2.xlsx [file d4se01423e2.xlsx]

## Sheet: Notes 1
Black text in "Notes"	Explanation
Blue text in "Notes"	Calculation equation
Name	Notes
Site_ID	Site ID
Lon	Longitude
Lat	Latitude
Pond area (ha)
TDS	Total Dissolved Solids (mg/L)
Biomass_pro	Biomass productivity (g/m2/day)
Longterm_annual_biomass	Long term annual biomass productivity (g/m2/day)
Biomass_yield	Biomass yield (MM tonne/yr, AFDW basis)
Well_depth (ft)
DO (mg/L)	Dissolved oxygen
pH of saline groundwater
Water temperature (oC)
CO2 source distance
CO2 source type
Evaporation loss (L/yr)
Aquafer source name
State
Correction_factor	Correction factor is defined as a function of TDS
CF_FW	Annual county-level freshwater characterization factor is sourced from AWARE-US
CF_SW	Saline water characterization factor is equal to freshwater characterization factor times correction factor
TEA_fuel	MFSP stands for "minimum fuel selling price". MFSP_fuel indicates the MFSP for fuel only scenario ($/GGE).
TEA_whey_soy	MFSP for fuel plus protein concentrate (PC) production for either whey PC or soy PC ($/GGE)
TEA_chicken	MFSP for fuel plus PC production for chicken meat alternative ($/GGE)
Biorefinery_TEA_whey_soy	Biorefinery-level MFSP for fuel plus PC production for either whey PC or soy PC ($/[GGE+5.9 kg PC])
Biorefinery_TEA_chicken	Biorefinery-level MFSP for fuel plus PC production for chicken meat alternative ($/[GGE+5.9 kg PC])
GHG_biomass	Greenhouse gas (GHG) emissions for AFDW biomass production (kg CO2-eq. per ton AFDW)
GHG_fuel	GHG emissions for fuel only scenario (g/MJ)
GHG_disp_soy	GHG emissions for fuel plus PC production for soy PC by using diplacement method (g/MJ)
GHG_disp_whey	GHG emissions for fuel plus PC production for whey PC by using diplacement method (g/MJ)
GHG_disp_chicken	GHG emissions for fuel plus PC production for chicken meat alternative by using diplacement method (g/MJ)
GHG_mass_alloc	GHG emissions for fuel plus PC production with mass allocation method (g/MJ)
GHG_price_soy	GHG emissions for fuel plus PC production with soy PC price allocation (g/MJ)
GHG_price_whey	GHG emissions for fuel plus PC production with whey PC price allocation (g/MJ)
GHG_price_chicken	GHG emissons for fuel plus PC production with chicken meat price allocation (g/MJ)
Biorefinery_GHG_soy_whey	Biorefinery-level GHG emissions of fuel plus PC production for either soy PC or whey PC (g/[MJ+0.05kg PC])
Biorefinery_GHG_chicken	Biorefinery-level GHG emissions of fuel plus PC production for chicken meat alternative (g/[MJ+0.05kg PC])
Saline_million_m3_yr_fuel	Saline water consumption for fuel only scenario (m3/yr) (20% wt AFDW)
Saline water consumption per area_fuel (m3/m2)	Saline water consumption per area = saline water consumption/pond area
WSF_Fuel (million m3/yr)	Water scarcity footprint (WSF) for fuel only scenario.
WSF_Fuel per area (m3/m2/yr)	WSF_Fuel per area (m3/m2/yr) = WSF_Fuel (million m3/yr)/pond area (ha)×100
Fuel production_fuel (MJ/year)	Annual fuel production in MJ for fuel only scenario
Saline water consumption L per MJ (fuel)	Saline water consumption per MJ of fuel
Freshwater consumption_fuel (L/MJ)	Freshwater consumption per MJ of fuel
Freshwater consumption_fuel (L/kg biomass)	Freshwater consumption per kg of biomass
Saline_million_m3_yr_PC_fuel	Saline water consumption for fuel and PC coproduction scenario (m3/yr) (10% wt AFDW)
Saline water consumption per area_PC_fuel (m3/m2)	Saline water consumption per area_PC_fuel (m3/m2) = Saline_million_m3_yr_PC_fuel/pond area (ha) × 100
WSF_PC_fuel (million m3/yr)	Water scarcity footprint (WSF) for fuel and PC production for soybean/whey PC
WSF_PC_Fuel_per_area (m3/m2/yr)	WSF_PC_Fuel_per_area (m3/m2/yr) = WSF_PC_fuel (million m3/yr)/Pond area (ha) × 100
WSF_chick_fuel (million m3/yr)	Water scarcity footprint (WSF) for fuel and PC production for chicken meat
WSF_chick_Fuel_per_area (m3/m2/yr)	WSF_PC_Fuel_per_area (m3/m2/yr) = WSF_PC_fuel (million m3/yr)/Pond area (ha) × 100
Fuel production_PC_fuel (MJ/year)	Annual fuel production in MJ for fuel and PC coproduction scenario
Saline water consumption L per MJ (fuel_PC)	Saline water consumption per MJ of fuel
Freshwater consumption_PC_fuel (L/MJ, w/o credits)	Freshwater consumption per MJ of fuel for fuel and PC coproduction scenario without taking any credits from PC coproduct
Freshwater consumption_PC_fuel (L/kg biomass, w/o credits)	Freshwater consumption (L/kg biomass, w/o credits) = Freshwater consumption_PC_fuel (L/MJ, w/o credits)×Fuel production_PC_fuel/Biomass_yield

## Sheet: Data
Site_ID	Lon	Lat	Pond area (ha)	TDS	Biomass_pro	Longterm_annual_biomass	Biomass_yield	Well_depth (ft)	DO (mg/L)	pH of saline groundwater	Water temperature (oC)	CO2 source distance	CO2 source type	Evaporation loss (L/yr)	Aquafer source name	State	Correction_factor	CF_FW	TEA_fuel	TEA_whey_soy	TEA_chicken	Biorefinery_TEA_whey_soy	Biorefinery_TEA_chicken	GHG_biomass	GHG_fuel	GHG_disp_soy	GHG_disp_whey	GHG_disp_chicken	GHG_mass_alloc	GHG_price_soy	GHG_price_whey	GHG_price_chicken	Biorefinery_GHG_soy_whey	Biorefinery_GHG_chicken	Saline_million_m3_yr_fuel	Saline water consumption per area_fuel (m3/m2)	WSF_Fuel (million m3/yr)	WSF_Fuel per area (m3/m2/yr)	Fuel production_fuel (MJ/year)	Saline water consumption L per MJ (fuel)	Freshwater consumption_fuel (L/MJ)	Freshwater consumption_fuel (L/kg biomass)	Saline_million_m3_yr_PC_fuel	Saline water consumption per area_PC_fuel (m3/m2)	WSF_PC_fuel (million m3/yr)	WSF_PC_Fuel_per_area (m3/m2/yr)	WSF_chick_fuel (million m3/yr)	WSF_chick_Fuel_per_area (m3/m2/yr)	Fuel production_PC_fuel (MJ/year)
2993	-80.5	25.56	4472.72	5597.18	33.5388	35.2157	0.548811	74	0	0	0	15.5717	Electricity Generation	7.55026e+10	MIDULLA GENERATING STATION	FL	0.128572	0.626237	6.72199	0.282023	-1.9903	13.652	25.9052	1127.81	77.8746	163.492	-397.349	21.4987	56.0601	64.1432	34.4584	41.1298	190.732	223.134	79.7336	1.78266	10.5025	2.34813	6.27641e+09	12.7037	0.212977	0.243568	82.4337	1.84303	10.8834	0.243329	13.3298	0.298025	3.37042e+09
2291	-80.4	27.06	6546.35	2240	31.8313	33.4228	0.763524	83	0	7.1	25	6.89272	Stationary Combustion	1.11725e+11	GUADALUPE GENERATING STATION	TX	0.0470874	0.725088	6.72196	0.290606	-1.98648	13.6606	25.9091	1126.57	77.8889	150.329	-410.497	8.33494	55.9838	73.9406	34.6491	45.4281	177.568	209.97	117.793	1.79937	5.95087	0.909035	8.73194e+09	13.4899	0.214061	0.244808	121.567	1.85701	6.18305	0.0944503	10.125	0.154666	4.69048e+09
1620	-80.9	28.19	9808.19	6217.17	30.9609	32.5089	1.10336	240	0	0	0	7.53513	Electricity Generation	1.83526e+11	COTTONWOOD ENERGY PROJECT	TX	0.143621	0.605994	6.82145	0.481606	-1.79976	13.8516	26.0958	1151.85	80.0594	168.164	-392.636	26.1707	57.7273	76.0876	35.1733	46.3662	195.404	227.806	191.916	1.95669	28.0513	2.85999	1.26185e+10	15.2091	0.226293	0.258797	197.366	2.01225	28.8996	0.294648	33.6584	0.343166	6.7752e+09
1619	-81	28.19	5195.62	2080	31.1058	32.6611	0.590218	240	0	0	0	6.28165	Electricity Generation	9.58806e+10	COTTONWOOD ENERGY PROJECT	TX	0.0432039	0.605994	6.98095	0.713062	-1.5604	14.0831	26.3351	1142.83	79.346	166.75	-394.051	24.7564	57.1061	75.3853	35.0193	46.058	193.989	226.391	100.582	1.93591	4.60674	0.886659	6.74995e+09	14.9012	0.222838	0.254845	103.508	1.99221	4.76834	0.0917762	7.31506	0.140793	3.62584e+09
3027	-97.8	26.44	7357.53	2236	28.9214	30.3675	0.776095	22	0	8.2	0	30.1562	Electricity Generation	1.43145e+11	J T DEELY	TX	0.0469903	6.29155	7.13431	0.983052	-1.29424	14.3531	26.6013	1131.88	78.4825	169.068	-391.723	27.0748	56.3267	74.2349	34.7583	45.5513	196.308	228.71	149.303	2.02926	10.5816	1.4382	8.87571e+09	16.8216	0.219632	0.251179	153.153	2.08159	11.2431	0.15281	46.0093	0.625336	4.76755e+09
1786	-81.1	28.06	6490.21	2080	28.8014	30.2414	0.683574	240	0	0	0	18.6867	Electricity Generation	1.03823e+11	COTTONWOOD ENERGY PROJECT	TX	0.0432039	0.605994	7.12437	0.996523	-1.27907	14.3665	26.6165	1142.7	79.336	166.656	-394.141	24.6626	57.0849	75.457	35.0081	46.0888	193.896	226.297	109.276	1.6837	5.02365	0.774036	7.81761e+09	13.9782	0.222464	0.254418	112.665	1.73593	5.21087	0.0802882	8.16044	0.125735	4.19938e+09
1623	-80.9	28.31	4622.57	6217.17	30.8909	32.4354	0.518854	553	0	7.2	25	17.434	Stationary Combustion	8.58038e+10	WILLOW GLEN	LA	0.143621	0.605994	7.19536	1.09273	-1.17869	14.4627	26.7168	1179.47	82.3002	172.48	-388.32	30.4865	59.6237	78.3012	35.9379	47.3379	199.719	232.121	89.751	1.94158	13.1197	2.83818	5.9338e+09	15.1254	0.238221	0.272438	92.3138	1.99702	13.5186	0.292448	15.7564	0.340858	3.18603e+09
3034	-98.5	26.31	10733.2	3289.48	28.3661	29.7844	1.10752	148	6.8	7.4	29.5	17.8852	Electricity Generation	2.51536e+11	MANATEE	FL	0.0725601	100	7.20136	1.12738	-1.15403	14.4974	26.7415	1154.79	80.4063	165.196	-395.591	23.2028	57.9199	76.1596	35.2403	46.3954	192.436	224.838	260.137	2.42367	99.7545	9.294	1.2666e+10	20.5382	0.232418	0.265802	265.628	2.47483	111.037	1.03452	899.465	8.38021	6.80233e+09
2429	-81.5	27.06	5980.02	2670	29.5372	31.0141	0.646864	1310	0	7.8	32.2	31.9411	Stationary Combustion	9.68295e+10	POLK	FL	0.0575243	0.746874	7.21185	1.1291	-1.14572	14.4991	26.7498	1223.25	85.7798	188.394	-372.419	46.4003	62.6303	82.2133	37.0872	49.0577	215.633	248.035	101.953	1.70489	6.21758	1.03973	7.39777e+09	13.7816	0.256719	0.293593	105.153	1.75841	6.44921	0.107846	9.88906	0.165368	3.97364e+09
3059	-98	26.56	10270.2	2082	28.3908	29.8103	1.06297	782	0	0	0	21.3764	Electricity Generation	2.14137e+11	J T DEELY	TX	0.0432524	100	7.26293	1.22586	-1.05512	14.5959	26.8404	1211.5	85.0567	169.766	-391.021	27.7723	61.8301	80.2855	36.6871	48.2066	197.005	229.407	222.572	2.16716	87.2522	8.49564	1.21565e+10	18.309	0.255895	0.292651	227.849	2.21854	97.9422	0.953652	854.785	8.32294	6.52983e+09
3035	-98.4	26.31	8594.67	3441.03	28.3405	29.7575	0.885838	200	10.7	7.5	19.3	8.13399	Electricity Generation	2.03729e+11	MANATEE	FL	0.0762385	100	7.27578	1.25359	-1.02534	14.6236	26.8702	1161.59	80.9748	165.039	-395.749	23.0449	58.3991	76.4746	35.3282	46.5338	192.278	224.68	210.587	2.4502	80.745	9.39477	1.01308e+10	20.7868	0.2356	0.269441	214.978	2.50129	89.7838	1.04464	720.385	8.38176	5.44065e+09
3077	-97.9	26.69	11731.8	2249.29	28.4191	29.84	1.21522	1015	0	7.82	29.2	32.6915	Electricity Generation	2.39684e+11	J T DEELY	TX	0.0473128	4.75327	7.27594	1.27737	-1.00498	14.6474	26.8906	1233.51	86.8357	177.578	-383.21	35.584	63.3379	82.1581	34.4112	49.0289	204.817	237.219	249.311	2.1251	16.0138	1.365	1.38977e+10	17.939	0.265083	0.303159	255.342	2.1765	16.8676	0.143777	57.9945	0.494338	7.465e+09
3060	-97.9	26.56	10614.1	2308	28.4971	29.9219	1.10277	1090	0	7.9	0	31.3	Electricity Generation	2.1455e+11	J T DEELY	TX	0.0487379	6.29155	7.28388	1.27897	-1.0024	14.649	26.8931	1239.06	87.2819	171.087	-389.702	29.0932	63.7226	83.1056	37.346	49.4451	198.326	230.728	223.282	2.10363	15.949	1.50262	1.26117e+10	17.7044	0.267326	0.305724	228.754	2.15518	16.8984	0.159207	66.2976	0.624616	6.7742e+09
3061	-97.8	26.56	11960.5	5382	29.0624	30.5155	1.26187	1380	0	7.99	32.7	40.2246	Electricity Generation	2.38357e+11	J T DEELY	TX	0.12335	6.29155	7.28186	1.28964	-0.993071	14.6596	26.9025	1273.74	90.0677	168.698	-392.093	26.7039	66.1068	85.2065	35.0138	50.3677	195.937	228.339	247.975	2.07329	36.3853	3.04213	1.44312e+10	17.1833	0.281286	0.321689	254.218	2.12549	37.9343	0.317165	94.4407	0.789608	7.74883e+09
2886	-97.3	27.56	4030.35	5852.07	30.1233	31.6294	0.439928	55	0	7.2	0	3.8137	Electricity Generation	7.3978e+10	O W SOMMERS	TX	0.134759	5.00596	7.33514	1.34959	-0.918983	14.7196	26.9766	1136.79	78.9294	172.541	-388.242	30.5478	56.6918	74.814	34.7575	45.804	199.781	232.183	77.3438	1.91903	12.031	2.9851	5.03117e+09	15.3729	0.220213	0.251843	79.5216	1.97307	12.5406	0.311153	28.215	0.700062	2.70147e+09
2263	-80.3	27.06	2587.23	2390	32.4963	34.1211	0.307832	1320	0	7.4	29.1	12.8048	Stationary Combustion	4.61839e+10	GUADALUPE GENERATING STATION	TX	0.0507282	0.725088	7.36343	1.37464	-0.88671	14.7446	27.0088	1220.49	85.5174	144.202	-416.623	2.20839	62.4598	81.0431	36.9436	48.546	171.441	203.843	48.6264	1.87948	2.62973	1.01643	3.52048e+09	13.8124	0.254958	0.291579	50.1477	1.93828	2.72887	0.105475	4.31813	0.166902	1.89104e+09
3232	-97.8	27.69	4604.01	2586.83	27.2639	28.6271	0.456583	709	2.1	8.2	20.5	3.01827	Stationary Combustion	9.72256e+10	WILCOX GAS PLANT	TX	0.0555056	2.8746	7.40651	1.43693	-0.832314	14.8069	27.0632	1021.54	75.3743	178.069	-382.708	36.0752	53.4037	71.987	34.9725	44.5617	205.308	237.71	100.823	2.18989	6.5547	1.42369	5.22165e+09	19.3086	0.241778	0.276506	103.091	2.23915	6.80969	0.147908	16.1541	0.350871	2.8046e+09
3090	-98	26.81	15580.8	4375	27.7364	29.1233	1.56782	552	0	7.05	29.5	31.8616	Electricity Generation	3.57778e+11	J T DEELY	TX	0.0989078	5.01627	7.36454	1.43709	-0.847574	14.8071	27.048	1207.43	84.7448	187.269	-373.512	45.2754	61.5388	79.8695	36.5525	48.023	214.508	246.91	369.755	2.37314	42.315	2.71583	1.79301e+10	20.622	0.255444	0.292135	377.527	2.42302	43.8556	0.281471	99.8345	0.640751	9.62807e+09
2043	-98.1	28.56	5801.16	3250	25.9677	27.2661	0.546363	60	0	7.28	24.4	12.9943	Stationary Combustion	1.25542e+11	EQUISTAR CHEMICALS LAPORTE COMPLEX	TX	0.0716019	12.3906	7.43888	1.50633	-0.765932	14.8763	27.1296	988.153	71.7543	209.392	-351.367	67.3984	50.337	67.0743	31.8304	42.402	236.631	269.033	129.799	2.23746	14.2376	2.45426	6.2484e+09	20.7731	0.217567	0.248818	132.516	2.2843	15.0975	0.260249	63.2905	1.091	3.35574e+09
3062	-97.6	26.56	6454.45	3282.59	29.1147	30.5705	0.684332	1500	0	8.13	26.3	48.3871	Electricity Generation	1.23506e+11	J T DEELY	TX	0.0723929	6.29155	7.42771	1.52817	-0.747441	14.8982	27.1481	1270.06	89.7561	169.612	-391.179	27.6183	65.8449	84.6825	38.0437	50.1377	196.851	229.253	128.875	1.99668	12.4738	1.93259	7.82627e+09	16.467	0.279462	0.319602	132.267	2.04924	13.1427	0.203623	43.7949	0.678523	4.20339e+09
2280	-80.5	27.06	2095.84	2390	30.4985	32.0235	0.234251	83	0	7.1	25	1.62487	Stationary Combustion	3.26486e+10	GUADALUPE GENERATING STATION	TX	0.0507282	0.725088	7.53038	1.5953	-0.659365	14.9653	27.2362	1126.43	77.913	178.772	-382.047	36.7786	55.9794	74.1256	34.0463	45.5082	206.012	238.413	34.5108	1.64663	1.8747	0.894488	2.67898e+09	12.8821	0.213941	0.244671	35.6691	1.7019	1.95019	0.0930503	3.15958	0.150755	1.43904e+09
2352	-80.4	26.94	1974.61	2240	30.9367	32.4835	0.223865	83	0	7.1	25	9.83097	Stationary Combustion	3.31527e+10	GUADALUPE GENERATING STATION	TX	0.0470874	0.719073	7.55151	1.64972	-0.603725	15.0197	27.2918	1127.68	77.9961	166.31	-394.512	24.3164	56.0573	74.0605	34.6225	45.4801	193.549	225.951	34.932	1.76906	1.76241	0.892537	2.5602e+09	13.6442	0.214875	0.245739	36.0388	1.82511	1.83038	0.0926956	2.97657	0.150742	1.37524e+09
3046	-98.1	26.44	7562.23	2698	28.2314	29.6429	0.777468	1300	0	0	0	6.81597	Electricity Generation	1.70405e+11	J T DEELY	TX	0.0582039	100	7.51829	1.65804	-0.619276	15.028	27.2763	1280.46	90.7574	168.686	-392.101	26.692	66.6043	85.8346	38.3948	50.6428	195.925	228.327	176.505	2.33404	67.0495	8.86636	8.89141e+09	19.8512	0.287381	0.328659	180.362	2.38504	74.9201	0.990714	628.435	8.31018	4.77557e+09
2948	-99.3	27.44	7914	4708.54	27.528	28.9044	0.78827	302	1.1	8.1	30.5	22.9235	Stationary Combustion	1.99649e+11	J K SPRUCE	TX	0.107004	10.3795	7.53613	1.67163	-0.605854	15.0416	27.2897	1186.18	83.0707	181.279	-379.491	39.2851	60.0815	78.4671	35.9624	47.4053	208.518	240.92	205.596	2.59788	27.9745	3.53482	9.01494e+09	22.8062	0.247946	0.28356	209.507	2.6473	29.1955	0.368909	87.4274	1.10472	4.84038e+09
2303	-80.3	27.06	1945.93	2390	32.4963	34.1211	0.231529	1320	0	7.4	29.1	11.4697	Stationary Combustion	3.47362e+10	GUADALUPE GENERATING STATION	TX	0.0507282	0.725088	7.58336	1.67175	-0.582604	15.0417	27.3129	1220.45	85.515	170.839	-389.986	28.8456	62.4577	81.0414	33.6769	48.5453	198.079	230.48	36.5733	1.87948	1.97789	1.01643	2.64785e+09	13.8124	0.254946	0.291565	37.7175	1.93828	2.05246	0.105475	3.24779	0.166902	1.42231e+09
2703	-99.1	28.56	11496.6	4529	26.4519	27.7745	1.10045	145	0	7.4	28	30.0585	Electricity Generation	2.50066e+11	W A PARISH	TX	0.102646	13.6732	7.51704	1.6758	-0.605541	15.0458	27.29	1160.75	81.0195	180.026	-380.732	38.0322	58.3188	76.4338	35.4033	46.5106	207.265	239.667	258.477	2.24828	37.5197	3.26353	1.25852e+10	20.5382	0.235533	0.269364	263.945	2.29584	39.5577	0.34408	146.656	1.27564	6.75783e+09
2526	-81.6	26.94	2879.83	2670	29.7239	31.21	0.31368	1310	0	7.8	32.2	23.1301	Stationary Combustion	4.58567e+10	POLK	FL	0.0575243	0.61676	7.57944	1.72227	-0.539502	15.0923	27.356	1219.73	85.4773	178.977	-381.839	36.9838	62.3964	82.1063	36.8307	49.0113	206.217	238.619	48.3415	1.67862	2.92209	1.01467	3.58735e+09	13.4755	0.254907	0.291521	49.8927	1.73249	3.03036	0.105227	4.40784	0.153059	1.92692e+09
2374	-97.5	28.06	2674.54	2530	27.3088	28.6743	0.26565	60	0	7.2	0	23.645	Petroleum and Natural Gas Systems	5.1735e+10	COPANO PROCESSING HOUSTON CENTRAL GAS PLT	TX	0.0541262	3.3567	7.62763	1.74952	-0.508362	15.1195	27.3872	949.15	69.4088	164.037	-396.736	22.0437	48.3869	64.7569	31.5642	41.3871	191.277	223.679	53.8368	2.01293	3.56517	1.333	3.03807e+09	17.7207	0.208744	0.238728	55.1569	2.0623	3.72435	0.139252	10.0731	0.376629	1.63182e+09
3247	-97.4	26.31	2700.3	2015.07	30.9998	32.5498	0.305281	26	2.3	7.5	20.3	35.4231	Stationary Combustion	4.84431e+10	VANDOLAH POWER PROJECT	FL	0.0416279	42.8054	7.58858	1.75211	-0.509055	15.1221	27.3865	1126.85	78.0248	150.309	-410.488	8.31583	55.9738	73.8081	34.4656	45.365	177.549	209.951	50.8796	1.88422	11.661	4.31839	3.4913e+09	14.5733	0.215314	0.246241	52.3934	1.94028	13.0105	0.481818	106.057	3.92761	1.87542e+09
2354	-80.4	27.06	1711.32	2240	31.8313	33.4228	0.199598	83	0	7.1	25	5.38783	Stationary Combustion	2.92066e+10	GUADALUPE GENERATING STATION	TX	0.0470874	0.725088	7.57051	1.78242	-0.467777	15.1524	27.4278	1126.53	77.8875	181.526	-379.299	39.5325	55.9825	74.2437	34.52	45.5612	208.766	241.167	30.7931	1.79937	1.55565	0.909036	2.28267e+09	13.4899	0.214053	0.244799	31.7795	1.85701	1.61635	0.0944503	2.64684	0.154666	1.22617e+09
1307	-82	28.69	2670.88	2510	27.858	29.2509	0.271703	240	0.2	7.3	24.5	4.30606	Lime Manufacturing	4.1517e+10	CHEMICAL LIME LTD MARBLE FALLS PLANT	TX	0.0536408	1.42397	7.61551	1.79373	-0.464702	15.1637	27.4308	1046.11	74.4899	156.2	-404.587	14.2061	52.8405	65.9014	32.3991	41.8919	183.439	215.841	43.6777	1.63533	2.62545	0.982988	3.10729e+09	14.0565	0.215657	0.246633	45.0262	1.68582	2.73585	0.102433	5.49059	0.205572	1.66907e+09
1404	-81	28.44	2776.09	8220	30.9544	32.5021	0.311606	1357	0	7.9	22.3	15.49	Stationary Combustion	4.85788e+10	WILLOW GLEN	LA	0.192233	0.634258	7.62158	1.81543	-0.44618	15.1854	27.4494	1247.37	87.8075	183.142	-377.657	41.148	64.3116	83.2837	37.5513	49.525	210.381	242.783	50.9055	1.83371	9.93006	3.57699	3.56364e+09	14.2847	0.266845	0.305174	52.4422	1.88907	10.2448	0.369037	11.6512	0.419697	1.91305e+09
2763	-100	28.94	14274.8	3921	25.8916	27.1862	1.33705	150	0	7.2	26.5	64.5336	Electricity Generation	3.11518e+11	W A PARISH	TX	0.0878883	9.53079	7.60097	1.83567	-0.447581	15.2057	27.448	1163.35	81.2523	214.133	-346.615	72.1392	58.4641	76.8006	35.3649	46.6697	241.372	273.774	321.833	2.25456	37.5913	2.63341	1.5291e+10	21.0473	0.237282	0.271364	328.488	2.30118	39.4276	0.276205	130.136	0.911651	8.21134e+09
2847	-81.5	26.69	2485.89	2077.07	29.895	31.3897	0.272721	1300	0	0	0	20.4534	Stationary Combustion	3.88809e+10	POLK	FL	0.0431327	0.722936	7.63736	1.85	-0.408518	15.22	27.487	1214.11	84.9946	181.178	-379.644	39.1839	62.0115	81.1364	33.9734	48.5864	208.417	240.819	41.0526	1.65143	1.91469	0.770224	3.11893e+09	13.1624	0.252211	0.288438	42.4012	1.70568	1.99227	0.0801433	3.39613	0.136616	1.67541e+09
2762	-100.1	28.94	10519.4	2630.92	25.8045	27.0948	0.984274	85	0	7.27	26	75.2676	Electricity Generation	2.32398e+11	W A PARISH	TX	0.0565757	9.53079	7.63523	1.86105	-0.41909	15.231	27.4764	1153.5	80.4346	202.511	-358.237	60.5176	57.7732	75.968	35.2071	46.3044	229.751	262.153	240.14	2.28283	20.4367	1.94276	1.12565e+10	21.3335	0.233381	0.266903	245.045	2.32945	21.6367	0.205683	88.4231	0.840569	6.04581e+09
2764	-99.9	28.94	13808.4	2834.82	25.7535	27.0412	1.2891	269	2.6	7.5	28.8	58.3659	Electricity Generation	3.0037e+11	W A PARISH	TX	0.0615248	9.53079	7.6256	1.86899	-0.413922	15.239	27.4816	1174.74	82.2019	168.602	-392.147	26.608	59.2564	77.7131	35.7483	47.0705	195.841	228.243	310.484	2.24852	28.0747	2.03316	1.47426e+10	21.0603	0.242594	0.277439	316.906	2.29503	29.6778	0.214926	117.145	0.848367	7.91799e+09
2770	-99.6	28.94	9873.31	3599.47	25.7028	26.988	0.918656	60	0	7.1	23	39.6288	Electricity Generation	2.16156e+11	W A PARISH	TX	0.0800841	9.53079	7.66688	1.91756	-0.361792	15.2876	27.5337	1151.37	80.2971	171.016	-389.732	29.0223	57.6625	75.7343	35.3813	46.2017	198.255	230.657	223.275	2.26139	24.2747	2.45861	1.05061e+10	21.2519	0.232397	0.265778	227.848	2.30772	25.501	0.258282	87.8271	0.889541	5.64205e+09
3023	-97.8	26.31	2732.79	3616	29.0043	30.4546	0.288649	18	0	6.53	24.6	29.302	Electricity Generation	5.14302e+10	J T DEELY	TX	0.0804854	42.8054	7.66597	1.92172	-0.338149	15.2917	27.5574	1132.96	78.5528	184.901	-375.893	42.907	56.4022	74.169	34.6255	45.5227	212.14	244.542	53.6864	1.96453	13.344	4.88293	3.30109e+09	16.2632	0.219391	0.250903	55.1164	2.01686	14.6737	0.536949	102.635	3.75568	1.77292e+09
2301	-81.9	27.31	2401.83	2460	29.3075	30.7729	0.257806	240	0	6.9	31	8.1024	Electricity Generation	3.74604e+10	ORANGE COGENERATION FACILITY	FL	0.0524272	0.795302	7.7262	1.94651	-0.310622	15.3165	27.5849	1140.36	79.0885	207.822	-352.988	65.8283	56.9339	75.0949	34.9575	45.9321	235.061	267.463	39.5085	1.64493	2.22105	0.92473	2.94837e+09	13.4001	0.22074	0.252446	40.7846	1.69806	2.30813	0.0960989	3.76801	0.156881	1.58372e+09
2780	-100.1	29.06	14488.1	2630.92	25.337	26.6038	1.33097	85	0	7.27	26	82.5209	Electricity Generation	3.21245e+11	W A PARISH	TX	0.0565757	9.53079	7.66528	1.94702	-0.336197	15.317	27.5593	1155.35	80.5904	223.801	-336.946	81.8069	57.8939	76.118	35.2336	46.3699	251.04	283.442	331.706	2.28951	28.0301	1.9347	1.52215e+10	21.792	0.234594	0.26829	338.34	2.33529	29.6528	0.20467	119.963	0.828012	8.17532e+09
2475	-97.5	28.06	2451.53	2530	27.3088	28.6743	0.243499	60	0	7.2	0	25.6824	Petroleum and Natural Gas Systems	4.74211e+10	COPANO PROCESSING HOUSTON CENTRAL GAS PLT	TX	0.0541262	3.3567	7.70589	1.95919	-0.296488	15.3292	27.5991	949.235	69.4132	179.203	-381.571	37.2092	48.3907	64.7616	31.5934	41.3892	206.442	238.844	49.3476	2.01293	3.26789	1.333	2.78474e+09	17.7207	0.208768	0.238755	50.5577	2.0623	3.4138	0.139252	9.23317	0.376629	1.49575e+09
2487	-80.3	26.81	1445.7	2850	32.1759	33.7848	0.170287	56	0	8.2	25.1	6.20128	Electricity Generation	2.59212e+10	HINES ENERGY COMPLEX	FL	0.0618932	0.719073	7.6823	1.97402	-0.271299	15.344	27.6242	1126.1	77.8509	148.173	-412.653	6.17925	55.952	74.0159	34.4895	45.4611	175.412	207.814	27.2658	1.88599	1.77699	1.22915	1.94746e+09	14.0007	0.214114	0.244868	28.1069	1.94417	1.8411	0.12735	2.71291	0.187654	1.04604e+09
2044	-98	28.56	3578.78	2580	25.7637	27.0518	0.334901	230	0	7.7	0	8.49729	Stationary Combustion	7.3497e+10	EQUISTAR CHEMICALS LAPORTE COMPLEX	TX	0.0553398	3.09737	7.7381	1.99943	-0.263765	15.3694	27.6318	1004.29	73.088	152.629	-408.131	10.6353	51.4551	71.507	32.2747	44.348	179.868	212.27	76.1375	2.12747	4.97095	1.38901	3.83005e+09	19.879	0.224153	0.25635	77.8042	2.17404	5.16522	0.144329	12.5504	0.35069	2.05715e+09
3012	-98	26.44	3148.36	2063.29	28.3753	29.794	0.325731	361	0.6	8	20.7	12.7355	Electricity Generation	6.73085e+10	J T DEELY	TX	0.0427983	100	7.72803	2.00978	-0.252821	15.3798	27.6427	1169.85	81.6484	180.413	-380.375	38.419	58.9647	77.5476	35.6864	47.0049	207.652	240.054	69.8917	2.21994	26.7784	8.50551	3.72518e+09	18.762	0.238017	0.272204	71.5084	2.27129	30.0534	0.954574	261.976	8.32105	2.00097e+09
2353	-80.5	27.06	1659.13	2390	30.4985	32.0235	0.18544	83	0	7.1	25	2.90676	Stationary Combustion	2.58456e+10	GUADALUPE GENERATING STATION	TX	0.0507282	0.725088	7.7414	2.03159	-0.216413	15.4016	27.6791	1126.49	77.9162	156.874	-403.945	14.8806	55.9822	64.3372	34.6029	41.2111	184.114	216.515	27.3197	1.64663	1.48407	0.894488	2.12076e+09	12.8821	0.213958	0.244691	28.2367	1.7019	1.54382	0.0930503	2.50121	0.150755	1.13918e+09
2979	-81.5	26.06	1668	3675.24	30.6958	32.2306	0.187933	200	0	0	0	57.3016	Stationary Combustion	2.51221e+10	POLK	FL	0.0819234	0.607739	7.7558	2.0542	-0.194206	15.4242	27.7013	1136.48	78.5804	168.019	-392.814	26.0258	56.617	74.7012	34.7208	45.7633	195.259	227.661	26.5985	1.59463	2.26244	1.35638	2.14927e+09	12.3756	0.217224	0.248425	27.5255	1.65021	2.34962	0.140864	3.16276	0.189614	1.15437e+09
1180	-96.9	29.94	5455.1	2465	24.7045	25.9397	0.488519	68	0	7.7	0	11.304	Stationary Combustion	9.76235e+10	NANSEN SPAR, EAST BREAKS 602 PLATFORM "A"	TX	0.0525485	2.20409	7.76821	2.05771	-0.212703	15.4277	27.6828	954.062	69.9966	146.248	-414.488	4.25398	48.7383	65.2629	31.7169	41.6025	173.487	205.889	101.504	1.86072	6.12022	1.12193	5.58688e+09	18.1684	0.212525	0.243052	103.943	1.90542	6.35428	0.116483	14.0204	0.257015	3.00085e+09
2702	-99.3	28.56	5608.33	2430	26.3974	27.7173	0.537472	252	0	7.9	27.8	31.9772	Electricity Generation	1.2201e+11	W A PARISH	TX	0.051699	13.6732	7.75177	2.05799	-0.214009	15.428	27.6815	1168.11	81.6487	170.203	-390.553	28.2096	58.8252	77.3452	35.5986	46.9105	197.443	229.844	126.254	2.25118	11.8939	2.12076	6.14673e+09	20.54	0.239296	0.273667	128.93	2.2989	12.7552	0.227433	65.0771	1.16036	3.30149e+09
2765	-99.8	28.94	8127.02	3599.47	25.724	27.0103	0.756808	197	5.7	7.9	30.2	56.9935	Electricity Generation	1.77776e+11	W A PARISH	TX	0.0800841	9.53079	7.75422	2.06422	-0.212739	15.4342	27.6828	1168.61	81.6927	204.751	-355.997	62.7576	58.8345	77.1082	35.574	46.8049	231.991	264.392	183.641	2.25964	19.9742	2.45775	8.65513e+09	21.2176	0.239826	0.274274	187.409	2.306	20.9845	0.258206	72.33	0.889995	4.64804e+09
2788	-99.6	29.06	8173.91	2214.84	25.4338	26.7055	0.754314	108	3	6.9	25.3	42.9358	Electricity Generation	1.81887e+11	W A PARISH	TX	0.0464767	9.53079	7.76045	2.07317	-0.203757	15.4432	27.6918	1155.45	80.6434	173.249	-387.499	31.2554	57.9405	76.326	35.2553	46.4615	200.488	232.89	187.854	2.29822	13.9809	1.71043	8.62661e+09	21.7761	0.234901	0.268641	191.614	2.34422	14.863	0.181834	66.0483	0.808038	4.63354e+09
1658	-98.9	29.19	7505.46	2660	25.2957	26.5605	0.688585	70	0	6.63	24	19.6986	Electricity Generation	1.47735e+11	W A PARISH	TX	0.0572816	4.10697	7.76012	2.07511	-0.200582	15.4451	27.695	1146.77	79.9577	167.668	-393.078	25.6747	57.3646	75.742	35.1123	46.2048	194.908	227.31	153.171	2.04079	10.8391	1.44416	7.8749e+09	19.4505	0.229539	0.262509	156.603	2.08652	11.3138	0.150741	31.4478	0.418999	4.22965e+09
980	-81.3	29.31	2310.98	4310	29.6906	31.1752	0.249756	240	0	0	0	31.9674	Electricity Generation	3.56863e+10	HOG BAYOU ENERGY CENTER	AL	0.0973301	0.519657	7.79849	2.10748	-0.148845	15.4775	27.7467	1143.92	79.4658	166.973	-393.811	24.9793	57.1559	75.394	35.0019	46.0588	194.212	226.614	37.6448	1.62895	3.75875	1.62647	2.8563e+09	13.1795	0.222153	0.254063	38.8828	1.68252	3.89201	0.168414	4.81596	0.208394	1.53401e+09
372	-113.5	32.69	13481.3	3880	26.0855	27.3898	1.26973	281	0	7.8	0	77.8902	Electricity Generation	3.49268e+11	Hugo	OK	0.0868932	100	7.76259	2.11875	-0.164019	15.4888	27.7315	1191.26	83.5929	174.583	-386.156	32.5893	60.3769	78.8468	36.1276	47.5665	201.822	234.224	358.969	2.66272	123.916	9.19172	1.45211e+10	24.7206	0.252379	0.288629	365.295	2.70964	136.929	1.01569	1040.69	7.71953	7.79743e+09
2791	-99.5	29.06	8383.74	4054.12	25.4489	26.7213	0.771707	216	3.9	7.5	30.4	37.6951	Electricity Generation	1.81107e+11	W A PARISH	TX	0.0911194	9.53079	7.79132	2.12171	-0.155504	15.4917	27.74	1171.7	81.9749	176.335	-384.412	34.3415	59.0675	72.6612	35.6522	44.8525	203.575	235.976	187.045	2.23104	22.4145	2.67357	8.82552e+09	21.1936	0.241245	0.275896	190.886	2.27686	23.4867	0.280145	75.8399	0.904607	4.73926e+09
379	-113.5	32.81	11034	3427.25	26.3912	27.7108	1.05187	495	0	0	25	54.6505	Electricity Generation	2.91377e+11	Hugo	OK	0.0759041	100	7.78412	2.12442	-0.156448	15.4944	27.7391	1219.65	85.9805	179.088	-381.649	37.0947	62.3596	72.9199	36.8167	44.9642	206.328	238.73	299.482	2.71418	99.5466	9.02182	1.20295e+10	24.8955	0.265314	0.303423	304.725	2.7617	110.275	0.999409	859.02	7.78522	6.45996e+09
369	-113.4	32.56	7585.72	2310	26.3326	27.6492	0.723309	150	4.9	7.6	29	70.478	Electricity Generation	2.01725e+11	Hugo	OK	0.0487864	100	7.79102	2.13463	-0.141738	15.5046	27.7538	1168.08	81.703	170.96	-389.778	28.9668	58.7846	76.9885	35.5936	46.7507	198.2	230.602	207.412	2.73424	62.94	8.29717	8.27202e+09	25.0739	0.242844	0.277725	211.021	2.78182	70.2291	0.925808	585.182	7.71427	4.44287e+09
2946	-99.3	27.31	3596.31	2382	27.9104	29.3059	0.36482	400	0	8.57	28.1	26.8746	Stationary Combustion	9.03232e+10	J K SPRUCE	TX	0.050534	10.3795	7.81573	2.1456	-0.119377	15.5156	27.7762	1189.63	83.362	163.132	-397.639	21.1385	60.3158	78.8001	36.1587	47.5518	190.372	222.773	93.1914	2.5913	7.47461	2.07841	4.17221e+09	22.3362	0.249647	0.285506	95.0048	2.64173	7.9387	0.220745	34.898	0.970381	2.24092e+09
2781	-100	29.06	9882.19	4860.1	25.4538	26.7266	0.908616	374	2.5	7.5	29.8	65.6908	Electricity Generation	2.156e+11	W A PARISH	TX	0.110682	9.53079	7.80625	2.14578	-0.13344	15.5158	27.7621	1195.28	83.8737	171.384	-389.363	29.3906	60.6661	79.0263	36.296	47.6468	198.624	231.025	222.492	2.25145	30.9499	3.13189	1.03913e+10	21.4115	0.251418	0.28753	227.011	2.29717	32.2995	0.326846	93.9337	0.950535	5.57942e+09
380	-113.4	32.81	12961.4	2015.07	25.9331	27.2298	1.21789	495	0	0	25	49.1284	Electricity Generation	3.40428e+11	Hugo	OK	0.0416279	100	7.7907	2.15715	-0.125219	15.5271	27.7703	1215.95	85.6976	178.516	-382.221	36.5223	62.1094	80.8217	34.166	48.4332	205.755	238.157	350.055	2.70076	103.511	7.98613	1.39283e+10	25.1327	0.264348	0.302318	356.134	2.74766	115.745	0.893003	982.851	7.58292	7.48114e+09
2792	-99.4	29.06	7195.81	3578.8	25.5222	26.7983	0.66492	230	4.1	7.1	30.4	29.2553	Electricity Generation	1.519e+11	W A PARISH	TX	0.0795825	39.1895	7.81393	2.16737	-0.107836	15.5374	27.7877	1170.06	81.8512	168.974	-391.773	26.9808	58.9623	77.3304	35.6553	46.9023	196.214	228.616	157.063	2.18271	31.5288	4.38155	7.60426e+09	20.6547	0.240302	0.274819	160.374	2.22872	34.3523	0.477393	219.847	3.05521	4.08374e+09
2747	-99.6	28.81	15195.9	4195	26.0515	27.3541	1.43176	1178	0	7.38	29	47.8899	Electricity Generation	3.32697e+11	W A PARISH	TX	0.0945388	9.53079	7.78593	2.168	-0.115876	15.538	27.7797	1287.16	91.451	199.916	-360.833	57.9225	67.025	86.2697	38.4774	50.8271	227.156	259.557	343.694	2.26175	42.4576	2.79401	1.63741e+10	20.9901	0.291695	0.333593	350.817	2.30863	44.4706	0.292648	141.601	0.931835	8.79269e+09
2783	-99.9	29.06	9693.93	4860.1	25.4725	26.7461	0.891795	420	4.1	7.9	26.5	57.3704	Electricity Generation	2.12236e+11	W A PARISH	TX	0.110682	9.53079	7.82094	2.18778	-0.0912251	15.5578	27.8043	1200.95	84.3544	189.029	-371.718	47.0352	61.0661	80.2829	36.4932	48.1984	216.268	248.67	219	2.25915	30.4463	3.14076	1.01989e+10	21.473	0.254007	0.290492	223.436	2.3049	31.7709	0.327741	92.264	0.951771	5.47611e+09
1310	-98	29.69	4704.56	2300	24.8375	26.0793	0.423784	20	4.6	6.9	23.2	4.92939	Stationary Combustion	8.80154e+10	NEW BRAUNFELS LIME PLANT	TX	0.0485437	1.09669	7.84589	2.1938	-0.074085	15.5638	27.8215	1041.62	74.3714	155.748	-404.992	13.7539	52.53	66.5597	31.6246	42.1725	182.987	215.389	91.3836	1.94245	4.77549	1.01508	4.84655e+09	18.8554	0.218461	0.24984	93.498	1.98739	4.92387	0.104662	8.23289	0.174998	2.60323e+09
1451	-80.9	28.31	1762.22	6217.17	30.8909	32.4354	0.197798	553	0	7.2	25	15.0164	Stationary Combustion	3.27102e+10	WILLOW GLEN	LA	0.143621	0.605994	7.86893	2.19971	-0.0502145	15.5697	27.8453	1179.39	82.2965	172.472	-388.328	30.4782	59.6205	77.8487	35.8138	47.1393	199.711	232.113	34.2149	1.94158	5.0015	2.83818	2.26209e+09	15.1254	0.238201	0.272416	35.1919	1.99703	5.15357	0.292448	6.00667	0.340859	1.21458e+09
1112	-96.8	30.06	4844.64	2501	24.7004	25.9354	0.433691	300	0	7.4	22	9.735	Stationary Combustion	8.68569e+10	NANSEN SPAR, EAST BREAKS 602 PLATFORM "A"	TX	0.0534223	2.20409	7.86031	2.20006	-0.0682545	15.5701	27.8273	977.621	71.933	149.948	-410.787	7.95482	50.3659	67.283	32.3259	42.4893	177.188	209.59	90.3008	1.86393	5.52214	1.13984	4.95985e+09	18.2064	0.222891	0.254906	92.4654	1.90861	5.73182	0.118313	12.5376	0.258792	2.66405e+09
1953	-98.1	28.69	2938.33	3076	26.0036	27.3038	0.277253	430	0	8	0	13.5947	Stationary Combustion	5.95122e+10	EQUISTAR CHEMICALS LAPORTE COMPLEX	TX	0.0673786	12.3906	7.89714	2.26094	0.00202491	15.6309	27.8976	1025.94	74.8633	167.671	-393.086	25.6777	52.9442	69.949	32.7278	43.6636	194.911	227.313	61.6854	2.09933	6.66499	2.26829	3.17076e+09	19.4544	0.233286	0.266794	63.065	2.14629	7.09568	0.241487	31.5523	1.07382	1.70294e+09
2954	-81.5	26.31	1565.33	2752.16	30.4684	31.9918	0.175089	520	0	0	0	46.7597	Stationary Combustion	2.33009e+10	POLK	FL	0.0595184	0.607739	7.86783	2.28155	0.0353341	15.6515	27.9309	1156.31	80.2256	205.983	-354.845	63.9896	57.9958	76.5674	35.3114	46.5817	233.223	265.624	24.6882	1.57719	1.54711	0.98836	2.00238e+09	12.3294	0.226067	0.258538	25.5529	1.63243	1.60905	0.102793	2.36668	0.151194	1.07557e+09
1677	-81.3	28.06	2368.57	2080	28.5815	30.0106	0.247623	1230	0.9	7.9	22.6	17.2796	Stationary Combustion	3.74803e+10	R S NELSON	LA	0.0432039	0.605994	7.89848	2.28666	0.0305454	15.6567	27.9261	1217.51	85.4187	178.463	-382.335	36.4691	62.2491	81.2973	36.7853	48.6528	205.702	238.104	39.4555	1.6658	1.81421	0.765954	2.8319e+09	13.9325	0.254995	0.291622	40.6833	1.71763	1.88203	0.0794587	2.9505	0.124569	1.52121e+09
1295	-81.6	28.69	2685.7	2510	27.7108	29.0964	0.271781	240	0	0	0	20.4912	Electricity Generation	4.2243e+10	SANTA ROSA ENERGY CENTER	FL	0.0536408	0.634258	7.90598	2.29485	0.0364148	15.6649	27.932	1145.73	79.6362	167.261	-393.526	25.2672	57.2919	75.6227	35.0854	46.1597	194.5	226.902	44.4033	1.65332	2.50771	0.933726	3.10818e+09	14.2859	0.224327	0.256549	45.7521	1.70354	2.59702	0.0966981	3.82437	0.142397	1.66954e+09
2704	-99	28.56	10632.2	2594	26.4107	27.7312	1.01943	2000	0	7.87	30.7	33.9883	Electricity Generation	2.2797e+11	W A PARISH	TX	0.0556796	13.6732	7.87772	2.29584	0.0153119	15.6658	27.9109	1366.6	97.9639	243.812	-316.946	101.819	72.522	92.4729	40.4852	53.5519	271.052	303.454	236.002	2.21969	23.3197	2.1933	1.16586e+10	20.2427	0.326271	0.373135	241.076	2.26741	24.9731	0.234882	124.211	1.16826	6.26189e+09
2503	-81.5	26.94	1930.44	2670	29.9245	31.4207	0.211682	1310	0	7.8	32.2	34.4008	Stationary Combustion	3.13979e+10	POLK	FL	0.0575243	0.628351	7.89374	2.2968	0.04491	15.6668	27.9404	1221.77	85.6291	176.535	-384.282	34.5417	62.5259	81.5174	36.9043	48.753	203.775	236.177	33.074	1.71329	1.99969	1.03587	2.42087e+09	13.662	0.255828	0.292574	34.1207	1.76751	2.07299	0.107384	3.02003	0.156442	1.30035e+09
1693	-99.3	29.06	5919.07	2346	25.5186	26.7945	0.54798	400	0	7.2	24	26.629	Electricity Generation	1.22042e+11	W A PARISH	TX	0.0496602	39.1895	7.90075	2.30052	0.0282161	15.6705	27.9238	1184.6	83.0614	173.586	-387.161	31.592	59.9687	78.5164	36.0777	47.4228	200.825	233.227	126.381	2.13515	21.9587	3.70982	6.26689e+09	20.1665	0.246658	0.282087	129.113	2.1813	24.2071	0.408967	177.104	2.99209	3.36608e+09
3124	-98.9	27.06	3194.51	2290.62	27.4975	28.8723	0.319705	2000	0	7.6	0	2.1641	Petroleum and Natural Gas Systems	7.42885e+10	MARKHAM GAS PROCESSING PLANT	TX	0.048316	5.46597	7.88337	2.30599	0.0437966	15.676	27.9393	1182.34	88.6323	180.99	-379.787	38.996	64.5019	92.9555	40.597	53.7671	208.229	240.631	76.8095	2.40442	4.98727	1.5612	3.65626e+09	21.0077	0.313952	0.359046	78.3979	2.45414	5.23593	0.163904	17.6777	0.553376	1.96385e+09
2745	-99.8	28.81	5918.94	6056	26.0258	27.3271	0.555237	260	0	0	0	55.0567	Electricity Generation	1.29814e+11	W A PARISH	TX	0.139709	9.53079	7.88341	2.31095	0.0384479	15.681	27.934	1182.6	82.8153	183.778	-376.97	41.7846	59.802	78.1162	35.8801	47.2475	211.018	243.419	134.696	2.27568	22.6827	3.83223	6.3499e+09	21.2124	0.245314	0.28055	137.394	2.32127	23.5781	0.398349	61.2356	1.03457	3.40893e+09
2746	-99.8	28.81	5428.38	6056	26.0258	27.3271	0.509219	260	0	0	0	59.5976	Electricity Generation	1.19055e+11	W A PARISH	TX	0.139709	9.53079	7.92622	2.31142	0.0403151	15.6814	27.9359	1182.79	82.825	200.47	-360.279	58.4761	59.8105	78.2701	35.8809	47.315	227.709	260.111	123.532	2.27568	20.8028	3.83222	5.82361e+09	21.2123	0.245366	0.280609	126.007	2.32127	21.6239	0.398349	56.1604	1.03457	3.1264e+09
844	-96.5	30.69	8854	2078	24.3392	25.5562	0.780128	40	0	0	0	6.76796	Stationary Combustion	1.59663e+11	Permian Basin	TX	0.0431553	1.80502	7.91692	2.31712	0.0397656	15.6871	27.9353	1142.22	79.7213	167.118	-393.605	25.1242	57.0638	75.4208	35.0447	46.0596	194.357	226.759	165.897	1.8737	8.18768	0.924745	8.92183e+09	18.5945	0.227767	0.260483	169.798	1.91776	8.49461	0.095941	18.5207	0.209179	4.79233e+09
1764	-99.4	28.94	4589.56	3496.14	25.9637	27.2619	0.431615	138	5.2	6.9	24.5	26.0435	Electricity Generation	9.76678e+10	W A PARISH	TX	0.0775761	39.1895	7.92614	2.3264	0.0581718	15.6964	27.9537	1157.78	80.8271	169.356	-391.394	27.3627	58.1181	76.4706	35.338	46.5254	196.596	228.998	101.024	2.20117	20.1894	4.39898	4.9361e+09	20.4664	0.234679	0.268387	103.173	2.24798	22.0181	0.479742	142.429	3.10332	2.65089e+09
2786	-99.8	29.06	6243.44	4233.23	25.3754	26.6441	0.572747	216	6.7	5.6	26.7	51.3602	Electricity Generation	1.37935e+11	W A PARISH	TX	0.0954666	9.53079	7.93376	2.36263	0.0896329	15.7326	27.9852	1174.41	82.1852	173.684	-387.062	31.6905	59.2405	77.5581	35.7486	47.0021	200.923	233.325	142.321	2.27954	17.5733	2.81468	6.55014e+09	21.728	0.24272	0.277583	145.172	2.32519	18.3812	0.294408	57.2355	0.91673	3.51727e+09
2724	-99.3	28.69	6409.57	3020.82	26.3065	27.6219	0.611404	1285	0	8.08	32	27.5231	Electricity Generation	1.38042e+11	W A PARISH	TX	0.0660393	39.1895	7.9359	2.3685	0.0945136	15.7385	27.9901	1288.59	91.5723	169.766	-390.988	27.7726	67.1448	86.4313	38.6067	50.8989	197.006	229.407	142.829	2.22837	26.93	4.20154	6.99224e+09	20.4268	0.292149	0.334112	145.872	2.27585	29.4865	0.460039	200.065	3.12135	3.75535e+09
2001	-82.3	27.69	1670.94	6148.28	28.9685	30.4169	0.176417	779	0	0	25.5	12.3269	Cement Production	2.64259e+10	ALAMO SAN ANTONIO CEMENT PLANT	TX	0.141949	0.526669	7.90697	2.369	0.12256	15.739	28.0181	1092.45	78.1441	165.592	-395.211	23.5987	56.0312	78.8386	34.4098	47.5744	192.832	225.234	27.777	1.66235	4.01075	2.40029	2.01757e+09	13.7675	0.23461	0.268308	28.6482	1.7145	4.14354	0.247976	4.80485	0.287554	1.08334e+09
1954	-81.6	27.69	1940.36	6280	28.7218	30.1578	0.203197	240	0	0	0	14.4397	Stationary Combustion	3.05755e+10	BAYTOWN ENERGY CENTER	TX	0.145146	0.850795	7.92305	2.3771	0.126395	15.7471	28.0219	1149.19	79.7996	183.664	-377.143	41.67	57.5373	75.6911	35.104	46.1932	210.903	243.305	32.1281	1.65578	4.78951	2.46836	2.32383e+09	13.8255	0.224403	0.256635	33.1311	1.70747	4.95205	0.255213	6.1825	0.318626	1.24777e+09
2774	-99.3	28.94	4126.36	4088.56	25.9115	27.2071	0.386872	118	3.8	6.7	26.2	18.9808	Electricity Generation	8.57148e+10	W A PARISH	TX	0.0919554	39.1895	7.98772	2.39149	0.125339	15.7615	28.0209	1155.71	80.6671	168.342	-392.407	26.3485	57.9822	70.7684	35.323	44.0218	195.581	227.983	88.7005	2.14961	19.2284	4.65988	4.42441e+09	20.048	0.233422	0.26695	90.6257	2.19626	20.8942	0.50636	128.815	3.12177	2.37593e+09
1785	-81.3	28.06	1919.92	2080	28.5815	30.0106	0.200719	240	0	0	0	19.3171	Electricity Generation	3.0381e+10	COTTONWOOD ENERGY PROJECT	TX	0.0432039	0.605994	7.93472	2.39755	0.147183	15.7675	28.0427	1142.78	79.342	232.717	-328.08	90.7237	57.09	75.4789	35.0037	46.0984	259.957	292.359	31.982	1.6658	1.47057	0.765954	2.29549e+09	13.9325	0.222511	0.254472	32.9772	1.71763	1.52555	0.0794587	2.39163	0.124569	1.23307e+09
1974	-98.4	28.69	3597.66	3845	26.384	27.7032	0.344002	200	0	8.4	0	8.1778	Electricity Generation	7.27721e+10	BAYSIDE POWER STATION	FL	0.0860437	11.0304	7.98191	2.39984	0.136076	15.7698	28.0316	1160.92	81.0629	181.865	-378.893	39.8715	58.3526	76.679	35.4024	46.6182	209.105	241.506	75.4411	2.09695	9.26222	2.57452	3.93413e+09	19.1761	0.234948	0.268695	77.1516	2.1445	9.78216	0.271904	36.7932	1.0227	2.11274e+09
3076	-97.9	26.69	2566.48	2249.29	28.4191	29.84	0.265846	1015	0	7.82	29.2	36.1115	Electricity Generation	5.2434e+10	J T DEELY	TX	0.0473128	4.75327	8.00295	2.40415	0.146256	15.7742	28.0418	1233.67	86.8444	188.421	-372.367	46.4272	63.3453	82.1801	37.1522	49.0386	215.66	248.062	54.5403	2.1251	3.50325	1.365	3.04031e+09	17.9391	0.26513	0.303212	55.8595	2.1765	3.69002	0.143777	12.6871	0.494338	1.63307e+09
1699	-80.9	28.06	1396.02	6217.17	31.4278	32.9992	0.159539	240	0	0	0	16.0221	Electricity Generation	2.54797e+10	COTTONWOOD ENERGY PROJECT	TX	0.143621	0.605994	7.90577	2.43659	0.193423	15.8066	28.089	1129.44	78.198	164.608	-396.197	22.6146	56.1724	73.7776	34.48	45.3529	191.848	224.249	26.6958	1.91228	3.90466	2.79699	1.82455e+09	14.6315	0.215946	0.246963	27.4834	1.9687	4.02727	0.288482	4.71537	0.337772	9.79664e+08
2896	-99.1	27.44	5025.33	6086.28	27.2734	28.6371	0.494836	1171	1	8.7	28.9	28.9582	Stationary Combustion	1.23626e+11	J K SPRUCE	TX	0.140444	10.3795	7.98059	2.43735	0.166726	15.8074	28.0623	1306.99	92.9724	166.517	-394.253	24.5238	68.4131	88.3784	38.9445	51.7566	193.757	226.159	127.739	2.54189	21.6909	4.3163	5.65912e+09	22.5722	0.300455	0.343612	130.86	2.604	22.6322	0.450361	59.1801	1.17763	3.03795e+09
1670	-99.1	29.19	4948.37	2478	25.2547	26.5174	0.453319	300	0	0	0	26.48	Electricity Generation	1.00275e+11	W A PARISH	TX	0.0528641	4.10697	8.01266	2.48028	0.211163	15.8503	28.1067	1173.6	82.1601	171.866	-388.88	29.8722	59.2099	77.7523	35.1821	47.0873	199.105	231.507	103.859	2.09885	6.84999	1.38429	5.18433e+09	20.0332	0.241756	0.276481	106.119	2.14451	7.15259	0.144544	20.4077	0.412412	2.78457e+09
1224	-97.8	29.81	3037.86	2060	24.7828	26.0219	0.273049	18	0	0	0	9.58188	Stationary Combustion	5.78623e+10	LAGRANGE PLANT	TX	0.0427184	0.981956	8.01955	2.48312	0.224567	15.8531	28.1201	949.759	69.6413	145.565	-415.173	3.57113	48.4431	64.9083	31.6095	41.4473	172.804	205.206	60.0386	1.97634	2.76056	0.908717	3.12269e+09	19.2266	0.211382	0.241744	61.4015	2.02121	2.84517	0.0936568	4.75421	0.156499	1.67734e+09
775	-96.6	30.94	7824.79	2787	24.0669	25.2702	0.680688	50	0	6.7	0	14.0532	Electricity Generation	1.38749e+11	Odessa-Ector Generating Station	TX	0.0603641	2.16812	8.00385	2.50347	0.227936	15.8735	28.1235	1145.31	79.9876	167.62	-393.098	25.6263	57.2695	75.6876	35.128	46.1758	194.859	227.261	144.142	1.84212	9.77875	1.24972	7.7846e+09	18.5163	0.229046	0.261945	147.546	1.88562	10.1294	0.129452	20.6364	0.263731	4.18113e+09
1797	-98.6	28.94	7652.23	2342	25.9129	27.2086	0.719856	1900	0	7.2	0	23.5303	Electricity Generation	1.51568e+11	BAYSIDE POWER STATION	FL	0.0495631	11.0304	8.00539	2.51836	0.242058	15.8884	28.1376	1339.53	95.7569	149.922	-410.83	7.92844	70.6639	90.3668	39.8363	52.6262	177.161	209.563	157.276	2.05529	13.5936	1.77643	8.23254e+09	19.1041	0.313745	0.35881	160.862	2.10216	14.5526	0.190175	71.0862	0.92896	4.42192e+09
1450	-81	28.31	1728.36	8220	30.9225	32.4686	0.193705	1357	0	7.9	22.3	17.5384	Stationary Combustion	3.174e+10	WILLOW GLEN	LA	0.192233	0.605994	8.04348	2.51877	0.26947	15.8888	28.165	1255.19	88.4579	184.361	-376.438	42.3678	64.8493	83.578	37.6347	49.6543	211.601	244.003	33.1792	1.91969	6.46386	3.73987	2.21528e+09	14.9774	0.270756	0.309647	34.1343	1.97495	6.65896	0.385276	7.49422	0.433602	1.18918e+09
2871	-99.1	27.56	4342.15	9447.96	27.3222	28.6884	0.42558	344	1	8.2	32	28.8677	Stationary Combustion	1.06683e+11	J K SPRUCE	TX	0.222038	10.3795	8.01253	2.52138	0.253429	15.8914	28.149	1225.03	86.1168	174.368	-386.401	32.3749	62.7567	80.7853	36.7493	48.4231	201.608	234.01	111.248	2.56205	27.9271	6.43163	4.86708e+09	22.8573	0.263278	0.301095	113.623	2.61674	28.8852	0.665227	60.3029	1.38878	2.61152e+09
2927	-81.1	26.31	1335.04	2641.94	30.5598	32.0877	0.149757	2000	0	0	0	53.7944	Stationary Combustion	1.98564e+10	POLK	FL	0.0568432	0.722936	8.01933	2.54055	0.299527	15.9106	28.1951	1121.74	77.4209	208.431	-352.398	66.4372	55.603	73.6342	31.2673	45.2941	235.67	268.072	21.0442	1.5763	1.27528	0.955239	1.71267e+09	12.2874	0.210995	0.241301	21.7839	1.6317	1.32798	0.0994715	2.09884	0.157212	9.19962e+08
1529	-99.1	29.31	4930.8	2829	24.9401	26.1871	0.445748	125	0	7.4	0	29.8731	Electricity Generation	9.87608e+10	W A PARISH	TX	0.0613835	4.10697	8.04174	2.54823	0.279423	15.9182	28.175	1155.48	80.6771	169.033	-391.711	27.039	57.9553	76.3698	35.2727	46.4799	196.272	228.674	102.268	2.07406	7.61444	1.54426	5.09773e+09	20.0614	0.233816	0.2674	104.49	2.11913	7.93085	0.160843	20.964	0.425164	2.73794e+09
2891	-99.4	27.44	2593.06	4708.54	27.6468	29.0291	0.259413	246	1.3	8.5	27.8	16.3163	Stationary Combustion	6.26893e+10	J K SPRUCE	TX	0.107004	10.3795	8.08183	2.55918	0.301895	15.9292	28.1974	1175.02	82.1672	169.633	-391.135	27.6389	59.3179	77.2863	35.7992	46.8865	196.872	229.274	64.6549	2.49338	8.88462	3.4263	2.96675e+09	21.7932	0.242422	0.277243	65.9423	2.54303	9.28652	0.358129	28.4506	1.09718	1.59297e+09
1603	-99.5	29.19	9572.42	2030	25.0717	26.3253	0.870969	1400	0	6.8	33	43.3881	Electricity Generation	2.08898e+11	W A PARISH	TX	0.0419903	4.52504	8.05134	2.56906	0.290332	15.9391	28.1859	1312.04	93.559	193.548	-367.198	51.5545	68.7468	87.197	38.813	51.2335	220.787	253.189	215.81	2.2545	11.94	1.24734	9.96071e+09	21.6661	0.30393	0.347585	220.154	2.29987	12.5102	0.130691	40.5711	0.423833	5.35025e+09
2793	-99.3	29.06	3789.26	2346	25.5186	26.7945	0.350805	118	3.8	6.7	26.2	23.1186	Electricity Generation	7.81286e+10	W A PARISH	TX	0.0496602	39.1895	8.08482	2.57113	0.306958	15.9411	28.2025	1152.66	80.4383	198.626	-362.121	56.6325	57.7676	76.2728	35.5419	46.4379	225.866	258.267	80.9065	2.13515	14.0575	3.70982	4.01193e+09	20.1665	0.232636	0.266051	82.6553	2.1813	15.4968	0.408967	113.378	2.99209	2.15489e+09
1961	-98.5	28.69	3858.14	2374	26.377	27.6959	0.369654	956	0	8.3	29.6	10.8249	Electricity Generation	7.76067e+10	BAYSIDE POWER STATION	FL	0.0503398	11.0304	8.06702	2.57229	0.307041	15.9423	28.2026	1237.6	87.3677	155.999	-404.759	14.0051	63.6423	82.8659	37.4869	49.3344	183.238	215.64	80.5349	2.0874	7.03174	1.82257	4.2275e+09	19.0502	0.268822	0.307435	82.3753	2.1351	7.52555	0.195056	36.556	0.947504	2.2707e+09
2753	-99.4	28.81	7696.43	2275	25.9278	27.2242	0.724387	2000	0	7.8	0	28.6292	Electricity Generation	1.64436e+11	W A PARISH	TX	0.0479369	39.1895	8.05997	2.60638	0.329995	15.9764	28.2255	1369.26	98.2314	203.057	-357.695	61.0631	72.7105	92.9189	40.5743	53.7466	230.296	262.698	170.171	2.21104	28.8887	3.75351	8.28436e+09	20.5412	0.328015	0.37513	173.78	2.25793	31.8546	0.413888	233.973	3.04003	4.44973e+09
2722	-99.5	28.69	7290.45	2010	26.1255	27.4317	0.691545	2000	0	6.5	0	41.5936	Electricity Generation	1.58708e+11	W A PARISH	TX	0.0415049	9.53079	8.06417	2.61111	0.335358	15.9811	28.2309	1371.09	98.3753	170.926	-389.825	28.9325	72.8243	92.9225	40.6152	53.7481	198.166	230.567	164.202	2.2523	11.6284	1.59502	7.90876e+09	20.7621	0.328957	0.376207	167.649	2.29957	12.4201	0.170361	59.3477	0.814048	4.24811e+09
1530	-99	29.31	4638.99	3334	24.8901	26.1346	0.41818	142	0	8	0	34.1015	Electricity Generation	9.16472e+10	W A PARISH	TX	0.0736408	4.10697	8.09342	2.64143	0.373788	16.0114	28.2693	1158.32	80.906	169.477	-391.265	27.4833	58.1476	76.5158	35.3377	46.5438	196.716	229.118	94.9152	2.04603	8.24383	1.77707	4.78246e+09	19.8465	0.234805	0.268532	96.9992	2.09095	8.56609	0.184654	20.7924	0.44821	2.56845e+09
2778	-100.3	29.06	4361.82	2111.51	25.1086	26.364	0.397371	105	0	7.4	0	96.5061	Electricity Generation	9.85706e+10	W A PARISH	TX	0.0439687	20.4535	8.11694	2.64713	0.380454	16.0171	28.276	1158.64	80.8591	169.004	-391.741	27.0099	58.1063	76.4237	35.3364	46.5038	196.243	228.645	101.717	2.33199	10.4077	2.3861	4.54448e+09	22.3826	0.236577	0.270558	103.699	2.37742	11.2945	0.25894	69.1615	1.58561	2.44095e+09
2928	-97.4	27.31	1841.37	2360	30.3978	31.9177	0.203809	1475	0	8.1	26	21.623	Electricity Generation	3.2283e+10	O W SOMMERS	TX	0.05	5.00596	8.11254	2.6792	0.428392	16.0492	28.3239	1242.72	87.5231	181.61	-379.178	39.6162	63.9845	82.9075	37.4223	49.358	208.849	241.251	33.906	1.84135	2.44037	1.3253	2.33084e+09	14.5467	0.266017	0.304226	34.9174	1.89627	2.59136	0.14073	9.85577	0.53524	1.25201e+09
1931	-98.9	28.69	3024.54	2538	26.2709	27.5844	0.288495	240	0	0	0	18.5098	Electricity Generation	6.2134e+10	W A PARISH	TX	0.0543204	39.1895	8.12041	2.69884	0.43898	16.0688	28.3345	1163.73	81.2978	198.972	-361.785	56.978	58.5363	77.0788	35.5824	46.7935	226.211	258.613	64.4124	2.12966	11.7553	3.88664	3.29933e+09	19.5229	0.236687	0.270684	65.8487	2.17715	12.9455	0.428014	93.4396	3.08938	1.77211e+09
1656	-98.8	29.06	3327.14	2660	25.4785	26.7525	0.30753	70	0	6.63	24	22.887	Electricity Generation	6.49467e+10	W A PARISH	TX	0.0572816	11.0304	8.15537	2.70911	0.44779	16.0791	28.3433	1146.08	79.8848	167.541	-393.207	25.5476	57.314	75.5918	33.3515	46.1392	194.781	227.182	67.3754	2.02502	6.33657	1.90451	3.51702e+09	19.1569	0.228925	0.261806	68.9078	2.07108	6.758	0.203117	30.9088	0.928988	1.88902e+09
2186	-98.3	28.31	1807.99	3048.37	26.5254	27.8517	0.17411	130	0	7.1	0	5.6352	Petroleum and Natural Gas Systems	3.93913e+10	TARGA MIDSTREAM SERVICES LLC - VENICE GAS PROCESSING PLANT	LA	0.0667081	12.3906	8.13898	2.72372	0.477689	16.0937	28.3732	963.406	70.6427	147.478	-413.288	5.48448	49.3889	65.8259	31.9078	41.855	174.717	207.119	40.7521	2.254	4.29393	2.37497	1.99119e+09	20.4662	0.217363	0.248584	41.6176	2.30187	4.56374	0.25242	19.922	1.10188	1.06941e+09
316	-114.6	32.56	4000.34	8830	27.6713	29.0549	0.395547	168	0	7.6	0	17.1902	Electricity Generation	1.08835e+11	EDWARD L ADDISON GENERATING PLANT	GA	0.207039	100	8.17969	2.73626	0.4697	16.1063	28.3652	1202.26	84.4326	176.421	-384.318	34.4271	61.1966	79.1079	36.4906	47.6811	203.66	236.062	112.81	2.82	52.2416	13.0593	4.52362e+09	24.9379	0.255712	0.292441	115.002	2.87479	56.5551	1.41376	337.902	8.44684	2.42739e+09
862	-95.8	30.69	4449.84	5639	24.4748	25.6986	0.392855	52	4.6	6.8	21.7	8.77925	Electricity Generation	7.16043e+10	S O PURDOM	FL	0.129587	0.792624	8.19908	2.74019	0.473746	16.1102	28.3693	1146.35	80.004	167.735	-392.992	25.7413	57.3466	70.2225	35.1356	43.7783	194.974	227.376	74.6185	1.67688	9.89702	2.22413	4.49283e+09	16.6084	0.22739	0.260051	76.576	1.72087	10.1812	0.2288	12.3975	0.278605	2.41239e+09
1948	-98.5	28.69	2908.44	2374	26.377	27.6959	0.278662	240	0	0	0	27.9825	Electricity Generation	5.85035e+10	BAYSIDE POWER STATION	FL	0.0503398	11.0304	8.13029	2.75147	0.492431	16.1215	28.388	1162.22	81.1551	172.785	-387.973	30.7916	58.4225	76.5558	35.4641	46.5642	200.025	232.426	60.7109	2.0874	5.30085	1.82257	3.18688e+09	19.0502	0.235611	0.269454	62.0983	2.1351	5.6731	0.195056	27.5576	0.947505	1.71176e+09
2467	-81.8	26.94	1335.2	2490.39	29.654	31.1367	0.145127	240	0	0	0	28.1641	Stationary Combustion	2.0855e+10	POLK	FL	0.0531648	0.61676	8.13271	2.75384	0.513914	16.1238	28.4095	1140.35	79.0292	207.258	-353.558	65.2642	56.9131	75.3723	34.8833	46.055	234.497	266.899	22.007	1.64822	1.23536	0.925229	1.65972e+09	13.2594	0.220323	0.251969	22.7248	1.70199	1.28234	0.0960411	1.91965	0.143773	8.91524e+08
1566	-98.8	29.31	3947.09	3709.69	24.9925	26.2421	0.357228	30	3.2	6.9	26.2	19.6944	Stationary Combustion	7.57513e+10	CHANNEL ENERGY CENTER	TX	0.0827594	3.05015	8.15948	2.7552	0.490649	16.1252	28.3862	1144.69	79.7874	167.352	-393.392	25.3585	57.2215	75.5132	35.0123	46.1041	194.592	226.993	78.5319	1.98962	7.29495	1.84818	4.08539e+09	19.2226	0.228324	0.26112	80.3111	2.03469	7.54925	0.191261	15.3057	0.387771	2.194e+09
3248	-97.5	26.19	1390.04	3000.15	30.4907	32.0152	0.15451	23	3.1	7.5	23.3	26.517	Stationary Combustion	2.39148e+10	VANDOLAH POWER PROJECT	FL	0.0655377	42.8054	8.1773	2.76287	0.520769	16.1329	28.4163	1127.54	78.0785	205.508	-355.292	63.514	56.0304	72.348	34.4847	44.7243	232.747	265.149	25.1365	1.80832	6.47731	4.65979	1.76704e+09	14.2252	0.215319	0.246247	25.9019	1.86339	7.17813	0.516397	54.2672	3.90399	9.49111e+08
2729	-98.9	28.69	4817.4	2538	26.2709	27.5844	0.459506	2000	0	8.61	27.1	24.6097	Electricity Generation	9.89652e+10	W A PARISH	TX	0.0543204	39.1895	8.17945	2.77173	0.50237	16.1417	28.3979	1356.41	97.1258	170.173	-390.584	28.1795	71.8283	90.8309	40.2793	52.8308	197.413	229.814	102.594	2.12966	18.7235	3.88664	5.25508e+09	19.5229	0.321298	0.367449	104.882	2.17715	20.6191	0.428014	148.828	3.08938	2.82257e+09
1676	-80.9	28.06	1019.48	6217.17	31.4278	32.9992	0.116507	240	0	0	0	15.6698	Electricity Generation	1.86072e+10	COTTONWOOD ENERGY PROJECT	TX	0.143621	0.605994	8.27118	2.77957	0.547999	16.1496	28.4435	1129.44	78.1983	164.609	-396.196	22.6149	56.1726	73.803	34.4804	45.364	191.848	224.25	19.4953	1.91228	2.85148	2.79699	1.33242e+09	14.6315	0.215947	0.246965	20.0705	1.9687	2.94102	0.288482	3.44352	0.337772	7.15426e+08
1790	-99.5	28.94	3159.42	3496.14	25.8608	27.1538	0.295857	72	0	7.3	23	31.8003	Electricity Generation	6.82172e+10	W A PARISH	TX	0.0775761	9.53079	8.1729	2.78197	0.521535	16.152	28.4171	1151.29	80.2925	167.865	-392.885	25.8713	57.6642	75.8562	35.2034	46.2555	195.104	227.506	70.5159	2.23193	7.52953	2.3832	3.38352e+09	20.841	0.232071	0.265404	71.9888	2.27855	7.92083	0.250705	27.9936	0.886036	1.81708e+09
2777	-100.3	29.06	4017.71	2111.51	25.1086	26.364	0.366021	207	0	0	0	91.1716	Electricity Generation	9.07942e+10	W A PARISH	TX	0.0439687	20.4535	8.19215	2.79029	0.525243	16.1603	28.4208	1171.23	81.9049	168.15	-392.594	26.1564	58.9812	67.1632	35.6692	42.4383	195.389	227.791	93.6923	2.33199	9.58664	2.3861	4.18595e+09	22.3826	0.242168	0.276952	95.5178	2.37742	10.4035	0.25894	63.7052	1.58561	2.24838e+09
1959	-82.3	27.69	1202.28	6148.28	28.9685	30.4169	0.126936	135	0	7.2	24	9.89031	Cement Production	1.90141e+10	ALAMO SAN ANTONIO CEMENT PLANT	TX	0.141949	0.526669	8.16876	2.79416	0.559199	16.1642	28.4547	1041.53	74.0111	170.05	-390.753	28.0565	52.5194	69.68	33.1002	43.5537	197.289	229.691	19.9862	1.66235	2.88583	2.40029	1.45169e+09	13.7675	0.212516	0.243041	20.613	1.7145	2.98137	0.247976	3.4572	0.287554	7.79488e+08
2588	-99.3	27.69	2432.52	2683.27	27.6518	29.0344	0.244336	748	3.7	8.8	23.4	15.3289	Stationary Combustion	5.66902e+10	J K SPRUCE	TX	0.0578464	10.3795	8.19351	2.79733	0.541565	16.1673	28.4371	1226.4	86.4079	185.174	-375.595	43.18	62.8651	81.5749	37.0297	48.7694	212.413	244.815	58.6078	2.40934	5.24228	2.15508	2.79431e+09	20.974	0.264917	0.302968	59.8225	2.45928	5.56194	0.228649	23.6173	0.970898	1.50081e+09
3019	-98.9	26.44	1718.6	2152.84	28.7639	30.2021	0.180075	206	0	8.3	0	35.4811	Electricity Generation	4.09554e+10	MANATEE	FL	0.0449719	100	8.18955	2.81762	0.570526	16.1876	28.4661	1159.13	80.7607	169.166	-391.619	27.1725	58.2022	76.7789	35.4484	46.6669	196.405	228.807	42.3781	2.46585	15.0561	8.76071	2.0594e+09	20.5779	0.234512	0.268197	43.272	2.51787	16.8682	0.98151	145.079	8.44172	1.10617e+09
370	-113.3	32.56	3295.31	2310	26.3299	27.6464	0.314173	240	0	0	0	66.091	Electricity Generation	8.87304e+10	Hugo	OK	0.0487864	100	8.22973	2.822	0.5602	16.192	28.4557	1181.54	82.8236	173.081	-387.657	31.0876	59.7177	78.309	35.9659	47.3303	200.321	232.723	91.1992	2.76754	27.3924	8.31253	3.59299e+09	25.3825	0.249065	0.28484	92.7667	2.81511	30.5584	0.927329	254.23	7.7149	1.92978e+09
3125	-98.9	27.06	1523.61	2290.62	27.4975	28.8723	0.152482	295	4.8	7.1	25.9	7.42914	Petroleum and Natural Gas Systems	3.54315e+10	MARKHAM GAS PROCESSING PLANT	TX	0.048316	5.46597	8.20132	2.83169	0.590048	16.2017	28.4856	981.072	72.0523	180.075	-380.702	38.0811	50.6063	67.2377	32.3874	42.4768	207.314	239.716	36.6339	2.40442	2.37866	1.5612	1.74384e+09	21.0077	0.22532	0.257685	37.3915	2.45414	2.49725	0.163904	8.43127	0.553376	9.3665e+08
2895	-97.4	27.56	1835.52	2535	29.6778	31.1617	0.198189	1185	0	8.07	31.3	13.6582	Electricity Generation	3.50905e+10	O W SOMMERS	TX	0.0542476	5.00596	8.18371	2.84251	0.59252	16.2125	28.4881	1234.43	86.9257	165.687	-395.096	23.693	63.4207	83.4189	37.3428	49.5814	192.926	225.328	36.662	1.99736	2.71335	1.47824	2.26657e+09	16.1751	0.264043	0.301969	37.6459	2.05097	2.86435	0.156051	9.9282	0.540893	1.21745e+09
1720	-99.1	29.06	3236.32	2561	25.5309	26.8074	0.299736	300	0	0	0	13.6033	Electricity Generation	6.53593e+10	W A PARISH	TX	0.0548786	39.1895	8.21644	2.84391	0.583165	16.2139	28.4787	1171.99	82.0302	171.625	-389.124	29.631	59.1116	77.8196	32.4241	47.1172	198.864	231.266	67.727	2.09272	12.2949	3.79904	3.42789e+09	19.7576	0.240824	0.275415	69.2207	2.13887	13.5323	0.418138	97.1625	3.00225	1.84115e+09
2024	-81.6	27.69	1450.8	6280	28.7218	30.1578	0.15193	240	0	0	0	18.2712	Stationary Combustion	2.28612e+10	BAYTOWN ENERGY CENTER	TX	0.145146	0.850795	8.21152	2.84455	0.603038	16.2145	28.4986	1149.36	79.8085	163.368	-397.439	21.374	57.545	75.6988	35.104	46.1966	190.607	223.009	24.0221	1.65578	3.5811	2.46836	1.73752e+09	13.8255	0.22445	0.25669	24.772	1.70747	3.70263	0.255213	4.62263	0.318626	9.32953e+08
2978	-81.6	26.06	989.219	3640.8	30.877	32.4209	0.112141	23	0	0	0	54.151	Stationary Combustion	1.48101e+10	POLK	FL	0.0810873	0.607739	8.2901	2.85518	0.625157	16.2252	28.5207	1123.82	77.5525	172.917	-387.917	30.9234	55.7464	73.9123	33.9347	45.4172	200.156	232.558	15.6915	1.58625	1.32215	1.33656	1.28248e+09	12.2352	0.211637	0.242036	16.2445	1.64216	1.3737	0.138867	1.85891	0.187917	6.88826e+08
1657	-99	29.19	3618.26	3334	25.0524	26.305	0.328377	249	2.2	7.2	24.1	19.354	Electricity Generation	7.18901e+10	W A PARISH	TX	0.0736408	4.10697	8.22663	2.85799	0.595219	16.228	28.4908	1169.43	81.8234	171.23	-389.515	29.2366	58.9288	77.3539	33.2602	46.9122	198.47	230.871	74.4556	2.05777	6.46784	1.78755	3.75544e+09	19.8261	0.239678	0.274104	76.0916	2.10299	6.72086	0.185748	16.3216	0.45109	2.01689e+09
677	-96.8	31.06	4529.39	2078	23.9853	25.1846	0.392939	40	0	7.1	22	9.02795	Electricity Generation	7.93167e+10	Odessa-Ector Generating Station	TX	0.0431553	2.27079	8.27188	2.85924	0.592782	16.2292	28.4883	1142.57	79.7895	167.218	-393.496	25.2248	57.0856	75.512	35.0624	46.0982	194.458	226.86	82.461	1.82058	4.21024	0.929538	4.49379e+09	18.35	0.227986	0.260733	84.4277	1.864	4.38293	0.0967665	10.7361	0.237031	2.41383e+09
3029	-97.6	26.44	1763.99	5403	29.3855	30.8548	0.188294	1260	0	8.2	29.5	45.3086	Electricity Generation	3.29523e+10	J T DEELY	TX	0.123859	6.29155	8.22551	2.85928	0.610822	16.2293	28.5064	1250	88.0841	169.354	-391.438	27.3606	64.4636	83.2294	37.614	49.5001	196.594	228.996	34.3945	1.94981	5.12519	2.90546	2.1534e+09	15.9722	0.269837	0.308595	35.3259	2.00262	5.35683	0.303677	13.7889	0.781688	1.1563e+09
1622	-81	28.31	1173.71	8220	30.9225	32.4686	0.131543	240	0	0	0	11.1419	Electricity Generation	2.15543e+10	COTTONWOOD ENERGY PROJECT	TX	0.192233	0.605994	8.23658	2.86414	0.627835	16.2341	28.5234	1155.31	80.329	168.708	-392.091	26.7147	57.963	76.0599	35.1569	46.3538	195.948	228.35	22.5316	1.91969	4.38954	3.73987	1.50438e+09	14.9774	0.227302	0.25995	23.1803	1.97495	4.52203	0.385276	5.08924	0.433602	8.07562e+08
2721	-99.5	28.69	4964.05	2010	26.1255	27.4317	0.470871	2000	0	7.85	34.5	42.862	Electricity Generation	1.08064e+11	W A PARISH	TX	0.0415049	9.53079	8.24025	2.87233	0.602544	16.2423	28.4981	1371.15	98.3783	205.95	-354.802	63.9562	72.8268	93.146	40.6186	53.8462	233.189	265.591	111.805	2.2523	7.91774	1.59502	5.38505e+09	20.7621	0.328973	0.376225	114.152	2.29957	8.45679	0.170361	40.4097	0.814048	2.89253e+09
2037	-99.3	28.56	2384.62	2430	26.3974	27.7173	0.228529	125	0	6.73	25.8	35.8411	Electricity Generation	5.18779e+10	W A PARISH	TX	0.051699	13.6732	8.28271	2.8761	0.622101	16.2461	28.5176	1153.64	80.4531	167.668	-393.089	25.6741	57.8226	76.145	35.2089	46.3835	194.907	227.309	53.6821	2.25118	5.05721	2.12076	2.61354e+09	20.54	0.232904	0.266358	54.82	2.2989	5.42341	0.227433	27.6703	1.16036	1.40377e+09
2123	-82	27.56	1394.4	2460	28.8256	30.2669	0.147125	240	0	0	0	14.3867	Electricity Generation	2.19304e+10	OSPREY ENERGY CENTER	FL	0.0524272	0.769462	8.21395	2.88691	0.646508	16.2569	28.542	1142.16	79.258	152.761	-408.044	10.7675	57.0521	75.4138	34.9998	46.0711	180	212.402	23.0992	1.65657	1.2937	0.927781	1.68257e+09	13.7285	0.22191	0.253784	23.8279	1.70883	1.34304	0.096317	2.14909	0.154123	9.03797e+08
2867	-97.4	27.56	1699.79	2535	29.6778	31.1617	0.183534	1185	0	8.07	31.3	11.9481	Electricity Generation	3.24957e+10	O W SOMMERS	TX	0.0542476	5.00596	8.24084	2.89186	0.644178	16.2619	28.5397	1234.36	86.9223	176.991	-383.792	34.9971	63.4177	82.6414	34.5533	49.2401	204.23	236.632	33.951	1.99736	2.51271	1.47824	2.09897e+09	16.1751	0.264024	0.301948	34.8622	2.05097	2.65254	0.156051	9.19406	0.540893	1.12742e+09
1668	-99.1	29.06	3170.79	2561	25.5309	26.8074	0.293667	300	0	0	0	17.3554	Electricity Generation	6.4036e+10	W A PARISH	TX	0.0548786	39.1895	8.236	2.89506	0.634793	16.2651	28.5303	1172.15	82.0382	171.642	-389.106	29.6481	59.1185	77.6175	35.7208	47.0285	198.881	231.283	66.3557	2.09272	12.046	3.79904	3.35849e+09	19.7576	0.240866	0.275464	67.8192	2.13887	13.2583	0.418138	95.1952	3.00225	1.80387e+09
1926	-98.3	28.69	2887.35	7948	26.1964	27.5062	0.272241	240	0	7.45	26.5	12.2688	Electricity Generation	5.864e+10	BAYSIDE POWER STATION	FL	0.185631	11.0304	8.25702	2.90116	0.642702	16.2712	28.5382	1180.63	82.6127	172.771	-387.986	30.7776	59.7091	77.6257	35.8337	47.0337	200.011	232.412	61.1762	2.11876	13.5491	4.69258	3.11344e+09	19.649	0.2428	0.277675	62.4746	2.16373	14.0838	0.487776	35.4485	1.22772	1.67109e+09
2802	-99.8	29.19	4096.55	4406	24.9962	26.246	0.369977	328	3.5	7.5	28.5	63.1545	Electricity Generation	9.17727e+10	W A PARISH	TX	0.0996602	4.52504	8.26139	2.90521	0.639955	16.2752	28.5355	1192.35	83.6589	231.037	-329.707	89.0437	60.4664	78.8759	36.1884	47.5803	258.277	290.679	94.5921	2.30906	10.6497	2.59966	4.23119e+09	22.3559	0.251029	0.287086	96.4333	2.35401	10.9974	0.268456	22.9133	0.559332	2.27196e+09
2908	-81.6	26.44	1001.25	2960	30.4377	31.9596	0.111846	140	0	0	0	29.3105	Stationary Combustion	1.49203e+10	POLK	FL	0.0645631	0.604313	8.32047	2.91127	0.681358	16.2813	28.5769	1130.63	78.1743	170.204	-390.623	28.2109	56.2409	72.6885	34.678	44.8787	197.444	229.846	15.805	1.57853	1.06978	1.06844	1.27911e+09	12.3563	0.215098	0.245994	16.3574	1.63369	1.11209	0.11107	1.59333	0.159134	6.87054e+08
2866	-99.1	27.56	2805.66	9447.96	27.3222	28.6884	0.274986	213	1.2	7.7	30.9	25.3766	Stationary Combustion	6.89324e+10	J K SPRUCE	TX	0.222038	10.3795	8.26069	2.92265	0.663954	16.2926	28.5595	1207.03	84.638	177.729	-383.041	35.7357	61.5179	80.4399	36.3666	48.2714	204.969	237.371	71.8825	2.56205	18.045	6.43163	3.14484e+09	22.8573	0.255373	0.292054	73.4169	2.61674	18.664	0.665228	38.9645	1.38878	1.68742e+09
2107	-81.9	27.56	1532.53	2460	28.8348	30.2765	0.161773	240	0	0	0	2.44248	Stationary Combustion	2.39962e+10	WHEELABRATOR RIDGE ENERGY INC.	FL	0.0524272	0.769462	8.2146	2.93384	0.690193	16.3038	28.5857	1141.45	79.2106	149.825	-410.981	7.83107	57.0152	75.1374	35.0034	45.9499	177.064	209.466	25.2814	1.64965	1.41633	0.924179	1.8501e+09	13.6649	0.221617	0.25345	26.0825	1.70193	1.47059	0.0959582	2.35689	0.153791	9.93781e+08
1345	-98.1	29.56	5446.73	4040.34	24.9562	26.204	0.491846	1562	0	6.6	28.2	11.0353	Electricity Generation	1.01394e+11	CANE ISLAND	FL	0.090785	1.09669	8.27367	2.93786	0.667328	16.3079	28.5629	1307.18	93.146	192.874	-367.868	50.8801	68.444	78.4457	35.9847	47.3908	220.113	252.515	105.212	1.93165	9.94557	1.82597	5.62493e+09	18.7046	0.29931	0.342301	107.662	1.97663	10.221	0.187653	14.0606	0.258148	3.0207e+09
1669	-99	29.06	2758.96	2132	25.4272	26.6986	0.254648	125	0	7.4	0	18.0796	Electricity Generation	5.46319e+10	W A PARISH	TX	0.044466	39.1895	8.31151	2.95212	0.695301	16.3221	28.5908	1151.34	80.3353	168.384	-392.363	26.3905	57.6819	76.336	35.1808	46.4657	195.623	228.025	56.6568	2.05355	9.80706	3.55462	2.91225e+09	19.4546	0.231639	0.264911	57.9264	2.09957	10.8456	0.393103	81.8997	2.96849	1.56428e+09
1572	-99.3	29.31	3362.13	2829	24.8494	26.0919	0.302819	150	0	7.39	23.1	37.1859	Electricity Generation	6.82591e+10	W A PARISH	TX	0.0613835	4.10697	8.30463	2.98569	0.724711	16.3557	28.6203	1159.54	81.0046	169.658	-391.085	27.664	58.2287	76.7799	35.4017	46.6599	196.897	229.299	70.6398	2.10105	5.24433	1.55983	3.46315e+09	20.3975	0.235811	0.269682	72.1494	2.14594	5.45928	0.162376	14.3133	0.425722	1.86001e+09
2294	-80.1	26.94	1048.6	13243.6	32.5334	34.16	0.123243	155	0	0	0	24.7124	Stationary Combustion	1.97712e+10	GUADALUPE GENERATING STATION	TX	0.314166	0.719073	8.24999	3.00554	0.77176	16.3755	28.6673	1170.03	81.2005	164.082	-396.743	22.0884	58.9652	76.9532	35.3881	46.7505	191.321	223.723	21.015	2.0041	6.66691	6.35791	1.40945e+09	14.9101	0.231134	0.264333	21.7322	2.07249	6.90086	0.658102	7.5311	0.718204	7.56185e+08
288	-112.9	32.81	4693.99	2772.83	26.0675	27.3708	0.442578	1230	0	0	31.5	19.9214	Electricity Generation	1.27125e+11	Hugo	OK	0.06002	100	8.30361	3.01813	0.749447	16.3881	28.645	1328.56	95.042	196.233	-364.505	54.2393	69.911	89.508	39.5796	52.2466	223.472	255.874	130.57	2.78164	40.1569	8.55498	5.06148e+09	25.7967	0.314566	0.359749	132.777	2.82866	44.639	0.950982	359.704	7.66308	2.71829e+09
1865	-98.4	28.81	2857.43	3080	26.1758	27.4846	0.271297	956	0	8.3	29.6	9.32139	Electricity Generation	5.7554e+10	BAYSIDE POWER STATION	FL	0.0674757	11.0304	8.32718	3.0248	0.766414	16.3948	28.662	1241.58	87.7091	200.256	-360.499	58.2621	63.9188	82.8741	37.4759	49.3374	227.495	259.897	59.6822	2.08867	6.21244	2.17413	3.10265e+09	19.2359	0.270662	0.309538	61.0326	2.13592	6.59777	0.230898	27.902	0.97647	1.66637e+09
2481	-99.5	27.94	3519.02	4415.78	26.972	28.3207	0.343586	2000	3.3	8.5	31.2	26.6315	Stationary Combustion	7.99833e+10	J K SPRUCE	TX	0.0998975	10.3795	8.3481	3.0511	0.787365	16.4211	28.6829	1386.28	99.5716	166.174	-394.588	24.1808	73.8872	93.9007	40.9238	54.1794	193.414	225.816	82.6084	2.34748	10.8567	3.08515	3.92937e+09	21.0233	0.335032	0.383155	84.3151	2.39598	11.3772	0.323306	36.7609	1.04463	2.10996e+09
1600	-99	29.19	3087.88	3334	25.0524	26.305	0.280241	125	0	7.4	0	20.3811	Electricity Generation	6.13519e+10	W A PARISH	TX	0.0736408	4.10697	8.3153	3.05493	0.795764	16.4249	28.6913	1155.56	80.6819	169.053	-391.692	27.0591	57.9705	76.297	35.3309	46.4482	196.292	228.694	63.5415	2.05777	5.51974	1.78755	3.20494e+09	19.8261	0.233576	0.267125	64.9376	2.10299	5.73567	0.185748	13.9291	0.45109	1.72124e+09
2543	-81.8	26.81	1063.12	2683.27	29.7141	31.1998	0.115854	600	0	0	0	18.8289	Stationary Combustion	1.66091e+10	POLK	FL	0.0578464	0.61676	8.42584	3.0559	0.824536	16.4259	28.7201	1165.98	81.0936	178.69	-382.131	36.6962	58.6914	77.1561	35.4925	46.839	205.929	238.331	17.5266	1.6486	1.06603	1.00274	1.32494e+09	13.2282	0.231343	0.264572	18.0993	1.70247	1.10619	0.104051	1.61494	0.151906	7.11684e+08
1877	-98.3	28.94	2911.28	3080	25.9262	27.2226	0.273747	900	0	0	0	26.0584	Electricity Generation	5.75836e+10	BAYSIDE POWER STATION	FL	0.0674757	11.0304	8.3531	3.06351	0.804905	16.4335	28.7004	1235.47	87.1935	182.771	-377.982	40.7778	63.4798	82.5408	37.2434	49.1908	210.011	242.413	59.7323	2.05175	6.23556	2.14186	3.13067e+09	19.0797	0.267816	0.306284	61.0951	2.09856	6.62438	0.227542	28.1211	0.965934	1.68142e+09
2807	-81.5	26.69	1057.65	2077.07	29.895	31.3897	0.116032	820	0	6.9	28.9	20.4416	Stationary Combustion	1.65423e+10	POLK	FL	0.0431327	0.722936	8.43183	3.06756	0.836132	16.4376	28.7317	1179.99	82.227	174.821	-386.001	32.8273	59.6564	78.4761	35.9425	47.4185	202.06	234.462	17.4663	1.65143	0.814628	0.770224	1.32699e+09	13.1624	0.237417	0.271518	18.0401	1.70568	0.847636	0.0801433	1.44493	0.136616	7.12822e+08
2556	-81.5	26.81	1079.82	2070.18	29.9354	31.4322	0.118578	820	0	6.9	28.9	25.6615	Stationary Combustion	1.72951e+10	POLK	FL	0.0429655	0.628351	8.41452	3.07108	0.838774	16.4411	28.7343	1182.07	82.4019	172.968	-387.853	30.974	59.795	78.4404	35.9759	47.4026	200.207	232.609	18.2392	1.6891	0.83807	0.776119	1.3561e+09	13.4498	0.238517	0.272776	18.8257	1.74341	0.870603	0.0806247	1.40113	0.129756	7.28459e+08
691	-96.9	31.06	11425.4	5280	24.1183	25.3242	0.991911	2000	0	6.2	0	27.0783	Electricity Generation	2.02924e+11	Odessa-Ector Generating Station	TX	0.120874	2.27079	8.3177	3.07291	0.792683	16.4429	28.6882	1359.56	97.5459	201.222	-359.492	59.2282	72.0432	93.1983	40.3665	53.8625	228.461	260.863	210.52	1.84256	27.0912	2.37114	1.13439e+10	18.558	0.322509	0.368834	215.47	1.88589	27.9105	0.244286	43.9418	0.384598	6.09097e+09
931	-81.4	29.44	1381.26	4310	28.9795	30.4285	0.145755	180	0	7.5	0	23.0878	Electricity Generation	2.04863e+10	WASHINGTON COUNTY COGEN (OLIN)	AL	0.0973301	0.519657	8.32545	3.07312	0.833052	16.4431	28.7286	1139.29	79.1092	166.272	-394.51	24.2786	56.8453	69.7718	34.9098	43.5903	193.512	225.913	21.63	1.56596	2.16057	1.5642	1.66691e+09	12.9761	0.220207	0.251837	22.3527	1.61828	2.23835	0.162051	2.77756	0.201089	8.95235e+08
1962	-98.5	28.69	2429.21	2374	26.377	27.6959	0.232746	956	0	8.3	29.6	11.3895	Electricity Generation	4.88637e+10	BAYSIDE POWER STATION	FL	0.0503398	11.0304	8.41199	3.08437	0.829876	16.4544	28.7254	1237.63	87.3696	167.65	-393.108	25.6568	63.6439	82.621	37.3552	49.2268	194.89	227.292	50.7074	2.0874	4.42741	1.82257	2.66177e+09	19.0502	0.268832	0.307447	51.8662	2.1351	4.73833	0.195056	23.0169	0.947504	1.42971e+09
3255	-98.1	26.06	2455.41	7590	28.5787	30.0076	0.253597	2000	0	7.2	0	18.5273	Electricity Generation	5.57122e+10	J T DEELY	TX	0.176942	100	8.3568	3.08452	0.827814	16.4545	28.7234	1388.48	99.4803	164.315	-396.477	22.3213	74.0477	93.9521	41.7556	54.2073	191.554	223.956	58.0006	2.36215	28.7822	11.7219	2.90023e+09	19.9986	0.333156	0.381009	59.6437	2.42907	31.5535	1.28506	211.985	8.63339	1.55671e+09
2177	-98	28.31	2039.03	2236	26.2109	27.5215	0.194354	893	0	8.65	0	10.833	Stationary Combustion	4.09481e+10	OLD OCEAN GAS PLANT	TX	0.0469903	12.3906	8.39008	3.09543	0.846019	16.4654	28.7416	1040.8	76.9976	147.494	-413.271	5.49989	54.725	81.9174	35.4024	48.9192	174.733	207.135	42.489	2.08378	3.75518	1.84165	2.2227e+09	19.1159	0.250469	0.286446	43.456	2.13121	4.03758	0.198015	21.1835	1.0389	1.19389e+09
624	-96.9	31.31	6136.89	10151	23.8246	25.0158	0.521733	28	0	6.7	24	18.6751	Stationary Combustion	1.12991e+11	TENASKA GATEWAY GENERATING STATION	TX	0.239102	2.9517	8.3705	3.11828	0.846782	16.4883	28.7423	1176.65	82.4247	172.572	-388.138	30.5784	59.4281	77.5784	35.6285	47.0045	199.811	232.213	117.937	1.92177	29.3236	4.77825	5.96673e+09	19.7658	0.241603	0.276306	120.896	1.96999	30.1814	0.491802	41.1349	0.670289	3.20168e+09
1294	-81.9	28.81	1340.84	2510	27.5188	28.8947	0.134735	240	0.2	7.3	24.5	2.63223	Lime Manufacturing	2.03467e+10	CHEMICAL LIME LTD MARBLE FALLS PLANT	TX	0.0536408	0.821304	8.30913	3.1374	0.900177	16.5074	28.7957	1046.01	74.4949	156.2	-404.584	14.2068	52.8355	70.2554	33.3416	43.8029	183.44	215.842	21.4188	1.59741	1.22973	0.917131	1.54088e+09	13.9004	0.215617	0.246587	22.0876	1.64729	1.2765	0.0952011	2.0644	0.153962	8.27678e+08
1204	-103	29.69	4565.08	2249.29	24.5864	25.8158	0.406472	49	1.5	6.8	20.3	82.0606	Stationary Combustion	1.15409e+11	ONSHORE TREATING FACILITY	AL	0.0473128	100	8.40546	3.18635	0.919241	16.5563	28.8148	966.846	71.0006	148.144	-412.587	6.1507	49.5494	65.9556	31.9839	41.9057	175.384	207.786	118.608	2.59816	35.2951	7.73154	4.64856e+09	25.515	0.22327	0.25534	120.638	2.64262	39.3886	0.862823	328.774	7.20192	2.49673e+09
1947	-99	28.69	2577.72	2594	26.1848	27.4941	0.244993	1000	0	7.24	29	28.156	Electricity Generation	5.37096e+10	W A PARISH	TX	0.0556796	39.1895	8.42533	3.19191	0.936071	16.5619	28.8316	1250.05	88.3919	172.65	-388.105	30.6564	64.4838	83.8373	37.7278	49.7603	199.889	232.291	55.642	2.15857	10.1096	3.9219	2.80183e+09	19.8592	0.274843	0.314321	56.8619	2.2059	11.1218	0.431459	79.4777	3.08325	1.50488e+09
2305	-81.8	27.19	1050.59	2460	29.3695	30.8379	0.113019	240	0	0	0	2.25891	Electricity Generation	1.65087e+10	ORANGE COGENERATION FACILITY	FL	0.0524272	0.795302	8.49879	3.19368	0.963335	16.5637	28.8589	1140.27	79.0825	189.501	-371.31	47.5074	56.9336	75.0228	34.9363	45.9006	216.74	249.142	17.4063	1.65681	0.978204	0.931098	1.29253e+09	13.4669	0.22075	0.252457	17.9657	1.71005	1.01638	0.0967433	1.65637	0.157661	6.94285e+08
1673	-81.1	28.06	1097.32	2080	28.8014	30.2414	0.115574	240	0	0	0	20.0163	Electricity Generation	1.75538e+10	COTTONWOOD ENERGY PROJECT	TX	0.0432039	0.605994	8.53052	3.23249	1.00123	16.6025	28.8968	1142.79	79.3421	166.739	-394.059	24.7452	57.09	75.5138	34.9618	46.1138	193.978	226.38	18.4756	1.6837	0.849366	0.774036	1.32175e+09	13.9782	0.222496	0.254455	19.0487	1.73593	0.88102	0.0802882	1.37971	0.125735	7.10003e+08
2234	-97.1	28.31	1264.32	2320	27.092	28.4466	0.124559	2000	0	0	0	25.7568	Petroleum and Natural Gas Systems	2.2692e+10	COPANO PROCESSING HOUSTON CENTRAL GAS PLT	TX	0.0490291	1.44908	8.42957	3.23356	0.99932	16.6036	28.8949	941.831	68.8303	207.78	-352.988	65.7861	47.8797	64.2112	31.3861	41.1465	235.019	267.421	23.6827	1.87315	1.29295	1.02265	1.42451e+09	16.6252	0.204908	0.23434	24.3022	1.92216	1.34109	0.106072	2.62623	0.207719	7.65162e+08
2801	-99.9	29.19	4142.58	9799.28	25.0318	26.2834	0.371024	295	6.1	6.8	26.6	69.1909	Electricity Generation	9.12569e+10	W A PARISH	TX	0.230565	4.52504	8.43807	3.23382	0.968521	16.6038	28.8641	1223.46	86.0619	190.921	-369.823	48.9271	62.6079	80.6856	33.5411	48.3747	218.16	250.562	95.1393	2.29662	23.1618	5.59116	4.24316e+09	22.4218	0.262806	0.300555	97.2174	2.34678	23.8047	0.574633	35.7453	0.862875	2.27668e+09
2730	-98.8	28.69	3156.04	2538	26.2568	27.5696	0.300881	2000	0	8.61	27.1	28.9776	Electricity Generation	6.38598e+10	W A PARISH	TX	0.0543204	11.0304	8.44193	3.23726	0.976433	16.6073	28.872	1352.91	96.8276	170.202	-390.554	28.2085	71.582	91.3681	40.1593	53.0666	197.441	229.843	66.2374	2.09875	6.02168	1.90798	3.44098e+09	19.2496	0.319517	0.365412	67.7355	2.14621	6.42953	0.203721	30.0584	0.952408	1.8482e+09
1248	-97.8	29.81	2520.65	2060	24.7828	26.0219	0.226561	50	0	7.9	21	10.7288	Electricity Generation	4.8011e+10	SABINE	TX	0.0427184	0.981956	8.50544	3.2527	0.998931	16.6227	28.8945	1143.54	79.7496	167.227	-393.511	25.2335	57.151	75.4908	35.0565	46.0931	194.466	226.868	49.8167	1.97634	2.29056	0.908718	2.59104e+09	19.2266	0.228376	0.261179	50.9476	2.02121	2.36076	0.0936569	3.94478	0.156499	1.39176e+09
2728	-99	28.69	2362.11	2594	26.1848	27.4941	0.2245	1000	0	7.24	29	25.5347	Electricity Generation	4.9217e+10	W A PARISH	TX	0.0556796	39.1895	8.49731	3.2717	1.01819	16.6417	28.9137	1249.94	88.3865	189.851	-370.905	47.857	64.4791	83.7752	37.6337	49.7331	217.09	249.492	50.9878	2.15857	9.26394	3.9219	2.56747e+09	19.8592	0.274815	0.314288	52.1056	2.2059	10.1915	0.431459	72.8297	3.08325	1.379e+09
1975	-82.1	27.69	1100.2	6148.28	28.8205	30.2615	0.115583	240	0	0	0	14.9795	Stationary Combustion	1.74099e+10	CEDAR BAYOU	TX	0.141949	0.526669	8.56315	3.29944	1.06819	16.6694	28.9637	1148.97	79.7928	194.517	-366.288	52.5229	57.5215	70.3786	33.3833	43.8606	221.756	254.158	18.2945	1.66284	2.64134	2.40078	1.32185e+09	13.8401	0.224373	0.256601	18.8653	1.71471	2.72832	0.247984	3.16159	0.287365	7.0977e+08
3254	-97.8	26.06	1382.8	2047	28.8229	30.264	0.145427	159	0	0	0	25.4823	Stationary Combustion	2.83785e+10	VANDOLAH POWER PROJECT	FL	0.0424029	42.8054	8.4589	3.30293	1.06294	16.6729	28.9585	1146.4	79.671	164.203	-396.591	22.2096	57.3331	75.5617	35.0558	46.1341	191.443	223.844	29.5331	2.13574	5.79827	4.19314	1.66316e+09	17.7572	0.22669	0.259251	30.2544	2.18791	6.44158	0.465836	50.7651	3.67118	8.9337e+08
2803	-99.6	29.19	2581.58	4406	24.9008	26.1458	0.232272	59	6.5	7.2	24.7	49.9314	Electricity Generation	5.86096e+10	W A PARISH	TX	0.0996602	4.52504	8.54219	3.30827	1.05384	16.6783	28.9494	1157.87	80.8296	210.445	-350.301	68.4512	58.1002	76.2906	35.2604	46.4455	237.684	270.086	60.377	2.33876	6.78473	2.62813	2.65634e+09	22.7294	0.236172	0.270095	61.5328	2.38353	7.00304	0.271269	14.4838	0.561044	1.42633e+09
2012	-98.3	28.56	1758.99	8508	26.1962	27.5061	0.165694	380	0	7.9	26	15.057	Stationary Combustion	3.72012e+10	EQUISTAR CHEMICALS LAPORTE COMPLEX	TX	0.199223	12.3906	8.42724	3.31485	1.07044	16.6849	28.966	1044.51	76.2311	188.67	-372.09	46.6768	54.2246	74.1286	34.5906	45.4991	215.91	248.312	38.7266	2.20164	9.21452	5.23852	1.89494e+09	20.4369	0.240688	0.275259	39.6563	2.25449	9.60033	0.545786	24.2056	1.37611	1.01698e+09
2273	-98.3	28.31	1319.13	3048.37	26.5254	27.8517	0.127033	130	0	7.1	0	4.58986	Petroleum and Natural Gas Systems	2.87403e+10	TARGA MIDSTREAM SERVICES LLC - VENICE GAS PROCESSING PLANT	LA	0.0667081	12.3906	8.48403	3.32079	1.0858	16.6908	28.9813	963.374	70.6415	213.093	-347.672	71.0998	49.3878	65.8966	31.9753	41.8861	240.333	272.735	29.7331	2.254	3.13289	2.37497	1.45279e+09	20.4662	0.217356	0.248576	30.3646	2.30187	3.32975	0.25242	14.5353	1.10188	7.80253e+08
1761	-99.1	28.94	2163.46	4102	25.9017	27.1967	0.202839	255	0	6.47	25.5	11.3284	Electricity Generation	4.38939e+10	W A PARISH	TX	0.0922816	39.1895	8.48202	3.33051	1.07985	16.7005	28.9754	1169.74	81.8194	171.258	-389.493	29.2648	58.9586	77.551	35.6919	46.9998	198.498	230.9	45.461	2.10131	10.0003	4.62234	2.31975e+09	19.5974	0.239274	0.273642	46.4701	2.14795	10.874	0.502621	67.4581	3.11806	1.24572e+09
3078	-97.8	26.69	1387.51	2035.74	29.0149	30.4656	0.146832	1060	0	8.2	0	45.7143	Electricity Generation	2.69577e+10	J T DEELY	TX	0.0421295	4.75327	8.47174	3.33568	1.09535	16.7057	28.9909	1227.97	86.3306	181.869	-378.922	39.8752	62.9424	81.9085	37.0388	48.9199	209.108	241.51	28.1259	2.02707	1.69461	1.22133	1.67922e+09	16.7494	0.261527	0.299091	28.8545	2.07958	1.79401	0.129297	6.76343	0.48745	9.02007e+08
906	-81.4	29.44	1106.61	4310	28.9795	30.4285	0.116773	180	0	7.5	0	19.2313	Electricity Generation	1.64128e+10	WASHINGTON COUNTY COGEN (OLIN)	AL	0.0973301	0.519657	8.5862	3.33986	1.10818	16.7099	29.0037	1139.14	79.1018	166.256	-394.527	24.2625	56.8388	75.0199	34.8912	45.8943	193.496	225.897	17.3291	1.56596	1.73096	1.5642	1.33546e+09	12.9761	0.220167	0.251791	17.9081	1.61828	1.79328	0.162051	2.22527	0.201089	7.17227e+08
1678	-81.4	28.19	1346.87	2080	28.5429	29.9701	0.140565	1230	0.9	7.9	22.6	12.3177	Stationary Combustion	2.12859e+10	R S NELSON	LA	0.0432039	0.605994	8.45122	3.34676	1.10798	16.7168	29.0035	1217.47	85.434	178.48	-382.315	36.4867	62.2514	81.4107	36.805	48.7021	205.72	238.122	22.4074	1.66366	1.03029	0.764952	1.60755e+09	13.9389	0.255063	0.2917	23.1046	1.71542	1.0688	0.0793542	1.67532	0.124386	8.63526e+08
1522	-99.8	29.31	4342.45	9799.28	24.3845	25.6038	0.378822	230	3.5	7.8	28.3	72.8428	Electricity Generation	9.48599e+10	W A PARISH	TX	0.230565	4.52504	8.51666	3.34694	1.08122	16.7169	28.9768	1218.55	85.6646	178.847	-381.896	36.8537	62.2652	80.0702	36.6008	48.1043	206.087	238.489	98.8385	2.2761	24.0405	5.53617	4.33235e+09	22.8141	0.261008	0.298498	100.957	2.32489	24.6961	0.568715	36.8875	0.849465	2.32449e+09
2772	-99.5	28.94	2030.14	3496.14	25.8608	27.1538	0.190108	62	5.3	6.7	28.4	33.123	Electricity Generation	4.38341e+10	W A PARISH	TX	0.0775761	9.53079	8.53442	3.34977	1.10102	16.7198	28.9966	1150.16	80.1985	170.982	-389.768	28.9883	57.5854	75.5408	35.1265	46.1171	198.221	230.623	45.3112	2.23193	4.83823	2.3832	2.17414e+09	20.841	0.231568	0.264829	46.2576	2.27855	5.08967	0.250705	17.9878	0.886036	1.1676e+09
2584	-81.6	26.81	961.521	2683.27	29.8442	31.3364	0.105201	600	0	0	0	16.2132	Stationary Combustion	1.51468e+10	POLK	FL	0.0578464	0.61676	8.548	3.36274	1.13541	16.7327	29.031	1166.05	81.1134	193.127	-367.692	51.1331	58.6991	77.1515	35.494	46.8366	220.366	252.768	15.9801	1.66196	0.971772	1.01066	1.20311e+09	13.2823	0.231464	0.26471	16.5002	1.71605	1.00824	0.104859	1.47022	0.152905	6.46242e+08
2161	-98.4	28.31	1155.38	3300	26.7755	28.1143	0.112266	140	0	7.8	0	12.8848	Stationary Combustion	2.42392e+10	NORTH TERREBONNE GAS PLANT	LA	0.0728155	10.9862	8.60145	3.37683	1.14676	16.7468	29.0423	962.906	70.5944	166.48	-394.284	24.4864	49.3471	67.3728	31.9086	42.5338	193.719	226.121	25.1155	2.17378	2.7295	2.36242	1.28391e+09	19.5616	0.216439	0.247527	25.6736	2.22209	2.89137	0.250252	11.6718	1.01021	6.89541e+08
1141	-97	29.94	2433.45	2060	24.8387	26.0807	0.219235	200	0	7.4	0	18.6993	Stationary Combustion	4.38879e+10	MICHOUD	LA	0.0427184	2.20409	8.5571	3.37853	1.12566	16.7485	29.0212	1157.08	80.8529	169.343	-391.394	27.3493	58.0773	76.6581	35.4067	46.6053	196.582	228.984	45.6382	1.87545	2.30247	0.946174	2.50725e+09	18.2025	0.233566	0.267114	46.7327	1.92043	2.39678	0.0984932	5.83732	0.239878	1.34677e+09
381	-113.3	32.81	2893.85	3833.68	25.2433	26.5055	0.263805	542	0	7.7	26.5	42.5155	Electricity Generation	7.51295e+10	Hugo	OK	0.085769	100	8.58358	3.40214	1.14444	16.7721	29.04	1232.28	87.041	181.091	-379.646	39.0975	63.2433	81.8014	33.7683	48.8633	208.331	240.732	77.1415	2.6657	25.8812	8.94353	3.01697e+09	25.5692	0.271515	0.310515	78.456	2.71113	28.5831	0.987719	216.352	7.47628	1.62002e+09
2893	-97.4	27.44	1301.81	2687	30.1041	31.6093	0.142583	1251	0	7.9	0	18.4011	Electricity Generation	2.39068e+10	O W SOMMERS	TX	0.0579369	5.00596	8.48765	3.40257	1.16328	16.7726	29.0588	1233.26	86.7921	158.319	-402.466	16.3257	63.3351	82.1193	37.1414	49.0114	185.559	217.961	25.0371	1.92325	1.97181	1.51467	1.63063e+09	15.3542	0.262669	0.300398	25.7447	1.97761	2.08304	0.160011	7.16495	0.550384	8.75861e+08
400	-113.4	32.44	2299.2	2310	25.9721	27.2707	0.216333	240	0	0	0	74.1865	Electricity Generation	6.33287e+10	Hugo	OK	0.0487864	100	8.57793	3.43118	1.17868	16.8012	29.0742	1184.96	83.0802	173.579	-387.164	31.5851	59.9459	78.3018	36.0224	47.3279	200.818	233.22	65.0251	2.82816	18.9705	8.25092	2.47407e+09	26.2827	0.251106	0.287174	66.1039	2.87508	21.1504	0.919901	175.165	7.61852	1.3288e+09
949	-96.1	30.44	4634.56	2565	24.6596	25.8925	0.413933	528	0	0	0	11.2015	Pulp and Paper Manufacturing	7.81368e+10	GEORGIA-PACIFIC PORT HUDSON OPERATIONS	LA	0.0549757	1.80502	8.5674	3.45973	1.19228	16.8297	29.0878	1199.07	83.9549	175.421	-385.309	33.4269	60.6814	78.9902	32.8182	47.6279	202.66	235.062	81.4297	1.75701	5.02228	1.08366	4.73389e+09	17.2014	0.246957	0.282429	83.4969	1.80162	5.20944	0.112404	10.529	0.227186	2.54269e+09
1777	-99	28.94	1947.45	4102	25.9031	27.1983	0.182626	255	0	6.47	25.5	5.07788	Electricity Generation	3.87698e+10	W A PARISH	TX	0.0922816	39.1895	8.5727	3.46483	1.21731	16.8348	29.1128	1168.33	81.7089	175.738	-385.014	33.7439	58.8676	77.2065	35.6257	46.8486	202.977	235.379	40.1823	2.06333	8.93465	4.58787	2.08858e+09	19.239	0.238441	0.27269	41.0909	2.10998	9.72138	0.499185	60.6671	3.1152	1.12159e+09
1934	-98.9	28.69	2000.84	2538	26.2709	27.5844	0.19085	1000	0	7.24	29	23.0771	Electricity Generation	4.11039e+10	W A PARISH	TX	0.0543204	39.1895	8.6182	3.48493	1.23606	16.8549	29.1316	1247.03	88.1378	188.681	-372.075	46.6879	64.2805	83.6297	37.5891	49.6695	215.921	248.323	42.6111	2.12966	7.77656	3.88664	2.18262e+09	19.5229	0.273251	0.3125	43.5613	2.17715	8.56388	0.428014	61.8136	3.08938	1.17231e+09
3039	-98.8	26.44	1307.81	4930	28.6166	30.0474	0.135732	171	8.1	7.4	26.5	29.9165	Electricity Generation	3.01987e+10	MANATEE	FL	0.112379	100	8.52064	3.4886	1.25112	16.8586	29.1467	1160.69	80.8748	164.695	-396.09	22.701	58.3151	76.1657	35.3383	46.3976	191.934	224.336	31.228	2.38781	13.4215	10.2626	1.55228e+09	20.1175	0.234303	0.267957	31.9002	2.43921	14.8287	1.13385	111.435	8.5207	8.33489e+08
3017	-98	26.44	1221.82	2063.29	28.3753	29.794	0.12641	240	0	8.1	29.2	10.3539	Electricity Generation	2.61212e+10	J T DEELY	TX	0.0427983	100	8.57393	3.48974	1.25492	16.8597	29.1505	1157.14	80.6076	171.054	-389.734	29.0605	58.0897	76.4895	35.3914	46.5404	198.293	230.695	27.1237	2.21994	10.3922	8.50551	1.44567e+09	18.762	0.232453	0.265841	27.7511	2.27129	11.6632	0.954574	101.668	8.32105	7.76539e+08
2530	-99.4	27.81	1521.15	3565.02	27.5699	28.9484	0.152101	505	0	7.6	28	20.4095	Stationary Combustion	3.41789e+10	J K SPRUCE	TX	0.0792481	10.3795	8.59509	3.49376	1.2522	16.8638	29.1477	1197.66	84.0333	185.953	-374.813	43.9591	60.8762	79.7187	36.3463	47.9541	213.192	245.594	35.3589	2.32448	3.95503	2.60002	1.73948e+09	20.3272	0.251602	0.287741	36.1146	2.37417	4.17004	0.274137	15.4085	1.01295	9.34167e+08
2771	-99.5	28.94	1939.43	3496.14	25.8608	27.1538	0.181614	138	5.2	6.9	24.5	30.2381	Electricity Generation	4.18756e+10	W A PARISH	TX	0.0775761	9.53079	8.58965	3.50658	1.25923	16.8766	29.1548	1159.07	80.9352	202.587	-358.163	60.593	58.2029	76.4679	35.4225	46.524	229.826	262.228	43.2866	2.23193	4.62205	2.3832	2.077e+09	20.841	0.235506	0.269333	44.1908	2.27855	4.86226	0.250705	17.1841	0.886036	1.11543e+09
2379	-97.4	28.19	1062	2430	27.0203	28.3713	0.104374	60	0	7.2	0	25.7595	Petroleum and Natural Gas Systems	1.97912e+10	COPANO PROCESSING HOUSTON CENTRAL GAS PLT	TX	0.051699	1.44908	8.64082	3.52333	1.29634	16.8933	29.1919	948.719	69.3815	207.229	-353.542	65.2354	48.3551	64.7286	31.5381	41.3742	234.468	266.87	20.619	1.94153	1.17643	1.10775	1.19366e+09	17.2737	0.208314	0.238235	21.1379	1.99039	1.21814	0.114703	2.295	0.216102	6.41153e+08
1579	-99.4	29.31	4053.91	2829	24.749	25.9865	0.363646	2000	0	7.4	0	43.542	Electricity Generation	8.3668e+10	W A PARISH	TX	0.0613835	4.10697	8.60956	3.52666	1.26175	16.8967	29.1573	1378.02	98.98	203.912	-356.832	61.9182	73.3003	93.2646	40.8098	53.8968	231.151	263.553	86.5243	2.13434	6.40181	1.57917	4.15879e+09	20.8051	0.332195	0.37991	88.337	2.17906	6.65992	0.164284	17.2924	0.426562	2.23362e+09
1736	-99	29.06	1978.79	2132	25.4272	26.6986	0.182639	255	0	6.47	25.5	6.88828	Electricity Generation	3.91832e+10	W A PARISH	TX	0.044466	39.1895	8.62155	3.54283	1.29529	16.9128	29.1908	1164.96	81.4683	170.541	-390.206	28.5472	58.6328	77.3034	35.5645	46.8904	197.78	230.182	40.6354	2.05355	7.03384	3.55462	2.08873e+09	19.4546	0.237695	0.271837	41.5461	2.09957	7.77868	0.393103	58.7402	2.96849	1.12194e+09
1665	-81.3	28.19	1277.73	2080	28.5442	29.9715	0.13333	1230	0.9	7.9	22.6	14.1136	Stationary Combustion	2.02215e+10	R S NELSON	LA	0.0432039	0.605994	8.5259	3.54309	1.30625	16.9131	29.2018	1217.72	85.4596	178.525	-382.269	36.531	62.2669	81.1258	36.8536	48.5768	205.764	238.166	21.2855	1.66588	0.97862	0.765904	1.52481e+09	13.9594	0.255213	0.291871	21.9469	1.71764	1.01515	0.0794493	1.59046	0.124475	8.19081e+08
390	-112.1	32.69	3246.86	2890	24.3373	25.5542	0.285676	240	0	0	0	45.6026	Electricity Generation	8.83652e+10	Hugo	OK	0.0628641	100	8.61152	3.55345	1.29383	16.9235	29.1894	1192.26	83.7848	174.853	-385.877	32.8591	60.4784	79.1485	36.2249	47.6974	202.092	234.494	90.5755	2.78963	26.556	8.17898	3.2671e+09	27.7235	0.255948	0.292711	92.0013	2.83354	29.4522	0.907097	232.812	7.17038	1.75453e+09
2766	-99.8	28.94	1962.33	3599.47	25.724	27.0103	0.182737	197	5.7	7.9	30.2	57.629	Electricity Generation	4.29254e+10	W A PARISH	TX	0.0800841	9.53079	8.6327	3.56193	1.31439	16.9319	29.2099	1168.66	81.696	168.607	-392.142	26.6131	58.8372	77.1578	35.5448	46.8267	195.846	228.248	44.3415	2.25964	4.82291	2.45775	2.08985e+09	21.2176	0.239843	0.274293	45.2512	2.306	5.06685	0.258206	17.4646	0.889995	1.1223e+09
2749	-99.5	28.81	2746.54	2275	25.9027	27.1979	0.258168	2000	0	7.85	34.5	37.2716	Electricity Generation	5.92798e+10	W A PARISH	TX	0.0479369	9.53079	8.67078	3.57396	1.3168	16.944	29.2123	1372.74	98.5215	173.209	-387.541	31.2152	72.9421	92.8833	40.7539	53.7306	200.448	232.85	61.3234	2.23275	4.73651	1.72454	2.9525e+09	20.77	0.32971	0.377069	62.6099	2.27959	5.04026	0.183513	22.5587	0.821351	1.58585e+09
2804	-99.5	29.19	2209.7	2030	25.0717	26.3253	0.201054	223	2.1	6.8	32.2	39.8458	Electricity Generation	4.8222e+10	W A PARISH	TX	0.0419903	4.52504	8.62535	3.58781	1.3374	16.9578	29.2329	1169.19	81.7924	209.588	-351.158	67.5946	58.8916	77.3568	35.6648	46.9136	236.828	269.229	49.8176	2.2545	2.75624	1.24734	2.29933e+09	21.6661	0.241029	0.27565	50.8202	2.29987	2.88786	0.130691	9.36542	0.423833	1.23505e+09
180	-112.9	33.31	2484.18	3392.81	25.6272	26.9086	0.229721	337	0	0	0	4.03131	Stationary Combustion	6.58108e+10	GOAL LINE LP	CA	0.0750681	100	8.70616	3.59807	1.34393	16.9681	29.2395	1199	84.3856	175.994	-384.735	34.0002	60.9849	79.9669	36.3983	48.0564	203.233	235.635	67.5798	2.72041	21.849	8.79524	2.62718e+09	25.7234	0.257399	0.294371	68.7261	2.76655	24.1909	0.973797	187.711	7.55626	1.41081e+09
2486	-80.4	26.81	998.379	20300	30.6388	32.1707	0.109934	215	0	7.9	0	4.81696	Electricity Generation	1.59527e+10	HINES ENERGY COMPLEX	FL	0.485437	0.719073	8.68282	3.59868	1.36956	16.9687	29.2651	1206.02	84.0909	145.326	-415.496	3.33224	61.4688	79.5599	36.1351	47.8944	172.565	204.967	17.3569	1.73851	8.48339	8.49717	1.25724e+09	13.8055	0.245357	0.280599	18.0176	1.80468	8.81177	0.882608	9.37359	0.93888	6.74085e+08
2782	-99.9	29.06	2187.19	4860.1	25.4725	26.7461	0.201211	295	6.1	6.8	26.6	65.6361	Electricity Generation	4.78859e+10	W A PARISH	TX	0.110682	9.53079	8.63359	3.61054	1.36012	16.9805	29.2557	1185.7	83.0883	169.397	-391.349	27.4038	60.0054	78.4618	35.9098	47.3989	196.637	229.039	49.412	2.25915	6.86945	3.14076	2.30112e+09	21.473	0.247239	0.282752	50.4127	2.3049	7.16832	0.32774	20.8171	0.951771	1.23555e+09
2215	-98.4	28.31	1089.89	3300	26.7755	28.1143	0.105902	130	0	7.1	0	9.93823	Petroleum and Natural Gas Systems	2.28652e+10	TARGA MIDSTREAM SERVICES LLC - VENICE GAS PROCESSING PLANT	LA	0.0728155	10.9862	8.70801	3.61208	1.38448	16.9821	29.28	961.679	70.4973	165.888	-394.876	23.8941	49.2654	65.707	31.8834	41.8025	193.127	225.529	23.6919	2.17378	2.57478	2.36242	1.21114e+09	19.5616	0.21592	0.246934	24.2183	2.22209	2.72748	0.250252	11.0102	1.01021	6.50456e+08
150	-112.8	33.56	2534.24	3240	25.0676	26.321	0.229087	240	0	0	0	17.892	Electricity Generation	6.55456e+10	Comanche (8059)	OK	0.0713592	100	8.71266	3.6122	1.35814	16.9822	29.2537	1185.53	83.3017	173.909	-386.811	31.9151	60.0414	78.5294	36.0777	47.4237	201.148	233.55	67.317	2.6563	21.5333	8.49692	2.61993e+09	25.6943	0.251646	0.287792	68.4615	2.70146	23.865	0.941702	186.938	7.37648	1.40695e+09
2947	-99.3	27.31	1902.75	2382	27.9104	29.3059	0.19302	2000	2.3	8.3	28.4	29.2111	Stationary Combustion	4.77886e+10	J K SPRUCE	TX	0.050534	10.3795	8.68248	3.61401	1.36481	16.984	29.2603	1391.74	100.026	182.447	-378.325	40.4529	74.262	94.2879	41.1107	54.351	209.686	242.088	49.306	2.5913	3.9547	2.07841	2.20745e+09	22.3362	0.338726	0.387379	50.2655	2.64173	4.20024	0.220745	18.4639	0.970381	1.18563e+09
95	-114.8	33.56	2912.32	5530	25.4603	26.7334	0.26609	472	0	7.9	40	7.48993	Electricity Generation	8.32218e+10	JEFFERIES	SC	0.126942	100	8.65944	3.62709	1.36918	16.9971	29.2647	1240.65	87.7667	182.523	-378.206	40.5291	63.856	82.4359	34.5111	49.1402	209.762	242.164	85.6821	2.94206	30.3084	10.407	3.0431e+09	28.1562	0.276621	0.316354	86.9227	2.98466	33.0702	1.13553	222.403	7.63665	1.63351e+09
1420	-98.1	29.44	2249.8	8249	25.1457	26.403	0.203344	79	4.3	7.1	26.7	14.4531	Electricity Generation	4.27009e+10	HAYS ENERGY PROJECT	TX	0.192937	1.09669	8.65591	3.63217	1.38146	17.0022	29.277	1163.19	81.2421	170.265	-390.479	28.2717	58.503	76.7128	35.3519	46.6306	197.505	229.907	44.5936	1.98211	8.7666	3.89661	2.32552e+09	19.1758	0.235201	0.268984	45.5612	2.02512	8.97509	0.398928	10.5617	0.469448	1.24816e+09
857	-95.9	30.81	2513.29	4213	24.5133	25.739	0.222486	538	0	7.4	22	13.6826	Electricity Generation	4.03188e+10	S O PURDOM	FL	0.0949757	1.05062	8.71083	3.63445	1.38119	17.0045	29.2767	1188.92	83.5155	174.436	-386.285	32.4427	60.2796	79.2179	36.1645	47.7264	201.676	234.078	42.0585	1.67344	4.16524	1.65728	2.54443e+09	16.5297	0.246302	0.28168	43.1692	1.71763	4.29369	0.170839	5.95763	0.237045	1.36644e+09
1873	-98.6	28.81	1798.36	2828	26.0521	27.3547	0.170018	400	0	8.2	27.3	25.7474	Electricity Generation	3.6025e+10	BAYSIDE POWER STATION	FL	0.0613592	11.0304	8.6533	3.63844	1.39317	17.0084	29.2887	1181.44	82.7492	196.692	-364.063	54.6981	59.7512	78.2884	36.0135	47.3243	223.931	256.333	37.3635	2.07764	3.66211	2.03636	1.94438e+09	19.2161	0.244193	0.279268	38.2099	2.1247	3.89847	0.216779	17.2499	0.959201	1.04432e+09
97	-114.6	33.69	2169.18	2160	25.05	26.3026	0.196514	38	0	7.3	23	1.34903	Electricity Generation	5.98717e+10	JEFFERIES	SC	0.0451456	100	8.72467	3.64764	1.3979	17.0176	29.2934	1154.56	80.748	169.049	-391.676	27.0553	57.9205	76.3106	35.3321	46.4507	196.288	228.69	61.4175	2.83137	17.1236	7.89405	2.24741e+09	27.3281	0.239457	0.273852	62.3996	2.87665	19.1005	0.880541	159.007	7.3303	1.20708e+09
1825	-99.5	28.81	1755.37	2275	25.9027	27.1979	0.165	72	0	7.3	23	34.558	Electricity Generation	3.7887e+10	W A PARISH	TX	0.0479369	9.53079	8.65004	3.65019	1.40589	17.0202	29.3014	1148.32	80.0517	252.697	-308.053	110.703	57.4568	76.0083	35.1532	46.3224	279.936	312.338	39.1931	2.23275	3.02721	1.72454	1.887e+09	20.77	0.230977	0.264153	40.0153	2.27959	3.22134	0.183513	14.4178	0.821351	1.01355e+09
1003	-91.8	30.19	1561.16	3190	25.8444	27.1366	0.146583	240	0	0	0	15.8219	Electricity Generation	1.9209e+10	BIG CAJUN 2	LA	0.0701456	0.322612	8.65953	3.65225	1.41198	17.0223	29.3075	1143.41	79.6468	167.151	-393.594	25.1578	57.1365	75.5245	35.058	46.1092	194.391	226.793	20.3781	1.30532	1.46397	0.937745	1.67637e+09	12.1561	0.222855	0.254865	21.1086	1.35211	1.51987	0.0973548	1.85656	0.118922	9.00424e+08
1995	-96.8	28.56	1571.82	2304.39	27.2459	28.6082	0.155736	2000	0	0	0	4.13848	Petroleum Refining	2.68455e+10	HOUSTON REFINING	TX	0.0486504	0.654027	8.69177	3.66476	1.42239	17.0348	29.3179	1272.25	91.0322	184.216	-376.55	42.2225	66.793	78.0879	38.8955	47.2381	211.456	243.857	28.0864	1.78688	1.4408	0.916645	1.78105e+09	15.7696	0.291965	0.333902	28.8612	1.83617	1.48852	0.0947004	2.21374	0.14084	9.5669e+08
1558	-97.8	29.31	1919.84	2132.18	25.3023	26.5674	0.176367	69	5.4	6.9	23.8	4.32743	Petrochemical Production	3.61745e+10	OXY VINYLS LP - DEER PARK VCM FACILITY	TX	0.0444703	0.97372	8.67514	3.66743	1.42099	17.0374	29.3165	1112.79	78.1169	163.767	-396.981	21.7736	55.7877	75.2576	35.0728	45.9924	191.007	223.408	37.5786	1.95738	1.79654	0.935777	2.017e+09	18.631	0.22516	0.257501	38.4579	2.00318	1.85255	0.0964948	3.07529	0.160184	1.08342e+09
1955	-80.4	27.44	875.066	2540	32.0886	33.693	0.102655	1100	0	7.7	24.4	9.93219	Electricity Generation	1.64209e+10	SAM BERTRON	TX	0.0543689	0.552446	8.71684	3.67182	1.44556	17.0418	29.3411	1211.65	84.8688	183.857	-376.959	41.8632	61.8525	71.9143	36.73	44.5368	211.096	243.498	17.2338	1.96943	0.978397	1.11808	1.174e+09	14.6795	0.252082	0.28829	17.7416	2.02745	1.01159	0.115601	1.41537	0.161745	6.30605e+08
1471	-97.1	29.31	1322.83	4371	25.3146	26.5803	0.121258	51	0	7	0	3.65008	Stationary Combustion	2.35359e+10	MBI NGLP MONT BELVIEU PLANT	TX	0.0988107	0.860538	8.66726	3.67625	1.44307	17.0462	29.3386	953.327	69.8718	146.077	-414.673	4.08373	48.6953	65.1551	31.6695	41.5577	173.317	205.719	24.4753	1.85022	2.49463	1.88582	1.38675e+09	17.6494	0.211261	0.241606	25.0786	1.89583	2.56448	0.193863	3.30725	0.250013	7.44698e+08
1576	-81.3	28.19	1050.23	2080	28.5442	29.9715	0.10959	1230	0.9	7.9	22.6	6.18403	Stationary Combustion	1.66211e+10	R S NELSON	LA	0.0432039	0.605994	8.76232	3.68072	1.45165	17.0507	29.3472	1217.4	85.4437	178.49	-382.304	36.4965	62.2531	73.1302	36.8087	45.0667	205.729	238.131	17.4956	1.66588	0.804376	0.765904	1.25332e+09	13.9594	0.255128	0.291773	18.0392	1.71764	0.834401	0.0794493	1.30727	0.124475	6.73243e+08
873	-97.1	30.69	3825.48	2841.71	24.4721	25.6957	0.338469	2000	0	7.6	51	13.3947	Stationary Combustion	7.03095e+10	PUTNAM	FL	0.061692	2.27079	8.71883	3.68728	1.42386	17.0573	29.3194	1350.68	96.8221	199.803	-360.919	57.8098	71.4437	91.3281	40.1216	53.043	227.043	259.445	72.986	1.90789	5.06394	1.32374	3.87086e+09	18.8553	0.319217	0.365068	74.6773	1.9521	5.24386	0.137077	10.7158	0.280116	2.07903e+09
2884	-97.4	27.44	918.301	2687	30.1041	31.6093	0.100579	100	0	6.93	25.1	11.262	Electricity Generation	1.68639e+10	O W SOMMERS	TX	0.0579369	5.00596	8.71724	3.69821	1.47284	17.0682	29.3684	1135.52	78.8272	179.801	-380.984	37.8069	56.5967	74.4454	34.7572	45.6425	207.04	239.442	17.6613	1.92325	1.39093	1.51467	1.15026e+09	15.3542	0.220092	0.251705	18.1604	1.97761	1.46938	0.160011	5.05418	0.550384	6.17836e+08
2057	-82.1	27.56	950.911	4474.33	28.7796	30.2185	0.0999907	240	0	0	0	13.9122	Electricity Generation	1.50031e+10	OSPREY ENERGY CENTER	FL	0.101319	0.43467	8.72396	3.69859	1.4735	17.0686	29.369	1145.78	79.5325	167.595	-393.212	25.6012	57.3024	75.4907	35.1198	46.1052	194.834	227.236	15.7817	1.65964	1.63072	1.7149	1.14353e+09	13.8009	0.223203	0.255263	16.276	1.71162	1.68508	0.177206	1.99448	0.209744	6.14127e+08
2031	-98	28.56	1194.44	2580	25.7637	27.0518	0.111775	230	0	7.7	0	13.3623	Stationary Combustion	2.45301e+10	EQUISTAR CHEMICALS LAPORTE COMPLEX	TX	0.0553398	3.09737	8.78902	3.70197	1.47208	17.072	29.3676	1004.52	73.1011	158.893	-401.867	16.8991	51.4662	71.5016	32.1954	44.3456	186.132	218.534	25.4114	2.12747	1.65909	1.38901	1.2783e+09	19.879	0.224223	0.25643	25.9677	2.17404	1.72393	0.144329	4.18879	0.35069	6.86587e+08
1973	-98.4	28.56	1277.35	8150	26.4974	27.8223	0.121831	200	0	8.4	0	23.0469	Stationary Combustion	2.61912e+10	EQUISTAR CHEMICALS LAPORTE COMPLEX	TX	0.190534	10.9862	8.68211	3.7146	1.48125	17.0846	29.3768	1015.86	73.8862	181.864	-378.897	39.8707	52.2388	67.3207	33.9311	42.5104	209.104	241.506	27.3681	2.14257	6.19199	4.84753	1.3933e+09	19.6427	0.227629	0.260325	27.9764	2.19019	6.43875	0.504071	15.9611	1.24955	7.47812e+08
2272	-98.4	28.31	1065.62	3300	26.7755	28.1143	0.103544	301	0	7.4	0	7.51523	Petroleum and Natural Gas Systems	2.23561e+10	TARGA MIDSTREAM SERVICES LLC - VENICE GAS PROCESSING PLANT	LA	0.0728155	10.9862	8.7641	3.7182	1.49156	17.0882	29.3871	980.529	72.0495	150.42	-410.344	8.42627	50.5688	68.7673	32.338	43.146	177.659	210.061	23.1644	2.17378	2.51745	2.36242	1.18417e+09	19.5616	0.224218	0.256423	23.6791	2.22209	2.66675	0.250252	10.765	1.01021	6.35973e+08
800	-96.4	30.81	2200.31	2039	24.3166	25.5325	0.193737	54	0	5.3	23	9.44963	Stationary Combustion	3.82472e+10	Permian Basin	TX	0.0422087	1.80502	8.76789	3.72649	1.47717	17.0965	29.3727	1142.64	79.7503	167.178	-393.545	25.1844	57.0902	75.6837	35.0133	46.1751	194.417	226.819	39.7976	1.80873	1.93518	0.879503	2.21564e+09	17.9621	0.227496	0.260173	40.7663	1.85275	2.01049	0.091373	4.5004	0.204535	1.19014e+09
1565	-98.8	29.19	1872.71	4694.77	25.4152	26.686	0.172107	102	1.1	6.8	25.1	18.9537	Stationary Combustion	3.64463e+10	CHANNEL ENERGY CENTER	TX	0.106669	11.0304	8.71432	3.73877	1.49312	17.1088	29.3887	1154.02	80.5343	168.803	-391.943	26.8098	57.866	75.9792	35.189	46.309	196.043	228.445	37.7667	2.01669	5.41489	2.89148	1.96828e+09	19.1877	0.232077	0.265412	38.6229	2.06241	5.69255	0.303974	19.2049	1.02552	1.05691e+09
3013	-98	26.56	1139.51	2082	28.3908	29.8103	0.11794	950	0	0	0	16.2493	Electricity Generation	2.37592e+10	J T DEELY	TX	0.0432524	100	8.8037	3.74747	1.51539	17.1175	29.4109	1228.42	86.4521	168.765	-392.022	26.7711	63.0035	83.1458	37.084	49.4623	196.004	228.406	24.6951	2.16716	9.6809	8.49564	1.3488e+09	18.309	0.263355	0.301182	25.2806	2.21854	10.867	0.953652	94.8411	8.32294	7.24505e+08
656	-102.8	31.31	5880.52	10887	23.8162	25.007	0.498578	2000	0	0	0	19.6272	Stationary Combustion	1.389e+11	ATLAS MIDKIFF GAS PROCESSING PLANT	TX	0.256966	100	8.73034	3.7504	1.47966	17.1204	29.3752	1300.42	98.5547	200.683	-360.027	58.6899	72.634	101.463	43.4329	57.4902	227.923	260.325	144.209	2.45231	73.4664	12.4932	5.70192e+09	25.2913	0.369652	0.422747	146.984	2.4995	79.0379	1.34406	433.613	7.37372	3.05917e+09
2377	-97.4	28.06	3266.36	36000	27.6416	29.0236	0.315155	936	0	7.9	0	22.7928	Petroleum and Natural Gas Systems	6.10444e+10	COPANO PROCESSING HOUSTON CENTRAL GAS PLT	TX	0.866505	3.3567	8.70901	3.75971	1.49792	17.1297	29.3935	1223.93	91.5339	244.442	-316.334	102.448	67.3518	94.5356	41.2179	54.4606	271.681	304.083	67.6888	2.0723	59.4252	18.1931	3.60423e+09	18.7804	0.325502	0.372256	69.5874	2.13042	61.1714	1.87277	68.6769	2.10255	1.92914e+09
780	-96.9	30.94	2262.14	2331.95	24.3798	25.5988	0.199451	20	1.7	6.2	21	24.8972	Electricity Generation	4.04994e+10	Odessa-Ector Generating Station	TX	0.0493192	2.27079	8.73423	3.77112	1.52094	17.1411	29.4165	1141.21	79.6359	166.952	-393.766	24.9583	56.9758	65.4231	34.9814	41.6698	194.191	226.593	42.0893	1.8606	2.40656	1.06384	2.28099e+09	18.4522	0.227146	0.259772	43.0869	1.9047	2.50032	0.110529	5.72499	0.253078	1.22519e+09
1521	-99.9	29.31	3287.96	9799.28	24.1847	25.3939	0.284512	240	0	0	0	74.517	Electricity Generation	7.13211e+10	W A PARISH	TX	0.230565	4.52504	8.7393	3.80267	1.54316	17.1727	29.4387	1219.24	85.7317	178.965	-381.776	36.9713	62.3112	80.1275	36.6831	48.1291	206.204	238.606	74.2834	2.25926	18.0673	5.495	3.25379e+09	22.8298	0.261436	0.298987	75.8743	2.30764	18.5597	0.564474	27.7161	0.842958	1.74582e+09
2478	-97.6	28.19	1105.96	3606	26.5946	27.9243	0.106784	198	0	7.16	24	28.0689	Petroleum and Natural Gas Systems	2.13839e+10	YOAKUM CRYOGENIC PLANT	TX	0.0802427	3.09737	8.83724	3.81388	1.58592	17.1839	29.4815	967.214	70.9021	187.773	-372.996	45.7793	49.6292	66.0333	31.976	41.9466	215.012	247.414	22.2165	2.0088	2.02425	1.83031	1.22122e+09	18.1921	0.217058	0.248236	22.747	2.05676	2.09932	0.189819	4.45387	0.402715	6.55859e+08
2994	-80.5	25.44	683.451	5321.64	33.5579	35.2358	0.0838837	1333	0	0	24.8	17.7815	Electricity Generation	1.18673e+10	MIDULLA GENERATING STATION	FL	0.121884	0.626237	8.67617	3.82438	1.60752	17.1944	29.5031	1221.32	85.4665	163.485	-397.355	21.491	62.5115	81.0364	34.2522	48.5456	190.724	223.126	12.5149	1.83114	1.56374	2.288	9.59324e+08	13.0456	0.253795	0.290249	12.9278	1.89155	1.61922	0.236918	1.99315	0.29163	5.15165e+08
2238	-80.5	27.06	783.701	2390	30.4985	32.0235	0.0875936	240	0	0	0	11.7079	Stationary Combustion	1.22083e+10	GUADALUPE GENERATING STATION	TX	0.0507282	0.725088	8.69612	3.82544	1.60646	17.1954	29.502	1137.83	78.8245	147.361	-413.458	5.36764	56.756	74.9748	34.8077	45.8811	174.601	207.003	12.9046	1.64663	0.701011	0.894488	1.00175e+09	12.8821	0.218814	0.250244	13.3378	1.7019	0.729236	0.0930503	1.18146	0.150755	5.38101e+08
1891	-98.4	28.69	2017.21	3845	26.384	27.7032	0.192882	2000	0	7.6	27	5.77231	Electricity Generation	4.08034e+10	BAYSIDE POWER STATION	FL	0.0860437	11.0304	8.8197	3.83213	1.58295	17.2021	29.4785	1357.38	97.2021	198.346	-362.412	56.3519	71.914	91.7133	40.3484	53.2184	225.585	257.987	42.3	2.09695	5.19335	2.57452	2.20587e+09	19.1761	0.321224	0.367363	43.2591	2.1445	5.48488	0.271904	20.63	1.0227	1.18462e+09
3007	-97.9	26.44	1065.39	2455.95	28.5191	29.945	0.110765	900	0	7.7	0	19.9594	Electricity Generation	2.16618e+10	J T DEELY	TX	0.0523288	6.29155	8.84819	3.83419	1.60468	17.2042	29.5002	1220.93	85.8066	166.405	-394.384	24.4117	62.4824	73.2275	36.8943	45.1087	193.645	226.047	22.5371	2.11538	1.68825	1.58463	1.26675e+09	17.7913	0.259487	0.296759	23.0866	2.16696	1.78557	0.167598	6.74725	0.633312	6.80404e+08
1684	-97.3	29.06	1390.95	2295	25.4503	26.7229	0.128583	30	0	6.9	0	7.79639	Petroleum and Natural Gas Systems	2.51e+10	SABINE PASS LNG LP - SABINE PASS LNG IMPORT TERMINAL	LA	0.0484223	1.32792	8.80735	3.84583	1.61037	17.2158	29.5059	947.963	69.4282	145.216	-415.536	3.22235	48.3209	64.7319	31.5689	41.3723	172.455	204.857	26.1225	1.87803	1.38961	0.999033	1.47052e+09	17.7642	0.209108	0.239143	26.7632	1.92409	1.43743	0.103342	2.65315	0.190744	7.89871e+08
694	-96.9	31.19	3618.93	2013	23.9177	25.1136	0.313014	2000	0	6.2	0	23.202	Electricity Generation	6.46337e+10	Odessa-Ector Generating Station	TX	0.0415777	2.9517	8.82688	3.86272	1.60099	17.2327	29.4965	1346.46	96.5207	199.185	-361.528	57.191	71.1425	91.0772	40.0473	52.931	226.424	258.826	67.1395	1.85523	3.46622	0.957804	3.57974e+09	18.7554	0.317735	0.363374	68.7066	1.89854	3.62231	0.100094	10.2008	0.281873	1.92286e+09
644	-96.6	31.19	2403.5	3884	23.824	25.0152	0.206458	32	0	6.7	20	10.4729	Electricity Generation	4.2662e+10	Odessa-Ector Generating Station	TX	0.0869903	2.16812	8.8105	3.86781	1.61663	17.2378	29.5122	1146.44	80.1127	167.845	-392.866	25.8513	57.351	75.7646	35.1202	46.2083	195.084	227.486	44.2741	1.84206	4.1783	1.73842	2.36113e+09	18.7512	0.229702	0.262695	45.3062	1.88501	4.31207	0.179407	7.49851	0.311982	1.268e+09
1859	-98.4	28.81	2052.89	3080	26.1758	27.4846	0.19491	2000	0	7.6	27	9.16935	Electricity Generation	4.1349e+10	BAYSIDE POWER STATION	FL	0.0674757	11.0304	8.83113	3.86806	1.61856	17.2381	29.5141	1354.74	97.0044	168.666	-392.089	26.6725	71.7283	91.5313	37.0813	53.138	195.905	228.307	42.878	2.08867	4.46326	2.17413	2.22906e+09	19.2359	0.320351	0.366365	43.8482	2.13592	4.74009	0.230898	20.0459	0.97647	1.19718e+09
2094	-98.3	28.44	1305.27	3089	26.3427	27.6598	0.124779	1152	0	7.3	0	13.0776	Stationary Combustion	2.82184e+10	EQUISTAR CHEMICALS LAPORTE COMPLEX	TX	0.0676942	12.3906	8.79787	3.87851	1.64421	17.2485	29.5397	1113.29	82.0369	167.12	-393.642	25.1267	58.9732	85.3117	37.6248	50.4088	194.36	226.762	29.1935	2.23659	3.10529	2.37904	1.42702e+09	20.4576	0.2723	0.311412	29.814	2.28413	3.29928	0.252766	14.306	1.09602	7.66409e+08
2823	-99.3	27.69	1455.12	2683.27	27.6518	29.0344	0.14616	1235	0	8.05	33.3	21.1925	Stationary Combustion	3.39118e+10	J K SPRUCE	TX	0.0578464	10.3795	8.78294	3.87885	1.63868	17.2488	29.5342	1284.36	91.1726	210.624	-350.144	68.6304	66.8592	86.1337	36.747	50.7708	237.863	270.265	35.0589	2.40934	3.13591	2.15508	1.67154e+09	20.974	0.290387	0.332097	35.7855	2.45928	3.32712	0.228649	14.1277	0.970898	8.97775e+08
2205	-80.4	27.19	1555.47	35119	32.412	34.0326	0.177706	1320	0	7.4	29.1	17.6382	Stationary Combustion	2.6797e+10	GUADALUPE GENERATING STATION	TX	0.845121	0.725088	8.73076	3.89127	1.6447	17.2613	29.5402	1405.82	100.148	147.635	-413.19	5.64142	75.2452	95.2074	38.4001	54.7642	174.874	207.276	30.3221	1.94938	25.7199	16.5351	2.03232e+09	14.92	0.329571	0.37691	31.429	2.02054	26.6677	1.71444	27.5819	1.77322	1.08778e+09
1987	-82.1	27.81	822.737	2890	28.6646	30.0978	0.0862478	240	0	0	0	15.2627	Cement Production	1.29609e+10	ALAMO SAN ANTONIO CEMENT PLANT	TX	0.0628641	0.526669	8.74359	3.89963	1.6814	17.2696	29.5769	1045.35	74.3402	162.714	-398.087	20.7206	52.7773	65.4183	31.6787	41.6824	189.954	222.355	13.6434	1.65829	0.890849	1.08279	9.86361e+08	13.832	0.21464	0.24547	14.0706	1.71021	0.922174	0.112086	1.24559	0.151395	5.29803e+08
1443	-97.4	29.44	1649.28	3850	25.3848	26.6541	0.151637	2000	0	7.66	51.1	6.25814	Petroleum and Natural Gas Systems	3.08765e+10	DISCOVERY PRODUCER SERVICES LLC - LAROSE GAS PROCESSING PLANT	LA	0.086165	0.97372	8.82288	3.9002	1.65875	17.2702	29.5543	1158.29	86.6974	178.23	-382.518	36.2363	62.8383	91.2555	40.0911	53.0157	205.469	237.871	32.0566	1.94367	2.86999	1.74015	1.73418e+09	18.4852	0.301838	0.345193	32.8115	1.98944	2.94954	0.178838	4.00061	0.242567	9.31315e+08
1757	-99	28.94	1551.34	4102	25.9031	27.1983	0.14548	255	0	6.47	25.5	5.60834	Electricity Generation	3.0884e+10	W A PARISH	TX	0.0922816	39.1895	8.80949	3.9034	1.6634	17.2734	29.5589	1168.36	81.7107	171.052	-389.699	29.0583	58.8691	77.2989	35.6267	46.8892	198.291	230.693	32.0092	2.06333	7.11735	4.58787	1.66376e+09	19.239	0.23845	0.2727	32.733	2.10998	7.74406	0.499185	48.3275	3.1152	8.93459e+08
1735	-99	28.94	1543.14	4102	25.9031	27.1983	0.144711	255	0	6.47	25.5	4.76559	Electricity Generation	3.07207e+10	W A PARISH	TX	0.0922816	39.1895	8.81575	3.92553	1.68572	17.2955	29.5813	1168.33	81.7089	171.048	-389.703	29.0545	58.8676	77.3363	35.6241	46.9056	198.287	230.689	31.84	2.06333	7.07971	4.58787	1.65497e+09	19.239	0.238441	0.27269	32.5599	2.10998	7.70311	0.499185	48.0719	3.1152	8.88735e+08
302	-111.5	33.06	1856.11	2345.73	25.3655	26.6338	0.170193	168	0	0	24	6.19469	Stationary Combustion	4.78699e+10	EFFINGHAM COUNTY POWER, LLC	GA	0.0496536	100	8.82369	3.92682	1.68151	17.2968	29.5771	1170.07	82.0303	171.488	-389.235	29.494	58.9864	77.4425	35.7128	46.9471	198.727	231.129	49.2091	2.65119	14.8721	8.01251	1.94639e+09	25.2822	0.2448	0.279962	50.0597	2.69702	16.588	0.893694	137.755	7.42168	1.04539e+09
2941	-99.4	27.31	1723.03	13815.4	27.9433	29.3405	0.171388	143	0	7.4	0	20.7917	Stationary Combustion	4.21899e+10	J K SPRUCE	TX	0.328043	10.3795	8.80919	3.94087	1.69539	17.3109	29.5909	1234.45	86.8532	164.58	-396.19	22.5862	63.4151	81.0096	36.8645	48.5215	191.819	224.221	44.5481	2.58545	15.9128	9.23537	1.96005e+09	22.728	0.266199	0.304434	45.5174	2.64171	16.4034	0.952012	29.0485	1.6859	1.05109e+09
1578	-99.4	29.19	2487.96	2207.95	25.1517	26.4093	0.227041	2000	0	7.4	0	40.4491	Electricity Generation	5.24704e+10	W A PARISH	TX	0.0463095	4.10697	8.89484	3.95504	1.70122	17.325	29.5968	1375.31	98.7575	203.479	-357.266	61.4858	73.1166	93.1544	40.7183	53.8488	230.719	263.121	54.2697	2.1813	3.19415	1.28384	2.59652e+09	20.9009	0.331136	0.378699	55.4018	2.2268	3.33832	0.134179	9.97718	0.401019	1.39466e+09
1025	-96.9	30.19	1433.55	2242.4	24.779	26.018	0.128677	66	2.7	6.6	25.5	13.2454	Petroleum and Natural Gas Systems	2.66519e+10	TARGA MIDSTREAM SERVICES LLC - LOWRY GAS PROCESSING PLANT	LA	0.0471456	1.93098	8.8782	3.96047	1.72497	17.3305	29.6205	954.682	70.0702	146.367	-414.364	4.3732	48.7792	65.2992	31.7357	41.6176	173.606	206.008	27.6767	1.93064	1.48629	1.03679	1.4716e+09	18.8072	0.213372	0.24402	28.3194	1.97547	1.54104	0.107498	3.31016	0.230906	7.90449e+08
2806	-100.3	29.31	2126.7	3292	24.2915	25.5061	0.187037	240	0	0	0	106.56	Electricity Generation	4.91807e+10	W A PARISH	TX	0.0726214	10.188	8.88871	3.9758	1.72755	17.3458	29.6231	1184.42	82.9787	179.614	-381.128	37.6208	59.8756	78.3851	35.9053	47.3645	206.854	239.256	50.6286	2.38062	5.06827	2.38316	2.13902e+09	23.6691	0.24867	0.284388	51.5605	2.42444	5.32315	0.250301	18.8878	0.888126	1.14872e+09
2785	-99.8	29.06	1727.04	4233.23	25.3754	26.6441	0.158431	420	4.1	7.9	26.5	57.5043	Electricity Generation	3.8155e+10	W A PARISH	TX	0.0954666	9.53079	8.90444	3.98536	1.74242	17.3554	29.638	1200.26	84.3072	175.182	-385.564	33.1887	61.0183	79.6099	36.5439	47.9028	202.422	234.824	39.3684	2.27954	4.86106	2.81468	1.81187e+09	21.728	0.254063	0.290556	40.1568	2.32519	5.08454	0.294408	15.8322	0.91673	9.72933e+08
1896	-96.5	28.69	1078.89	3082.82	26.9228	28.269	0.105528	276	2	6.7	22.2	9.18455	Petroleum Refining	1.78904e+10	VALERO REFINING HOUSTON REFINERY	TX	0.0675441	0.654027	8.92991	4.00058	1.77312	17.3706	29.6687	1124.31	78.9547	183.774	-376.989	41.7802	56.5775	76.1917	35.2265	46.4052	211.013	243.415	18.7248	1.73556	1.31515	1.21898	1.20686e+09	15.5153	0.227187	0.259819	19.2497	1.78421	1.35739	0.125814	1.84877	0.171358	6.48212e+08
434	-112.3	32.44	1961.39	2015.07	24.7268	25.9631	0.175836	240	0	0	0	57.877	Electricity Generation	4.56454e+10	Hugo	OK	0.0416279	100	8.86712	4.00734	1.761	17.3773	29.6565	1176.92	82.4774	172.403	-388.33	30.4093	59.4069	77.9283	35.9625	47.1622	199.642	232.044	47.0393	2.39826	14.799	7.54513	2.01093e+09	23.3918	0.246089	0.281436	47.9174	2.44303	16.5655	0.844581	141.758	7.22741	1.08012e+09
2750	-99.5	28.81	1388.35	2275	25.9027	27.1979	0.130502	60	0	6.8	24	38.8442	Electricity Generation	2.99655e+10	W A PARISH	TX	0.0479369	9.53079	8.90478	4.01212	1.77609	17.3821	29.6716	1147.11	79.9466	173.23	-387.52	31.2363	57.3688	75.8232	35.0957	46.2411	200.469	232.871	30.9985	2.23275	2.39427	1.72454	1.49246e+09	20.77	0.230415	0.263511	31.6488	2.27959	2.54781	0.183513	11.4033	0.821351	8.01636e+08
1605	-99.4	29.19	1651.38	2207.95	25.1517	26.4093	0.150698	220	0.7	7.3	27.7	45.0527	Electricity Generation	3.48271e+10	W A PARISH	TX	0.0463095	4.10697	8.89286	4.01568	1.77444	17.3857	29.67	1167.32	81.6277	170.846	-389.899	28.8528	58.7573	77.1943	35.7355	46.8422	198.086	230.488	36.0214	2.1813	2.12011	1.28384	1.72343e+09	20.9009	0.239565	0.273975	36.7728	2.2268	2.2158	0.134179	6.62232	0.401019	9.25702e+08
1520	-99.8	29.19	1856.86	4406	24.9962	26.246	0.167701	230	3.5	7.8	28.3	70.6411	Electricity Generation	4.15982e+10	W A PARISH	TX	0.0996602	4.52504	8.87022	4.02097	1.77615	17.391	29.6717	1179.98	82.63	172.79	-387.954	30.7967	59.6054	77.8415	35.792	47.1262	200.03	232.432	42.8761	2.30906	4.82721	2.59966	1.91789e+09	22.3559	0.245529	0.280796	43.7107	2.35401	4.98485	0.268456	10.386	0.559332	1.02982e+09
3038	-98.1	26.31	1007.77	5206	28.1599	29.5679	0.102893	100	0	7.03	26.2	2.72192	Stationary Combustion	2.39854e+10	HARDEE POWER STATION	FL	0.119078	100	8.93082	4.03019	1.80384	17.4002	29.6994	1154.67	80.3997	183.531	-377.256	41.5377	57.9272	76.9523	35.1897	46.7435	210.771	243.173	24.7588	2.45679	10.4622	10.3815	1.17673e+09	21.0404	0.232376	0.265754	25.268	2.50731	11.5318	1.14429	84.7608	8.41072	6.31799e+08
200	-112.6	33.19	1877.64	3255.03	25.6434	26.9256	0.17379	490	0	0	23.5	13.7752	Electricity Generation	4.8111e+10	Comanche (8059)	OK	0.0717241	100	8.90284	4.045	1.79904	17.415	29.6946	1217.66	85.9252	178.917	-381.809	36.9235	62.2629	81.3498	36.8069	48.6631	206.157	238.558	49.4562	2.63395	16.2386	8.6484	1.98753e+09	24.8832	0.265094	0.303171	50.3237	2.68016	18.0079	0.959071	141.719	7.54774	1.06735e+09
1594	-81	28.19	671.261	2080	31.1058	32.6611	0.0762547	240	0	0	0	5.39986	Electricity Generation	1.23875e+10	COTTONWOOD ENERGY PROJECT	TX	0.0432039	0.605994	8.92286	4.04852	1.8365	17.4185	29.732	1142.85	79.3494	166.756	-394.045	24.7622	57.1087	75.4684	34.9858	46.0944	193.995	226.397	12.995	1.93591	0.595179	0.886659	8.72076e+08	14.9012	0.222856	0.254866	13.3729	1.99221	0.616057	0.0917762	0.945086	0.140793	4.68449e+08
171	-112.4	33.56	2644.53	3070	25.0132	26.2639	0.238633	915	0	8	33.5	19.1091	Electricity Generation	7.60508e+10	Blythe Energy	CA	0.067233	100	8.91323	4.05629	1.80114	17.4263	29.6967	1304.35	93.1272	192.511	-368.214	50.5176	68.2404	87.6609	39.5809	51.4335	219.751	252.152	77.8882	2.94526	22.6634	8.56991	2.7291e+09	28.5399	0.30621	0.350193	79.0797	2.99031	25.087	0.94864	194.953	7.37193	1.46555e+09
2725	-99.3	28.69	1404.26	3020.82	26.3065	27.6219	0.133951	200	0	9.31	28.2	21.8575	Electricity Generation	3.02432e+10	W A PARISH	TX	0.0660393	39.1895	8.84324	4.06011	1.82311	17.4301	29.7186	1163.06	81.2514	202.048	-358.706	60.0543	58.487	76.8486	35.581	46.6921	229.287	261.689	31.2921	2.22837	5.90005	4.20154	1.53192e+09	20.4268	0.236977	0.271015	31.9589	2.27585	6.46014	0.460039	43.8318	3.12135	8.22752e+08
168	-115.3	33.06	1529.63	2020	26.0566	27.3595	0.144113	240	0	8.2	0	21.0321	Electricity Generation	3.82926e+10	Springerville Generating Station	AZ	0.0417476	100	8.89205	4.06173	1.82206	17.4317	29.7176	1175.28	82.4426	172.281	-388.441	30.287	59.3307	77.905	35.8845	47.1501	199.52	231.922	39.436	2.57814	12.1705	7.95651	1.64813e+09	23.9277	0.246012	0.281348	40.1566	2.62525	13.6185	0.890311	116.224	7.59818	8.85252e+08
2995	-98	26.56	928.591	2082	28.3908	29.8103	0.096109	83	0	7.24	26.8	16.0318	Electricity Generation	1.93614e+10	J T DEELY	TX	0.0432524	100	8.91423	4.0622	1.83888	17.4322	29.7344	1140.19	79.213	165.421	-395.365	23.4278	56.9144	66.9134	34.9334	42.3362	192.661	225.063	20.1241	2.16716	7.88897	8.49564	1.09914e+09	18.309	0.224657	0.256926	20.6011	2.21854	8.85552	0.953652	77.2861	8.32294	5.904e+08
1292	-81.9	28.69	874.847	2510	27.8063	29.1967	0.0888379	240	0.2	7.3	24.5	5.02289	Lime Manufacturing	1.34836e+10	CHEMICAL LIME LTD MARBLE FALLS PLANT	TX	0.0536408	0.821304	8.8566	4.06386	1.8442	17.4339	29.7397	1045.98	74.4774	156.178	-404.609	14.1839	52.8312	65.281	31.7369	41.6196	183.417	215.819	14.1902	1.62202	0.814454	0.930968	1.01598e+09	13.9669	0.215531	0.246489	14.631	1.67241	0.845285	0.0966208	1.36479	0.156003	5.45732e+08
2942	-99.3	27.31	1044.52	2382	27.9104	29.3059	0.105958	400	0	8.57	28.1	25.1578	Stationary Combustion	2.62335e+10	J K SPRUCE	TX	0.050534	10.3795	8.98178	4.08229	1.85466	17.4523	29.7502	1189.6	83.3614	178.015	-382.756	36.0214	60.3152	78.8781	36.1459	47.586	205.254	237.656	27.0665	2.5913	2.17093	2.07841	1.21178e+09	22.3362	0.249644	0.285502	27.5932	2.64173	2.30572	0.220745	10.1358	0.970381	6.50854e+08
881	-97.1	30.56	2669.81	2841.71	24.5131	25.7388	0.236701	2000	0	7.6	51	14.1146	Stationary Combustion	4.8944e+10	PUTNAM	FL	0.061692	2.27079	8.97862	4.08618	1.83125	17.4562	29.7268	1349.55	96.7132	199.609	-361.116	57.6157	71.3648	81.4949	40.1017	48.7266	226.849	259.251	50.8154	1.90334	3.52743	1.32123	2.707e+09	18.7719	0.318584	0.364345	51.9979	1.94763	3.65323	0.136835	7.47991	0.280167	1.45392e+09
1943	-98.6	28.69	1336.27	2374	26.3091	27.6246	0.127675	400	0	8.2	27.3	35.6446	Electricity Generation	2.692e+10	BAYSIDE POWER STATION	FL	0.0503398	11.0304	8.9395	4.09009	1.85489	17.4601	29.7504	1179.96	82.6116	170.92	-389.836	28.9264	59.6392	78.1674	35.8938	47.2714	198.159	230.561	27.9314	2.09025	2.4345	1.82186	1.46014e+09	19.1293	0.243458	0.278427	28.5672	2.13783	2.60507	0.19495	12.6319	0.94531	7.84276e+08
1577	-80.9	28.19	687.901	6217.17	30.9609	32.5089	0.0773848	240	0	0	0	19.1479	Electricity Generation	1.28716e+10	COTTONWOOD ENERGY PROJECT	TX	0.143621	0.605994	8.96154	4.09012	1.87735	17.4601	29.7729	1152.39	80.0896	168.228	-392.573	26.2341	57.7532	75.7868	35.1813	46.2341	195.467	227.869	13.4601	1.95669	1.96739	2.85999	8.85001e+08	15.2091	0.226454	0.258981	13.8423	2.01225	2.02688	0.294648	2.36064	0.343166	4.75181e+08
1789	-99.4	28.81	1344.13	2275	25.9278	27.2242	0.12651	72	0	7.3	23	33.9334	Electricity Generation	2.87178e+10	W A PARISH	TX	0.0479369	39.1895	8.93176	4.09314	1.85829	17.4631	29.7538	1147.79	79.9995	166.681	-394.071	24.6874	57.4208	70.4136	35.1866	43.8666	193.92	226.322	29.7193	2.21104	5.04523	3.75351	1.44681e+09	20.5412	0.230553	0.263669	30.3497	2.25793	5.56322	0.413888	40.8621	3.04003	7.77118e+08
2900	-81.6	26.44	684.541	2960	30.4377	31.9596	0.0764673	670	0	0	0	25.6743	Stationary Combustion	1.02008e+10	POLK	FL	0.0645631	0.604313	8.94886	4.09851	1.88634	17.4685	29.7819	1166.08	81.0458	181.049	-379.779	39.0549	58.6912	78.0116	35.5667	47.2156	208.288	240.69	10.8056	1.57853	0.731392	1.06844	8.74507e+08	12.3563	0.230448	0.263549	11.1833	1.63369	0.760321	0.11107	1.08933	0.159134	4.69729e+08
2863	-99.3	27.56	1062.98	2120	27.4701	28.8437	0.106148	302	1.1	8.1	30.5	22.8098	Stationary Combustion	2.62867e+10	J K SPRUCE	TX	0.0441748	10.3795	9.00854	4.12644	1.89873	17.4964	29.7943	1177	82.345	189.115	-371.653	47.1217	59.4479	77.6347	35.8141	47.0396	216.355	248.757	27.1251	2.55179	2.00283	1.88416	1.21394e+09	22.3446	0.24429	0.279379	27.653	2.60146	2.13455	0.200808	9.97886	0.938761	6.52038e+08
3117	-99.4	27.06	1200.53	8641.98	28.1907	29.6002	0.121672	360	0	7.33	26.1	36.5863	Stationary Combustion	2.98108e+10	J K SPRUCE	TX	0.202475	6.35043	8.91268	4.12747	1.89418	17.4975	29.7897	1214.29	85.2084	181.004	-379.769	39.0104	62.0073	79.8551	36.7514	48.0153	208.243	240.645	31.0446	2.5859	6.85002	5.70582	1.39149e+09	22.3104	0.258209	0.295297	31.7231	2.64242	7.06286	0.58831	12.5592	1.04614	7.46738e+08
1793	-99.4	28.81	1937.02	2275	25.9278	27.2242	0.182312	2000	0	7.8	0	25.3641	Electricity Generation	4.1385e+10	W A PARISH	TX	0.0479369	39.1895	8.94988	4.12892	1.88144	17.4989	29.777	1369.14	98.2264	168.336	-392.416	26.3425	72.7061	92.6663	40.6275	53.6357	195.575	227.977	42.8283	2.21104	7.27064	3.75351	2.08499e+09	20.5412	0.327988	0.375099	43.7367	2.25793	8.01711	0.413888	58.886	3.04003	1.1199e+09
96	-114.6	33.56	1862.01	4710	25.8319	27.1235	0.172962	472	0	7.9	40	5.49774	Electricity Generation	5.35865e+10	JEFFERIES	SC	0.107039	100	8.94659	4.13564	1.88983	17.5056	29.7854	1233.3	87.2008	181.363	-379.368	39.369	63.3511	82.0161	37.2033	48.9563	208.602	241.004	55.0665	2.95737	18.5251	9.94902	1.97805e+09	27.8387	0.273552	0.312844	55.9124	3.0028	20.3106	1.09079	143.398	7.70123	1.06196e+09
704	-96.9	30.94	1752.89	2331.95	24.3798	25.5988	0.154551	20	1.7	6.2	21	27.4224	Electricity Generation	3.13822e+10	Odessa-Ector Generating Station	TX	0.0493192	2.27079	8.99157	4.15019	1.90808	17.5202	29.8036	1141.32	79.6419	166.965	-393.754	24.9711	56.981	75.2808	35.1699	45.9973	194.204	226.606	32.6142	1.8606	1.8648	1.06384	1.7675e+09	18.4522	0.227178	0.259809	33.3872	1.9047	1.93745	0.110529	4.43619	0.253078	9.49379e+08
1293	-82	28.81	851.272	2510	27.7951	29.1849	0.0863843	240	0.2	7.3	24.5	4.15369	Lime Manufacturing	1.31513e+10	CHEMICAL LIME LTD MARBLE FALLS PLANT	TX	0.0536408	1.42397	8.89802	4.15779	1.93948	17.5278	29.835	1046.09	74.4975	156.208	-404.577	14.2141	52.8394	66.9107	31.8756	42.3346	183.447	215.849	13.8385	1.62563	0.832139	0.977524	9.87922e+08	14.0077	0.21567	0.246648	14.2673	1.676	0.867247	0.101877	1.74308	0.204761	5.30659e+08
1910	-98.6	28.69	1202.61	2374	26.3091	27.6246	0.114904	400	0	8.2	27.3	32.5863	Electricity Generation	2.42273e+10	BAYSIDE POWER STATION	FL	0.0503398	11.0304	9.06784	4.16028	1.92926	17.5303	29.8248	1179.84	82.6056	170.821	-389.935	28.8278	59.634	78.5763	36.031	47.4509	198.061	230.463	25.1376	2.09025	2.19099	1.82186	1.31409e+09	19.1293	0.243425	0.27839	25.7098	2.13783	2.3445	0.19495	11.3684	0.94531	7.05829e+08
1602	-99.6	29.19	2316.46	4406	24.9008	26.1458	0.208418	1400	0	6.88	31.1	70.0225	Electricity Generation	5.25905e+10	W A PARISH	TX	0.0996602	4.52504	8.97984	4.17342	1.92198	17.5434	29.8175	1335.48	95.4519	197.177	-363.569	55.183	70.338	89.8261	39.6968	52.3877	224.416	256.818	54.1764	2.33876	6.08795	2.62813	2.38354e+09	22.7294	0.314338	0.359489	55.2134	2.38353	6.28383	0.271269	12.9963	0.561044	1.27985e+09
1245	-97.8	29.69	1139.92	2060	24.8733	26.117	0.102869	180	0	7.9	0	8.08969	Stationary Combustion	2.11341e+10	LAGRANGE PLANT	TX	0.0427184	1.09669	9.03096	4.18619	1.95983	17.5562	29.8554	965.48	70.922	148.022	-412.718	6.02837	49.5296	66.1759	32.0195	42.0042	175.261	207.663	21.9545	1.92596	1.02025	0.895014	1.17644e+09	18.6617	0.217812	0.249098	22.4678	1.97099	1.05328	0.0923992	1.85653	0.162865	6.31923e+08
853	-95.9	30.69	1749.49	3090	24.4733	25.697	0.154939	395	0	7.4	24	11.4586	Electricity Generation	2.80209e+10	S O PURDOM	FL	0.0677184	1.05062	9.01234	4.18661	1.94442	17.5566	29.84	1172.9	82.1974	171.906	-388.82	29.912	59.1761	78.447	35.7931	47.3886	199.145	231.547	29.2483	1.67182	2.09952	1.20008	1.77194e+09	16.5063	0.23944	0.273832	30.0222	1.71605	2.16794	0.123918	3.32686	0.190162	9.51708e+08
1492	-99	29.31	1588.71	3334	24.8901	26.1346	0.143214	142	0	8	0	32.0774	Electricity Generation	3.13863e+10	W A PARISH	TX	0.0736408	4.10697	8.95968	4.19154	1.9521	17.5615	29.8476	1158.27	80.9039	169.472	-391.271	27.478	58.1456	76.4685	35.3642	46.523	196.711	229.113	32.5055	2.04603	2.82326	1.77708	1.63784e+09	19.8465	0.234794	0.268519	33.2192	2.09095	2.93362	0.184654	7.12077	0.44821	8.79616e+08
642	-96.9	31.19	2700.44	2013	23.9177	25.1136	0.233571	2000	0	7.3	0	20.3238	Electricity Generation	4.82296e+10	Odessa-Ector Generating Station	TX	0.0415777	2.9517	9.05689	4.20403	1.94945	17.574	29.845	1346.34	96.5151	199.172	-361.54	57.1788	71.1377	91.0149	40.0454	52.9036	226.412	258.814	50.0994	1.85523	2.58649	0.957804	2.6712e+09	18.7554	0.317705	0.363339	51.2688	1.89854	2.70297	0.100094	7.6118	0.281873	1.43484e+09
2022	-81.8	27.56	824.912	6280	28.8015	30.2416	0.0866299	240	0	0	0	12.3382	Stationary Combustion	1.28951e+10	BAYTOWN ENERGY CENTER	TX	0.145146	0.769462	8.93609	4.22694	2.00851	17.5969	29.904	1148.51	79.7488	190.306	-370.499	48.3129	57.4923	75.6391	35.0813	46.1702	217.546	249.948	13.5576	1.64352	2.01651	2.44451	9.90731e+08	13.6844	0.22405	0.256232	13.9853	1.69536	2.08512	0.252768	2.55955	0.310282	5.3197e+08
156	-113.1	33.44	2737.45	3570	24.4684	25.6919	0.241529	1216	0	7.8	0	6.36919	Electricity Generation	7.24878e+10	LAKE CATHERINE	AR	0.0793689	100	9.02593	4.24309	1.98763	17.6131	29.8832	1342.47	96.2807	198.517	-362.207	56.5237	70.8843	90.7109	39.9979	52.7724	225.757	258.159	74.3355	2.7155	23.538	8.59853	2.76221e+09	26.9116	0.32187	0.368103	75.541	2.75954	26.0046	0.949957	197.921	7.23014	1.48325e+09
2950	-81.1	26.31	710.681	2641.94	30.5598	32.0877	0.0797198	2000	0	0	0	57.1374	Stationary Combustion	1.05701e+10	POLK	FL	0.0568432	0.722936	8.88865	4.24997	2.03565	17.62	29.9312	1121.91	77.4306	174.285	-386.544	32.2909	55.6113	73.4337	31.2683	45.2061	201.524	233.926	11.2024	1.5763	0.67887	0.955239	9.11704e+08	12.2874	0.211047	0.241361	11.5962	1.6317	0.706924	0.0994715	1.11727	0.157212	4.89723e+08
2501	-81.5	26.94	802.671	2670	29.9245	31.4207	0.0880167	1310	0	7.8	32.2	35.4078	Stationary Combustion	1.30551e+10	POLK	FL	0.0575243	0.628351	8.94428	4.25109	2.03187	17.6211	29.9274	1221.84	85.6342	153.808	-407.01	11.8142	62.5302	81.4851	37.0148	48.7388	181.047	213.449	13.752	1.71329	0.831464	1.03587	1.00659e+09	13.662	0.255855	0.292605	14.1873	1.76751	0.861943	0.107384	1.25572	0.156442	5.40681e+08
2005	-80.4	27.44	669.441	2540	32.0886	33.693	0.078533	860	0	7.3	28.3	7.87481	Electricity Generation	1.25622e+10	SAM BERTRON	TX	0.0543689	0.552446	9.04698	4.25366	2.04011	17.6237	29.9356	1192.21	83.2874	148.907	-411.908	6.91387	60.5125	79.4492	36.3942	47.8446	176.147	208.549	13.1842	1.96943	0.748491	1.11808	8.98132e+08	14.6795	0.243628	0.278622	13.5726	2.02745	0.773881	0.115601	1.08278	0.161745	4.82424e+08
3250	-98.4	26.19	896.342	2567	28.5906	30.0201	0.0933447	380	0	7.41	28.5	1.35588	Electricity Generation	2.09966e+10	MANATEE	FL	0.0550243	100	9.00931	4.25558	2.03359	17.6256	29.9291	1178.38	82.3645	147.526	-413.263	5.53264	59.5647	78.2365	35.86	47.3075	174.766	207.168	21.7296	2.42425	8.01234	8.93893	1.06752e+09	20.3552	0.242866	0.277751	22.1926	2.47591	8.95591	0.999162	75.413	8.41341	5.73373e+08
813	-95.6	30.69	1826.61	3199.92	24.4239	25.645	0.161448	210	0.8	5.4	22	25.8237	Electricity Generation	2.94729e+10	S O PURDOM	FL	0.0703865	0.792624	8.99332	4.26386	2.02028	17.6339	29.9158	1157.29	80.8951	169.42	-391.307	27.4263	58.0845	76.531	32.4789	46.5478	196.659	229.061	30.7495	1.68342	2.2578	1.23606	1.84638e+09	16.6539	0.232563	0.265967	31.5556	1.72755	2.32712	0.127401	3.23817	0.177277	9.91675e+08
1308	-98	29.56	1173.37	3075.93	24.9279	26.1743	0.105999	112	4.5	6.8	24	1.33578	Stationary Combustion	2.15834e+10	NEW BRAUNFELS LIME PLANT	TX	0.0673769	1.09669	9.09632	4.26919	2.04155	17.6392	29.9371	1051.73	75.1899	157.329	-403.413	15.3357	53.2318	66.1023	32.146	41.9721	184.569	216.971	22.4176	1.91053	1.59532	1.3596	1.21224e+09	18.4927	0.222484	0.254441	22.946	1.95556	1.64235	0.139969	2.46995	0.2105	6.51077e+08
2805	-100.4	29.31	2474.61	2592	24.1844	25.3937	0.216931	1390	0	6.7	34	110.703	Electricity Generation	5.78846e+10	W A PARISH	TX	0.0556311	10.188	9.06697	4.27405	2.02148	17.6441	29.917	1340.38	95.8678	171.891	-388.851	29.8969	70.6351	90.3825	39.7703	52.6312	199.13	231.532	59.5838	2.4078	4.92868	1.9917	2.4809e+09	24.017	0.317979	0.363652	60.6655	2.45151	5.20615	0.210382	20.9403	0.846206	1.33245e+09
2760	-100.1	28.94	1307.75	2630.92	25.8045	27.0948	0.122362	85	0	7.27	26	72.8144	Electricity Generation	2.88911e+10	W A PARISH	TX	0.0565757	9.53079	9.03276	4.28122	2.04768	17.6512	29.9432	1153.44	80.4326	167.656	-393.092	25.6625	57.7713	75.9577	35.2021	46.2998	194.896	227.297	29.8536	2.28283	2.54064	1.94276	1.39938e+09	21.3335	0.233371	0.266891	30.4633	2.32945	2.68981	0.205683	10.9925	0.840569	7.51599e+08
1448	-99.3	29.31	1843.57	2829	24.8494	26.0919	0.166047	1009	0	7.6	0	43.2295	Electricity Generation	3.74288e+10	W A PARISH	TX	0.0613835	4.10697	9.01174	4.28783	2.04333	17.6578	29.9389	1258.48	89.1371	185.165	-375.578	43.1716	65.051	84.1827	37.8292	49.9097	212.405	244.807	38.7343	2.10105	2.87565	1.55983	1.89897e+09	20.3975	0.279284	0.3194	39.5621	2.14595	2.99352	0.162376	7.8485	0.425722	1.01991e+09
512	-111.6	32.19	2090.92	6560	24.14	25.347	0.181303	240	0	0	0	56.8203	Electricity Generation	5.21217e+10	UNION POWER STATION	AR	0.151942	100	9.04946	4.29207	2.04479	17.6621	29.9403	1206.82	84.8487	177.079	-383.657	35.085	61.4718	79.6358	36.4091	47.9124	204.318	236.72	54.1258	2.58861	21.464	10.2653	2.07345e+09	26.1043	0.259663	0.29696	54.9612	2.62856	23.3636	1.11738	152.353	7.28639	1.11288e+09
907	-81.3	29.44	715.169	4310	29.8524	31.3451	0.0776923	180	0	7.5	0	20.3201	Electricity Generation	1.11124e+10	WASHINGTON COUNTY COGEN (OLIN)	AL	0.0973301	0.519657	9.09061	4.29745	2.08447	17.6675	29.98	1139.02	79.0867	166.231	-394.552	24.2376	56.8292	75.0552	34.8662	45.9099	193.471	225.872	11.7217	1.63902	1.17036	1.63648	8.88517e+08	13.1925	0.220107	0.251722	12.1069	1.69287	1.21182	0.169445	1.49923	0.209633	4.77188e+08
1145	-94.3	29.94	1122.17	3310.14	25.5193	26.7952	0.10394	160	0	7.3	0	2.88997	Stationary Combustion	1.61654e+10	EVONIK CORPORATION	LA	0.0730617	0.367983	9.08999	4.3034	2.07659	17.6734	29.9721	971.766	70.4603	147.574	-413.173	5.58065	49.2162	64.4303	31.9487	41.239	174.814	207.216	16.9891	1.51395	1.26918	1.13101	1.18869e+09	14.2922	0.206178	0.235792	17.5069	1.56009	1.31078	0.116807	1.58308	0.141073	6.38451e+08
85	-115.4	33.56	2091.41	5459.41	23.9784	25.1774	0.180272	240	0	0	0	22.6624	Electricity Generation	5.57495e+10	Springerville Generating Station	AZ	0.125228	100	9.06517	4.32269	2.07558	17.6927	29.9711	1203.19	84.6533	176.608	-384.122	34.6147	61.2552	80.0306	33.5625	48.0846	203.848	236.25	57.3469	2.74203	20.3462	9.72847	2.06165e+09	27.816	0.260024	0.297373	58.4301	2.79382	22.2464	1.06371	150.519	7.19703	1.1067e+09
2923	-81.1	26.31	636.581	2641.94	30.5598	32.0877	0.0714077	400	0	0	0	57.5436	Stationary Combustion	9.46803e+09	POLK	FL	0.0568432	0.722936	9.0268	4.32789	2.11937	17.6979	30.0149	1121.93	77.4321	151.173	-409.655	9.17983	55.6126	73.4085	34.4524	45.195	178.413	210.815	10.0344	1.5763	0.608086	0.955239	8.16644e+08	12.2874	0.211055	0.24137	10.3871	1.6317	0.633216	0.0994715	1.00078	0.157212	4.38661e+08
2558	-99	27.69	1369.44	2724	27.1355	28.4923	0.134985	1366	0	8.33	38.3	31.3758	Stationary Combustion	3.2681e+10	J K SPRUCE	TX	0.058835	10.3795	9.00358	4.3343	2.09701	17.7043	29.9925	1309.72	93.2621	170.184	-390.584	28.1909	68.5989	88.0274	39.0762	51.6021	197.424	229.826	33.7376	2.46361	3.00812	2.1966	1.54374e+09	21.8545	0.302213	0.345622	34.4086	2.5126	3.18536	0.232603	13.16	0.960977	8.29118e+08
3010	-97.5	26.44	707.061	3314	30.2325	31.7442	0.0778289	2000	0	6.1	0	56.1035	Electricity Generation	1.32536e+10	J T DEELY	TX	0.0731553	6.29155	9.09144	4.33597	2.12289	17.706	30.0184	1129.8	78.2564	178.774	-382.02	36.7801	56.1569	74.287	34.5727	45.5746	206.013	238.415	13.8654	1.96099	1.37191	1.9403	8.90079e+08	15.5777	0.217197	0.248395	14.251	2.01553	1.44828	0.204831	4.93437	0.697871	4.78055e+08
693	-97	31.19	3936.63	18183	23.999	25.1989	0.333249	350	0	0	0	27.4585	Electricity Generation	7.16699e+10	Odessa-Ector Generating Station	TX	0.434053	2.9517	9.06108	4.33627	2.07322	17.7063	29.9688	1276.14	90.4997	188.153	-372.559	46.1592	66.2855	74.6716	37.922	45.7287	215.392	247.794	76.4358	1.94166	33.8955	8.6103	3.81115e+09	20.0558	0.283618	0.324356	78.3677	1.99073	34.8293	0.884749	41.8189	1.0623	2.04305e+09
1160	-81	28.94	686.021	9390	30.6985	32.2335	0.076234	240	0	0	0	16.7165	Electricity Generation	1.12448e+10	HOG BAYOU ENERGY CENTER	AL	0.220631	0.488068	9.08742	4.34277	2.13079	17.7128	30.0263	1152.72	80.1337	168.338	-392.453	26.3444	57.7785	75.6996	35.1267	46.1942	195.577	227.979	11.8099	1.72151	2.63281	3.83779	8.7184e+08	13.546	0.225192	0.257538	12.1858	1.7763	2.71938	0.396399	2.98411	0.434989	4.67978e+08
476	-111.3	32.31	1729.22	2630	23.9502	25.1477	0.150048	412	0	0	0	16.5669	Cement Production	4.60431e+10	CEMEX SOUTHEAST LLC	GA	0.0565534	100	9.075	4.34331	2.10223	17.7133	29.9978	1118.88	80.7646	167.846	-392.894	25.8519	57.8506	75.7528	36.8078	46.2084	195.085	227.487	47.2092	2.73009	13.6274	7.88065	1.716e+09	27.5112	0.258948	0.296142	47.9575	2.77336	15.1443	0.875789	121.961	7.05296	9.21586e+08
1309	-97.9	29.56	1463.26	3075.93	24.957	26.2048	0.132347	112	4.5	6.8	24	3.52542	Stationary Combustion	2.67357e+10	PASCO COGENERATION	FL	0.0673769	1.09669	9.1148	4.34356	2.10701	17.7136	30.0025	1149.82	80.2432	168.201	-392.541	26.2077	57.5915	75.8801	35.176	46.2647	195.441	227.843	27.7776	1.89833	1.97756	1.35147	1.51357e+09	18.3524	0.230246	0.263318	28.4373	1.94342	2.03628	0.139161	3.0696	0.209778	8.12916e+08
2743	-99.9	28.81	1784.63	2834.82	26.0908	27.3953	0.168808	2000	0	7.6	0	65.2992	Electricity Generation	3.91542e+10	W A PARISH	TX	0.0615248	9.53079	9.05061	4.35146	2.10642	17.7215	30.002	1379.28	99.0222	168.922	-391.829	26.9279	73.3654	93.5976	40.8102	54.0443	196.161	228.563	40.4787	2.26818	3.66536	2.05384	1.93055e+09	20.9675	0.332416	0.380163	41.3195	2.31529	3.87527	0.217147	15.3292	0.858955	1.03686e+09
778	-97.8	30.81	1722.81	2304.39	23.8417	25.0339	0.148498	446	1.2	7.6	25.2	32.7796	Cement Production	3.51337e+10	HOLCIM (US) INC	AL	0.0486504	1.54887	9.08558	4.35201	2.11128	17.722	30.0068	1099.42	79.213	164.889	-395.828	22.8952	56.4912	77.8248	36.2877	47.1138	192.128	224.53	36.3119	2.10772	1.93455	1.12291	1.69828e+09	21.3816	0.246202	0.281566	37.0548	2.15083	1.99332	0.115702	3.63088	0.210753	9.12174e+08
2561	-99.1	27.81	1187.76	2914.04	27.6492	29.0317	0.119255	1366	0	8.33	38.3	27.7934	Stationary Combustion	2.68458e+10	J K SPRUCE	TX	0.0634476	10.3795	9.05345	4.35801	2.12548	17.728	30.021	1295.26	92.0528	170.254	-390.513	28.2605	67.6049	86.8392	38.7268	51.0803	197.494	229.895	27.7798	2.33884	2.6665	2.24498	1.36384e+09	20.3687	0.294625	0.336944	28.3726	2.38875	2.82581	0.237911	11.638	0.979834	7.32494e+08
203	-111.9	33.19	1643.37	4310	25.7837	27.073	0.152557	400	0	7	26	5.75226	Stationary Combustion	4.23476e+10	CARDINAL GLASS PLT	OK	0.0973301	100	9.08953	4.3604	2.11875	17.7304	30.0143	1208.21	85.1548	177.465	-383.259	35.4709	61.6192	80.208	36.4685	48.1614	204.704	237.106	43.5048	2.64729	15.3751	9.35583	1.7447e+09	24.9354	0.260751	0.298205	44.2658	2.6936	16.9457	1.03115	125.525	7.63826	9.36792e+08
1528	-99.3	29.31	1515.65	2829	24.8494	26.0919	0.136511	150	0	7.39	23.1	37.1905	Electricity Generation	3.07712e+10	W A PARISH	TX	0.0613835	4.10697	9.0301	4.36238	2.12467	17.7324	30.0202	1159.57	81.0065	169.661	-391.082	27.6675	58.2303	76.6431	35.2974	46.5998	196.901	229.302	31.8444	2.10105	2.36415	1.55983	1.56119e+09	20.3975	0.235821	0.269693	32.525	2.14595	2.46105	0.162376	6.45245	0.425722	8.38495e+08
2553	-81.5	26.81	725.211	2070.18	29.9354	31.4322	0.0796372	605	0	0	0	27.2262	Stationary Combustion	1.16155e+10	POLK	FL	0.0429655	0.628351	8.95143	4.3631	2.14883	17.7331	30.0444	1166.49	81.1353	175.585	-385.235	33.5913	58.7183	77.229	35.74	46.8708	202.824	235.226	12.2495	1.6891	0.56285	0.776119	9.1076e+08	13.4498	0.231746	0.265033	12.6434	1.74341	0.584699	0.0806247	0.941006	0.129756	4.89235e+08
1819	-98.4	28.81	1239.92	3080	26.1758	27.4846	0.117723	900	0	0	0	21.6352	Electricity Generation	2.49743e+10	BAYSIDE POWER STATION	FL	0.0674757	11.0304	9.16991	4.37335	2.14134	17.7433	30.0369	1236.05	87.2388	177.772	-382.983	35.778	63.5244	82.4752	37.3136	49.1623	205.011	237.413	25.8978	2.08867	2.69576	2.17413	1.34633e+09	19.2359	0.268148	0.306664	26.4838	2.13592	2.86296	0.230898	12.1075	0.97647	7.23083e+08
2751	-99.5	28.81	1134.68	2275	25.9027	27.1979	0.106657	60	0	6.8	24	37.6833	Electricity Generation	2.44903e+10	W A PARISH	TX	0.0479369	9.53079	9.16543	4.3804	2.15249	17.7504	30.048	1147.07	79.9449	189.616	-371.134	47.6223	57.3673	70.3294	35.0044	43.8293	216.855	249.257	25.3345	2.23275	1.9568	1.72454	1.21977e+09	20.77	0.230406	0.263501	25.8661	2.27959	2.08228	0.183513	9.3197	0.821351	6.55164e+08
2864	-81.4	26.56	638.931	2883.04	30.3341	31.8507	0.0711061	2000	0	5.8	0	36.2237	Stationary Combustion	9.60675e+09	POLK	FL	0.0626952	0.722936	9.08432	4.38167	2.17338	17.7517	30.0689	1121.9	77.4702	171.898	-388.927	29.9048	55.6315	73.7065	34.4503	45.3253	199.138	231.54	10.1695	1.59165	0.67512	1.05664	8.13195e+08	12.5056	0.211417	0.241784	10.5208	1.64662	0.702201	0.109903	1.0682	0.167186	4.36798e+08
289	-112.9	32.94	1402.06	2152.84	25.5449	26.8222	0.129654	296	0	0	0	13.9131	Electricity Generation	3.77712e+10	Hugo	OK	0.0449719	100	9.1178	4.39111	2.15533	17.7611	30.0509	1190.62	83.6743	174.636	-386.097	32.642	60.3966	79.0409	36.1774	47.6507	201.875	234.277	38.7923	2.76681	11.2128	7.99736	1.48277e+09	26.1621	0.254246	0.290765	39.4397	2.81298	12.5171	0.892762	104.824	7.47642	7.96398e+08
1559	-99.6	29.19	1477.69	4406	24.9008	26.1458	0.132952	177	2.4	7.5	25.7	64.7928	Electricity Generation	3.3548e+10	W A PARISH	TX	0.0996602	4.52504	9.12932	4.39191	2.1552	17.7619	30.0507	1174.05	82.1456	171.866	-388.879	29.8726	59.2023	77.5402	35.7176	46.9941	199.106	231.507	34.5597	2.33876	3.88356	2.62813	1.52049e+09	22.7294	0.243208	0.278141	35.2212	2.38353	4.00852	0.271269	8.2905	0.561044	8.16428e+08
957	-81.3	29.31	720.711	4310	29.6906	31.1752	0.0778898	180	0	7.5	0	27.9772	Electricity Generation	1.11292e+10	WASHINGTON COUNTY COGEN (OLIN)	AL	0.0973301	0.519657	9.12256	4.39361	2.18049	17.7636	30.076	1139.42	79.1057	166.274	-394.51	24.2807	56.8492	74.9085	34.8037	45.8456	193.514	225.916	11.74	1.62895	1.17222	1.62647	8.90776e+08	13.1795	0.220229	0.251861	12.1261	1.68252	1.21377	0.168414	1.50192	0.208394	4.78401e+08
1570	-99.3	29.19	1458.13	2478	25.2024	26.4625	0.133313	300	0	7.8	0	32.3692	Electricity Generation	3.00253e+10	W A PARISH	TX	0.0528641	4.10697	9.0359	4.40009	2.16326	17.7701	30.0588	1175.1	82.2723	172.082	-388.665	30.0887	59.3068	77.7888	36.0093	47.1035	199.322	231.724	31.0784	2.13138	2.04276	1.40094	1.52462e+09	20.3843	0.242607	0.277454	31.7429	2.17695	2.13175	0.146197	6.02983	0.41353	8.1889e+08
1091	-90.8	29.94	1136.03	3180	25.6958	26.9805	0.106131	431	0	7.2	0	11.0854	Hydrogen Production	1.3782e+10	LINDE GAS NORTH AMERICA LLC, SARALAND PLANT	AL	0.0699029	0.302084	9.17279	4.40582	2.17812	17.7758	30.0737	995.878	72.3823	151.336	-409.412	9.34269	50.8721	67.7156	32.0055	42.6815	178.576	210.978	14.6284	1.28768	1.04598	0.920734	1.21375e+09	12.0522	0.215009	0.245892	15.1572	1.33422	1.0861	0.0956048	1.31436	0.115698	6.51939e+08
575	-92.9	31.81	1412.63	9661.51	23.9556	25.1534	0.121403	76	0	7.2	20	9.69243	Stationary Combustion	2.034e+10	GULF SOUTH PIPELINE - CARTHAGE JCT STATION	TX	0.227221	0.372206	9.08936	4.40671	2.1735	17.7767	30.069	965.464	70.8978	148.139	-412.577	6.14507	49.5268	65.906	31.9623	41.8813	175.378	207.78	22.0577	1.56147	5.04498	3.57135	1.3884e+09	15.8871	0.215392	0.24633	22.5919	1.59928	5.17076	0.366038	5.49223	0.388795	7.45169e+08
860	-95.9	30.56	1462.66	2683.27	24.5002	25.7253	0.129772	136	0	6.5	30	2.45914	Electricity Generation	2.38479e+10	S O PURDOM	FL	0.0578464	1.05062	9.13048	4.40877	2.17295	17.7788	30.0685	1148.61	80.2159	168.1	-392.627	26.1067	57.5089	75.9138	35.1635	46.2769	195.34	227.742	24.8799	1.701	1.53878	1.05204	1.48411e+09	16.7642	0.229083	0.261988	25.5282	1.74532	1.58969	0.108685	2.5604	0.175051	7.97149e+08
1238	-97.8	29.69	1026.23	2060	24.8733	26.117	0.092609	18	0	0	0	1.51513	Stationary Combustion	1.90263e+10	LAGRANGE PLANT	TX	0.0427184	1.09669	9.09714	4.40881	2.18719	17.7788	30.0827	948.486	69.5353	145.369	-415.372	3.37523	48.3634	64.8117	31.5687	41.4053	172.608	205.01	19.7648	1.92596	0.918491	0.895014	1.05911e+09	18.6617	0.210399	0.24062	20.227	1.97099	0.948229	0.0923992	1.67137	0.162865	5.68898e+08
1526	-99.4	29.19	1364.98	2207.95	25.1517	26.4093	0.124563	220	0.7	7.3	27.7	46.0251	Electricity Generation	2.87871e+10	W A PARISH	TX	0.0463095	4.10697	9.11567	4.4132	2.17896	17.7832	30.0745	1167.36	81.6304	170.852	-389.894	28.8584	58.7596	69.8118	35.6053	43.6013	198.091	230.493	29.7743	2.1813	1.75242	1.28384	1.42454e+09	20.9009	0.23958	0.273992	30.3954	2.2268	1.83152	0.134179	5.47383	0.401019	7.65159e+08
3015	-98.8	26.44	875.961	4930	28.6166	30.0474	0.0909123	206	0	8.3	0	34.1482	Electricity Generation	2.02269e+10	MANATEE	FL	0.112379	100	9.06325	4.41492	2.19419	17.7849	30.0897	1164.98	81.2224	164.644	-396.14	22.6503	58.6071	76.7315	35.4933	46.646	191.883	224.285	20.9163	2.38781	8.9896	10.2626	1.03971e+09	20.1175	0.236161	0.270083	21.3665	2.43921	9.9321	1.13385	74.638	8.5207	5.58264e+08
2351	-80.5	26.94	917.492	26952.1	30.3154	31.8312	0.0992368	83	0	7.1	25	12.6297	Stationary Combustion	1.42265e+10	GUADALUPE GENERATING STATION	TX	0.646895	0.719073	9.08419	4.41972	2.19507	17.7897	30.0906	1234.55	86.3483	156.868	-403.953	14.8741	63.4302	72.6174	36.7777	44.8464	184.107	216.509	15.7927	1.72129	10.2683	11.1918	1.13491e+09	13.9154	0.256704	0.293576	16.4019	1.78769	10.6693	1.16288	11.1761	1.21811	6.08053e+08
2943	-81.5	26.31	628.721	2752.16	30.4684	31.9918	0.0703252	520	0	0	0	44.5936	Stationary Combustion	9.35891e+09	POLK	FL	0.0595184	0.607739	9.0972	4.43785	2.23017	17.8079	30.1257	1156.27	80.225	163.212	-397.616	21.2186	57.995	76.2074	35.2953	46.4237	190.452	222.853	9.91611	1.57719	0.621402	0.98836	8.04264e+08	12.3294	0.226064	0.258534	10.2634	1.63243	0.646281	0.102793	0.950588	0.151194	4.32007e+08
1511	-100	29.19	1398.09	3292	25.0659	26.3192	0.126916	207	0	0	0	82.5192	Electricity Generation	3.07449e+10	W A PARISH	TX	0.0726214	4.52504	9.13552	4.44279	2.20783	17.8128	30.1034	1172.8	82.0276	171.637	-389.108	29.6434	59.0978	77.639	35.6564	47.0374	198.876	231.278	31.7318	2.26966	2.7238	1.94823	1.45145e+09	21.8621	0.242218	0.277009	32.3641	2.31488	2.82615	0.202144	6.91442	0.494562	7.79494e+08
348	-113.5	32.44	1215.2	2310	25.8713	27.1649	0.113978	150	4.9	7.6	29	79.3166	Electricity Generation	3.22597e+10	Hugo	OK	0.0487864	100	9.22198	4.44541	2.21472	17.8154	30.1103	1169.89	81.8069	171.184	-389.562	29.1899	58.9003	77.418	35.6884	46.9405	198.423	230.825	33.1544	2.7283	9.94097	8.18051	1.30349e+09	25.435	0.243734	0.278743	33.7226	2.77506	11.0895	0.912567	92.2349	7.59009	7.00099e+08
2761	-100.1	28.94	1800.75	2630.92	25.8045	27.0948	0.168491	2000	0	0	0	77.7746	Electricity Generation	3.97825e+10	W A PARISH	TX	0.0565757	9.53079	9.10705	4.45186	2.20688	17.8219	30.1024	1383.97	99.4143	167.68	-393.068	25.6867	73.6763	93.7196	41.0012	54.0974	194.92	227.322	41.1079	2.28283	3.49841	1.94276	1.92692e+09	21.3335	0.334841	0.382936	41.9475	2.32945	3.70383	0.205683	15.1365	0.840569	1.03494e+09
692	-96.8	31.06	1658.5	2078	23.9853	25.1846	0.14388	40	0	7.1	22	22.2323	Electricity Generation	2.9043e+10	Odessa-Ector Generating Station	TX	0.0431553	2.27079	9.12422	4.45323	2.21361	17.8232	30.1092	1143.14	79.8196	167.282	-393.432	25.2887	57.1114	76.0928	35.0196	46.3531	194.522	226.924	30.1943	1.82058	1.54164	0.929538	1.64547e+09	18.35	0.228146	0.260916	30.9145	1.864	1.60488	0.0967665	3.93117	0.237031	8.8386e+08
2311	-97.3	28.19	786.001	3590	27.195	28.5547	0.0776583	850	0	0	25	17.6914	Petroleum and Natural Gas Systems	1.41743e+10	COPANO PROCESSING HOUSTON CENTRAL GAS PLT	TX	0.0798544	1.44908	9.19099	4.46287	2.2499	17.8329	30.1454	1022.72	75.4264	188.934	-371.839	46.9402	53.4702	75.2916	33.8995	46.0118	216.173	248.575	14.7823	1.8807	1.26261	1.60637	8.88128e+08	16.6443	0.240083	0.274567	15.1679	1.92976	1.30447	0.165962	2.1056	0.267887	4.76985e+08
367	-113.3	32.44	1510.68	2310	25.3363	26.6031	0.138688	240	0	0	0	66.603	Electricity Generation	4.25525e+10	Hugo	OK	0.0487864	100	9.10432	4.46289	2.22461	17.8329	30.1201	1188.99	83.4317	174.229	-386.513	32.2351	60.2314	78.809	36.1208	47.5504	201.468	233.87	43.6375	2.88859	12.2569	8.11346	1.58608e+09	27.5128	0.253956	0.290433	44.3292	2.93438	13.6542	0.903842	112.389	7.43962	8.51856e+08
1618	-80.9	28.06	594.533	6217.17	31.4278	32.9992	0.0679439	240	0	0	0	13.0591	Electricity Generation	1.08512e+10	COTTONWOOD ENERGY PROJECT	TX	0.143621	0.605994	9.10001	4.46369	2.25794	17.8337	30.1535	1129.36	78.1956	164.602	-396.203	22.6082	56.1701	72.3552	34.535	44.7284	191.841	224.243	11.3691	1.91228	1.66291	2.79699	7.77031e+08	14.6315	0.215933	0.246949	11.7045	1.9687	1.71512	0.288482	2.00816	0.337772	4.17216e+08
1679	-80.9	28.06	600.441	6217.17	31.4278	32.9992	0.0686191	240	0	0	0	18.4147	Electricity Generation	1.0959e+10	COTTONWOOD ENERGY PROJECT	TX	0.143621	0.605994	9.08322	4.46514	2.25883	17.8351	30.1544	1129.58	78.2069	164.626	-396.179	22.6326	56.1799	73.8529	34.491	45.3859	191.866	224.267	11.4821	1.91228	1.67943	2.79699	7.84752e+08	14.6315	0.215993	0.247018	11.8209	1.9687	1.73216	0.288482	2.02812	0.337772	4.21362e+08
1510	-100.1	29.19	1483.14	3292	25.0546	26.3073	0.134543	207	0	0	0	94.6855	Electricity Generation	3.34072e+10	W A PARISH	TX	0.0726214	4.52504	9.08506	4.46942	2.23225	17.8394	30.1278	1174.79	82.1825	171.932	-388.813	29.938	59.2231	77.7179	35.7761	47.0719	199.171	231.573	34.4521	2.32291	2.94656	1.9867	1.53868e+09	22.3908	0.243411	0.278374	35.1224	2.3681	3.05505	0.205985	7.38897	0.498196	8.26331e+08
1709	-98.9	29.06	1169.95	2660	25.4175	26.6884	0.107888	164	4.2	6.6	27.1	15.0137	Electricity Generation	2.29695e+10	W A PARISH	TX	0.0572816	39.1895	9.21538	4.47294	2.24454	17.8429	30.1401	1156.3	80.7335	169.157	-391.591	27.1636	58.0271	76.1288	35.3427	46.375	196.397	228.798	23.8212	2.03609	4.45215	3.80542	1.23385e+09	19.3065	0.233581	0.267131	24.3588	2.08204	4.8988	0.418719	35.0007	2.99164	6.62705e+08
2529	-99.6	27.81	1148.94	4443	27.1006	28.4556	0.112689	1300	0	8.5	28	24.5984	Stationary Combustion	2.65314e+10	J K SPRUCE	TX	0.100558	10.3795	9.24283	4.48296	2.25275	17.853	30.1483	1303.33	92.7502	185.955	-374.806	43.9619	68.1644	87.4097	38.8773	51.3298	213.195	245.597	27.3914	2.38405	3.6086	3.1408	1.28875e+09	21.2542	0.29871	0.341615	27.9511	2.43277	3.77967	0.32897	12.1049	1.05357	6.92015e+08
999	-93	30.19	1501.76	17749	25.4416	26.7137	0.136567	2000	0	7.7	0	9.96649	Stationary Combustion	1.91302e+10	CABOT CORP - VILLE PLATTE PLANT	LA	0.423519	0.373328	9.05472	4.4835	2.24583	17.8535	30.1414	1174.29	86.6262	179.359	-381.381	37.3659	63.1863	89.5083	39.5453	52.2473	206.599	239.001	20.616	1.37279	8.76851	5.83882	1.56183e+09	13.1999	0.290938	0.332727	21.4399	1.42765	9.12241	0.607447	9.48486	0.631583	8.37643e+08
1429	-95.8	29.44	1167.2	5937	25.8813	27.1754	0.109285	2000	0	7.3	0	15.8756	Stationary Combustion	1.80232e+10	GIDDINGS GAS PLANT	TX	0.13682	0.544521	9.22491	4.48446	2.25553	17.8545	30.1511	1119.06	83.335	172.039	-388.713	30.0457	60.1209	87.9781	38.6357	51.5775	199.279	231.681	18.8622	1.61602	2.62419	2.24828	1.24982e+09	15.0919	0.281285	0.321687	19.4051	1.66254	2.70431	0.231692	3.12786	0.267979	6.71088e+08
1811	-99.1	28.81	1385.7	2020	25.9466	27.2439	0.130607	1525	0	8.1	27	8.45575	Electricity Generation	2.83756e+10	W A PARISH	TX	0.0417476	39.1895	9.17843	4.48954	2.25348	17.8595	30.149	1303.8	92.8482	196.981	-363.773	54.987	68.2132	87.8859	35.7978	51.5373	224.22	256.622	29.4146	2.12272	4.96582	3.58361	1.49367e+09	19.6929	0.298677	0.341577	30.0654	2.16969	5.49672	0.396674	41.9401	3.02664	8.02316e+08
2800	-100.1	29.19	1474.69	3292	25.0546	26.3073	0.133776	207	0	0	0	86.4146	Electricity Generation	3.32169e+10	W A PARISH	TX	0.0726214	4.52504	9.09173	4.49354	2.25658	17.8635	30.1521	1174.45	82.165	168.579	-392.165	26.5859	59.2079	77.6279	35.1472	47.0324	195.819	228.221	34.2558	2.32291	2.92977	1.9867	1.52991e+09	22.3908	0.243317	0.278267	34.9223	2.3681	3.03764	0.205985	7.34686	0.498196	8.21622e+08
1381	-98.3	29.44	1580.18	4577.66	25.0402	26.2922	0.143063	900	0	6.1	0	11.6551	Electricity Generation	3.00045e+10	HAYS ENERGY PROJECT	TX	0.103827	3.05015	9.12937	4.4945	2.2551	17.8645	30.1506	1240.76	87.6841	182.443	-378.3	40.4494	63.8595	82.7332	37.3708	49.2734	209.682	242.084	31.1052	1.96846	3.54821	2.24545	1.63612e+09	19.0116	0.270212	0.309024	31.8173	2.01353	3.66498	0.231935	6.77095	0.428494	8.78563e+08
2570	-99.1	27.69	1344.93	2683.27	27.5243	28.9005	0.134447	2000	1.3	9	29.2	24.7051	Stationary Combustion	3.16705e+10	J K SPRUCE	TX	0.0578464	10.3795	9.09141	4.49621	2.25907	17.8662	30.1546	1379.52	99.0151	172.701	-388.067	30.7071	73.4232	93.4818	40.8689	53.9965	199.94	232.342	32.7251	2.43322	2.91212	2.16526	1.53758e+09	21.2835	0.332525	0.380288	33.3936	2.48292	3.08801	0.229604	13.023	0.968305	8.25823e+08
1802	-81.6	27.94	1047.84	3978.34	28.9926	30.4422	0.110987	240	0	0	0	2.4034	Stationary Combustion	1.70499e+10	FLORIDA NATURAL GROWERS	FL	0.0892802	0.850795	9.23846	4.5039	2.27431	17.8739	30.1698	1415.63	93.4096	202.557	-358.248	60.5633	69.3161	75.5723	35.1089	46.1408	229.796	262.198	17.9178	1.70998	1.66866	1.59248	1.26929e+09	14.1164	0.245236	0.280461	18.4668	1.76237	1.72696	0.164811	2.39919	0.228965	6.81694e+08
1884	-98.6	28.69	1051.41	2374	26.3091	27.6246	0.100458	160	0	7.5	0	21.3017	Electricity Generation	2.11814e+10	BAYSIDE POWER STATION	FL	0.0503398	11.0304	9.18715	4.50525	2.27994	17.8753	30.1755	1153.77	80.4783	173.042	-387.714	31.0486	57.8461	76.1882	35.2561	46.4025	200.282	232.683	21.9772	2.09025	1.91553	1.82186	1.14887e+09	19.1293	0.232053	0.265385	22.4774	2.13783	2.04974	0.19495	9.93912	0.94531	6.17089e+08
1729	-98.9	28.94	1733.59	6718	25.8318	27.1233	0.161477	2000	0	7.25	0	16.2206	Electricity Generation	3.43204e+10	W A PARISH	TX	0.155777	39.1895	9.12551	4.51911	2.27554	17.8891	30.1711	1374.96	98.6257	203.43	-357.323	61.436	73.117	92.7336	40.6284	53.6653	230.669	263.071	35.7358	2.06137	10.1881	5.87688	1.84672e+09	19.351	0.32848	0.375662	36.5181	2.1065	10.9297	0.630466	55.9605	3.22801	9.91371e+08
259	-112.9	32.94	1615.32	2152.84	25.5449	26.8222	0.149375	1050	0	0	34	18.5148	Electricity Generation	4.35164e+10	Hugo	OK	0.0449719	100	9.17177	4.51982	2.27889	17.8898	30.1744	1302.51	92.9256	192.178	-368.555	50.1843	68.1144	87.5841	38.9374	51.4012	219.417	251.819	44.6928	2.76681	12.9183	7.99736	1.7083e+09	26.1621	0.3037	0.347322	45.4387	2.81298	14.421	0.892762	120.768	7.47642	9.17534e+08
851	-94.9	30.69	1168.21	2050	24.5119	25.7375	0.103819	470	0	0	0	4.77045	Stationary Combustion	1.71478e+10	MOBILE BAY NGL RECOVERY PLANT	AL	0.0424757	0.796784	9.21773	4.52016	2.29341	17.8902	30.1889	981.175	72.2394	150.552	-410.176	8.55847	50.6161	67.361	32.398	42.5222	177.791	210.193	17.9815	1.53924	0.824186	0.705514	1.18731e+09	15.1448	0.222425	0.254373	18.5004	1.58365	0.854369	0.0731351	1.44337	0.123554	6.37781e+08
1466	-100.1	29.31	1564.99	3292	24.4803	25.7043	0.138728	240	0	0	0	94.1038	Electricity Generation	3.5283e+10	W A PARISH	TX	0.0726214	4.52504	9.14162	4.52137	2.28308	17.8914	30.1786	1181.41	82.7378	172.977	-387.766	30.9836	59.6806	78.3522	35.9581	47.3502	200.217	232.619	36.3589	2.32327	3.09886	1.98011	1.58654e+09	22.9171	0.246823	0.282276	37.0501	2.36743	3.21073	0.20516	7.67943	0.490701	8.52028e+08
782	-96.8	30.94	1480.02	2078	24.1968	25.4067	0.129586	20	1.7	6.2	21	25.1868	Electricity Generation	2.61441e+10	Odessa-Ector Generating Station	TX	0.0431553	2.27079	9.20784	4.54117	2.3054	17.9112	30.2009	1140.84	79.6059	166.891	-393.827	24.8979	56.9497	75.3344	34.915	46.0209	194.131	226.533	27.1805	1.83649	1.38788	0.937739	1.482e+09	18.3405	0.226982	0.259585	27.8288	1.88029	1.44482	0.097621	3.54	0.239185	7.96051e+08
651	-96.6	31.19	1666.16	3884	23.824	25.0152	0.143121	32	0	6.7	20	4.96433	Electricity Generation	2.95742e+10	Odessa-Ector Generating Station	TX	0.0869903	2.16812	9.16722	4.54135	2.30194	17.9114	30.1975	1146.22	80.102	167.822	-392.889	25.828	57.3417	75.7624	35.106	46.2074	195.061	227.463	30.6918	1.84206	2.89649	1.73842	1.63679e+09	18.7512	0.229644	0.262629	31.4073	1.88501	2.98922	0.179407	5.19813	0.311982	8.79005e+08
2133	-80.6	27.31	634.871	2630	30.0076	31.508	0.0697628	240	0	0	0	22.6467	Stationary Combustion	1.01647e+10	GUADALUPE GENERATING STATION	TX	0.0565534	0.552446	9.15902	4.55517	2.34793	17.9252	30.2435	1140.84	79.0813	166.525	-394.29	24.5316	56.9525	74.9754	34.9291	45.8806	193.765	226.166	10.7178	1.68819	0.634274	0.99906	7.97833e+08	13.4337	0.220572	0.252254	11.0629	1.74254	0.657582	0.103577	0.93199	0.1468	4.28551e+08
91	-115.3	33.44	1575.38	2120	24.7424	25.9796	0.140966	240	0	0	0	24.1933	Electricity Generation	4.50317e+10	Springerville Generating Station	AZ	0.0441748	100	9.16737	4.55823	2.31935	17.9282	30.2149	1190.89	83.7284	174.7	-386.026	32.7062	60.4048	79.0481	36.179	47.6526	201.939	234.341	46.139	2.92875	12.3325	7.82828	1.61214e+09	28.6197	0.256314	0.29313	46.8434	2.97347	13.7499	0.872795	114.109	7.24325	8.65869e+08
1016	-96.9	30.19	1140.01	2242.4	24.779	26.018	0.102329	46	1.8	6.9	24.9	18.2547	Petroleum and Natural Gas Systems	2.11945e+10	TARGA MIDSTREAM SERVICES LLC - LOWRY GAS PROCESSING PLANT	LA	0.0471456	1.93098	9.24646	4.56205	2.33592	17.932	30.2315	952.813	69.9105	146.064	-414.666	4.07062	48.6452	65.1768	31.7028	41.5638	173.304	205.705	22.0094	1.93064	1.18195	1.03679	1.17027e+09	18.8072	0.212518	0.243044	22.5206	1.97547	1.22549	0.107498	2.63235	0.230906	6.28592e+08
2787	-99.8	29.06	1233.96	4233.23	25.3754	26.6441	0.113199	436	3.2	7.2	31.4	64.4091	Electricity Generation	2.72617e+10	W A PARISH	TX	0.0954666	9.53079	9.30189	4.56796	2.33756	17.938	30.2331	1202.56	84.4883	176.091	-384.655	34.0978	61.1704	80.0765	36.6748	48.1077	203.331	235.733	28.1286	2.27954	3.47321	2.81468	1.29458e+09	21.728	0.255032	0.291663	28.692	2.32519	3.63289	0.294408	11.3121	0.91673	6.95159e+08
252	-113.3	32.94	1339.53	4288.33	25.4811	26.7552	0.123025	86	0	0	24.5	45.5283	Electricity Generation	3.62023e+10	Hugo	OK	0.0968042	100	9.20367	4.56872	2.33497	17.9387	30.2305	1167.86	81.7196	170.996	-389.739	29.002	58.794	77.0742	35.5792	46.7876	198.235	230.637	37.1298	2.77185	12.5785	9.39021	1.40696e+09	26.3901	0.243443	0.27841	37.7427	2.8176	13.8444	1.03352	101.403	7.57002	7.55429e+08
948	-96.3	30.44	2617.48	3771.68	24.6927	25.9274	0.233629	2000	0	0	0	15.7254	Pulp and Paper Manufacturing	4.47332e+10	GEORGIA-PACIFIC PORT HUDSON OPERATIONS	LA	0.0842642	2.12018	9.27324	4.58128	2.32669	17.9513	30.2222	1347.61	96.1186	198.724	-362.004	56.7304	70.929	90.2228	39.7482	52.5587	225.963	258.365	46.5637	1.77895	4.28538	1.63722	2.67186e+09	17.4274	0.311932	0.356737	47.7295	1.82349	4.43229	0.169335	7.95848	0.304052	1.43492e+09
1123	-97	30.06	1366.74	3330	24.5802	25.8093	0.121555	79	0	6.4	0	6.25468	Stationary Combustion	2.53663e+10	MICHOUD	LA	0.0735437	1.93098	9.20515	4.58921	2.35593	17.9592	30.2515	1148.92	80.2133	168.11	-392.622	26.1167	57.5267	75.6186	35.0691	46.1482	195.35	227.752	26.3196	1.92572	2.10705	1.54166	1.39015e+09	18.9329	0.230459	0.263561	26.9261	1.97009	2.17472	0.159117	3.8457	0.281378	7.46601e+08
1444	-97.3	29.44	988.994	2511.06	25.1629	26.421	0.0902997	2000	0	6.45	0	9.45114	Petroleum and Natural Gas Systems	1.80781e+10	DISCOVERY PRODUCER SERVICES LLC - LAROSE GAS PROCESSING PLANT	LA	0.0536664	0.97372	9.19237	4.59107	2.37063	17.9611	30.2662	946.504	69.3348	145.016	-415.73	3.02243	48.2186	64.6391	31.5231	41.3305	172.255	204.657	18.7941	1.90033	1.07282	1.08476	1.0327e+09	18.199	0.208947	0.23896	19.2443	1.94585	1.10563	0.111794	1.73165	0.175092	5.54686e+08
377	-113.6	32.81	1234.8	2340	26.1627	27.4709	0.116954	685	0	0	29	62.339	Electricity Generation	3.23936e+10	Hugo	OK	0.0495146	100	9.29185	4.59465	2.36291	17.9647	30.2584	1243.19	87.9324	182.771	-377.966	40.777	63.9765	82.9094	37.4152	49.3496	210.01	242.412	33.3131	2.69785	10.1903	8.25256	1.33753e+09	24.9066	0.276035	0.315684	33.8968	2.74512	11.3693	0.920738	94.6332	7.66384	7.18378e+08
1317	-98.1	29.56	1179.75	4040.34	24.9562	26.204	0.106533	20	4.6	6.9	23.2	5.4657	Electricity Generation	2.19616e+10	CANE ISLAND	FL	0.090785	1.09669	9.29749	4.60637	2.37852	17.9764	30.2741	1142.96	79.6758	167.127	-393.615	25.1331	57.1163	75.3104	34.9716	46.0144	194.366	226.768	22.7886	1.93165	2.15419	1.82597	1.21835e+09	18.7046	0.227302	0.259951	23.3193	1.97663	2.21384	0.187653	3.0455	0.258148	6.54276e+08
1661	-98.9	29.06	1125.84	2660	25.4175	26.6884	0.10382	164	4.2	6.6	27.1	16.559	Electricity Generation	2.21035e+10	W A PARISH	TX	0.0572816	39.1895	9.26699	4.60723	2.38047	17.9772	30.276	1156.37	80.737	169.165	-391.584	27.1709	58.0301	76.536	35.3322	46.5538	196.404	228.806	22.9231	2.03609	4.28429	3.80542	1.18732e+09	19.3065	0.233599	0.267152	23.4404	2.08204	4.7141	0.418719	33.681	2.99164	6.37719e+08
1664	-81.3	28.06	697.959	2080	28.5815	30.0106	0.0729683	240	0	0	0	17.3162	Electricity Generation	1.10445e+10	COTTONWOOD ENERGY PROJECT	TX	0.0432039	0.605994	9.22338	4.61248	2.40278	17.9825	30.2983	1142.75	79.3418	166.737	-394.061	24.743	57.0896	75.2334	35.0301	45.9907	193.976	226.378	11.6266	1.6658	0.534604	0.765954	8.34492e+08	13.9325	0.22251	0.25447	11.9884	1.71763	0.554589	0.0794587	0.869441	0.124569	4.48263e+08
45	-119.5	35.56	1232.95	6640	24.6885	25.9229	0.108758	20.8	1.4	7.2	23.5	9.07994	Petroleum and Natural Gas Systems	2.81465e+10	KERN RIVER GAS TRANSMISSION COMPANY: DRY LAKE COMPRESSOR STATION	NV	0.153883	100	9.29955	4.61711	2.3884	17.9871	30.2839	969.321	71.3559	148.855	-411.839	6.861	49.7937	66.1726	32.127	41.9943	176.094	208.496	29.125	2.36223	12.4241	10.0768	1.24379e+09	23.4163	0.223192	0.25525	29.6858	2.40771	13.5745	1.10098	90.9565	7.37717	6.6763e+08
971	-81.4	29.31	747.091	4310	28.6503	30.0828	0.077976	240	0	0	0	35.0052	Electricity Generation	1.06124e+10	WASHINGTON COUNTY COGEN (OLIN)	AL	0.0973301	0.519657	9.26066	4.62885	2.41567	17.9988	30.3112	1143.22	79.4072	166.861	-393.922	24.8674	57.104	75.1548	34.9742	45.9536	194.1	226.502	11.2249	1.50249	1.12212	1.50198	8.91761e+08	12.5874	0.221583	0.25341	11.6115	1.55423	1.16373	0.155768	1.45219	0.19438	4.78936e+08
483	-111.3	32.31	1559.84	2630	23.9502	25.1477	0.13535	412	0	0	0	17.2701	Cement Production	4.15331e+10	CEMEX SOUTHEAST LLC	GA	0.0565534	100	9.18482	4.62959	2.3922	17.9996	30.2877	1118.91	80.7664	167.849	-392.89	25.8557	57.8522	80.8231	36.7463	48.4342	195.089	227.491	42.585	2.73009	12.2926	7.88065	1.54791e+09	27.5112	0.258958	0.296153	43.26	2.77336	13.6609	0.875789	110.015	7.05296	8.31315e+08
2768	-99.6	28.94	1121.91	3599.47	25.7028	26.988	0.104388	197	5.7	7.9	30.2	44.8588	Electricity Generation	2.4562e+10	W A PARISH	TX	0.0800841	9.53079	9.28476	4.62959	2.40261	17.9996	30.2982	1168.27	81.6815	171.969	-388.779	29.9755	58.8229	77.2002	35.5523	46.8453	199.208	231.61	25.3709	2.26139	2.75835	2.45861	1.19382e+09	21.2519	0.239798	0.274241	25.8906	2.30772	2.8977	0.258282	9.97987	0.889541	6.41111e+08
2288	-81.8	27.19	664.712	2460	29.3695	30.8379	0.0715076	240	0	0	0	3.91749	Electricity Generation	1.04451e+10	ORANGE COGENERATION FACILITY	FL	0.0524272	0.795302	9.20867	4.63562	2.42702	18.0056	30.3226	1140.37	79.0884	164.056	-396.755	22.0624	56.9386	75.1034	34.9954	45.936	191.295	223.697	11.013	1.65681	0.618912	0.931098	8.17786e+08	13.4669	0.220781	0.252493	11.3669	1.71005	0.643065	0.0967433	1.04799	0.157661	4.39276e+08
1318	-98	29.56	1165.05	3075.93	24.9279	26.1743	0.105248	20	4.6	6.9	23.2	7.28954	Electricity Generation	2.14304e+10	CANE ISLAND	FL	0.0673769	1.09669	9.30402	4.64045	2.41311	18.0104	30.3086	1140.8	79.4996	166.78	-393.962	24.7864	56.965	75.2715	34.9418	45.9975	194.019	226.421	22.2587	1.91053	1.58401	1.3596	1.20365e+09	18.4927	0.226371	0.258886	22.7834	1.95556	1.63071	0.139969	2.45244	0.2105	6.46462e+08
2314	-81.8	27.19	652.801	2460	29.3695	30.8379	0.0702262	240	0	0	0	2.1424	Electricity Generation	1.02579e+10	ORANGE COGENERATION FACILITY	FL	0.0524272	0.795302	9.218	4.64146	2.43385	18.0115	30.3294	1140.29	79.0848	166.307	-394.504	24.3133	56.9354	75.0366	34.9921	45.9067	193.546	225.948	10.8157	1.65681	0.607822	0.931098	8.03132e+08	13.4669	0.220761	0.252471	11.1632	1.71005	0.631541	0.0967433	1.02921	0.157661	4.31404e+08
1184	-81.5	28.94	960.521	15600	27.5113	28.8869	0.0950531	240	0	0	0	6.3348	Electricity Generation	1.44585e+10	SANTA ROSA ENERGY CENTER	FL	0.371359	0.821304	9.21	4.64857	2.42582	18.0186	30.3214	1190.21	83.0464	174.279	-386.506	32.285	60.3765	78.3961	35.9803	47.3768	201.518	233.92	15.4867	1.61232	5.80812	6.04685	1.08706e+09	14.2463	0.240841	0.275435	16.0492	1.67089	6.02463	0.627225	6.5797	0.685014	5.831e+08
2726	-99.3	28.69	1013.56	3020.82	26.3065	27.6219	0.096683	200	0	7.6	0	27.7867	Electricity Generation	2.18289e+10	W A PARISH	TX	0.0660393	39.1895	9.27411	4.66543	2.44184	18.0354	30.3374	1163.32	81.2653	202.789	-357.965	60.7958	58.499	77.4219	35.5832	46.9438	230.029	262.431	22.5859	2.22837	4.25852	4.20154	1.1057e+09	20.4268	0.237051	0.2711	23.0672	2.27585	4.66278	0.460039	31.6368	3.12135	5.93844e+08
773	-96.6	30.81	1522.59	2289	24.2663	25.4796	0.133681	240	0	6.78	21	21.0423	Electricity Generation	2.72851e+10	Odessa-Ector Generating Station	TX	0.0482767	2.16812	9.19632	4.66765	2.43071	18.0376	30.3263	1163.83	81.487	170.494	-390.226	28.5005	58.5406	77.3926	35.637	46.9248	197.734	230.135	28.3509	1.86201	1.58035	1.03793	1.52883e+09	18.5442	0.237144	0.271207	29.0194	1.90592	1.64114	0.107786	3.70475	0.243319	8.21186e+08
1483	-97.1	29.31	841.331	4371	25.3146	26.5803	0.077121	51	0	7	0	0.110694	Stationary Combustion	1.4969e+10	MBI NGLP MONT BELVIEU PLANT	TX	0.0988107	0.860538	9.30806	4.67458	2.46198	18.0446	30.3575	953.207	69.8664	146.065	-414.685	4.07154	48.6906	65.1491	31.676	41.5551	173.305	205.706	15.5665	1.85022	1.5866	1.88582	8.81983e+08	17.6494	0.211232	0.241573	15.9502	1.89583	1.63103	0.193863	2.10344	0.250013	4.73634e+08
1179	-97	29.94	1177.42	2060	24.8387	26.0807	0.106076	200	0	7.4	0	4.72526	Stationary Combustion	2.1235e+10	MICHOUD	LA	0.0427184	2.20409	9.33418	4.67514	2.44746	18.0451	30.343	1156.53	80.8255	169.283	-391.453	27.2897	58.0536	76.658	35.389	46.6053	196.523	228.925	22.0819	1.87545	1.11404	0.946174	1.21312e+09	18.2025	0.233419	0.266947	22.6114	1.92043	1.15967	0.0984932	2.82436	0.239878	6.51628e+08
195	-111.9	33.31	1496.4	5114.98	25.3803	26.6494	0.136486	200	0	0	24	3.43238	Stationary Combustion	3.87953e+10	CARDINAL GLASS PLT	OK	0.116868	100	9.20973	4.68458	2.44689	18.0546	30.3424	1184.2	83.1698	173.713	-387.009	31.7195	59.9645	78.2773	36.0197	47.3135	200.953	233.354	39.9669	2.67087	14.638	9.78215	1.5609e+09	25.605	0.250461	0.286436	40.6337	2.71543	16.0532	1.07279	113.181	7.56353	8.37989e+08
478	-111.3	32.31	1428.75	2630	23.9502	25.1477	0.123975	412	0	0	0	10.7685	Cement Production	3.80426e+10	CEMEX SOUTHEAST LLC	GA	0.0565534	100	9.2624	4.68478	2.45073	18.0548	30.3463	1118.65	80.7529	167.82	-392.919	25.8266	57.8405	81.0661	36.7513	48.5409	195.06	227.461	39.0061	2.73009	11.2595	7.88065	1.41783e+09	27.5112	0.258885	0.296071	39.6244	2.77336	12.5128	0.875789	100.769	7.05296	7.61451e+08
342	-111.6	32.94	1382.11	4400	25.217	26.4779	0.125509	400	0	0	20	5.3457	Stationary Combustion	3.63771e+10	EFFINGHAM COUNTY POWER, LLC	GA	0.0995146	100	9.27946	4.69213	2.45761	18.0621	30.3531	1213.67	85.5987	178.306	-382.42	36.3126	61.9963	80.4033	34.0766	48.2476	205.546	237.948	37.3233	2.70046	12.8797	9.3189	1.43536e+09	26.0028	0.26393	0.30184	37.9491	2.74574	14.1728	1.02545	103.498	7.4884	7.7067e+08
1754	-82.1	28.06	778.771	8697.09	28.3782	29.7972	0.0802398	240	0	0	0	11.9228	Stationary Combustion	1.2283e+10	MOSAIC FAUSTINA FACILITY	LA	0.203813	0.526669	9.15476	4.69919	2.48457	18.0692	30.3801	1155.24	80.3141	168.708	-392.089	26.7143	57.9574	75.7956	35.1926	46.2374	195.947	228.349	12.9986	1.66912	2.68015	3.44151	9.17652e+08	14.1651	0.227044	0.259656	13.3848	1.71871	2.763	0.35479	3.0637	0.393402	4.92595e+08
80	-115.4	33.69	1598.84	5941.62	24.8292	26.0706	0.142285	240	0	0	0	42.817	Electricity Generation	4.65542e+10	Springerville Generating Station	AZ	0.136932	100	9.25341	4.70886	2.46967	18.0789	30.3652	1212.78	85.4019	178.109	-382.615	36.1154	61.8969	80.2355	33.3041	48.1735	205.348	237.75	47.8098	2.99027	16.9373	10.5935	1.62722e+09	29.3813	0.264814	0.302851	48.5864	3.03884	18.4354	1.15305	119.669	7.48474	8.73417e+08
354	-111.3	32.81	1457.88	2965.71	24.731	25.9676	0.130326	235	0	0	24.5	17.9552	Stationary Combustion	3.48934e+10	MID-GEORGIA COGENERATION	GA	0.0647017	100	9.31049	4.71069	2.47472	18.0807	30.3703	1147.17	80.109	167.866	-392.859	25.872	57.3942	75.6461	35.0918	46.1587	195.105	227.507	35.9094	2.46312	11.8407	8.12186	1.49045e+09	24.093	0.233713	0.267283	36.5603	2.50777	13.1636	0.902924	105.94	7.26671	8.00449e+08
646	-94.5	31.19	1426.2	2593.72	24.6485	25.881	0.12727	318	5.4	9	17.3	17.9341	Stationary Combustion	2.13222e+10	BUCKEYE FLORIDA	FL	0.0556728	0.646426	9.29989	4.71413	2.47906	18.0841	30.3746	1160.95	81.2176	170.033	-390.69	28.0393	58.3454	76.9195	35.4392	46.7176	197.272	229.674	22.3388	1.56631	1.30374	0.914135	1.45551e+09	15.3478	0.233431	0.26696	22.9749	1.61091	1.34725	0.0944643	1.93301	0.135536	7.81803e+08
772	-96.8	30.81	1274.82	2331.95	24.4569	25.6797	0.112823	240	0	6.78	21	26.1138	Electricity Generation	2.26998e+10	Odessa-Ector Generating Station	TX	0.0493192	2.27079	9.39262	4.71567	2.48539	18.0857	30.3809	1163.1	81.4085	170.358	-390.364	28.3645	58.485	76.9842	35.5065	46.7459	197.597	229.999	23.5989	1.85116	1.35097	1.05973	1.29028e+09	18.2897	0.236521	0.270494	24.1629	1.8954	1.404	0.110133	3.22809	0.253219	6.93052e+08
883	-94.9	30.56	1238.42	4495	24.7006	25.9356	0.110629	85	1.1	7.4	24.5	13.8489	Electricity Generation	1.82645e+10	J R KELLY	FL	0.10182	0.796784	9.37008	4.72027	2.49082	18.0903	30.3864	1143.81	79.7726	167.304	-393.427	25.3104	57.166	76.061	31.6737	46.3421	194.543	226.945	19.1298	1.5447	2.01218	1.62479	1.2652e+09	15.1201	0.225322	0.257686	19.6814	1.58924	2.077	0.167713	2.70448	0.218381	6.79448e+08
2455	-98.9	27.94	1076.43	9707	27.4215	28.7926	0.106036	2000	0	7.22	44.1	2.84429	Petroleum and Natural Gas Systems	2.38697e+10	FASHING GAS TREATING PLANT	TX	0.228325	10.3795	9.32923	4.72848	2.50085	18.0985	30.3964	1219.8	91.5459	145.208	-415.562	3.21437	67.0867	95.5766	41.4159	54.9166	172.447	204.849	24.9453	2.31741	6.49938	6.0379	1.21266e+09	20.5707	0.328543	0.375733	25.5417	2.37282	6.74296	0.626419	14.5715	1.35368	6.50724e+08
2700	-99.4	28.56	4240.47	36194.4	26.3723	27.6909	0.387155	240	0	6.6	0	44.7584	Electricity Generation	9.25926e+10	W A PARISH	TX	0.871224	13.9284	9.28248	4.73756	2.47147	18.1076	30.367	1391.55	99.6189	180.039	-380.717	38.0454	74.2327	94.3042	40.3391	54.3555	207.278	239.68	101.679	2.39782	92.5228	21.819	4.42764e+09	22.9645	0.331569	0.379195	103.965	2.45174	95.0286	2.24099	133.277	3.14298	2.36923e+09
2164	-98.4	28.31	745.671	3300	26.7755	28.1143	0.0724553	140	0	7.8	0	8.43548	Petroleum and Natural Gas Systems	1.56437e+10	TARGA MIDSTREAM SERVICES LLC - VENICE GAS PROCESSING PLANT	LA	0.0728155	10.9862	9.29327	4.73945	2.53015	18.1095	30.4257	962.749	70.5872	167.095	-393.669	25.1011	49.3407	65.8371	31.9102	41.8596	194.334	226.736	16.2093	2.17378	1.76159	2.36242	8.28625e+08	19.5616	0.2164	0.247483	16.5695	2.22209	1.86606	0.250252	7.53283	1.01021	4.45023e+08
2885	-97.4	27.56	658.389	2535	29.6778	31.1617	0.0710893	140	0	8	0	6.43805	Electricity Generation	1.25867e+10	O W SOMMERS	TX	0.0542476	5.00596	9.29994	4.73958	2.5313	18.1096	30.4268	1140.72	79.2759	165.032	-395.75	23.0383	56.9605	75.0726	34.9387	45.9174	192.271	224.673	13.1504	1.99736	0.97326	1.47824	8.13003e+08	16.1751	0.223149	0.255201	13.5034	2.05097	1.02742	0.156051	3.56118	0.540893	4.3669e+08
3014	-99	26.44	727.921	4680.99	28.7355	30.1722	0.0758475	121	1	8.4	28.4	49.3863	Electricity Generation	1.80006e+10	MANATEE	FL	0.106335	100	9.32341	4.74932	2.53759	18.1193	30.4331	1158.12	80.6444	179.035	-381.75	37.0409	58.118	76.2123	35.261	46.418	206.274	238.676	18.5753	2.55182	7.51411	10.3227	8.6742e+08	21.4144	0.233987	0.267596	18.9509	2.60344	8.29821	1.13999	62.2821	8.55617	4.65758e+08
1371	-98.1	29.44	1621.66	8249	25.1457	26.403	0.146571	1562	0	6.6	28.2	15.1546	Electricity Generation	3.07789e+10	CANE ISLAND	FL	0.192937	1.09669	9.29007	4.75696	2.51672	18.127	30.4123	1333.52	95.2201	196.981	-363.763	54.9877	70.2579	89.9378	39.6173	52.4365	224.221	256.623	32.1431	1.98211	6.31898	3.89661	1.67624e+09	19.1758	0.309923	0.354439	32.8406	2.02512	6.46927	0.398928	7.61286	0.469448	8.99674e+08
1838	-98.5	28.81	989.861	2104	26.1851	27.4944	0.094149	160	0	7.5	0	10.315	Electricity Generation	1.99744e+10	BAYSIDE POWER STATION	FL	0.0437864	11.0304	9.29717	4.76006	2.53768	18.1301	30.4332	1153.24	80.457	167.69	-393.065	25.6964	57.8208	77.1512	35.2681	46.8251	194.929	227.331	20.7229	2.09352	1.66577	1.68283	1.07672e+09	19.2463	0.232055	0.265386	21.1919	2.1409	1.7885	0.180682	9.18264	0.92767	5.78352e+08
2996	-80.6	25.44	529.43	5321.64	32.9078	34.5532	0.0637618	1333	0	0	24.8	28.0685	Electricity Generation	8.97684e+09	MIDULLA GENERATING STATION	FL	0.121884	0.626237	9.21768	4.77494	2.57282	18.1449	30.4684	1221.52	85.4657	181.103	-379.737	39.1095	62.5153	81.1322	36.7944	48.5878	208.343	240.744	9.4691	1.78854	1.18329	2.23503	7.29203e+08	12.9856	0.253856	0.290319	9.78292	1.84782	1.22547	0.231469	1.5097	0.285155	3.91589e+08
2881	-81.6	26.44	577.681	2960	30.4377	31.9596	0.0645304	625	0	7.4	0	16.7685	Stationary Combustion	8.6084e+09	POLK	FL	0.0645631	0.604313	9.24039	4.77538	2.57254	18.1454	30.4681	1162.7	80.7839	177.026	-383.801	35.0324	58.4674	76.9081	35.5197	46.7311	204.265	236.667	9.11883	1.57853	0.617218	1.06844	7.37993e+08	12.3563	0.229048	0.261948	9.43753	1.63369	0.641631	0.11107	0.919284	0.159134	3.96402e+08
2492	-81.8	26.94	623.231	2490.39	29.654	31.1367	0.0677409	585	0	7.5	0	24.8137	Stationary Combustion	9.73449e+09	POLK	FL	0.0531648	0.61676	9.27705	4.77646	2.57085	18.1465	30.4664	1165.12	81.0434	205.182	-355.634	63.1883	58.6263	77.0363	35.5745	46.7855	232.421	264.823	10.2722	1.64822	0.576631	0.925229	7.7471e+08	13.2594	0.23109	0.264283	10.6073	1.70199	0.598557	0.0960411	0.896036	0.143773	4.16137e+08
151	-113	33.44	1432.07	3230	24.909	26.1545	0.128714	485	6.3	8.3	25	5.40016	Electricity Generation	3.86501e+10	LAKE CATHERINE	AR	0.0711165	100	9.3453	4.77673	2.54123	18.1467	30.4368	1226.84	86.7098	180.375	-380.351	38.3814	62.9054	81.6736	37.1162	48.8052	207.614	240.016	39.6416	2.76813	12.2188	8.53226	1.47202e+09	26.93	0.270756	0.309647	40.2841	2.813	13.5285	0.944684	105.151	7.34255	7.90489e+08
2776	-100.4	29.06	15350.3	27693	25.2624	26.5256	1.34737	1100	0	7.08	29.5	96.1777	Electricity Generation	3.58183e+11	W A PARISH	TX	0.664879	20.4535	9.25026	4.77691	2.49361	18.1469	30.3891	1505.48	109.089	169.552	-391.192	27.5588	82.0441	114.713	43.1428	63.3129	196.792	229.194	388.029	2.52783	278.117	18.1181	1.54091e+10	25.1819	0.384458	0.43968	395.846	2.57876	285.951	1.86284	481.515	3.13685	8.24932e+09
1452	-80.9	28.44	592.332	6217.17	31.1477	32.705	0.0670611	553	0	7.2	25	12.3751	Stationary Combustion	1.04773e+10	WILLOW GLEN	LA	0.143621	0.634258	9.26245	4.77695	2.57194	18.147	30.4675	1174.73	81.9127	171.75	-389.05	29.7559	59.3017	75.9025	35.5999	46.2848	198.989	231.391	10.9896	1.8553	1.60939	2.71704	7.66935e+08	14.3292	0.235615	0.269458	11.3208	1.91123	1.66114	0.28044	1.96387	0.331549	4.11799e+08
2292	-80.4	27.19	950.614	35119	32.412	34.0326	0.108604	1320	0	7.4	29.1	16.9081	Stationary Combustion	1.63767e+10	GUADALUPE GENERATING STATION	TX	0.845121	0.725088	9.31804	4.78019	2.55166	18.1502	30.4472	1405.81	100.148	147.632	-413.193	5.63845	75.2453	95.2107	41.003	54.7657	174.871	207.273	18.5311	1.94938	15.7185	16.5351	1.24203e+09	14.9199	0.32957	0.376909	19.2076	2.02055	16.2978	1.71445	16.8565	1.77322	6.64785e+08
1415	-97	29.44	918.451	2573.05	25.1595	26.4174	0.083859	51	0	7	0	11.9686	Stationary Combustion	1.61952e+10	MBI NGLP MONT BELVIEU PLANT	TX	0.0551712	0.860538	9.25791	4.78933	2.57248	18.1593	30.468	950.84	69.6808	145.686	-415.061	3.69265	48.5153	64.9652	31.6286	41.4738	172.926	205.328	16.8604	1.83574	0.982908	1.07018	9.59041e+08	17.5805	0.210342	0.240555	17.2784	1.88125	1.01307	0.110302	1.52686	0.166243	5.15122e+08
736	-95.8	30.94	1280.69	2550	24.5121	25.7377	0.113634	300	0	7.1	0	29.8253	Electricity Generation	2.0408e+10	S O PURDOM	FL	0.0546117	0.929118	9.42889	4.79673	2.56616	18.1667	30.4617	1163.53	81.4216	170.414	-390.31	28.42	58.5109	76.7871	35.5671	46.6595	197.653	230.055	21.3142	1.66428	1.24111	0.969091	1.29956e+09	16.4011	0.235263	0.269056	21.8822	1.70862	1.28251	0.100142	2.03422	0.158838	6.98033e+08
2956	-81.5	26.44	579.568	2752.16	30.3742	31.893	0.0646082	520	0	0	0	42.2749	Stationary Combustion	8.57951e+09	POLK	FL	0.0595184	0.607739	9.26192	4.80795	2.60504	18.1779	30.5006	1156.18	80.2329	173.76	-387.065	31.7667	57.9916	76.3563	35.2979	46.4886	201	233.402	9.09158	1.56868	0.569791	0.983129	7.38883e+08	12.3045	0.226088	0.258563	9.41077	1.62375	0.592652	0.102258	0.872221	0.150495	3.96888e+08
2748	-99.5	28.81	1370.2	2275	25.9027	27.1979	0.128795	2000	0	7.85	34.5	41.9148	Electricity Generation	2.95736e+10	W A PARISH	TX	0.0479369	9.53079	9.36165	4.8105	2.57497	18.1805	30.4705	1372.95	98.5332	204.027	-356.723	62.0332	72.9521	92.8953	40.7581	53.7359	231.266	263.668	30.5931	2.23275	2.36296	1.72454	1.47295e+09	20.77	0.329772	0.37714	31.235	2.27959	2.51449	0.183513	11.2541	0.821351	7.91154e+08
812	-97	30.69	1371.77	5459.41	24.5397	25.7667	0.121229	30	3.6	6.7	24.5	21.8497	Stationary Combustion	2.48544e+10	PUTNAM	FL	0.125228	2.27079	9.32744	4.81113	2.57797	18.1811	30.4735	1148.48	80.193	168.074	-392.648	26.0804	57.4806	75.5865	35.0691	46.1323	195.313	227.715	25.7792	1.87926	3.42932	2.49992	1.38642e+09	18.594	0.229684	0.262675	26.3836	1.92332	3.532	0.257478	5.49126	0.400304	7.44407e+08
1977	-81.6	27.56	656.591	6280	28.9375	30.3843	0.0692743	240	0	0	0	18.5919	Stationary Combustion	1.03224e+10	BAYTOWN ENERGY CENTER	TX	0.145146	0.769462	9.29742	4.8141	2.60727	18.1841	30.5028	1148.75	79.7556	183.663	-377.144	41.6695	57.5023	75.6401	35.092	46.1709	210.902	243.304	10.8521	1.6528	1.61406	2.45825	7.92246e+08	13.6979	0.224059	0.256241	11.1941	1.70488	1.66892	0.25418	2.04831	0.311962	4.25394e+08
2203	-82.3	27.44	1149.37	2500	29.0373	30.4892	0.122204	1490	0	7.2	28.5	14.923	Stationary Combustion	1.82609e+10	TROPICANA MANUFACTURING CO INC	FL	0.0533981	0.43467	9.32657	4.81646	2.58297	18.1865	30.4785	1505.49	100.69	159.751	-401.056	17.7577	75.5054	96.7958	38.1366	55.4584	186.991	219.393	19.2309	1.67317	1.06568	0.927192	1.39757e+09	13.7602	0.284343	0.325184	19.836	1.72582	1.10322	0.0959852	1.48143	0.128891	7.50704e+08
2727	-99.1	28.69	974.145	2544	26.1527	27.4603	0.0924832	145	0	7.4	28	21.5363	Electricity Generation	2.06192e+10	W A PARISH	TX	0.054466	39.1895	9.33057	4.82007	2.59852	18.1901	30.4941	1155.17	80.6003	202.784	-357.971	60.7906	57.9427	76.3028	35.2946	46.4527	230.024	262.425	21.3487	2.19153	3.80955	3.91066	1.05767e+09	20.1846	0.233449	0.26698	21.8092	2.2388	4.19112	0.430235	29.995	3.07911	5.68084e+08
1178	-97	29.94	1108.43	2060	24.8387	26.0807	0.0998606	35	0	7.2	0	4.32784	Stationary Combustion	1.99908e+10	MICHOUD	LA	0.0427184	2.20409	9.38988	4.82504	2.59999	18.195	30.4955	1139.94	79.465	166.682	-394.055	24.6879	56.9088	75.3717	34.9568	46.0406	193.921	226.323	20.7881	1.87545	1.04877	0.946174	1.14204e+09	18.2025	0.226147	0.258629	21.2866	1.92043	1.09173	0.0984932	2.65888	0.239878	6.13448e+08
1978	-82.1	27.69	663.901	6148.28	28.8205	30.2615	0.069747	240	0	0	0	11.7233	Stationary Combustion	1.05057e+10	CEDAR BAYOU	TX	0.141949	0.526669	9.31612	4.83056	2.62335	18.2006	30.5189	1148.87	79.7885	154.425	-406.38	12.4312	57.5176	70.3759	33.3819	43.8594	181.664	214.066	11.0396	1.66284	1.59388	2.40078	7.97652e+08	13.8401	0.22435	0.256575	11.384	1.71471	1.64637	0.247984	1.90782	0.287365	4.28301e+08
1939	-97.3	28.69	1422.53	12051	26.1598	27.4677	0.134151	2000	0	7.1	23.89	6.96147	Electricity Generation	2.49463e+10	MULBERRY COGENERATION FACILITY	FL	0.285218	2.27587	9.26967	4.83577	2.59874	18.2058	30.4943	1346.82	96.0857	170.27	-390.49	28.2767	71.1841	90.7256	39.8955	52.7853	197.51	229.912	26.0436	1.83079	7.65107	5.37848	1.5342e+09	16.9754	0.313016	0.357977	26.8076	1.8845	7.89885	0.555266	10.0711	0.707969	8.23491e+08
2882	-97.8	27.44	729.771	3850	28.168	29.5764	0.0746576	635	0	7.5	0	11.9831	Stationary Combustion	1.50321e+10	ALBEMARLE CORPORATION BAYPORT PLANT	TX	0.086165	5.00596	9.35839	4.84173	2.63083	18.2117	30.5264	1041.42	76.0171	181.204	-379.576	39.2106	54.0141	69.3533	34.6106	43.4061	208.444	240.845	15.6115	2.13923	1.61809	2.21726	8.53811e+08	18.2845	0.238325	0.272557	15.9818	2.18998	1.68672	0.23113	4.34718	0.595692	4.58528e+08
1592	-81.9	28.31	929.551	2840	27.9058	29.3011	0.0947888	1996	0	7.4	26.1	16.4503	Electricity Generation	1.43938e+10	SIM GIDEON	TX	0.0616505	0.850795	9.33922	4.84404	2.62135	18.214	30.5169	1279.31	90.4612	188.18	-372.614	46.1868	66.5155	84.0893	38.423	49.8778	215.42	247.822	15.1447	1.62925	0.992572	1.0678	1.08404e+09	13.9706	0.281943	0.32244	15.6146	1.6798	1.02948	0.11075	1.60366	0.17252	5.8227e+08
2472	-97.8	28.06	985.224	7271.18	27.0594	28.4124	0.0962754	2000	0	5.7	0	29.4735	Petroleum and Natural Gas Systems	1.92152e+10	YOAKUM CRYOGENIC PLANT	TX	0.169203	3.3567	9.36037	4.84912	2.62575	18.2191	30.5213	1168.2	87.328	187.797	-372.975	45.8032	63.4987	81.5008	40.1514	48.7375	215.036	247.438	20.0242	2.03245	3.62416	3.67851	1.10104e+09	18.1866	0.304527	0.348268	20.4893	2.07966	3.73449	0.37905	6.03403	0.612453	5.9105e+08
2573	-99.5	27.69	1077.33	5100	27.3741	28.7428	0.106666	2000	5.7	8.7	36.1	12.4464	Stationary Combustion	2.43626e+10	J K SPRUCE	TX	0.116505	10.3795	9.42715	4.85307	2.62517	18.2231	30.5207	1383.59	99.3386	185.191	-375.573	43.1977	73.7159	93.7012	40.9445	54.0922	212.431	244.833	25.1695	2.33628	3.74089	3.47237	1.21987e+09	20.6329	0.333366	0.38125	25.6989	2.38542	3.91114	0.36304	11.7909	1.09445	6.54982e+08
3093	-97.8	26.81	786.215	2140	28.669	30.1024	0.0822202	925	0	7.81	28.8	53.5166	Electricity Generation	1.48112e+10	J T DEELY	TX	0.0446602	4.75327	9.26209	4.85889	2.64301	18.2289	30.5386	1214.32	85.2026	186.687	-374.103	44.6932	61.9924	81.2957	36.643	48.6508	213.926	246.328	15.4649	1.967	0.976065	1.24147	9.403e+08	16.4468	0.255333	0.292009	15.8729	2.0189	1.03275	0.131358	3.81542	0.48529	5.05086e+08
343	-111.5	32.94	1295.81	3013.93	25.6524	26.935	0.120074	810	0	0	27	5.35866	Stationary Combustion	3.33374e+10	EFFINGHAM COUNTY POWER, LLC	GA	0.0658721	100	9.34956	4.87898	2.64619	18.249	30.5417	1262.29	89.6199	185.924	-374.803	43.9308	65.3514	85.8505	35.1278	50.6392	213.164	245.566	34.2706	2.64473	11.0261	8.50906	1.37321e+09	24.9566	0.284982	0.325916	34.87	2.69099	12.2454	0.945001	97.722	7.5414	7.37468e+08
2125	-81.9	27.56	664.327	2460	28.8348	30.2765	0.070126	240	0	0	0	2.27284	Stationary Combustion	1.0402e+10	WHEELABRATOR RIDGE ENERGY INC.	FL	0.0524272	0.769462	9.35616	4.88138	2.67385	18.2514	30.5694	1141.49	79.214	169.72	-391.086	27.7261	57.0179	75.1585	34.9751	45.9592	196.959	229.361	10.9591	1.64965	0.613957	0.924179	8.01986e+08	13.6649	0.221635	0.25347	11.3064	1.70193	0.637476	0.0959582	1.02167	0.153791	4.30788e+08
1912	-96.5	28.69	780.351	3082.82	26.9228	28.269	0.0763275	256	3.5	7.2	23.3	4.5187	Petroleum Refining	1.29399e+10	VALERO REFINING HOUSTON REFINERY	TX	0.0675441	0.654027	9.4155	4.88404	2.67197	18.254	30.5675	1122.42	78.8063	199.328	-361.435	57.334	56.4517	76.1631	35.2422	46.3926	226.567	258.969	13.5435	1.73556	0.951235	1.21898	8.72909e+08	15.5153	0.226394	0.258912	13.9231	1.78421	0.981787	0.125814	1.3372	0.171358	4.68845e+08
1203	-103.1	29.69	1343.03	2628.16	24.3797	25.5987	0.118482	200	0.8	8	34.6	71.4864	Stationary Combustion	3.46585e+10	ONSHORE TREATING FACILITY	AL	0.0565088	100	9.47606	4.88463	2.65236	18.2546	30.5479	991.608	73.0586	152.045	-408.686	10.0514	51.2691	69.571	32.56	43.493	179.284	211.686	35.5828	2.64943	10.6632	7.9396	1.35501e+09	26.2602	0.234766	0.268487	36.1742	2.69347	11.8611	0.88316	96.2084	7.16351	7.27724e+08
1437	-98.1	29.31	1078.77	2814.16	25.1771	26.436	0.0984714	119	0	7.2	0	15.3832	Electricity Generation	2.08026e+10	HAYS ENERGY PROJECT	TX	0.0610232	2.1097	9.40737	4.88831	2.66389	18.2583	30.5594	1151.93	80.392	168.493	-392.251	26.4999	57.7251	76.0014	35.2487	46.3184	195.733	228.135	21.579	2.00033	1.46853	1.3613	1.12616e+09	19.1616	0.231623	0.264892	22.0698	2.04583	1.51891	0.1408	2.99793	0.277903	6.04854e+08
290	-112.8	32.94	1062	2140	25.8699	27.1634	0.0994205	296	0	0	0	11.9916	Electricity Generation	2.84473e+10	Hugo	OK	0.0446602	100	9.41857	4.89054	2.66569	18.2605	30.5612	1188.62	83.5198	174.339	-386.392	32.3452	60.2609	79.1806	36.2317	47.7116	201.578	233.98	29.2313	2.75248	8.56586	8.06579	1.13701e+09	25.709	0.253059	0.289407	29.7279	2.79924	9.56591	0.900745	80.3488	7.56581	6.10695e+08
266	-113.1	32.81	1298.11	2750	25.4206	26.6916	0.119373	700	0.4	9.1	30	33.5407	Electricity Generation	3.41764e+10	Hugo	OK	0.059466	100	9.36956	4.89547	2.66291	18.2655	30.5584	1251.33	88.6553	184.113	-376.621	42.1197	64.5667	73.5839	37.6415	45.2552	211.353	243.755	35.1064	2.70442	10.8051	8.32369	1.36519e+09	25.7154	0.280478	0.320765	35.702	2.75031	12.0137	0.925476	96.9939	7.47193	7.33185e+08
1864	-98.4	28.81	1174.47	3080	26.1758	27.4846	0.111509	2000	0	5.8	0	21.8034	Electricity Generation	2.3656e+10	BAYSIDE POWER STATION	FL	0.0674757	11.0304	9.47309	4.89981	2.67003	18.2698	30.5656	1355.28	97.033	197.035	-363.72	55.0417	71.7529	91.5638	40.4269	53.1522	224.275	256.677	24.5308	2.08867	2.55346	2.17413	1.27526e+09	19.2359	0.320504	0.36654	25.0858	2.13592	2.71183	0.230898	11.4684	0.97647	6.84915e+08
3032	-97.6	26.31	655.691	2896.82	29.8612	31.3542	0.0713649	30	1.7	6.4	25.3	33.4824	Stationary Combustion	1.15739e+10	VANDOLAH POWER PROJECT	FL	0.0630296	6.29155	9.3666	4.90343	2.69494	18.2734	30.5905	1129.88	78.2886	166.968	-393.826	24.9749	56.1851	74.0048	34.5397	45.4508	194.208	226.61	12.1382	1.85121	1.09296	1.66688	8.16155e+08	14.8724	0.217002	0.248171	12.492	1.90516	1.15942	0.176825	4.35616	0.664362	4.38374e+08
53	-119.6	35.44	1165.88	7734	24.7343	25.971	0.102857	702	0	7.52	0	3.6478	Petroleum and Natural Gas Systems	2.63481e+10	Arkansas Loop & Simpson Treating Plants	CO	0.180437	100	9.43447	4.91317	2.68686	18.2832	30.5824	1072.83	85.3608	165.086	-395.61	23.0927	61.5675	84.2467	36.1054	49.9295	192.326	224.728	27.4877	2.35768	12.4711	10.6967	1.17631e+09	23.3678	0.279279	0.319393	28.0663	2.4073	13.5805	1.16482	86.752	7.4409	6.31303e+08
702	-96.6	30.94	1225.3	2787	24.0669	25.2702	0.106591	40	0	7.1	22	14.7146	Electricity Generation	2.1727e+10	Odessa-Ector Generating Station	TX	0.0603641	2.16812	9.48162	4.91531	2.68743	18.2853	30.583	1144.35	79.908	167.468	-393.25	25.4742	57.2025	65.222	33.3276	41.5813	194.707	227.109	22.5716	1.84212	1.53128	1.24972	1.21901e+09	18.5163	0.22862	0.261458	23.1046	1.88562	1.58618	0.129452	3.23151	0.263731	6.54734e+08
2899	-99.3	27.44	864.521	4708.54	27.528	28.9044	0.0861102	246	1.3	8.5	27.8	19.7945	Stationary Combustion	2.18095e+10	J K SPRUCE	TX	0.107004	10.3795	9.33468	4.917	2.69886	18.287	30.5944	1178.65	82.4533	171.984	-388.786	29.9903	59.5647	78.0708	35.7918	47.2313	199.223	231.625	22.4592	2.59788	3.05592	3.53482	9.84788e+08	22.8062	0.244645	0.279785	22.8864	2.6473	3.1893	0.368909	9.55052	1.10472	5.2876e+08
3016	-97.6	26.44	844.851	5403	29.3855	30.8548	0.0901822	1355	0	8.8	25	42.981	Stationary Combustion	1.57823e+10	VANDOLAH POWER PROJECT	FL	0.123859	6.29155	9.37463	4.93432	2.71397	18.3043	30.6095	1258.67	88.7947	170.169	-390.623	28.1758	65.0639	85.1211	37.7667	50.3305	197.409	229.811	16.473	1.94981	2.45468	2.90546	1.03136e+09	15.9722	0.273636	0.31294	16.9191	2.00262	2.56562	0.303677	6.60409	0.781688	5.53803e+08
1435	-99.1	29.44	1235.43	2694	24.263	25.4761	0.108672	585	0	6.7	0	36.0367	Electricity Generation	2.43445e+10	W A PARISH	TX	0.0581068	4.10697	9.4955	4.94587	2.71717	18.3159	30.6127	1209.38	85.1226	177.494	-383.246	35.5006	61.6694	80.5219	36.8289	48.3021	204.734	237.135	25.201	2.03986	1.79028	1.44912	1.24281e+09	20.2774	0.257839	0.294874	25.743	2.08373	1.86566	0.151014	5.04315	0.408212	6.67512e+08
1438	-97	29.44	870.821	2573.05	25.1595	26.4174	0.0795101	51	0	7	0	7.7744	Stationary Combustion	1.53553e+10	MBI NGLP MONT BELVIEU PLANT	TX	0.0551712	0.860538	9.3029	4.94837	2.73419	18.3184	30.6297	950.672	69.6722	145.668	-415.079	3.67409	48.5079	64.9553	31.6257	41.4695	172.907	205.309	15.986	1.83574	0.931935	1.07018	9.09306e+08	17.5805	0.210297	0.240503	16.3824	1.88125	0.960532	0.110302	1.44768	0.166243	4.88408e+08
2267	-80.4	27.06	503.29	2240	31.8313	33.4228	0.0587005	83	0	7.1	25	7.77	Stationary Combustion	8.5895e+09	GUADALUPE GENERATING STATION	TX	0.0470874	0.725088	9.24977	4.95429	2.7571	18.3243	30.6526	1126.7	77.898	165.852	-394.974	23.8579	55.9913	73.9261	34.6461	45.4217	193.091	225.493	9.05607	1.79937	0.457509	0.909036	6.7132e+08	13.4899	0.214109	0.244863	9.34617	1.85701	0.475359	0.0944503	0.778421	0.154666	3.60609e+08
589	-91.6	31.44	1476.57	5400	24.2867	25.501	0.129408	220	0	7	22	63.6485	Petroleum and Natural Gas Systems	2.10463e+10	FLORIDA GAS TRANSMISSION COMPANY - MT VERNON	AL	0.123786	0.342785	9.45715	4.95434	2.71864	18.3243	30.6142	967.97	71.1171	148.421	-412.296	6.42769	49.6455	65.9376	32.0926	41.8955	175.661	208.063	22.0507	1.49337	2.76198	1.87053	1.47995e+09	14.8996	0.216139	0.247184	22.6965	1.53711	2.84626	0.192762	3.162	0.214145	7.94705e+08
295	-114.6	32.56	1398.29	8830	27.6713	29.0549	0.138261	168	0	7.6	0	12.8959	Electricity Generation	3.80424e+10	Ocotillo Power Plant	AZ	0.207039	100	9.37376	4.96426	2.72613	18.3343	30.6217	1202.1	84.4254	176.405	-384.334	34.4111	61.1904	79.5739	32.8997	47.8857	203.644	236.046	39.4318	2.82	18.2607	13.0593	1.5812e+09	24.9379	0.255673	0.292397	40.198	2.87479	19.7684	1.41376	118.111	8.44683	8.48475e+08
263	-113	32.94	1134.55	3700	25.3673	26.6356	0.103867	273	0	8.14	25.62	32.3825	Electricity Generation	3.06445e+10	Hugo	OK	0.0825243	100	9.47325	4.96714	2.74038	18.3371	30.6359	1194.41	83.9448	175.191	-385.543	33.1976	60.6399	79.1213	36.2428	47.6861	202.431	234.832	31.4372	2.77089	10.1794	8.97222	1.18786e+09	26.4653	0.255566	0.292275	31.955	2.81653	11.2416	0.990844	85.1719	7.5071	6.3785e+08
1821	-98.6	28.81	1017.73	2828	26.0521	27.3547	0.0962165	842	0	7.2	27	22.7856	Electricity Generation	2.03873e+10	BAYSIDE POWER STATION	FL	0.0613592	11.0304	9.44238	4.97378	2.75041	18.3438	30.646	1229.03	86.6624	192.278	-368.477	50.2845	63.0387	81.8463	37.1189	48.8862	219.518	251.919	21.1448	2.07764	2.07247	2.03636	1.10037e+09	19.2161	0.265112	0.303192	21.6238	2.1247	2.20623	0.216779	9.76208	0.959201	5.91002e+08
178	-112.8	33.31	1105.17	2910.6	25.6804	26.9645	0.102507	525	0	0	30	1.81785	Electricity Generation	2.85978e+10	Comanche (8059)	OK	0.063364	100	9.4922	4.99127	2.76508	18.3613	30.6606	1221.77	86.2822	179.581	-381.146	37.5876	62.5589	82.0132	36.9331	48.9544	206.821	239.222	29.396	2.65986	9.34842	8.4588	1.1723e+09	25.0754	0.2672	0.30558	29.9078	2.70617	10.3882	0.93996	83.3605	7.54277	6.29585e+08
366	-113.4	32.44	1037.97	2310	25.9721	27.2707	0.0976634	240	0	0	0	72.2793	Electricity Generation	2.85897e+10	Hugo	OK	0.0487864	100	9.45608	4.99444	2.7704	18.3644	30.6659	1184.92	83.0787	173.575	-387.168	31.5812	59.9445	78.5699	36.0228	47.4456	200.814	233.216	29.3555	2.82816	8.56422	8.25092	1.11691e+09	26.2827	0.251098	0.287165	29.8425	2.87508	9.54831	0.919901	79.078	7.61852	5.99883e+08
2334	-80.5	26.94	722.531	26952.1	30.3154	31.8312	0.0781496	119.7	0	0	0	17.4137	Stationary Combustion	1.12035e+10	GUADALUPE GENERATING STATION	TX	0.646895	0.719073	9.43749	5.01579	2.80262	18.3858	30.6982	1237.88	86.612	166.305	-394.516	24.3111	63.6552	81.0789	36.9657	48.561	193.544	225.946	12.4369	1.72129	8.08639	11.1918	8.93747e+08	13.9154	0.258114	0.295188	12.9166	1.78769	8.40215	1.16288	8.80124	1.21811	4.78846e+08
1332	-98	29.56	1221.6	3075.93	24.9279	26.1743	0.110356	123	0	0	0	9.05233	Stationary Combustion	2.24705e+10	LONGHORN GLASS MANUFACTURING LP	TX	0.0673769	1.09669	9.55596	5.04477	2.81542	18.4148	30.711	1151.55	80.3795	168.463	-392.279	26.4694	57.7052	76.3132	35.2038	46.4548	195.702	228.104	23.339	1.91053	1.66089	1.3596	1.26207e+09	18.4927	0.231075	0.264266	23.8892	1.95556	1.70986	0.139969	2.57147	0.2105	6.77839e+08
568	-93	31.81	999.331	4315.89	23.8786	25.0725	0.0861914	191	0	0	0	1.1115	Stationary Combustion	1.42619e+10	GULF SOUTH PIPELINE - CARTHAGE JCT STATION	TX	0.097473	0.376963	9.41979	5.04746	2.82926	18.4175	30.7248	962.694	70.7867	147.728	-412.987	5.73391	49.3443	65.9356	32.4602	41.894	174.967	207.369	14.9386	1.49486	1.47984	1.48083	9.85716e+08	15.1551	0.214656	0.245489	15.3692	1.53795	1.52501	0.152603	1.7563	0.175747	5.29368e+08
1650	-100.3	29.06	1045.18	2111.51	25.1086	26.364	0.0952181	105	0	7.4	0	90.5349	Electricity Generation	2.36195e+10	W A PARISH	TX	0.0439687	20.4535	9.48265	5.05344	2.83054	18.4234	30.7261	1158.43	80.8501	169.375	-391.37	27.381	58.0984	76.4417	35.3787	46.5116	196.614	229.016	24.3735	2.33199	2.4939	2.3861	1.08895e+09	22.3826	0.236529	0.270503	24.8483	2.37742	2.70639	0.25894	16.5725	1.58561	5.84902e+08
2862	-99.1	27.44	867.641	6086.28	27.2734	28.6371	0.085435	302	1.1	8.1	30.5	22.711	Stationary Combustion	2.13445e+10	J K SPRUCE	TX	0.140444	10.3795	9.4059	5.06302	2.84528	18.433	30.7408	1190.47	83.3745	174.488	-386.283	32.4944	60.3775	78.7202	36.0831	47.5167	201.727	234.129	22.0545	2.54189	3.745	4.3163	9.77066e+08	22.5722	0.249148	0.284935	22.5934	2.604	3.90752	0.450361	10.2176	1.17763	5.24513e+08
1022	-90.9	30.06	720.421	2021.96	25.6144	26.8951	0.0671537	338	0	0	0	2.49744	Stationary Combustion	8.917e+09	CHEVRON PASCAGOULA REFINERY	MS	0.0417951	0.302084	9.44754	5.07214	2.86703	18.4421	30.7626	989.034	71.8463	150.277	-410.472	8.28336	50.4084	67.3943	31.9188	42.5405	177.516	209.918	9.45729	1.31275	0.410083	0.569227	7.67994e+08	12.3143	0.21238	0.242886	9.79215	1.35923	0.426076	0.0591427	0.570523	0.0791931	4.12551e+08
1692	-99.4	29.06	1018.62	3578.8	25.5222	26.7983	0.094124	400	0	7.2	24	34.1014	Electricity Generation	2.15025e+10	W A PARISH	TX	0.0795825	39.1895	9.48926	5.09528	2.87292	18.4653	30.7685	1190.31	83.512	174.464	-386.283	32.4704	60.3554	79.2092	32.7821	47.7271	201.703	234.105	22.2334	2.18271	4.46312	4.38155	1.07644e+09	20.6547	0.249181	0.284972	22.7021	2.22872	4.86281	0.477393	31.1209	3.05521	5.78082e+08
574	-93	31.81	1026.62	4315.89	23.8786	25.0725	0.0885454	91	0	7	0	7.77761	Stationary Combustion	1.46514e+10	GULF SOUTH PIPELINE - CARTHAGE JCT STATION	TX	0.097473	0.376963	9.46226	5.09956	2.88006	18.4696	30.7756	954.506	70.1111	146.431	-414.284	4.43705	48.7725	65.2692	31.7457	41.6014	173.67	206.072	15.3466	1.49486	1.52026	1.48083	1.01264e+09	15.1551	0.211045	0.241358	15.789	1.53795	1.56666	0.152603	1.80427	0.175747	5.43826e+08
365	-113.5	32.44	1007.06	2310	25.8713	27.1649	0.0944559	240	0	0	0	78.6827	Electricity Generation	2.67343e+10	Hugo	OK	0.0487864	100	9.50026	5.1059	2.88337	18.4759	30.7789	1182.86	82.8806	173.22	-387.526	31.2262	59.7964	78.4573	35.9838	47.3968	200.459	232.861	27.4757	2.7283	8.23827	8.18051	1.08023e+09	25.435	0.249474	0.285307	27.9465	2.77506	9.19011	0.912567	76.4369	7.59009	5.80186e+08
1336	-98.1	29.56	1321.27	4040.34	24.9562	26.204	0.119312	1562	0	6.6	28.2	14.2973	Electricity Generation	2.45961e+10	CANE ISLAND	FL	0.090785	1.09669	9.48857	5.10669	2.87415	18.4767	30.7697	1307.35	93.1559	192.894	-367.847	50.9004	68.4524	87.8745	39.0317	51.5302	220.133	252.535	25.5223	1.93165	2.4126	1.82597	1.3645e+09	18.7046	0.299362	0.342362	26.1166	1.97663	2.4794	0.187653	3.41083	0.258148	7.32762e+08
1046	-97.4	30.19	1211.05	3740	24.6984	25.9333	0.108105	100	0	8.1	0	11.8608	Stationary Combustion	2.29426e+10	SAN JACINTO COUNTY PEAKING FACILITY	TX	0.0834951	3.99788	9.58767	5.1077	2.87922	18.4777	30.7748	1152.83	80.535	168.725	-392.006	26.7317	57.7911	76.1177	35.2431	46.367	195.965	228.367	23.7851	1.96401	2.30156	1.90047	1.23633e+09	19.2385	0.232284	0.265648	24.3244	2.00854	2.38905	0.197271	5.46565	0.451314	6.63953e+08
3036	-98.3	26.31	784.705	8483	28.3316	29.7482	0.0801358	82	0	7.8	0	5.12385	Stationary Combustion	1.86212e+10	HARDEE POWER STATION	FL	0.198617	100	9.38717	5.11388	2.89934	18.4839	30.7949	1169.97	81.5178	165.205	-395.583	23.2112	58.9802	76.9146	33.9473	46.727	192.444	224.846	19.4129	2.47391	9.70779	12.3713	9.16462e+08	21.1824	0.23776	0.271911	19.8607	2.53098	10.5796	1.34822	67.5863	8.61295	4.91838e+08
745	-96.9	30.94	1115.51	2331.95	24.3798	25.5988	0.0983531	25	0	7.5	21	30.6016	Electricity Generation	1.9971e+10	Odessa-Ector Generating Station	TX	0.0493192	2.27079	9.5604	5.14775	2.92339	18.5178	30.8189	1141.98	79.6922	167.062	-393.656	25.0688	57.0234	75.2928	35.018	46.0026	194.302	226.704	20.7551	1.8606	1.18672	1.06384	1.1248e+09	18.4522	0.227447	0.260117	21.247	1.9047	1.23296	0.110529	2.8231	0.253078	6.04166e+08
1244	-97.8	29.69	812.439	2060	24.8733	26.117	0.073316	180	0	7.9	0	6.42818	Stationary Combustion	1.50626e+10	LAGRANGE PLANT	TX	0.0427184	1.09669	9.55486	5.15528	2.94534	18.5253	30.8409	965.433	70.9202	148.018	-412.723	6.02412	49.528	66.1803	32.0209	42.0061	175.257	207.659	15.6473	1.92596	0.727144	0.895014	8.38469e+08	18.6617	0.217803	0.249087	16.0131	1.97099	0.750687	0.0923992	1.32318	0.162865	4.50381e+08
2789	-99.6	29.06	1172.42	2214.84	25.4338	26.7055	0.108194	1650	0	6.9	35	59.6367	Electricity Generation	2.60888e+10	W A PARISH	TX	0.0464767	9.53079	9.61356	5.16401	2.93549	18.534	30.831	1344.7	96.2184	175.988	-384.76	33.994	70.9846	90.8606	40.1786	52.8423	203.227	235.629	26.9447	2.29822	2.00534	1.71043	1.23735e+09	21.7761	0.31816	0.363859	27.484	2.34422	2.13185	0.181834	9.47357	0.808038	6.64606e+08
1858	-99.1	28.81	1075.19	2020	25.9466	27.2439	0.10134	1800	0	7.6	29	15.0558	Electricity Generation	2.20172e+10	W A PARISH	TX	0.0417476	39.1895	9.57384	5.1643	2.93861	18.5343	30.8341	1334.21	95.3398	155.526	-405.227	13.5328	70.3052	89.9617	39.8809	52.4486	182.766	215.168	22.8233	2.12272	3.85307	3.58361	1.15896e+09	19.6929	0.311996	0.356809	23.3283	2.16969	4.26501	0.396674	32.5421	3.02664	6.22532e+08
2699	-99.4	28.56	6753.74	36194.4	26.3723	27.6909	0.616616	2000	0	7	0	39.1897	Electricity Generation	1.47471e+11	W A PARISH	TX	0.871224	13.9284	9.50503	5.18998	2.91592	18.56	30.8115	1632.83	119.432	185.172	-375.584	43.1783	90.8903	112.734	47.0661	62.4462	212.411	244.813	161.942	2.39782	147.36	21.819	7.05185e+09	22.9645	0.437482	0.50032	165.584	2.45174	151.351	2.24099	212.268	3.14298	3.77345e+09
1826	-99.4	28.81	836.69	2275	25.9278	27.2242	0.0787492	72	0	7.3	23	30.7718	Electricity Generation	1.78761e+10	W A PARISH	TX	0.0479369	39.1895	9.60728	5.19018	2.97649	18.5602	30.872	1147.69	79.995	181.612	-379.14	39.6185	57.4168	75.7408	35.1885	46.2053	208.852	241.253	18.4995	2.21104	3.14053	3.75351	9.00605e+08	20.5412	0.230529	0.263641	18.8919	2.25793	3.46296	0.413888	25.4356	3.04003	4.83736e+08
1397	-96	29.44	1218.3	12883	25.6401	26.9221	0.111968	2000	0	7.7	0	16.5945	Electricity Generation	1.92038e+10	DEER PARK ENERGY CENTER	TX	0.305413	0.544521	9.62415	5.19378	2.96386	18.5638	30.8594	1358.69	96.9977	200.884	-359.867	58.8903	71.9936	91.2066	40.0929	52.9947	228.123	260.525	20.3325	1.66892	6.25433	5.13365	1.2805e+09	15.8785	0.316598	0.362073	20.9839	1.72239	6.4592	0.530181	6.89279	0.565771	6.87007e+08
1890	-99	28.69	890.433	2594	26.1848	27.4941	0.084629	240	0	0	0	14.8415	Electricity Generation	1.85531e+10	W A PARISH	TX	0.0556796	39.1895	9.4793	5.19658	2.97927	18.5666	30.8748	1164.85	81.404	168.931	-391.824	26.9379	58.6175	77.072	35.5831	46.7903	196.171	228.573	19.2206	2.15857	3.49219	3.9219	9.67848e+08	19.8592	0.237489	0.271601	19.642	2.2059	3.84186	0.431459	27.4543	3.08325	5.19837e+08
1434	-99.1	29.31	1011.13	2829	24.9401	26.1871	0.0914064	142	0	8	0	33.5848	Electricity Generation	2.02522e+10	W A PARISH	TX	0.0613835	4.10697	9.53677	5.19817	2.97717	18.5682	30.8727	1157.59	80.8467	169.358	-391.385	27.3642	58.0978	76.4903	35.356	46.5328	196.597	228.999	20.9714	2.07406	1.56144	1.54426	1.04536e+09	20.0614	0.234723	0.268437	21.427	2.11913	1.62632	0.160843	4.29894	0.425164	5.6145e+08
1368	-97	29.44	771.781	2573.05	25.1595	26.4174	0.0704673	131	7.9	7.1	23.9	12.7127	Stationary Combustion	1.36089e+10	MBI NGLP MONT BELVIEU PLANT	TX	0.0551712	0.860538	9.55948	5.20245	2.99466	18.5725	30.8902	958.688	70.3229	146.916	-413.831	4.92215	49.0562	65.6431	31.822	41.7714	174.155	206.557	14.1679	1.83574	0.825944	1.07018	8.05889e+08	17.5805	0.213775	0.244481	14.5192	1.88125	0.851288	0.110302	1.28303	0.166243	4.32861e+08
834	-95.8	30.69	1088.69	5639	24.4748	25.6986	0.0961153	19	0	0	0	19.0667	Electricity Generation	1.75186e+10	S O PURDOM	FL	0.129587	0.792624	9.58615	5.21229	2.98898	18.5823	30.8845	1143.67	79.772	167.295	-393.433	25.3012	57.1511	75.9049	35.0044	46.2729	194.534	226.936	18.2561	1.67688	2.42139	2.22413	1.09921e+09	16.6084	0.22615	0.258633	18.735	1.72087	2.49092	0.2288	3.03315	0.278605	5.90213e+08
384	-113.4	32.94	945.407	2490.39	26.0821	27.3862	0.0892033	125	0	7.8	0	50.861	Electricity Generation	2.55078e+10	Hugo	OK	0.0531648	100	9.53812	5.21836	2.99852	18.5884	30.8941	1166.08	81.5808	170.705	-390.03	28.7109	58.6659	77.3349	33.1327	46.9021	197.944	230.346	26.2063	2.77197	7.90751	8.36414	1.02016e+09	25.6884	0.242574	0.277416	26.6515	2.81905	8.80817	0.931681	72.3136	7.64894	5.47907e+08
2907	-99.4	27.31	938.411	13815.4	27.9433	29.3405	0.0933429	157	2.9	8.3	28.6	23.0047	Stationary Combustion	2.29779e+10	J K SPRUCE	TX	0.328043	10.3795	9.54713	5.22704	3.00514	18.597	30.9007	1236.47	87.0166	172.529	-388.241	30.535	63.5522	81.4385	37.0161	48.7098	199.768	232.17	24.2622	2.58545	8.66657	9.23537	1.0675e+09	22.728	0.267072	0.305433	24.7901	2.64172	8.93378	0.952012	15.8206	1.6859	5.72453e+08
1382	-98.1	29.44	1026.7	8249	25.1457	26.403	0.0927961	79	4.3	7.1	26.7	15.5239	Electricity Generation	1.94866e+10	HAYS ENERGY PROJECT	TX	0.192937	1.09669	9.5772	5.24748	3.02581	18.6175	30.9213	1163.26	81.2471	170.275	-390.469	28.2817	58.5071	76.4328	35.393	46.5077	197.515	229.917	20.3503	1.98211	4.00064	3.89661	1.06125e+09	19.1758	0.235227	0.269014	20.7919	2.02512	4.09579	0.398929	4.81981	0.469448	5.69596e+08
1136	-96.8	29.94	1021.57	2654	24.7272	25.9636	0.0915525	65	0	7.1	23	9.2516	Stationary Combustion	1.81937e+10	WATERFORD 1 & 2	LA	0.0571359	2.20409	9.57557	5.25884	3.03776	18.6288	30.9333	1144.27	79.8105	167.352	-393.385	25.3584	57.2026	75.5447	35.0545	46.1165	194.591	226.993	18.9194	1.85199	1.22834	1.2024	1.04703e+09	18.0696	0.227817	0.26054	19.3762	1.89671	1.27429	0.124738	2.71096	0.265372	5.62373e+08
799	-97	30.81	1107.86	3595	24.488	25.7124	0.097946	30	3.6	6.7	24.5	23.1303	Stationary Combustion	2.02576e+10	PUTNAM	FL	0.0799757	2.27079	9.61569	5.25888	3.03471	18.6289	30.9302	1145.06	79.9352	167.547	-393.174	25.5531	57.2431	75.4451	35.0106	46.0698	194.786	227.188	21.0246	1.89777	1.84388	1.66436	1.12015e+09	18.7695	0.228749	0.261606	21.5139	1.94193	1.90487	0.171941	3.48819	0.314858	6.01573e+08
1624	-81.9	28.19	746.241	2840	28.1697	29.5782	0.0768124	1996	0	7.4	26.1	14.9968	Electricity Generation	1.17061e+10	SIM GIDEON	TX	0.0616505	0.850795	9.63237	5.26772	3.05532	18.6377	30.9509	1279.64	90.4855	188.228	-372.567	46.2342	66.5391	84.1465	38.3886	49.9031	215.467	247.869	12.3145	1.6502	0.806917	1.08131	8.78454e+08	14.0183	0.282074	0.322591	12.6952	1.70122	0.83682	0.112138	1.30211	0.17449	4.71844e+08
79	-115.1	33.56	1143.28	2330	24.9209	26.1669	0.103048	240	0	0	0	28.5684	Electricity Generation	3.20152e+10	JEFFERIES	SC	0.0492718	100	9.66779	5.27887	3.05244	18.6489	30.948	1189.24	83.5691	174.419	-386.31	32.4251	60.2866	79.1949	36.1681	47.7174	201.658	234.06	32.822	2.87085	9.14252	7.99673	1.1785e+09	27.8506	0.254897	0.29151	33.3366	2.91587	10.181	0.890506	83.5431	7.3073	6.32947e+08
2817	-99.3	27.69	846.731	2683.27	27.6518	29.0344	0.0850503	1235	0	8.05	33.3	21.8326	Stationary Combustion	1.97332e+10	J K SPRUCE	TX	0.0578464	10.3795	9.52788	5.28116	3.06361	18.6512	30.9592	1284.42	91.1762	172.375	-388.393	30.3817	66.8622	86.3133	37.907	50.8496	199.615	232.017	20.4007	2.40934	1.82477	2.15508	9.72666e+08	20.974	0.290406	0.332119	20.8235	2.45928	1.93604	0.228649	8.2209	0.970898	5.22412e+08
192	-113.3	33.06	1151.89	4288.33	25.5505	26.828	0.106015	640	0	8	25.5	36.6463	Electricity Generation	3.09293e+10	LAKE CATHERINE	AR	0.0968042	100	9.68138	5.29113	3.0635	18.6611	30.959	1251.55	88.6715	184.162	-376.568	42.1688	64.5789	83.5351	37.5961	49.6233	211.402	243.804	31.7296	2.75457	10.8135	9.38761	1.21242e+09	26.1704	0.280406	0.320682	32.258	2.80044	11.9044	1.03347	87.3567	7.58376	6.50981e+08
374	-113.3	32.69	944.33	2030	25.8803	27.1743	0.0885571	240	0	0	0	50.9162	Electricity Generation	2.4312e+10	Hugo	OK	0.0419903	100	9.57546	5.29909	3.07958	18.6691	30.9751	1178.77	82.6231	172.684	-388.052	30.6907	59.5416	78.0585	35.8563	47.22	199.924	232.326	25.0123	2.64868	7.51733	7.96049	1.01277e+09	24.6969	0.247622	0.283189	25.4543	2.69549	8.4071	0.890272	71.4573	7.56699	5.4398e+08
1103	-97.5	30.06	1005.98	5010	24.782	26.0211	0.0899768	36	0	7.3	21	7.48489	Electricity Generation	1.9197e+10	SANFORD	FL	0.11432	3.99788	9.5989	5.30224	3.08199	18.6722	30.9775	1148.44	80.1446	168.014	-392.722	26.0206	57.492	75.7889	35.0585	46.2235	195.254	227.655	19.8847	1.97665	2.53591	2.52084	1.02901e+09	19.3241	0.230028	0.263068	20.3327	2.02118	2.62243	0.260684	5.18269	0.515188	5.52524e+08
3028	-97.8	26.44	644.211	2236	28.9214	30.3675	0.0679534	29	0	8	0	41.7151	Stationary Combustion	1.25335e+10	VANDOLAH POWER PROJECT	FL	0.0469903	6.29155	9.59641	5.30513	3.09936	18.6751	30.9949	1133.08	78.5664	176.315	-384.477	34.3216	56.3979	74.2499	34.6488	45.5578	203.555	235.956	13.0727	2.02926	0.926505	1.4382	7.7714e+08	16.8216	0.22008	0.251692	13.4098	2.08159	0.984422	0.15281	4.02848	0.625336	4.17438e+08
1094	-91	29.94	682.491	2035.74	25.7038	26.9891	0.0638602	533	0	0	24	4.58952	Stationary Combustion	8.26128e+09	EUNICE NATURAL GAS PROCESSING PLANT	LA	0.0421295	0.292218	9.54912	5.31091	3.10868	18.6809	31.0042	969.732	71.1687	148.647	-412.104	6.65293	49.8266	66.874	32.126	42.3124	175.886	208.288	8.77513	1.28575	0.38332	0.561649	7.30328e+08	12.0153	0.214493	0.245302	9.09351	1.3324	0.39857	0.0583994	0.531447	0.0778688	3.92318e+08
1845	-95.8	28.81	535.99	2760	29.8828	31.3769	0.0581921	785	0	7.8	0	9.01538	Stationary Combustion	8.63786e+09	LUBRIZOL DEER PARK PLANT	TX	0.0597087	0.652484	9.54496	5.31207	3.11542	18.6821	31.011	1023.32	74.5314	198.435	-362.334	56.4411	52.7683	68.2222	33.1884	42.9075	225.674	258.076	9.10131	1.69804	0.571156	1.06561	6.65506e+08	13.6758	0.227101	0.259721	9.39065	1.75202	0.592168	0.110481	0.862508	0.160919	3.57468e+08
493	-111.9	32.19	1162.01	3540	24.1091	25.3146	0.101356	240	0	0	0	68.6505	Electricity Generation	3.09283e+10	UNION POWER STATION	AR	0.0786408	100	9.66605	5.31551	3.08982	18.6855	30.9854	1194.64	83.879	175.104	-385.639	33.1108	60.6194	68.7466	36.4507	43.1332	202.344	234.746	31.7011	2.72812	9.89473	8.51519	1.15914e+09	27.3487	0.256136	0.292927	32.2059	2.77157	10.9293	0.940554	83.073	7.14908	6.22435e+08
1659	-99	29.06	922.241	2132	25.4272	26.6986	0.0851215	125	0	7.4	0	15.6732	Electricity Generation	1.82619e+10	W A PARISH	TX	0.044466	39.1895	9.55962	5.31755	3.09996	18.6876	30.9955	1151.29	80.3338	168.38	-392.367	26.3862	57.6804	76.2095	35.2606	46.4102	195.619	228.021	18.9387	2.05355	3.27821	3.55462	9.73481e+08	19.4546	0.231631	0.264901	19.3631	2.09957	3.62536	0.393103	27.3767	2.96849	5.22894e+08
62	-114.8	33.94	1232.5	2220	24.2647	25.4779	0.108072	240	0	0	0	28.8242	Electricity Generation	3.32102e+10	JEFFERIES	SC	0.0466019	100	9.71402	5.32661	3.09814	18.6966	30.9937	1189.06	83.6147	174.461	-386.255	32.4674	60.2738	79.1279	36.1576	47.6859	201.7	234.102	34.0597	2.76347	9.47946	7.69125	1.23596e+09	27.5574	0.255023	0.291653	34.6003	2.80733	10.5673	0.857392	87.5077	7.10002	6.6382e+08
359	-111.3	32.81	1118.91	2965.71	24.731	25.9676	0.100024	2000	0	0	72	16.2016	Stationary Combustion	2.67804e+10	MID-GEORGIA COGENERATION	GA	0.0647017	100	9.6789	5.32867	3.10356	18.6987	30.9991	1147.11	80.1064	167.86	-392.865	25.8659	57.3919	75.8048	35.0913	46.2284	195.099	227.501	27.5602	2.46312	9.08764	8.12186	1.14391e+09	24.093	0.233699	0.267266	28.0597	2.50777	10.1029	0.902924	81.308	7.26671	6.14338e+08
165	-112.6	33.44	1265.17	3240	23.9041	25.0993	0.109085	436	8.5	7.7	24	18.8326	Electricity Generation	3.10706e+10	Comanche (8059)	OK	0.0713592	100	9.72492	5.32921	3.10035	18.6992	30.9959	1215.72	85.8241	178.673	-382.042	36.6793	62.1244	81.0311	37.0417	48.5211	205.912	238.314	31.9146	2.52256	10.2436	8.0966	1.24754e+09	25.5821	0.265224	0.30332	32.4599	2.56565	11.3539	0.897423	89.005	7.03502	6.69952e+08
1935	-99.3	28.56	782.931	2430	26.3974	27.7173	0.0750318	252	0	7.9	27.8	27.4575	Electricity Generation	1.70328e+10	W A PARISH	TX	0.051699	13.6732	9.65705	5.33584	3.12466	18.7058	31.0202	1167.99	81.6444	172.927	-387.83	30.9332	58.8212	77.2683	35.6234	46.8767	200.166	232.568	17.6252	2.25118	1.66041	2.12076	8.58091e+08	20.54	0.239273	0.273641	17.9988	2.2989	1.78064	0.227433	9.08485	1.16036	4.60892e+08
265	-113.3	32.81	987.841	3833.68	25.2433	26.5055	0.0900521	86	0	0	24.5	47.3449	Electricity Generation	2.56461e+10	Hugo	OK	0.085769	100	9.63223	5.36197	3.14168	18.732	31.0372	1165.01	81.4732	170.53	-390.207	28.5367	58.5957	76.9802	35.4576	46.7468	197.77	230.172	26.3329	2.6657	8.83479	8.94353	1.02987e+09	25.5692	0.241752	0.276476	26.7816	2.71113	9.75709	0.987719	73.8537	7.47628	5.53008e+08
3004	-98.9	26.44	618.533	2152.84	28.7639	30.2021	0.0648099	171	8.7	7.7	26.2	44.6961	Electricity Generation	1.47401e+10	MANATEE	FL	0.0449719	100	9.57471	5.37387	3.17079	18.7439	31.0663	1155.52	80.452	178.758	-382.027	36.7646	57.9438	76.2001	35.3124	46.4128	205.998	238.399	15.2521	2.46585	5.41879	8.76071	7.4119e+08	20.5779	0.232862	0.26631	15.5738	2.51787	6.07097	0.98151	52.2149	8.44172	3.98117e+08
1629	-96.3	29.19	770.751	2819	25.7926	27.0822	0.0722195	207	1.4	7.2	22.2	11.0667	Petroleum and Natural Gas Systems	1.22914e+10	CHISOLM PLANT	TX	0.0611408	1.05047	9.6604	5.37507	3.16594	18.7451	31.0615	960.028	70.3865	147.089	-413.665	5.09585	49.1504	65.6648	31.8493	41.7824	174.329	206.731	12.8645	1.66908	0.841945	1.09237	8.25928e+08	15.5758	0.212631	0.243172	13.2241	1.71574	0.871394	0.113058	1.41153	0.183137	4.43623e+08
1853	-80.5	27.69	800.021	5170	31.727	33.3133	0.0924752	2000	0	6	0	10.4748	Electricity Generation	1.52914e+10	HOUMA	LA	0.118204	0.500485	9.63406	5.37952	3.15798	18.7495	31.0535	1301.14	92.1707	182.061	-378.751	40.0679	68.0277	87.4178	38.8026	51.3424	209.301	241.703	16.0025	2.00026	1.92536	2.40664	1.05758e+09	15.1313	0.291101	0.332913	16.4591	2.05733	1.98387	0.247977	2.31331	0.289156	5.67909e+08
1737	-98	28.94	914.401	2010	25.8773	27.1711	0.0859701	186	0	0	0	11.6381	Petroleum and Natural Gas Systems	1.78066e+10	KATY COMPRESSOR STATION	TX	0.0415049	2.19333	9.61346	5.38815	3.17007	18.7581	31.0656	964.874	70.8065	147.852	-412.903	5.85799	49.4842	67.6763	31.9861	42.6653	175.091	207.493	18.4914	2.02224	0.905183	0.98992	9.83185e+08	18.8076	0.217209	0.248408	18.9198	2.06909	0.941521	0.102966	2.2841	0.249792	5.28118e+08
1449	-99.3	29.44	1141.71	2829	24.2652	25.4784	0.100409	1009	0	7.6	0	44.4692	Electricity Generation	2.28496e+10	W A PARISH	TX	0.0613835	4.10697	9.7215	5.39412	3.16883	18.7641	31.0644	1260.89	89.35	185.555	-375.186	43.5611	65.2155	84.6777	38.0484	50.1266	212.794	245.196	23.6389	2.07049	1.75218	1.53471	1.14831e+09	20.5858	0.280619	0.320927	24.1396	2.11434	1.82346	0.159714	4.75927	0.416856	6.16741e+08
1252	-103.1	29.69	1172.04	2628.16	24.3797	25.5987	0.103397	200	0.8	8	34.6	82.6752	Stationary Combustion	3.02457e+10	ONSHORE TREATING FACILITY	AL	0.0565088	100	9.73693	5.39547	3.1689	18.7655	31.0644	992.075	73.0829	152.097	-408.634	10.1036	51.29	67.9528	32.6397	42.7827	179.337	211.738	31.0523	2.64943	9.3055	7.9396	1.18248e+09	26.2602	0.234896	0.268635	31.5684	2.69347	10.3509	0.88316	83.9588	7.16351	6.35068e+08
2754	-99.3	28.81	4703.35	35305	26.1181	27.424	0.420641	210	0	0	0	23.0457	Electricity Generation	9.89746e+10	W A PARISH	TX	0.849636	39.1895	9.61766	5.40337	3.1357	18.7734	31.0312	1443.28	103.824	167.663	-393.088	25.6698	77.8249	95.168	41.3892	54.7339	194.903	227.305	110.865	2.35715	106.233	22.5867	4.8106e+09	23.046	0.352865	0.403549	113.404	2.41114	109.949	2.33767	226.771	4.82147	2.57188e+09
1633	-82	28.19	605.291	2840	28.1713	29.5798	0.0623201	240	0	0	0	12.7365	Stationary Combustion	9.42658e+09	LITTLE GYPSY	LA	0.0616505	0.850795	9.57302	5.4192	3.21841	18.7892	31.1139	1144.27	79.4781	166.996	-393.8	25.0021	57.1995	75.5028	34.9878	46.1086	194.235	226.637	9.92021	1.63892	0.650306	1.07437	7.12715e+08	13.9189	0.223179	0.255236	10.2291	1.68995	0.674566	0.111445	1.05207	0.173813	3.82821e+08
1102	-97.6	30.06	1445.1	7893	24.6821	25.9162	0.128084	66	0	7.5	0	11.047	Pulp and Paper Manufacturing	2.78917e+10	INTERNATIONAL PAPER - ORANGE MILL	TX	0.184296	3.99788	9.7123	5.42409	3.1888	18.7941	31.0843	1175.19	81.9097	171.646	-389.09	29.6519	59.0341	76.4613	35.3482	46.5186	198.885	231.287	29.0613	2.01102	5.72983	3.965	1.46481e+09	19.8396	0.236843	0.270862	29.6715	2.05325	5.89236	0.407747	9.5355	0.65985	7.86217e+08
1562	-98.3	29.19	1154.07	4220	25.2558	26.5187	0.105453	2000	0	6.7	36	7.50639	Electricity Generation	2.23345e+10	CLEAR LAKE COGENERATION	TX	0.0951456	2.1097	9.75129	5.42611	3.19869	18.7961	31.0942	1361.06	97.5632	201.307	-359.439	59.3129	72.1659	84.827	40.3779	50.193	228.546	260.948	23.1493	2.00588	2.36503	2.04929	1.206e+09	19.1951	0.32319	0.369612	23.6743	2.05137	2.43682	0.21115	4.02043	0.34837	6.47628e+08
1966	-98.9	28.56	806.841	2594	26.4238	27.745	0.0774135	1000	0	7.24	29	29.0647	Electricity Generation	1.68792e+10	W A PARISH	TX	0.0556796	13.6732	9.75797	5.44896	3.23615	18.819	31.1317	1249.03	88.2882	155.337	-405.421	13.3438	64.4128	83.7601	37.703	49.727	182.577	214.979	17.4897	2.16767	1.7468	2.16499	8.85328e+08	19.755	0.274202	0.313588	17.875	2.21543	1.87237	0.232061	9.40833	1.16607	4.75516e+08
2951	-99.4	27.31	886.711	13815.4	27.9433	29.3405	0.0882003	143	0	7.4	0	24.1818	Stationary Combustion	2.17119e+10	J K SPRUCE	TX	0.328043	10.3795	9.62582	5.44955	3.23031	18.8195	31.1259	1234.63	86.8631	168.566	-392.204	26.572	63.4236	82.299	36.8671	49.0876	195.805	228.207	22.9255	2.58545	8.1891	9.23537	1.00869e+09	22.728	0.266252	0.304495	23.4244	2.64172	8.44159	0.952012	14.949	1.6859	5.40915e+08
378	-113.5	32.81	864.447	3427.25	26.3912	27.7108	0.0824075	125	0	0	23.5	53.9607	Electricity Generation	2.28276e+10	Hugo	OK	0.0759041	100	9.6208	5.46248	3.2465	18.8325	31.142	1166.73	81.6083	170.789	-389.948	28.7952	58.708	77.687	35.535	47.057	198.028	230.43	23.4626	2.71418	7.79888	9.02182	9.42442e+08	24.8955	0.241942	0.276693	23.8734	2.7617	8.63936	0.999409	67.2991	7.78522	5.06099e+08
1433	-100	29.31	1058.29	3292	24.1911	25.4006	0.0927179	240	0	0	0	86.7032	Electricity Generation	2.30995e+10	W A PARISH	TX	0.0726214	4.52504	9.70979	5.46642	3.24476	18.8364	31.1403	1180.25	82.6549	172.814	-387.928	30.8205	59.6076	77.961	35.8364	47.1783	200.054	232.455	23.8195	2.25075	2.03619	1.92404	1.06036e+09	22.4637	0.246098	0.281446	24.2815	2.29441	2.11097	0.199469	5.09761	0.481684	5.69452e+08
993	-96.1	30.31	1170.23	2565	24.6979	25.9327	0.104736	2000	0	6	0	17.1623	Pulp and Paper Manufacturing	1.93643e+10	GEORGIA-PACIFIC PORT HUDSON OPERATIONS	LA	0.0549757	1.59298	9.78527	5.47591	3.24878	18.8459	31.1443	1148.54	79.794	167.465	-393.268	25.4718	57.1884	74.9899	34.8967	45.8723	194.705	227.107	20.1977	1.72595	1.23222	1.05297	1.1978e+09	16.8623	0.224493	0.256738	20.7206	1.77064	1.27738	0.109156	2.46527	0.210665	6.4337e+08
1980	-82.4	27.69	517.427	4474.33	29.0586	30.5115	0.0549119	779	0	0	25.5	7.58418	Cement Production	8.20637e+09	ALAMO SAN ANTONIO CEMENT PLANT	TX	0.101319	0.526669	9.59246	5.4896	3.29659	18.8596	31.1921	1088.3	77.8169	169.885	-390.919	27.8914	55.7491	78.4073	35.9905	47.3852	197.124	229.526	8.6342	1.66868	0.895925	1.7315	6.27992e+08	13.7489	0.233016	0.266485	8.90575	1.72116	0.926281	0.179017	1.13216	0.218805	3.3726e+08
2132	-82.1	27.56	833.293	4474.33	28.7796	30.2185	0.087623	240	0	0	0	7.63044	Electricity Generation	1.31474e+10	CHARLES LARSEN MEMORIAL POWER PLANT	FL	0.101319	0.43467	9.67251	5.50645	3.28746	18.8765	31.183	1145.53	79.5199	171.64	-389.166	29.6467	57.2915	75.3636	35.0415	46.0495	198.88	231.282	13.8297	1.65964	1.42902	1.7149	1.00209e+09	13.8009	0.223135	0.255186	14.2629	1.71162	1.47665	0.177206	1.74778	0.209744	5.38166e+08
2190	-80.6	27.19	494.17	2630	30.1508	31.6583	0.0545973	240	0	0	0	23.1155	Stationary Combustion	7.51401e+09	GUADALUPE GENERATING STATION	TX	0.0565534	0.725088	9.59872	5.50844	3.31579	18.8784	31.2113	1138.53	78.8729	151.55	-409.268	9.55655	56.7927	74.8276	34.8188	45.8162	178.79	211.191	7.9473	1.60821	0.478357	0.967999	6.24395e+08	12.728	0.218994	0.250449	8.21728	1.66284	0.497521	0.100678	0.779391	0.157717	3.35393e+08
2767	-99.8	28.94	1055.4	3599.47	25.724	27.0103	0.0982818	1860	0	7.92	0	48.1977	Electricity Generation	2.30867e+10	W A PARISH	TX	0.0800841	9.53079	9.75922	5.51625	3.29192	18.8862	31.1875	1369.81	98.2723	170.179	-390.569	28.1856	72.7294	92.4793	40.6331	53.553	197.419	229.82	23.8483	2.25964	2.59392	2.45775	1.12399e+09	21.2176	0.328455	0.375633	24.3376	2.306	2.72512	0.258206	9.39303	0.889995	6.03611e+08
764	-96.4	30.81	1010.43	2039	24.3166	25.5325	0.0889684	54	0	5.3	23	11.788	Stationary Combustion	1.7564e+10	Permian Basin	TX	0.0422087	1.80502	9.71278	5.51954	3.29981	18.8895	31.1953	1142.77	79.7581	167.194	-393.529	25.2001	57.0967	75.5986	35.0209	46.1377	194.433	226.835	18.276	1.80873	0.888679	0.879503	1.01747e+09	17.9621	0.227538	0.26022	18.7208	1.85275	0.923263	0.091373	2.06669	0.204535	5.46539e+08
1885	-98.6	28.81	765.137	2828	26.0521	27.3547	0.0723362	160	0	7.5	0	13.7114	Electricity Generation	1.53273e+10	BAYSIDE POWER STATION	FL	0.0613592	11.0304	9.747	5.52103	3.31182	18.891	31.2074	1155.09	80.6002	181.529	-379.226	39.5352	57.945	76.326	35.3668	46.4627	208.768	241.17	15.8968	2.07764	1.55809	2.03636	8.27263e+08	19.2161	0.232705	0.26613	16.2569	2.1247	1.65866	0.216779	7.3392	0.959201	4.44319e+08
1655	-98.9	29.06	865.294	2660	25.4175	26.6884	0.0797938	70	0	6.63	24	19.577	Electricity Generation	1.69882e+10	W A PARISH	TX	0.0572816	39.1895	9.64491	5.52999	3.31563	18.9	31.2112	1146.34	79.9098	167.587	-393.162	25.5932	57.3353	75.6238	35.0869	46.1533	194.826	227.228	17.6182	2.03609	3.29281	3.80542	9.12551e+08	19.3065	0.229177	0.262095	18.0158	2.08204	3.62315	0.418719	25.8865	2.99164	4.90136e+08
1011	-93	30.19	977.381	17749	25.4416	26.7137	0.0888811	2000	0	7.4	0	15.2	Stationary Combustion	1.24504e+10	CABOT CORP - VILLE PLATTE PLANT	LA	0.423519	0.373328	9.67559	5.5381	3.31849	18.9081	31.214	1174.53	86.6394	179.387	-381.354	37.3936	63.1976	89.4856	39.4969	52.2374	206.627	239.028	13.4174	1.37279	5.70675	5.83882	1.01648e+09	13.1999	0.291008	0.332807	13.9536	1.42765	5.93707	0.607447	6.17297	0.631583	5.45157e+08
1549	-80.9	28.19	486.62	6217.17	30.9609	32.5089	0.054742	240	0	0	0	18.9034	Electricity Generation	9.10539e+09	COTTONWOOD ENERGY PROJECT	TX	0.143621	0.605994	9.62204	5.54482	3.35203	18.9148	31.2476	1152.41	80.0915	168.231	-392.569	26.2375	57.7547	75.7914	35.213	46.2361	195.471	227.872	9.52165	1.95669	1.39173	2.85999	6.26049e+08	15.2091	0.226465	0.258993	9.79203	2.01225	1.43382	0.294648	1.66992	0.343166	3.36143e+08
2920	-99.5	27.31	752.241	12162.1	27.9104	29.3059	0.0750547	157	2.2	8.2	27.1	20.2974	Stationary Combustion	1.803e+10	J K SPRUCE	TX	0.287915	10.3795	9.75282	5.54575	3.33463	18.9158	31.2302	1213.64	85.1564	210.051	-350.719	68.0577	61.9792	80.649	36.3888	48.3633	237.291	269.693	18.938	2.51754	6.02143	8.00466	8.58353e+08	22.0632	0.257141	0.294076	19.3608	2.57375	6.21896	0.826725	11.7583	1.5631	4.6044e+08
183	-112.8	33.31	957.711	2910.6	25.6804	26.9645	0.0888296	590	0	0	32	2.49391	Electricity Generation	2.47821e+10	Comanche (8059)	OK	0.063364	100	9.72173	5.54714	3.32749	18.9171	31.223	1231.1	87.0527	181.044	-379.683	39.0501	63.2023	82.1857	37.5283	49.0302	208.283	240.685	25.4738	2.65986	8.10108	8.4588	1.01589e+09	25.0754	0.271319	0.31029	25.9173	2.70617	9.0021	0.93996	72.2379	7.54277	5.45581e+08
1807	-98.5	28.81	854.101	2104	26.1851	27.4944	0.0812364	700	0	8.1	0	23.2378	Electricity Generation	1.72349e+10	BAYSIDE POWER STATION	FL	0.0437864	11.0304	9.65664	5.55728	3.34201	18.9273	31.2375	1211.57	85.2331	197.866	-362.89	55.872	61.8335	81.5201	36.7735	48.743	225.105	257.507	17.8807	2.09352	1.43731	1.68283	9.29049e+08	19.2463	0.257586	0.294585	18.2854	2.1409	1.54321	0.180682	7.92324	0.92767	4.99031e+08
1319	-98.1	29.69	988.01	2250	24.5917	25.8214	0.0881191	515	0	7.7	24	2.02555	Electricity Generation	1.84895e+10	CANE ISLAND	FL	0.0473301	1.14286	9.72122	5.55848	3.33921	18.9285	31.2347	1192.73	83.7974	174.957	-385.781	32.9632	60.5541	79.5296	36.2669	47.8662	202.196	234.598	19.1902	1.94231	0.981817	0.993732	1.00776e+09	19.0424	0.249899	0.285794	19.6299	1.98682	1.01254	0.102483	1.72957	0.175056	5.41303e+08
1604	-99.5	29.19	847.475	2030	25.0717	26.3253	0.0771095	220	0.7	7.3	27.7	41.4816	Electricity Generation	1.84944e+10	W A PARISH	TX	0.0419903	4.52504	9.83118	5.57235	3.35974	18.9423	31.2553	1168.93	81.7695	171.106	-389.64	29.1121	58.8725	77.6301	35.642	47.0336	198.345	230.747	19.1063	2.2545	1.05709	1.24734	8.81852e+08	21.6661	0.240907	0.27551	19.4909	2.29987	1.10757	0.130691	3.59188	0.423833	4.73673e+08
1375	-97.1	29.44	711.661	2573.05	25.1585	26.4164	0.0649622	131	7.9	7.1	23.9	12.8123	Stationary Combustion	1.27662e+10	MBI NGLP MONT BELVIEU PLANT	TX	0.0551712	0.860538	9.70191	5.58128	3.37806	18.9513	31.2736	959.346	70.383	147.025	-413.721	5.03112	49.1015	65.6818	31.8392	41.7882	174.264	206.666	13.2812	1.86623	0.773565	1.08699	7.42931e+08	17.8768	0.214312	0.245095	13.6051	1.91174	0.796932	0.111982	1.19494	0.167909	3.99043e+08
1491	-97.8	29.31	889.051	2132.18	25.3023	26.5674	0.081673	164	3.3	6.4	23.8	4.86278	Petrochemical Production	1.67519e+10	OXY VINYLS LP - DEER PARK VCM FACILITY	TX	0.0444703	0.97372	9.68769	5.59153	3.37599	18.9615	31.2715	1122.66	78.9264	165.314	-395.434	23.3206	56.4682	76.4217	33.5823	46.5035	192.554	224.955	17.4021	1.95738	0.831953	0.935777	9.34043e+08	18.631	0.229487	0.26245	17.8093	2.00318	0.857888	0.0964948	1.42412	0.160184	5.01715e+08
1719	-99.1	28.94	775.585	4102	25.9017	27.1967	0.0727165	255	0	6.47	25.5	8.89612	Electricity Generation	1.57357e+10	W A PARISH	TX	0.0922816	39.1895	9.79521	5.59548	3.38599	18.9655	31.2815	1169.69	81.8183	171.255	-389.496	29.2612	58.9574	78.4554	35.6029	47.3969	198.494	230.896	16.2974	2.10131	3.58502	4.62234	8.31612e+08	19.5974	0.239268	0.273635	16.6592	2.14795	3.89826	0.502621	24.1832	3.11806	4.46582e+08
2877	-80.5	26.31	456.6	3570	30.7295	32.266	0.0514232	173.8	0	0	0	21.7845	Electricity Generation	6.79688e+09	P L BARTOW POWER PLANT	FL	0.0793689	0.645969	9.60353	5.59808	3.40933	18.9681	31.3049	1133.26	78.4017	172.333	-388.493	30.3389	56.4305	74.5713	34.6788	45.7049	199.572	231.974	7.20182	1.57727	0.595859	1.30499	5.88094e+08	12.246	0.216039	0.24707	7.45571	1.63287	0.619277	0.135628	0.855772	0.187423	3.15869e+08
2997	-97.6	26.56	616.211	3282.59	29.1147	30.5705	0.0653336	1340	0	8.1	0	50.4467	Electricity Generation	1.17912e+10	J T DEELY	TX	0.0723929	6.29155	9.71493	5.61264	3.4091	18.9826	31.3046	1255.47	88.5601	181.045	-379.746	39.0514	64.8354	83.7765	37.6401	49.7399	208.284	240.686	12.3038	1.99668	1.19088	1.93259	7.47179e+08	16.467	0.273068	0.31229	12.6276	2.04924	1.25475	0.203623	4.18113	0.678523	4.013e+08
1869	-98.4	28.69	848.441	3845	26.384	27.7032	0.0811265	956	0	8.3	29.6	3.9655	Electricity Generation	1.7162e+10	BAYSIDE POWER STATION	FL	0.0860437	11.0304	9.69128	5.62698	3.41179	18.997	31.3073	1243.35	87.8384	216.385	-344.373	74.3914	64.0457	82.9723	37.4488	49.381	243.624	276.026	17.7914	2.09695	2.18433	2.57452	9.27792e+08	19.1761	0.271168	0.310118	18.1948	2.1445	2.30694	0.271904	8.67699	1.0227	4.98251e+08
1788	-99.5	28.81	749.412	2275	25.9027	27.1979	0.0704428	72	0	7.3	23	34.2597	Electricity Generation	1.61749e+10	W A PARISH	TX	0.0479369	9.53079	9.80876	5.63365	3.42588	19.0037	31.3214	1148.35	80.0548	166.691	-394.059	24.6972	57.4592	76.0081	35.1587	46.3223	193.93	226.332	16.7325	2.23275	1.29239	1.72454	8.05609e+08	20.77	0.230993	0.264172	17.0835	2.27959	1.37527	0.183513	6.1553	0.821351	4.32711e+08
1706	-98.9	28.94	1018.93	6718	25.8318	27.1233	0.0949096	2000	0	8.35	0	19.3342	Electricity Generation	2.01721e+10	W A PARISH	TX	0.155777	39.1895	9.80345	5.63959	3.41687	19.0096	31.3124	1375.12	98.6344	203.448	-357.305	61.454	73.1244	93.073	40.6137	53.8143	230.687	263.089	21.004	2.06137	5.98814	5.87688	1.08542e+09	19.351	0.328526	0.375715	21.4638	2.1065	6.42401	0.630466	32.8912	3.22801	5.82685e+08
116	-112.6	33.69	1067.08	4720	24.4737	25.6974	0.0938972	240	0	0	0	31.2488	Electricity Generation	2.67198e+10	Blythe Energy	CA	0.107282	100	9.82497	5.64092	3.41868	19.0109	31.3142	1191.5	83.771	174.837	-385.88	32.8435	60.4404	79.442	36.3447	47.8239	202.077	234.478	27.5695	2.58364	9.81473	9.19777	1.07384e+09	25.6737	0.25388	0.290347	28.0291	2.62672	10.7845	1.01066	77.6089	7.27303	5.76542e+08
1519	-99.3	29.19	871.711	2478	25.2024	26.4625	0.0796982	150	0	7.39	23.1	31.5845	Electricity Generation	1.79499e+10	W A PARISH	TX	0.0528641	4.10697	9.71146	5.64742	3.43312	19.0174	31.3287	1157.94	80.8623	169.394	-391.353	27.4001	58.124	76.4775	32.568	46.5278	196.633	229.035	18.5795	2.13138	1.22122	1.40094	9.11458e+08	20.3843	0.235069	0.268833	18.9767	2.17695	1.27441	0.146197	3.60479	0.41353	4.89554e+08
2575	-99.3	27.69	694.421	2683.27	27.6518	29.0344	0.0697514	1001	6.1	9.1	24	21.4717	Stationary Combustion	1.61836e+10	J K SPRUCE	TX	0.0578464	10.3795	9.79869	5.65235	3.44512	19.0224	31.3407	1256.69	88.8938	204.041	-356.728	62.047	64.949	83.9536	37.795	49.8137	231.28	263.682	16.731	2.40934	1.49653	2.15508	7.97703e+08	20.974	0.278205	0.318166	17.0777	2.45928	1.58779	0.228649	6.74212	0.970898	4.28441e+08
1945	-81.6	27.69	540.01	6280	28.7218	30.1578	0.0565505	240	0	0	0	16.742	Stationary Combustion	8.50927e+09	BAYTOWN ENERGY CENTER	TX	0.145146	0.850795	9.69407	5.65451	3.45965	19.0245	31.3552	1149.36	79.8104	169.807	-391	27.8134	57.5463	75.6823	35.1402	46.1894	197.046	229.448	8.94139	1.65578	1.33294	2.46836	6.46732e+08	13.8255	0.22446	0.256701	9.22053	1.70747	1.37818	0.255213	1.72061	0.318626	3.4726e+08
144	-113.3	33.44	1165.96	3570	24.8415	26.0836	0.104423	1216	0	7.8	0	10.8985	Electricity Generation	3.12174e+10	LAKE CATHERINE	AR	0.0793689	100	9.87551	5.6581	3.43111	19.0281	31.3266	1341.18	96.1663	198.306	-362.418	56.3129	70.7906	90.6025	39.9038	52.7248	225.546	257.948	32.0165	2.74593	10.1669	8.71972	1.19422e+09	26.8095	0.321144	0.367272	32.5377	2.79063	11.2333	0.963434	85.5606	7.3382	6.41275e+08
2992	-97.9	26.69	631.591	2249.29	28.4191	29.84	0.0654225	1015	0	7.82	29.2	39.1015	Electricity Generation	1.29036e+10	J T DEELY	TX	0.0473128	4.75327	9.74771	5.65964	3.45601	19.0296	31.3515	1233.85	86.856	180.16	-380.628	38.166	63.3551	82.1449	37.5716	49.0231	207.399	239.801	13.4219	2.1251	0.86212	1.365	7.48195e+08	17.9391	0.265192	0.303283	13.7466	2.1765	0.908083	0.143777	3.12219	0.494338	4.01885e+08
1315	-97.9	29.56	868.851	3075.93	24.957	26.2048	0.0785846	120	0	6.3	0	6.64166	Stationary Combustion	1.5875e+10	PASCO COGENERATION	FL	0.0673769	1.09669	9.88447	5.66998	3.4564	19.04	31.3519	1150.8	80.3197	168.349	-392.393	26.3553	57.6559	75.773	35.2044	46.2176	195.588	227.99	16.4937	1.89833	1.17423	1.35147	8.98722e+08	18.3524	0.230655	0.263786	16.8854	1.94342	1.2091	0.139161	1.82266	0.209778	4.8269e+08
1557	-97	29.19	655.331	4371	25.5426	26.8197	0.0606447	51	0	7	0	8.71616	Stationary Combustion	1.13969e+10	MBI NGLP MONT BELVIEU PLANT	TX	0.0988107	0.860538	9.72694	5.67312	3.47397	19.0431	31.3695	947.221	69.3496	145.094	-415.659	3.10042	48.2688	64.6758	31.5017	41.3479	172.333	204.735	11.8674	1.81091	1.21074	1.84753	6.93555e+08	17.111	0.20807	0.237956	12.1691	1.85693	1.24567	0.190083	1.61715	0.246769	3.7245e+08
861	-95.9	30.69	939.029	3090	24.4733	25.697	0.0831629	136	0	6.5	30	3.66874	Electricity Generation	1.50401e+10	S O PURDOM	FL	0.0677184	1.05062	9.76189	5.6746	3.45816	19.0446	31.3537	1148.91	80.2461	168.158	-392.567	26.1646	57.5286	75.9324	35.1645	46.2846	195.398	227.799	15.6989	1.67182	1.12691	1.20008	9.51081e+08	16.5063	0.229009	0.261903	16.1142	1.71605	1.16363	0.123918	1.78567	0.190162	5.10824e+08
2963	-81.5	26.31	470.81	2752.16	30.4684	31.9918	0.0526622	460	0	0	0	47.9217	Stationary Combustion	7.00831e+09	POLK	FL	0.0595184	0.607739	9.64798	5.69033	3.50001	19.0603	31.3956	1152.42	79.9101	181.358	-379.47	39.3641	57.7263	76.2553	33.5034	46.4447	208.597	240.999	7.42557	1.57719	0.46533	0.98836	6.02264e+08	12.3294	0.22438	0.25661	7.68566	1.63243	0.483961	0.102793	0.711837	0.151194	3.23504e+08
992	-96.6	30.31	934.051	2442	24.9371	26.184	0.0843685	101	0	0	0	33.2523	Stationary Combustion	1.63866e+10	WATERFORD 1 & 2	LA	0.0519903	2.12018	9.76679	5.69169	3.47454	19.0617	31.3701	1147.45	80.0683	167.839	-392.892	25.8452	57.3982	75.7976	35.1009	46.2265	195.078	227.48	17.0581	1.82625	1.01748	1.08932	9.64869e+08	17.6792	0.228893	0.26177	17.4794	1.87136	1.05699	0.113162	2.33056	0.249511	5.1826e+08
1305	-82.1	28.81	548.698	2510	27.8521	29.2447	0.0558063	240	0.2	7.3	24.5	7.88111	Lime Manufacturing	8.45346e+09	CHEMICAL LIME LTD MARBLE FALLS PLANT	TX	0.0536408	1.42397	9.71271	5.70835	3.51431	19.0784	31.4098	1046.02	74.4777	156.179	-404.607	14.1856	52.8311	66.969	32.2783	42.3605	183.419	215.82	8.89736	1.62154	0.535293	0.975569	6.38221e+08	13.9409	0.215504	0.246458	9.17432	1.67201	0.557971	0.10169	1.12378	0.204808	3.42819e+08
2538	-99.6	27.81	681.121	4443	27.1006	28.4556	0.0668048	305	6.3	0	33	20.3267	Stationary Combustion	1.57285e+10	J K SPRUCE	TX	0.100558	10.3795	9.80846	5.71177	3.50697	19.0818	31.4025	1180.78	82.6647	185.952	-374.81	43.9585	59.7113	78.061	35.8611	47.2256	213.192	245.593	16.2383	2.38405	2.13926	3.1408	7.64004e+08	21.2542	0.244796	0.279958	16.5701	2.43277	2.24068	0.32897	7.1761	1.05357	4.10244e+08
2322	-97.3	28.19	598.411	3590	27.195	28.5547	0.059124	850	0	0	25	18.6145	Petroleum and Natural Gas Systems	1.07914e+10	COPANO PROCESSING HOUSTON CENTRAL GAS PLT	TX	0.0798544	1.44908	9.70609	5.71408	3.51645	19.0841	31.412	1022.78	75.4302	178.721	-382.052	36.727	53.4734	70.3827	33.9049	43.8568	205.96	238.362	11.2543	1.8807	0.961271	1.60637	6.76164e+08	16.6443	0.240103	0.27459	11.5479	1.92976	0.993137	0.165962	1.60307	0.267887	3.63146e+08
509	-112.5	32.06	1114.39	4880	23.8104	25.0009	0.0956932	240	0	0	0	78.942	Electricity Generation	3.05648e+10	Hugo	OK	0.111165	100	9.86898	5.72559	3.50248	19.0956	31.398	1205.77	84.7455	176.827	-383.917	34.833	61.3769	79.8734	36.4409	48.018	204.066	236.468	31.5395	2.8302	10.4943	9.41704	1.09438e+09	28.8195	0.26149	0.29905	32.0042	2.87189	11.4833	1.03045	79.5792	7.14103	5.87513e+08
3021	-98.8	26.31	560.44	3779	28.9791	30.4281	0.0590203	55	0	7.2	0	28.0891	Electricity Generation	1.30725e+10	MANATEE	FL	0.0844417	100	9.72101	5.74015	3.54263	19.1101	31.4382	1143.88	79.4933	170.273	-390.514	28.2792	57.157	75.0905	35.1496	45.926	197.512	229.914	13.5282	2.41385	5.45242	9.72881	6.74977e+08	20.0425	0.227046	0.259658	13.8207	2.46605	6.05689	1.08074	48.0703	8.57723	3.6248e+08
697	-96.8	30.94	884.421	2078	24.1968	25.4067	0.0774371	40	0	7.1	22	19.1344	Electricity Generation	1.5623e+10	Odessa-Ector Generating Station	TX	0.0431553	2.27079	9.93973	5.74301	3.53018	19.113	31.4257	1142.64	79.7613	167.185	-393.533	25.1918	57.0801	66.0395	35.0093	41.9404	194.425	226.827	16.2423	1.83649	0.829356	0.937739	8.85599e+08	18.3405	0.227813	0.260535	16.6297	1.88029	0.86338	0.097621	2.1154	0.239185	4.75698e+08
2390	-97.4	28.06	1220.91	36000	27.6416	29.0236	0.117799	2000	0	6.4	0	22.4236	Petroleum and Natural Gas Systems	2.28173e+10	COPANO PROCESSING HOUSTON CENTRAL GAS PLT	TX	0.866505	3.3567	9.89239	5.74678	3.51488	19.1168	31.4104	1344.17	101.353	145.27	-415.506	3.27669	75.6505	94.9159	41.2722	54.6276	172.51	204.912	25.3009	2.0723	22.2121	18.1931	1.3472e+09	18.7804	0.377993	0.432286	26.0107	2.13043	22.8649	1.87277	25.6703	2.10255	7.21077e+08
1210	-97.1	29.81	840.831	2805	24.9813	26.2304	0.0761177	459	3.2	7.5	25.6	29.3569	Stationary Combustion	1.49749e+10	MICHOUD	LA	0.060801	2.20409	9.91801	5.75099	3.53906	19.121	31.4346	1183.93	83.029	173.529	-387.209	31.5353	59.9197	78.678	36.0593	47.4922	200.768	233.17	15.5773	1.8526	1.06963	1.27211	8.7051e+08	17.8944	0.244853	0.280022	15.957	1.89776	1.10922	0.131919	2.30366	0.273975	4.67556e+08
722	-96.5	30.94	1018.94	2548	23.9991	25.1991	0.0884165	410	0	7.7	0	17.6078	Electricity Generation	1.8223e+10	Odessa-Ector Generating Station	TX	0.0545631	2.16812	9.8408	5.75259	3.53316	19.1226	31.4287	1182.9	83.074	173.513	-387.204	31.5195	59.8606	78.6791	36.0588	47.489	200.753	233.154	18.9255	1.85737	1.17263	1.15083	1.01116e+09	18.7166	0.245738	0.281035	19.3677	1.90077	1.21561	0.119301	2.58044	0.253247	5.43113e+08
1137	-97	29.94	815.791	2060	24.8387	26.0807	0.0734963	200	0	7.4	0	7.57612	Stationary Combustion	1.4713e+10	MICHOUD	LA	0.0427184	2.20409	9.91352	5.76713	3.55705	19.1371	31.4526	1156.67	80.8334	169.3	-391.437	27.3063	58.0603	76.782	35.3928	46.6597	196.539	228.941	15.2998	1.87545	0.77188	0.946174	8.4053e+08	18.2025	0.233462	0.266995	15.6667	1.92043	0.803498	0.0984932	1.9569	0.239878	4.5149e+08
515	-111.3	32.19	1015.75	2570	23.9108	25.1063	0.0879865	240	0	0	0	23.5587	Electricity Generation	2.5381e+10	UNION POWER STATION	AR	0.0550971	100	9.84635	5.77973	3.56054	19.1497	31.4561	1185.63	83.2416	173.828	-386.906	31.8346	60.0428	78.8284	36.1083	47.5576	201.068	233.469	26.0683	2.56641	7.86169	7.73978	1.00625e+09	25.9065	0.251951	0.28814	26.5074	2.60964	8.7508	0.86151	71.389	7.0282	5.40425e+08
1599	-99.1	29.19	778.338	2478	25.2547	26.5174	0.0713033	125	0	7.4	0	22.2511	Electricity Generation	1.57724e+10	W A PARISH	TX	0.0528641	4.10697	9.88173	5.78215	3.57372	19.1522	31.4693	1153.86	80.5421	168.777	-391.969	26.7838	57.8517	70.8805	35.2392	44.0705	196.017	228.419	16.3361	2.09885	1.07745	1.38429	8.15451e+08	20.0332	0.233107	0.266589	16.6916	2.14451	1.12504	0.144544	3.20996	0.412412	4.37989e+08
2560	-99.1	27.69	685.115	2683.27	27.5243	28.9005	0.068488	1001	6.1	9.1	24	26.016	Stationary Combustion	1.61331e+10	J K SPRUCE	TX	0.0578464	10.3795	9.85291	5.78677	3.58056	19.1568	31.4761	1259.39	89.1187	168.702	-392.065	26.7088	65.131	84.241	37.8669	49.9397	195.942	228.344	16.6704	2.43322	1.48345	2.16526	7.83254e+08	21.2835	0.279622	0.319786	17.0109	2.48292	1.57305	0.229604	6.634	0.968305	4.20679e+08
2061	-98.3	28.44	596.681	3089	26.3427	27.6598	0.0570407	58	0	7.3	0	10.3462	Stationary Combustion	1.28996e+10	EQUISTAR CHEMICALS LAPORTE COMPLEX	TX	0.0676942	12.3906	9.79686	5.78961	3.5942	19.1596	31.4897	986.416	71.6013	150.067	-410.695	8.07327	50.2198	65.2935	31.7565	41.6207	177.306	209.708	13.3453	2.23659	1.41953	2.37904	6.52338e+08	20.4576	0.216514	0.247614	13.6289	2.28413	1.50821	0.252766	6.53972	1.09602	3.5035e+08
1246	-97.9	29.81	833.041	2421.5	24.6227	25.8539	0.0743531	240	0	7.6	22	10.3003	Electricity Generation	1.60127e+10	SABINE	TX	0.0514928	1.09669	9.94741	5.80115	3.59046	19.1711	31.486	1165.78	81.5771	170.717	-390.021	28.7233	58.6862	77.2663	35.6874	46.8725	197.956	230.358	16.6021	1.99296	0.914438	1.09771	8.50329e+08	19.5244	0.238313	0.272543	16.9732	2.0375	0.941565	0.113027	1.52212	0.182719	4.56728e+08
463	-111.3	32.31	960.431	2630	23.9502	25.1477	0.0833383	412	0	0	0	14.289	Cement Production	2.55729e+10	CEMEX SOUTHEAST LLC	GA	0.0565534	100	9.84187	5.81525	3.5987	19.1852	31.4942	1118.81	80.7622	167.84	-392.9	25.846	57.8484	70.7445	36.7385	44.0097	195.079	227.481	26.2206	2.73009	7.56882	7.88065	9.53087e+08	27.5112	0.258935	0.296127	26.6362	2.77336	8.41135	0.875789	67.7388	7.05296	5.1186e+08
1930	-99	28.69	760.672	2594	26.1848	27.4941	0.0722961	1000	0	7.24	29	21.0254	Electricity Generation	1.58494e+10	W A PARISH	TX	0.0556796	39.1895	9.91446	5.81735	3.60817	19.1874	31.5037	1249.81	88.3812	165.183	-395.572	23.1893	64.4744	83.55	37.8592	49.6342	192.422	224.824	16.4196	2.15857	2.98328	3.9219	8.26804e+08	19.8592	0.274786	0.314256	16.7796	2.2059	3.28199	0.431459	23.4534	3.08325	4.44082e+08
3252	-97.9	26.19	549.93	2502	28.6795	30.1134	0.0574998	327	0	7.4	0	29.9731	Electricity Generation	1.14069e+10	J T DEELY	TX	0.0534466	100	9.82364	5.82471	3.62879	19.1947	31.5243	1165.31	81.2254	156.662	-404.13	14.6688	58.6341	77.3576	35.5252	46.9222	183.902	216.304	11.8607	2.15676	4.83295	8.78829	6.57588e+08	18.0366	0.235146	0.268922	12.1458	2.20861	5.41389	0.984469	46.3524	8.42878	3.53206e+08
974	-96.1	30.31	1028.7	2565	24.6979	25.9327	0.0920688	528	0	0	0	5.31538	Pulp and Paper Manufacturing	1.70222e+10	GEORGIA-PACIFIC PORT HUDSON OPERATIONS	LA	0.0549757	1.59298	9.91655	5.83118	3.60984	19.2012	31.5054	1148.06	79.7695	167.413	-393.321	25.4189	57.1672	74.9179	34.9002	45.8406	194.652	227.054	17.7549	1.72595	1.08319	1.05297	1.05293e+09	16.8623	0.224362	0.256588	18.2145	1.77064	1.12289	0.109156	2.16711	0.210665	5.65558e+08
185	-112.8	33.31	824.381	2910.6	25.6804	26.9645	0.0764629	590	0	0	32	4.28096	Electricity Generation	2.1332e+10	Comanche (8059)	OK	0.063364	100	9.96861	5.83356	3.6214	19.2036	31.5169	1231.19	87.0573	181.053	-379.673	39.0598	63.2063	82.3311	37.1721	49.094	208.293	240.695	21.9274	2.65986	6.97327	8.4588	8.74458e+08	25.0754	0.271344	0.310319	22.3092	2.70617	7.74885	0.93996	62.1811	7.54277	4.69627e+08
2034	-82.3	27.69	782.072	6148.28	28.9685	30.4169	0.0825707	240	0	0	0	8.67289	Electricity Generation	1.23685e+10	CHARLES LARSEN MEMORIAL POWER PLANT	FL	0.141949	0.526669	9.83486	5.8423	3.62622	19.2123	31.5218	1148.3	79.7514	167.597	-393.206	25.6037	57.4815	75.6886	35.086	46.1915	194.837	227.239	13.0008	1.66235	1.8772	2.40029	9.44308e+08	13.7675	0.224096	0.256285	13.4086	1.7145	1.93935	0.247976	2.24888	0.287554	5.07049e+08
1545	-97	29.31	649.831	4371	25.3455	26.6128	0.0596502	51	0	7	0	9.05683	Stationary Combustion	1.13278e+10	MBI NGLP MONT BELVIEU PLANT	TX	0.0988107	0.860538	9.80892	5.85446	3.6563	19.2245	31.5518	952.843	69.8232	145.99	-414.76	3.99641	48.6565	65.1125	31.6718	41.5391	173.229	205.631	11.7905	1.81439	1.20251	1.8505	6.82182e+08	17.2835	0.210744	0.241014	12.0873	1.86006	1.23688	0.190338	1.60227	0.246567	3.66341e+08
154	-112.8	33.56	924.001	3240	25.0676	26.321	0.0835267	240	0	0	0	15.1043	Electricity Generation	2.38983e+10	Comanche (8059)	OK	0.0713592	100	9.88485	5.88146	3.66481	19.2515	31.5603	1185.45	83.2992	173.902	-386.817	31.9088	60.0391	78.5272	36.0457	47.4228	201.142	233.544	24.5442	2.6563	7.85116	8.49692	9.55241e+08	25.6943	0.251633	0.287776	24.9615	2.70146	8.70134	0.941702	68.1587	7.37648	5.12981e+08
163	-113.1	33.44	1129.55	3570	24.4684	25.6919	0.0996617	1216	0	7.8	0	8.37415	Electricity Generation	2.99106e+10	LAKE CATHERINE	AR	0.0793689	100	9.99258	5.88625	3.66131	19.2563	31.5568	1342.58	96.2877	198.531	-362.193	56.5379	70.8902	90.5099	40.0007	52.6841	225.771	258.173	30.673	2.7155	9.71248	8.59853	1.13977e+09	26.9116	0.321908	0.368145	31.1704	2.75954	10.7303	0.949957	81.6681	7.23014	6.12032e+08
1981	-82.4	27.81	526.134	4474.33	28.8322	30.2738	0.0553949	779	0	0	25.5	2.62591	Electricity Generation	8.24121e+09	PASADENA POWER PLANT	TX	0.101319	0.526669	9.80331	5.89506	3.70149	19.2651	31.597	1186.31	82.8567	167.675	-393.128	25.6814	60.1107	78.8979	36.0729	47.6003	194.914	227.316	8.67295	1.64843	0.900037	1.71066	6.33516e+08	13.6902	0.240876	0.275475	8.94693	1.7005	0.930663	0.176887	1.13835	0.216361	3.40227e+08
2797	-100.3	29.19	4673.37	27693	24.8051	26.0453	0.39976	1100	0	7.08	29.5	106.642	Electricity Generation	1.07308e+11	W A PARISH	TX	0.664879	10.188	9.93577	5.89747	3.63076	19.2675	31.5263	1551.74	112.831	171.536	-389.208	29.5424	85.2261	105.513	44.733	59.274	198.775	231.177	117.558	2.51549	81.1361	17.3614	4.5718e+09	25.7137	0.403985	0.462012	119.903	2.56567	83.0829	1.77779	111.967	2.39586	2.44607e+09
280	-112	33.06	800.032	2628.16	25.9297	27.2261	0.0749749	470	0	7.11	25.47	3.11148	Stationary Combustion	2.01697e+10	Hereford Renewable Energy, LLC	TX	0.0565088	100	9.99116	5.91383	3.7027	19.2838	31.5982	1208.83	85.2111	177.552	-383.174	35.5586	61.6645	81.0601	36.8986	48.5359	204.792	237.193	20.7576	2.5946	6.64818	8.3099	8.5744e+08	24.2088	0.260931	0.298411	21.1321	2.64141	7.40643	0.925767	60.7822	7.59747	4.60511e+08
791	-95.9	30.81	929.851	4213	24.5133	25.739	0.0823137	302	3.6	7.7	23.9	21.8173	Electricity Generation	1.49169e+10	S O PURDOM	FL	0.0949757	1.05062	9.89415	5.92923	3.71331	19.2992	31.6088	1167.35	81.7418	171.037	-389.684	29.0437	58.7826	69.8523	35.5889	43.6148	198.277	230.679	15.5605	1.67344	1.54102	1.65728	9.4137e+08	16.5297	0.23682	0.270836	15.9714	1.71763	1.58855	0.170839	2.20416	0.237045	5.05545e+08
705	-95.9	30.94	944.741	2100	24.3047	25.52	0.08311	240	0	0	0	32.6719	Electricity Generation	1.51191e+10	S O PURDOM	FL	0.0436893	0.929118	9.91613	5.93908	3.72267	19.3091	31.6182	1158.3	81.0232	169.622	-391.096	27.628	58.1476	76.8553	35.3122	46.6885	196.861	229.263	15.7855	1.67088	0.746047	0.789684	9.50476e+08	16.608	0.233359	0.266878	16.2013	1.71489	0.771815	0.0816959	1.32163	0.139893	5.10553e+08
832	-97.1	30.69	903.161	2841.71	24.4721	25.6957	0.0799094	33	7.5	7	24.1	16.8055	Stationary Combustion	1.65994e+10	PUTNAM	FL	0.061692	2.27079	9.88882	5.94079	3.72636	19.3108	31.6219	1143.73	79.8287	167.337	-393.386	25.3433	57.1578	75.4454	35.0161	46.0704	194.576	226.978	17.2313	1.90789	1.19555	1.32374	9.13873e+08	18.8553	0.228376	0.261179	17.6306	1.9521	1.23803	0.137077	2.5299	0.280116	4.90839e+08
2906	-99.1	27.31	820.441	6051.84	27.5851	28.9643	0.0817421	2000	2.3	8.3	28.4	30.1979	Stationary Combustion	1.98082e+10	J K SPRUCE	TX	0.139608	10.3795	9.87884	5.95164	3.73608	19.3216	31.6316	1407.4	101.247	174.561	-386.211	32.5671	75.3413	95.4358	42.0104	54.8551	201.8	234.202	20.4919	2.49767	3.48042	4.24213	9.34833e+08	21.9204	0.34423	0.393674	20.8888	2.54604	3.61892	0.441095	9.65644	1.17698	5.01853e+08
1822	-81.8	27.94	544.43	3978.34	28.7092	30.1447	0.0570873	1392	0	0	24	10.6875	Electricity Generation	8.73487e+09	LOST PINES 1	TX	0.0892802	0.850795	9.87958	5.9553	3.75984	19.3253	31.6554	1236.25	86.9193	242.515	-318.287	100.522	63.5495	82.5245	37.282	49.1924	269.755	302.157	9.1815	1.68644	0.855195	1.57081	6.52871e+08	14.0633	0.262872	0.30063	9.46397	1.73833	0.885189	0.16259	1.23096	0.2261	3.50636e+08
567	-93.3	31.81	809.756	2028.85	23.8795	25.0734	0.0699963	18	0	0	0	10.2291	Petroleum and Natural Gas Systems	1.17016e+10	LOGANSPORT EXPANSION GATHERING FACILITY	LA	0.0419623	0.376963	9.99266	5.95654	3.74911	19.3265	31.6447	945.627	69.4072	145.047	-415.665	3.05299	48.1573	64.6597	31.5279	41.3334	172.286	204.688	12.2648	1.51462	0.533926	0.659367	8.00503e+08	15.3213	0.207535	0.237345	12.6152	1.5579	0.551231	0.0680737	0.739108	0.0912754	4.30003e+08
696	-96.6	30.94	931.581	2787	24.0669	25.2702	0.0810394	50	0	6.7	0	10.1321	Electricity Generation	1.65188e+10	Odessa-Ector Generating Station	TX	0.0603641	2.16812	9.89497	5.96163	3.74648	19.3316	31.642	1145.21	79.9842	167.611	-393.106	25.6175	57.2664	75.6297	35.0935	46.1504	194.851	227.252	17.1609	1.84212	1.16421	1.24972	9.26796e+08	18.5163	0.229027	0.261924	17.5661	1.88562	1.20595	0.129452	2.45687	0.263731	4.97785e+08
320	-111.8	32.81	1079.06	2660	25.1557	26.4135	0.0981912	600	0	7.8	19	6.95572	Electricity Generation	2.7683e+10	Larkspur Energy Faciity	CA	0.0572816	100	10.0271	5.9725	3.74821	19.3425	31.6437	1233.62	87.2439	181.41	-379.32	39.4168	63.3718	71.9472	37.2189	44.536	208.65	241.052	28.4502	2.63659	8.80029	8.15555	1.12295e+09	25.3352	0.272726	0.311899	28.9404	2.68202	9.79355	0.907604	79.6961	7.38573	6.031e+08
1176	-97.1	29.94	808.591	2805	24.9041	26.1493	0.072948	577	0	7.3	22	23.8462	Stationary Combustion	1.4785e+10	MICHOUD	LA	0.060801	2.20409	10.0222	5.97532	3.76565	19.3453	31.6612	1198.2	84.2181	175.786	-384.951	33.7921	60.9099	80.0158	36.4916	48.0792	203.025	235.427	15.3617	1.89981	1.05142	1.30032	8.3426e+08	18.4136	0.251563	0.287697	15.7257	1.94483	1.08937	0.134724	2.23407	0.276291	4.48083e+08
140	-112.9	33.56	880.281	3230	25.1353	26.3921	0.0797955	240	0	0	0	16.0741	Electricity Generation	2.3202e+10	Palomar Energy Center	CA	0.0711165	100	9.9128	5.99344	3.77908	19.3634	31.6746	1186.6	83.3842	174.069	-386.653	32.0752	60.1175	78.6336	36.0819	47.4698	201.308	233.71	23.8184	2.70577	7.52111	8.54399	9.1257e+08	26.1003	0.252353	0.2886	24.2169	2.75104	8.33317	0.946649	65.1343	7.39926	4.90064e+08
1690	-99.1	29.06	719.251	2561	25.5309	26.8074	0.0666144	255	0	6.47	25.5	9.16076	Electricity Generation	1.45257e+10	W A PARISH	TX	0.0548786	39.1895	9.97411	5.99352	3.78887	19.3635	31.6844	1166.89	81.6167	170.833	-389.915	28.8395	58.7642	77.3374	35.6217	46.9055	198.073	230.474	15.0519	2.09272	2.73246	3.79904	7.61827e+08	19.7576	0.238613	0.272887	15.3838	2.13887	3.00746	0.418138	21.5937	3.00225	4.09184e+08
115	-112.6	33.69	898.701	4720	24.4737	25.6974	0.079081	240	0	0	0	29.9429	Electricity Generation	2.25036e+10	Blythe Energy	CA	0.107282	100	10.0861	6.01024	3.79636	19.3802	31.6919	1191.46	83.7691	174.833	-385.884	32.8392	60.4388	78.9248	36.186	47.5968	202.072	234.474	23.2192	2.58364	8.26605	9.19777	9.04399e+08	25.6737	0.25387	0.290335	23.6064	2.62672	9.08282	1.01066	65.3628	7.27303	4.85568e+08
179	-111.8	33.44	1121.25	2040	24.4038	25.624	0.0989682	1000	9.5	7.4	24	14.3353	Electricity Generation	3.10757e+10	WASHINGTON COUNTY POWER, LLC	GA	0.042233	100	10.0683	6.02126	3.79661	19.3913	31.6922	1310.66	93.6784	193.523	-367.2	51.5293	68.6807	88.7387	39.1895	51.9062	220.762	253.164	31.8552	2.84104	8.5727	7.64565	1.13184e+09	28.1447	0.309237	0.353654	32.3499	2.88517	9.56695	0.853239	80.0273	7.13732	6.07912e+08
817	-96.4	30.69	1045.7	2482	24.3745	25.5933	0.0922655	2000	0	0	0	5.21529	Stationary Combustion	1.82408e+10	Permian Basin	TX	0.0529612	1.80502	10.0211	6.02148	3.80004	19.3915	31.6956	1337.05	95.6803	197.666	-363.059	55.6725	70.5115	90.6114	39.8081	52.7288	224.906	257.307	18.9748	1.81455	1.12655	1.07731	1.05518e+09	17.9825	0.312606	0.357508	19.4359	1.85864	1.16735	0.111633	2.35309	0.225025	5.66764e+08
2977	-81.6	26.06	419.07	3640.8	30.877	32.4209	0.0475071	23	0	0	0	53.0716	Stationary Combustion	6.2741e+09	POLK	FL	0.0810873	0.607739	9.77403	6.03059	3.84724	19.4006	31.7428	1123.85	77.5558	168.638	-392.196	26.6443	55.749	73.9165	33.9268	45.4191	195.877	228.279	6.6475	1.58625	0.560112	1.33656	5.43308e+08	12.2352	0.211655	0.242056	6.8818	1.64216	0.581951	0.138867	0.787505	0.187917	2.91812e+08
104	-112.8	33.69	859.461	3240	24.7475	25.9849	0.0766917	240	0	0	0	39.9819	Electricity Generation	2.13257e+10	Blythe Energy	CA	0.0713592	100	10.0969	6.04311	3.83079	19.4131	31.7263	1184.88	83.2377	173.788	-386.927	31.7947	59.9741	78.4399	36.0952	47.3837	201.028	233.43	21.92	2.55044	7.16476	8.33635	8.77074e+08	24.9922	0.250856	0.286888	22.3033	2.59504	7.94545	0.924469	62.538	7.27642	4.71009e+08
1829	-99.5	28.81	678.341	2275	25.9027	27.1979	0.0637622	60	0	6.8	24	42.3962	Electricity Generation	1.46409e+10	W A PARISH	TX	0.0479369	9.53079	9.98439	6.05733	3.85519	19.4273	31.7507	1147.3	79.9578	180.506	-380.244	38.5128	57.3783	75.6223	31.7476	46.1529	207.746	240.148	15.1456	2.23275	1.16982	1.72454	7.29208e+08	20.77	0.230475	0.263579	15.4634	2.27959	1.24484	0.183513	5.57155	0.821351	3.91674e+08
1734	-99.1	28.94	695.978	4102	25.9017	27.1967	0.0652527	255	0	6.47	25.5	8.43674	Electricity Generation	1.41205e+10	W A PARISH	TX	0.0922816	39.1895	9.98643	6.06722	3.86376	19.4372	31.7593	1169.68	81.818	171.254	-389.497	29.2604	58.9572	77.5609	35.6518	47.0042	198.493	230.895	14.6246	2.10131	3.21705	4.62234	7.46254e+08	19.5974	0.239266	0.273633	14.9493	2.14795	3.49813	0.502621	21.701	3.11806	4.00744e+08
2545	-99.5	27.69	588.701	5100	27.3741	28.7428	0.0582871	90	0	7.1	0	15.7319	Stationary Combustion	1.33128e+10	J K SPRUCE	TX	0.116505	10.3795	9.99081	6.07369	3.87696	19.4437	31.7725	1153.99	80.4432	192.125	-368.639	50.1315	57.8667	76.1089	35.1676	46.3691	219.365	251.766	13.7537	2.33628	2.04418	3.47237	6.66593e+08	20.6329	0.232358	0.265733	14.043	2.38542	2.13722	0.36304	6.44304	1.09445	3.5791e+08
1914	-97.3	28.69	868.651	12051	26.1598	27.4677	0.0819172	2000	0	7.1	23.89	4.18929	Electricity Generation	1.52331e+10	MULBERRY COGENERATION FACILITY	FL	0.285218	2.27587	9.95319	6.08884	3.87318	19.4588	31.7687	1346.73	96.0819	155.507	-405.254	13.5132	71.1807	90.5554	39.9104	52.7106	182.746	215.148	15.9031	1.83079	4.67202	5.37848	9.36835e+08	16.9754	0.312996	0.357953	16.3697	1.8845	4.82332	0.555266	6.14978	0.707969	5.02853e+08
514	-112.5	31.94	970.111	4880	23.9615	25.1595	0.0838994	240	0	0	0	80.1035	Electricity Generation	2.5671e+10	Hugo	OK	0.111165	100	10.0169	6.10814	3.89128	19.4781	31.7868	1201.05	84.3566	176.068	-384.678	34.0744	61.0503	79.5105	36.2303	47.8592	203.307	235.709	26.3993	2.72127	9.06161	9.34079	9.59504e+08	27.5135	0.258517	0.295649	26.8087	2.76347	9.92912	1.0235	69.6341	7.17796	5.15118e+08
588	-102.8	31.31	914.101	10887	23.8162	25.007	0.0775017	62	0	7.1	21	21.1413	Stationary Combustion	2.15915e+10	PEGASUS GAS PLANT	TX	0.256966	100	10.1319	6.11196	3.89915	19.482	31.7947	1010.68	74.6303	155.234	-405.476	13.2406	52.636	71.0385	33.1307	44.1336	182.474	214.876	22.4166	2.45231	11.42	12.4932	8.86338e+08	25.2913	0.24176	0.276485	22.8479	2.4995	12.2861	1.34406	67.4032	7.37372	4.75535e+08
2504	-99.5	27.81	766.721	15496.2	27.21	28.5705	0.0740852	305	5.5	7.5	28.4	26.1807	Stationary Combustion	1.7285e+10	J K SPRUCE	TX	0.36884	10.3795	10.0889	6.11932	3.90892	19.4893	31.8045	1264.08	89.2892	163.919	-396.844	21.9254	65.454	83.286	34.4719	49.5196	191.158	223.56	18.3464	2.39284	7.32844	9.55816	8.47266e+08	21.6536	0.278286	0.318258	18.7692	2.44798	7.55889	0.985873	13.0239	1.69865	4.54268e+08
810	-97	30.69	815.101	5459.41	24.5397	25.7667	0.0720339	30	3.6	6.7	24.5	17.1721	Stationary Combustion	1.47684e+10	PUTNAM	FL	0.125228	2.27079	10.1004	6.1358	3.92683	19.5058	31.8224	1148.32	80.1856	168.057	-392.665	26.0637	57.4741	75.7193	35.0588	46.1906	195.297	227.699	15.3179	1.87926	2.03769	2.49992	8.23806e+08	18.594	0.229644	0.262629	15.677	1.92332	2.0987	0.257478	3.26288	0.400304	4.42324e+08
1467	-97	29.31	593.441	4371	25.3455	26.6128	0.054474	51	0	7	0	4.1362	Stationary Combustion	1.03448e+10	MBI NGLP MONT BELVIEU PLANT	TX	0.0988107	0.860538	9.97231	6.13871	3.94622	19.5087	31.8418	952.65	69.8135	145.969	-414.781	3.97527	48.6481	65.1022	31.673	41.5345	173.208	205.61	10.7674	1.81439	1.09816	1.8505	6.22984e+08	17.2835	0.210692	0.240955	11.0384	1.86006	1.12954	0.190338	1.46323	0.246567	3.34551e+08
526	-111.6	32.06	852.591	2210	23.8564	25.0492	0.0738122	240	0	0	0	52.1329	Electricity Generation	2.04804e+10	UNION POWER STATION	AR	0.0463592	100	10.1376	6.14876	3.93846	19.5188	31.834	1182.96	82.9588	173.324	-387.415	31.3304	59.8296	78.4255	36.0826	47.3816	200.563	232.965	21.0615	2.47029	6.36668	7.46745	8.44143e+08	24.9501	0.249888	0.285781	21.4297	2.51349	7.10972	0.833896	59.6604	6.99755	4.53393e+08
776	-96.5	31.06	849.773	2548	23.9918	25.1914	0.0737072	410	0	7.7	0	14.5531	Electricity Generation	1.51192e+10	Odessa-Ector Generating Station	TX	0.0545631	2.16812	10.1472	6.16144	3.95121	19.5314	31.8467	1182.5	83.0472	173.459	-387.257	31.4658	59.836	78.6878	36.0472	47.4927	200.699	233.101	15.705	1.84814	0.973615	1.14574	8.42942e+08	18.6312	0.245524	0.28079	16.0737	1.89152	1.00945	0.118791	2.14722	0.252681	4.52758e+08
1100	-96.6	30.06	773.451	2277	24.7006	25.9356	0.0692747	200	0	6.9	23	21.4428	Stationary Combustion	1.35391e+10	WATERFORD 1 & 2	LA	0.0479854	0.833344	10.0957	6.16176	3.95491	19.5318	31.8504	1156.87	80.8328	169.309	-391.427	27.3151	58.0598	76.6911	35.3948	46.6196	196.548	228.95	14.0911	1.82185	0.718325	0.928728	7.92251e+08	17.7861	0.233138	0.266625	14.4369	1.86656	0.7406	0.0957527	1.15163	0.148896	4.25549e+08
1569	-98.5	29.19	849.021	2228.62	25.4348	26.7065	0.0783768	174	4.1	5.3	28.6	4.29263	Stationary Combustion	1.6351e+10	ELLWOOD TEXAS FORGE HOUSTON	TX	0.0468112	3.05015	10.1714	6.16975	3.9563	19.5398	31.8518	1155.06	80.6587	168.997	-391.749	27.0037	57.9524	76.4053	35.3266	46.496	196.237	228.639	16.974	1.99924	0.969151	1.14149	8.96345e+08	18.9369	0.232988	0.266454	17.3648	2.04527	1.01097	0.119075	2.71306	0.319552	4.81459e+08
1870	-96.3	28.81	588.311	14887	26.6742	28.0079	0.056633	95	0	7.5	0	17.7073	Petroleum Refining	8.8701e+09	VALERO REFINING HOUSTON REFINERY	TX	0.354053	0.652484	9.99761	6.1803	3.98537	19.5503	31.8809	1112.05	77.7572	200.324	-360.439	58.3307	55.7232	75.0912	34.9057	45.922	227.564	259.966	9.30833	1.58221	3.32263	5.64775	6.47676e+08	14.3719	0.21927	0.250765	9.63691	1.63807	3.44258	0.585164	3.7055	0.629854	3.47652e+08
1460	-81.1	28.31	534.32	8220	28.7907	30.2303	0.0558633	1357	0	7.9	22.3	20.5762	Electricity Generation	8.55576e+09	COTTONWOOD ENERGY PROJECT	TX	0.192233	0.605994	9.97916	6.18709	3.99301	19.5571	31.8886	1246.96	87.7738	183.076	-377.721	41.0825	64.2785	83.3183	37.4667	49.54	210.316	242.717	8.97341	1.67941	1.74971	3.27464	6.38873e+08	14.0457	0.266811	0.305135	9.24895	1.73097	1.80599	0.337998	2.04688	0.383081	3.42965e+08
1654	-81.1	28.06	478.2	2080	28.8014	30.2414	0.050366	240	0	0	0	11.986	Electricity Generation	7.64973e+09	COTTONWOOD ENERGY PROJECT	TX	0.0432039	0.605994	9.91924	6.1919	4.00453	19.5619	31.9001	1142.53	79.3303	166.712	-394.086	24.7183	57.0796	75.4271	35.0244	46.0757	193.951	226.353	8.05148	1.6837	0.370144	0.774036	5.76003e+08	13.9782	0.222433	0.254383	8.30122	1.73593	0.383939	0.0802882	0.601263	0.125735	3.09411e+08
76	-114.9	33.69	808.81	2330	25.0467	26.299	0.0732091	240	0	0	0	22.5767	Electricity Generation	2.24412e+10	JEFFERIES	SC	0.0492718	100	10.1584	6.19539	3.98553	19.5654	31.8811	1187.9	83.4891	174.249	-386.474	32.2558	60.2003	78.8505	36.1106	47.5654	201.489	233.891	23.0151	2.84556	6.48024	8.01208	8.37246e+08	27.4891	0.254153	0.290659	23.381	2.89079	7.21805	0.892429	59.3372	7.33636	4.49669e+08
798	-97.1	30.81	809.631	3297	24.4738	25.6975	0.0715543	30	3.6	6.7	24.5	24.2838	Stationary Combustion	1.51329e+10	PUTNAM	FL	0.0727427	2.27079	10.1348	6.20498	3.99636	19.575	31.8919	1145.24	79.9562	167.578	-393.141	25.5848	57.2547	75.5322	35.0453	46.1079	194.818	227.22	15.695	1.93853	1.26035	1.5567	8.18321e+08	19.1795	0.229195	0.262116	16.0525	1.98269	1.30233	0.160855	2.45906	0.303726	4.39492e+08
202	-111.8	33.31	890.381	2410	24.2787	25.4926	0.0781233	250	0	0	24	5.87884	Stationary Combustion	2.54391e+10	CARDINAL GLASS PLT	OK	0.0512136	100	10.1936	6.21045	3.99717	19.5804	31.8927	1195.08	84.11	175.406	-385.318	33.4121	60.7125	79.5601	36.4354	47.8769	202.645	235.047	26.0485	2.92555	7.03915	7.90578	8.93447e+08	29.1551	0.258726	0.295888	26.4389	2.96939	7.82704	0.879067	63.443	7.12538	4.79839e+08
849	-96.4	30.69	1002.3	2482	24.3745	25.5933	0.0884361	2000	0	0	0	7.5928	Stationary Combustion	1.74837e+10	Permian Basin	TX	0.0529612	1.80502	10.1001	6.21273	3.99329	19.5827	31.8888	1337.15	95.6856	197.677	-363.048	55.6838	70.516	90.2745	39.8076	52.5809	224.917	257.319	18.1873	1.81455	1.07979	1.07731	1.01139e+09	17.9825	0.312634	0.35754	18.6292	1.85864	1.1189	0.111633	2.25543	0.225025	5.43241e+08
160	-112.6	33.44	994.991	3240	23.9041	25.0993	0.0857899	436	8.5	7.7	24	21.642	Electricity Generation	2.44354e+10	Comanche (8059)	OK	0.0713592	100	10.0886	6.21302	3.99506	19.583	31.8906	1215.85	85.8312	178.688	-382.027	36.6942	62.1305	80.6439	36.7919	48.3511	205.927	238.329	25.0992	2.52256	8.05604	8.0966	9.81125e+08	25.5821	0.265262	0.303364	25.528	2.56565	8.92928	0.897423	69.9978	7.03502	5.26882e+08
1118	-97.1	30.06	909.488	4020	24.6573	25.8902	0.0810389	289	0	6.9	0	10.9642	Stationary Combustion	1.69532e+10	SAN JACINTO COUNTY PEAKING FACILITY	TX	0.0902913	3.99788	10.04	6.21886	4.00372	19.5889	31.8993	1173.26	82.2057	171.925	-388.806	29.9318	59.2017	77.8604	35.7173	47.1322	199.165	231.567	17.5827	1.93325	1.82416	2.0057	9.2679e+08	18.9716	0.240999	0.275616	17.9868	1.97768	1.89247	0.20808	4.19871	0.461656	4.97704e+08
2814	-99.4	27.69	605.301	3289.48	27.5658	28.9441	0.0605468	800	3.3	8.8	27.8	11.9711	Stationary Combustion	1.38913e+10	J K SPRUCE	TX	0.0725601	10.3795	10.0331	6.22075	4.02169	19.5908	31.9172	1233.25	86.9739	173.457	-387.311	31.463	63.3409	82.4504	37.5985	49.1536	200.696	233.098	14.3624	2.37277	1.50107	2.47988	6.92435e+08	20.7419	0.267672	0.30612	14.6633	2.42248	1.58467	0.261798	6.05848	1.0009	3.71874e+08
120	-113.4	33.56	798.186	2200	24.0144	25.2152	0.0692982	240	0	0	0	1.70861	Stationary Combustion	2.18308e+10	BRADLEY COMPRESSOR STATION	OK	0.0461165	100	10.1343	6.22904	4.02217	19.599	31.9177	999.821	73.8807	153.513	-407.208	11.5197	51.9061	68.8486	33.3854	43.1742	180.753	213.155	22.3748	2.80321	6.09249	7.63293	7.9252e+08	28.2325	0.240605	0.275165	22.7212	2.84661	6.78987	0.850663	56.1254	7.03162	4.25653e+08
748	-97.3	31.06	977.219	3121	23.8848	25.079	0.0842545	240	0	0	0	6.27356	Stationary Combustion	1.85484e+10	TEMPLE INLAND BOGALUSA MILL	LA	0.0684709	2.61663	10.0853	6.24716	4.03008	19.6172	31.9256	1169.89	82.0438	171.519	-389.194	29.5254	58.9739	77.7817	35.6698	47.0942	198.758	231.16	19.2112	1.9659	1.4764	1.51082	9.63565e+08	19.9376	0.240992	0.275607	19.6325	2.00902	1.52693	0.156252	3.09642	0.316861	5.17503e+08
2845	-99.3	27.56	567.921	2120	27.4701	28.8437	0.0567116	282	10.9	8.9	22.1	12.6208	Stationary Combustion	1.40443e+10	J K SPRUCE	TX	0.0441748	10.3795	10.0586	6.25788	4.06282	19.6279	31.9584	1174.11	82.1197	189.327	-371.441	47.3333	59.2587	77.776	35.8259	47.1016	216.566	248.968	14.4921	2.55179	1.07005	1.88416	6.48574e+08	22.3446	0.243086	0.278002	14.7742	2.60146	1.14043	0.200808	5.33142	0.938761	3.48366e+08
1015	-97	30.19	704.163	3357	24.6668	25.9002	0.0628233	200	0	7.3	0	16.8262	Petroleum and Natural Gas Systems	1.32377e+10	TARGA MIDSTREAM SERVICES LLC - LOWRY GAS PROCESSING PLANT	LA	0.074199	1.93098	10.0862	6.26032	4.05905	19.6303	31.9546	972.056	71.4819	149.079	-411.653	7.08545	49.9747	66.6113	32.0934	42.1938	176.318	208.72	13.7301	1.94985	1.10735	1.57257	7.1847e+08	19.1102	0.221044	0.252794	14.0435	1.99436	1.14253	0.162254	2.00614	0.284896	3.85862e+08
2142	-98.3	28.31	541.05	3048.37	26.5254	27.8517	0.0521034	295	0	9.6	20.8	8.08702	Petroleum and Natural Gas Systems	1.1788e+10	TARGA MIDSTREAM SERVICES LLC - VENICE GAS PROCESSING PLANT	LA	0.0667081	12.3906	9.99609	6.29637	4.10676	19.6664	32.0023	982.712	72.2283	166.57	-394.196	24.5759	50.7188	67.2792	32.4141	42.493	193.809	226.211	12.1953	2.254	1.28498	2.37497	5.95873e+08	20.4662	0.225839	0.258277	12.4543	2.30187	1.36572	0.25242	5.96174	1.10188	3.20027e+08
670	-96.5	31.06	810.011	2548	23.9918	25.1914	0.0702583	240	0	0	0	13.9667	Electricity Generation	1.44118e+10	Odessa-Ector Generating Station	TX	0.0545631	2.16812	10.2023	6.31054	4.10291	19.6805	31.9985	1164.89	81.6028	170.698	-390.018	28.7048	58.6213	77.3156	35.7986	46.8903	197.938	230.34	14.9701	1.84814	0.928058	1.14574	8.03499e+08	18.6312	0.237803	0.27196	15.3216	1.89152	0.962217	0.118791	2.04675	0.252681	4.31573e+08
647	-94.6	31.19	759.581	2924.38	24.6067	25.837	0.0676132	203	1.9	8.7	17.3	9.27798	Stationary Combustion	1.15386e+10	BUCKEYE FLORIDA	FL	0.0636984	0.646426	10.1832	6.31374	4.10825	19.6837	32.0038	1152.44	80.5457	168.728	-391.993	26.7343	57.7667	76.1281	35.2643	46.3698	195.967	228.369	12.0766	1.5899	0.801179	1.05477	7.73249e+08	15.618	0.22997	0.263002	12.4146	1.6344	0.827005	0.108877	1.13818	0.149844	4.15323e+08
1573	-99.4	29.19	836.871	2207.95	25.1517	26.4093	0.0763694	2000	0	7.4	0	36.7539	Electricity Generation	1.76494e+10	W A PARISH	TX	0.0463095	4.10697	10.2466	6.32276	4.11066	19.6928	32.0062	1375.21	98.7536	203.47	-357.276	61.4764	73.1131	93.094	41.0184	53.8223	230.709	263.111	18.2546	2.1813	1.07441	1.28384	8.73388e+08	20.9009	0.331115	0.378675	18.6354	2.2268	1.1229	0.134179	3.35601	0.401019	4.6912e+08
1087	-82.4	29.19	565.27	3090	26.8239	28.165	0.0552955	240	0	0	0	28.9251	Electricity Generation	8.12988e+09	BOSQUE COUNTY POWER PLANT	TX	0.0677184	0.999417	10.06	6.32307	4.1296	19.6931	32.0251	1146.02	79.7046	167.363	-393.412	25.3696	57.3035	75.6995	35.0858	46.1912	194.603	227.004	8.56822	1.51577	0.620584	1.09785	6.32379e+08	13.5492	0.224229	0.256437	8.84289	1.56436	0.64462	0.114038	1.03808	0.183643	3.39663e+08
1512	-99.1	29.19	682.971	2478	25.2547	26.5174	0.0625668	150	0	7.39	23.1	33.6951	Electricity Generation	1.38399e+10	W A PARISH	TX	0.0528641	4.10697	10.1246	6.33748	4.13646	19.7075	32.032	1157.15	80.7979	169.271	-391.475	27.2775	58.0669	76.3784	35.3357	46.4841	196.511	228.912	14.3345	2.09885	0.94543	1.38429	7.15536e+08	20.0332	0.234474	0.268153	14.6464	2.14451	0.987195	0.144544	2.81665	0.412412	3.84324e+08
1752	-98.8	28.94	1598.71	24602	25.8806	27.1746	0.14485	2000	0	8.8	0	20.4619	Electricity Generation	3.16431e+10	W A PARISH	TX	0.589854	11.0304	10.1608	6.34793	4.10818	19.7179	32.0037	1543.46	112.146	229.853	-330.9	87.859	84.7413	104.104	48.8393	58.6571	257.092	289.494	34.4755	2.15646	21.5023	13.4498	1.65655e+09	20.8116	0.398366	0.455586	35.3286	2.20982	22.1588	1.38604	33.5011	2.09551	8.87167e+08
486	-112.5	32.06	946.731	4880	23.8104	25.0009	0.081296	240	0	0	0	75.4382	Electricity Generation	2.59663e+10	Hugo	OK	0.111165	100	10.1144	6.35136	4.13608	19.7214	32.0316	1205.63	84.7388	176.812	-383.931	34.8184	61.3711	80.665	36.377	48.3655	204.051	236.453	26.7943	2.8302	8.9154	9.41704	9.2973e+08	28.8195	0.261454	0.299009	27.1891	2.87189	9.75559	1.03045	67.6064	7.14103	4.9912e+08
792	-96.9	30.81	764.381	2331.95	24.4167	25.6376	0.0675223	138	2.3	6.6	25.6	20.2944	Stationary Combustion	1.3638e+10	PUTNAM	FL	0.0493192	2.27079	10.2111	6.36266	4.15724	19.7327	32.0528	1152.8	80.5802	168.764	-391.956	26.7708	57.7804	75.9989	35.2348	46.313	196.004	228.406	14.1762	1.8546	0.81113	1.06116	7.72209e+08	18.358	0.232141	0.265484	14.5138	1.89877	0.842869	0.110268	1.93455	0.253088	4.14778e+08
797	-97	30.81	770.921	3595	24.488	25.7124	0.0681571	30	3.6	6.7	24.5	21.4703	Stationary Combustion	1.40966e+10	PUTNAM	FL	0.0799757	2.27079	10.1959	6.36463	4.1587	19.7346	32.0542	1145.01	79.9337	167.543	-393.177	25.5493	57.2417	75.5085	35.0622	46.0977	194.782	227.184	14.6303	1.89777	1.28309	1.66436	7.7947e+08	18.7695	0.228741	0.261597	14.9707	1.94193	1.32553	0.171941	2.42731	0.314858	4.18613e+08
896	-96	30.44	871.621	6740.7	24.5014	25.7264	0.0769144	500	0	7.2	23	10.8603	Pulp and Paper Manufacturing	1.44518e+10	GEORGIA-PACIFIC PORT HUDSON OPERATIONS	LA	0.156328	1.05062	10.2952	6.38084	4.16839	19.7508	32.0639	1156.9	80.4725	168.813	-391.916	26.8194	57.7719	75.2527	34.969	45.9869	196.052	228.454	15.0317	1.72457	2.40888	2.76368	8.79622e+08	17.0888	0.227625	0.26032	15.5442	1.78337	2.49692	0.286469	3.07198	0.352444	4.72238e+08
503	-112.5	32.06	860.809	4880	23.8104	25.0009	0.0739178	240	0	0	0	75.1639	Electricity Generation	2.36096e+10	Hugo	OK	0.111165	100	10.2698	6.384	4.17365	19.754	32.0692	1205.63	84.7388	176.812	-383.932	34.8182	61.3711	79.8526	36.2935	48.0089	204.051	236.453	24.3626	2.8302	8.10626	9.41704	8.45351e+08	28.8195	0.261454	0.299009	24.7215	2.87189	8.87021	1.03045	61.4706	7.14103	4.53822e+08
710	-97.3	31.06	889.799	3121	23.8848	25.079	0.0767173	222	0	8.4	19	10.2747	Stationary Combustion	1.68891e+10	TEMPLE INLAND BOGALUSA MILL	LA	0.0684709	2.61663	10.3048	6.39429	4.18196	19.7643	32.0775	1168.04	81.8869	171.222	-389.491	29.2281	58.8424	77.4322	35.6886	46.9408	198.461	230.863	17.4926	1.9659	1.34433	1.51082	8.77367e+08	19.9376	0.240153	0.274648	17.8763	2.00902	1.39033	0.156252	2.81942	0.316861	4.71208e+08
176	-113	33.31	758.111	2200	25.4216	26.6927	0.0697083	700	3.9	8.2	24	13.4716	Electricity Generation	2.04269e+10	LAKE CATHERINE	AR	0.0461165	100	10.2384	6.40122	4.19403	19.7712	32.0896	1251.78	88.7584	184.257	-376.471	42.2633	64.618	83.7265	37.7367	49.7069	211.496	243.898	20.9756	2.76682	6.05791	7.9908	7.97209e+08	26.3112	0.281484	0.321915	21.3238	2.81276	6.75951	0.891626	56.3879	7.43795	4.2818e+08
1425	-96.6	29.44	1039.46	32984	25.195	26.4547	0.0911212	240	0	5.75	0	3.44808	Petroleum and Natural Gas Systems	1.73255e+10	MONT BELVIEU COMPLEX	TX	0.793301	1.34112	10.1579	6.40261	4.18193	19.7726	32.0775	1153.44	85.9033	177.471	-383.278	35.4773	62.5063	89.4313	38.8788	52.2149	204.71	237.112	19.3134	1.85802	15.4106	14.8256	1.0421e+09	18.5332	0.295441	0.337877	19.8677	1.91134	15.8619	1.52598	16.7289	1.60938	5.577e+08
1903	-95.9	28.69	425.23	2761	29.993	31.4926	0.0463561	785	0	7.8	0	4.25763	Stationary Combustion	6.89766e+09	LUBRIZOL DEER PARK PLANT	TX	0.059733	0.652484	9.96177	6.40656	4.22492	19.7766	32.1205	1023.23	74.5147	172.794	-387.978	30.8001	52.7669	68.3089	34.2032	42.9462	200.033	232.435	7.26667	1.70888	0.456148	1.07271	5.30145e+08	13.7069	0.227018	0.259626	7.49706	1.76306	0.472887	0.111207	0.688241	0.161851	2.8476e+08
2170	-82.4	27.44	625.871	4010	29.2806	30.7446	0.0670158	1490	0	7.2	28.5	12.4861	Stationary Combustion	9.85651e+09	TROPICANA MANUFACTURING CO INC	FL	0.0900485	0.43467	10.2112	6.41359	4.2086	19.7836	32.1041	1507.72	100.845	150.643	-410.166	8.6493	75.662	96.9611	37.9735	55.5314	177.882	210.284	10.381	1.65865	0.95607	1.52758	7.66417e+08	13.5449	0.284714	0.325609	10.7124	1.7116	0.98877	0.157983	1.19615	0.191117	4.11621e+08
766	-96.8	30.81	739.721	2331.95	24.4569	25.6797	0.065466	20	1.7	6.2	21	27.1837	Electricity Generation	1.31716e+10	Odessa-Ector Generating Station	TX	0.0493192	2.27079	10.1995	6.41371	4.21005	19.7837	32.1056	1140.91	79.5876	166.876	-393.846	24.8828	56.9529	75.3066	34.9716	46.0094	194.116	226.518	13.6934	1.85116	0.783908	1.05973	7.48692e+08	18.2897	0.226787	0.259362	14.0207	1.8954	0.814677	0.110133	1.87312	0.253219	4.02147e+08
1009	-81.3	29.19	473.87	5734.96	29.2246	30.6859	0.0503707	240	0	0	0	31.6051	Electricity Generation	7.24768e+09	HOG BAYOU ENERGY CENTER	AL	0.131916	0.488068	10.0466	6.41535	4.228	19.7853	32.1235	1147.05	79.6965	167.442	-393.346	25.4486	57.372	74.1581	35.028	45.5168	194.682	227.084	7.63691	1.6116	1.02539	2.16385	5.76058e+08	13.2572	0.223333	0.255412	7.8862	1.66421	1.06069	0.223835	1.23568	0.260762	3.09334e+08
127	-112.4	33.69	846.661	3070	24.0071	25.2075	0.0733167	240	0	0	0	20.1336	Electricity Generation	2.41447e+10	Blythe Energy	CA	0.067233	100	10.2949	6.43343	4.2235	19.8034	32.119	1197.88	84.3299	175.834	-384.887	33.8403	60.8918	80.1791	36.45	48.1482	203.073	235.475	24.7081	2.9183	7.0153	8.28585	8.38476e+08	29.4678	0.259945	0.297283	25.0743	2.96155	7.75987	0.916527	59.948	7.08052	4.50264e+08
2355	-82.4	27.19	1218.26	34500	29.7722	31.2608	0.128417	1915	0	7.8	25.7	25.5633	Stationary Combustion	1.93939e+10	TROPICANA MANUFACTURING CO INC	FL	0.830097	0.445386	10.2309	6.43892	4.20362	19.8089	32.0992	1718.74	117.532	181	-379.813	39.0063	90.2121	113.05	42.7421	62.5949	208.239	240.641	21.7143	1.7824	18.0667	14.8299	1.46862e+09	14.7855	0.368157	0.421038	22.5064	1.84742	18.7298	1.53742	19.1357	1.57074	7.86371e+08
1739	-98.8	28.94	1466.88	24602	25.8806	27.1746	0.132906	2000	0	8.8	0	28.7143	Electricity Generation	2.90338e+10	W A PARISH	TX	0.589854	11.0304	10.2765	6.4497	4.21309	19.8197	32.1086	1543.77	112.162	229.887	-330.866	87.893	84.7548	105.942	45.2804	59.4638	257.126	289.528	31.63	2.15628	19.7277	13.4487	1.51996e+09	20.8098	0.398449	0.45568	32.4127	2.20963	20.33	1.38594	30.7371	2.0954	8.14013e+08
576	-93	31.81	924.371	4315.89	23.8786	25.0725	0.0797261	12	0	0	0	8.57745	Stationary Combustion	1.31921e+10	GORDON COMPRESSOR SITE	TX	0.097473	0.376963	10.1827	6.45474	4.24043	19.8247	32.136	947.861	69.5686	145.387	-415.327	3.39338	48.3131	64.825	31.5496	41.4064	172.626	205.028	13.8181	1.49486	1.36884	1.48083	9.11777e+08	15.1551	0.208145	0.238042	14.2164	1.53795	1.41062	0.152603	1.62456	0.175747	4.8966e+08
3018	-98.9	26.31	519.194	10200	29.0765	30.5304	0.0542498	240	0	7.93	29	34.262	Electricity Generation	1.26095e+10	MANATEE	FL	0.240291	100	10.1283	6.46299	4.27082	19.833	32.1664	1203.56	84.2376	180.241	-380.546	38.2471	61.2692	79.9175	36.227	48.045	207.48	239.882	13.2036	2.54309	7.1344	13.7413	6.2042e+08	21.2817	0.252014	0.288212	13.5082	2.60176	7.73664	1.49013	46.321	8.92172	3.32895e+08
1897	-97.3	28.69	631.521	12051	26.1598	27.4677	0.0595549	240	0	0	0	3.15188	Electricity Generation	1.10747e+10	MULBERRY COGENERATION FACILITY	FL	0.285218	2.27587	10.1463	6.47304	4.27501	19.843	32.1706	1167.25	81.4033	170.464	-390.296	28.4707	58.795	75.0967	35.4637	45.9241	197.704	230.106	11.5618	1.83079	3.39662	5.37848	6.81092e+08	16.9754	0.234529	0.268216	11.901	1.8845	3.50662	0.555266	4.47097	0.707969	3.65581e+08
865	-94.9	30.56	656.331	4495	24.7006	25.9356	0.0586306	328	1	8	22.3	4.82955	Stationary Combustion	9.67969e+09	MOBILE BAY NGL RECOVERY PLANT	AL	0.10182	0.796784	10.1501	6.48417	4.28706	19.8542	32.1826	973.332	71.5733	149.306	-411.425	7.31221	50.0747	66.7537	32.2238	42.2562	176.545	208.947	10.1383	1.5447	1.0664	1.62479	6.70521e+08	15.1201	0.218674	0.250084	10.4306	1.58924	1.10075	0.167713	1.4333	0.218381	3.6009e+08
128	-112.8	33.56	742.911	3240	25.0676	26.321	0.0671567	240	0	0	0	21.1693	Electricity Generation	1.92146e+10	Comanche (8059)	OK	0.0713592	100	10.2732	6.48465	4.27955	19.8546	32.1751	1185.72	83.3134	173.933	-386.787	31.939	60.0514	78.6252	36.0337	47.4658	201.172	233.574	19.7339	2.6563	6.31245	8.49692	7.68029e+08	25.6943	0.251709	0.287864	20.0694	2.70146	6.99601	0.941702	54.8006	7.37648	4.12445e+08
643	-96.9	31.31	1143.42	10151	23.8246	25.0158	0.0972091	2000	0	7.2	0	18.5069	Stationary Combustion	2.10524e+10	TENASKA GATEWAY GENERATING STATION	TX	0.239102	2.9517	10.3137	6.49034	4.26655	19.8603	32.1621	1408.46	101.457	208.931	-351.779	66.9374	75.4262	98.0156	41.4628	55.9766	236.17	268.572	21.974	1.92177	5.46356	4.77825	1.11172e+09	19.7658	0.343345	0.392662	22.5253	1.96999	5.62338	0.491802	7.66424	0.670289	5.96537e+08
1713	-99.1	28.94	616.461	4102	25.9017	27.1967	0.0577974	255	0	6.47	25.5	12.5004	Electricity Generation	1.25072e+10	W A PARISH	TX	0.0922816	39.1895	10.2219	6.49141	4.29519	19.8614	32.1907	1169.86	81.8276	171.274	-389.477	29.2807	58.9654	77.5185	35.6212	46.9855	198.514	230.916	12.9537	2.10131	2.84949	4.62234	6.60992e+08	19.5974	0.239317	0.273692	13.2413	2.14795	3.09846	0.502621	19.2216	3.11806	3.54958e+08
1895	-98.6	28.69	615.061	2374	26.3091	27.6246	0.0587663	400	0	8.2	27.3	32.7419	Electricity Generation	1.23908e+10	BAYSIDE POWER STATION	FL	0.0503398	11.0304	10.154	6.49304	4.29578	19.863	32.1913	1179.89	82.6097	200.461	-360.295	58.4677	59.6373	78.1659	35.9985	47.2707	227.701	260.103	12.8563	2.09025	1.12056	1.82186	6.72073e+08	19.1293	0.243447	0.278415	13.1489	2.13783	1.19906	0.19495	5.81423	0.94531	3.60987e+08
746	-96.9	30.94	725.029	2331.95	24.3798	25.5988	0.0639251	25	0	7.5	21	30.4781	Electricity Generation	1.29803e+10	Odessa-Ector Generating Station	TX	0.0493192	2.27079	10.254	6.50165	4.29936	19.8716	32.1949	1142.01	79.6945	167.066	-393.652	25.0728	57.0252	75.3341	35.0199	46.0208	194.306	226.708	13.4899	1.8606	0.771316	1.06384	7.31071e+08	18.4522	0.227459	0.26013	13.8096	1.9047	0.801368	0.110529	1.83489	0.253078	3.92681e+08
516	-111.6	32.06	780.181	2210	23.8564	25.0492	0.0675434	240	0	0	0	56.3687	Electricity Generation	1.8741e+10	UNION POWER STATION	AR	0.0463592	100	10.2884	6.50389	4.29846	19.8739	32.194	1183.14	82.9683	173.344	-387.395	31.3507	59.8378	78.7606	36.0329	47.5287	200.584	232.986	19.2727	2.47029	5.82596	7.46745	7.7245e+08	24.9501	0.249939	0.285839	19.6097	2.51349	6.5059	0.833896	54.5935	6.99755	4.14886e+08
2790	-99.6	29.06	646.266	2214.84	25.4338	26.7055	0.0596395	49	5.3	6.8	26.5	40.6584	Electricity Generation	1.43808e+10	W A PARISH	TX	0.0464767	9.53079	10.1894	6.5123	4.31414	19.8823	32.2097	1148.23	80.0511	171.945	-388.804	29.9509	57.4443	75.848	35.1514	46.2517	199.184	231.586	14.8526	2.29822	1.10539	1.71043	6.82059e+08	21.7761	0.231735	0.265021	15.1499	2.34422	1.17513	0.181834	5.22208	0.808038	3.66348e+08
1634	-82	28.19	475.57	2840	28.1713	29.5798	0.0489642	240	0	0	0	13.1113	Stationary Combustion	7.40637e+09	MOSAIC FAUSTINA FACILITY	LA	0.0616505	0.850795	10.0684	6.52464	4.3392	19.8946	32.2347	1144.31	79.4809	167.001	-393.795	25.0076	57.2018	75.5025	35.0296	46.1085	194.241	226.642	7.7942	1.63892	0.510938	1.07437	5.59973e+08	13.9189	0.223194	0.255253	8.03689	1.68995	0.529999	0.111445	0.826602	0.173813	3.00778e+08
1621	-81	28.31	410.152	8220	30.9225	32.4686	0.0459676	240	0	0	0	17.4636	Electricity Generation	7.53212e+09	COTTONWOOD ENERGY PROJECT	TX	0.192233	0.605994	10.0266	6.55645	4.37545	19.9265	32.271	1155.65	80.3489	168.749	-392.05	26.7558	57.98	76.6485	35.2095	46.6122	195.989	228.391	7.87365	1.91969	1.53392	3.73987	5.25702e+08	14.9774	0.227408	0.260072	8.10031	1.97495	1.58022	0.385276	1.77843	0.433602	2.82201e+08
1631	-100	29.06	665.131	4860.1	25.4538	26.7266	0.0611553	295	6.1	6.8	26.6	72.1039	Electricity Generation	1.45112e+10	W A PARISH	TX	0.110682	9.53079	10.2473	6.55931	4.35966	19.9293	32.2552	1185.79	83.0844	173.683	-387.064	31.6893	60.0048	78.5221	35.9494	47.4255	200.922	233.324	14.9751	2.25145	2.08311	3.13189	6.99394e+08	21.4115	0.247198	0.282705	15.2792	2.29717	2.17395	0.326846	6.3223	0.950535	3.75528e+08
2580	-99.3	27.69	542.11	2683.27	27.6518	29.0344	0.0544526	748	3.7	8.8	23.4	15.9599	Stationary Combustion	1.2634e+10	J K SPRUCE	TX	0.0578464	10.3795	10.2104	6.55956	4.36708	19.9296	32.2626	1226.51	86.4158	184.775	-375.994	42.781	62.8716	81.7036	37.0205	48.8259	212.014	244.416	13.0613	2.40934	1.16829	2.15508	6.22739e+08	20.974	0.264959	0.303016	13.332	2.45928	1.23953	0.228649	5.26334	0.970898	3.34469e+08
2577	-99.1	27.69	567.971	2683.27	27.5243	28.9005	0.0567776	1001	6.1	9.1	24	20.7401	Stationary Combustion	1.33746e+10	J K SPRUCE	TX	0.0578464	10.3795	10.2348	6.56506	4.36993	19.9351	32.2655	1259.19	89.1089	204.722	-356.046	62.7282	65.1225	84.2434	38.2376	49.9408	231.961	264.363	13.82	2.43322	1.2298	2.16526	6.49329e+08	21.2835	0.27957	0.319726	14.1023	2.48292	1.30408	0.229604	5.49969	0.968305	3.48749e+08
912	-94.9	30.44	707.781	6162.06	24.876	26.1199	0.0635474	2000	0	5.68	0	9.83863	Electricity Generation	1.05627e+10	J R KELLY	FL	0.142283	0.401577	10.2747	6.56681	4.3649	19.9368	32.2604	1139.13	79.3795	166.571	-394.162	24.5771	56.8476	74.982	34.8675	45.8687	193.81	226.212	11.0501	1.56123	1.59088	2.2477	7.26751e+08	15.2048	0.22302	0.255054	11.3664	1.60593	1.63839	0.231482	1.82001	0.257144	3.90215e+08
1353	-99.3	29.44	785.081	2829	24.2652	25.4784	0.0690449	1009	0	7.6	0	48.603	Electricity Generation	1.57123e+10	W A PARISH	TX	0.0613835	4.10697	10.3243	6.57135	4.36469	19.9413	32.2602	1261.08	89.3609	185.577	-375.163	43.5837	65.2247	74.4346	34.6866	45.6298	212.817	245.219	16.255	2.07049	1.20487	1.53471	7.89622e+08	20.5858	0.280677	0.320993	16.5993	2.11434	1.25388	0.159714	3.27266	0.416856	4.24095e+08
2579	-99.1	27.69	565.37	2683.27	27.5243	28.9005	0.0565177	1001	6.1	9.1	24	22.9735	Stationary Combustion	1.33134e+10	J K SPRUCE	TX	0.0578464	10.3795	10.2469	6.59107	4.39623	19.9611	32.2918	1259.28	89.1137	192.098	-368.669	50.1046	65.1266	84.2431	38.2394	49.9407	219.338	251.739	13.7567	2.43322	1.22417	2.16526	6.46356e+08	21.2835	0.279595	0.319755	14.0377	2.48292	1.29811	0.229604	5.47451	0.968305	3.47152e+08
1117	-97.3	30.06	756.994	2627	24.6098	25.8403	0.0674715	289	0	6.9	0	10.9613	Stationary Combustion	1.40962e+10	SAN JACINTO COUNTY PEAKING FACILITY	TX	0.0564806	3.99788	10.3466	6.60202	4.39665	19.972	32.2922	1169.87	81.9357	171.391	-389.341	29.3972	58.9678	77.4645	36.0453	46.9585	198.63	231.032	14.6305	1.93271	1.02332	1.35183	7.71628e+08	18.9605	0.239804	0.274248	14.9673	1.97721	1.06888	0.141201	2.98934	0.394896	4.14449e+08
1432	-98.1	29.31	651.021	2814.16	25.1771	26.436	0.0594259	79	4.3	7.1	26.7	9.20549	Electricity Generation	1.25541e+10	HAYS ENERGY PROJECT	TX	0.0610232	2.1097	10.2387	6.6058	4.40786	19.9758	32.3034	1147.42	80.029	167.797	-392.948	25.8034	57.4198	75.9325	35.2016	46.2882	195.036	227.438	13.0225	2.00033	0.886233	1.3613	6.79616e+08	19.1616	0.229682	0.262673	13.3187	2.04583	0.916637	0.1408	1.8092	0.277903	3.65019e+08
1946	-98.9	28.56	606.279	2594	26.4238	27.745	0.0581703	1000	0	7.24	29	28.4261	Electricity Generation	1.26834e+10	W A PARISH	TX	0.0556796	13.6732	10.2955	6.60737	4.41074	19.9774	32.3063	1249.03	88.2887	198.982	-361.777	56.9887	64.4132	84.1559	37.6001	49.9008	226.222	258.624	13.1421	2.16767	1.31259	2.16499	6.65257e+08	19.755	0.274206	0.313592	13.4317	2.21543	1.40694	0.232061	7.06965	1.16607	3.57314e+08
690	-97	31.06	983.54	5152	24.1063	25.3116	0.0853373	2000	0	7.7	60	26.3152	Electricity Generation	1.79128e+10	Odessa-Ector Generating Station	TX	0.117767	2.9517	10.305	6.61038	4.39268	19.9804	32.2882	1365.61	98.0581	202.172	-358.542	60.1787	72.4612	92.2885	40.4281	53.4631	229.412	261.814	18.5662	1.88769	2.37043	2.4101	9.75949e+08	19.0238	0.325567	0.37233	18.9922	1.931	2.44531	0.248623	4.23811	0.430903	5.24028e+08
3149	-98.9	27.19	476.19	5803.84	27.5742	28.953	0.0475165	98	4.5	7.9	30.2	0.96375	Stationary Combustion	1.06789e+10	GULFSTREAM STATION 420	FL	0.133588	5.46597	10.1278	6.62557	4.44223	19.9956	32.3378	963.316	70.5705	177.924	-382.853	35.9305	49.3874	65.7147	31.8663	41.8083	205.163	237.565	11.0342	2.31718	1.66371	3.49379	5.43416e+08	20.3052	0.216568	0.247675	11.2695	2.3666	1.7206	0.361326	3.56893	0.749476	2.91748e+08
1993	-96.8	28.56	507.8	2304.39	27.2459	28.6082	0.050313	295	2.4	6.3	22	6.72572	Petrochemical Production	8.67288e+09	SHELL DEER PARK REFINERY	TX	0.0486504	0.654027	10.1813	6.62835	4.44106	19.9984	32.3366	1124.88	78.9956	173.53	-387.236	31.536	56.6195	76.1059	35.2928	46.368	200.769	233.171	9.07378	1.78688	0.465473	0.916645	5.75398e+08	15.7696	0.227621	0.260316	9.32409	1.83617	0.480889	0.0947004	0.715184	0.14084	3.09074e+08
2974	-99.4	27.06	544.15	8641.98	28.1907	29.6002	0.0551488	459	0.6	8.2	28.8	37.1259	Stationary Combustion	1.3512e+10	J K SPRUCE	TX	0.202475	6.35043	10.2208	6.63489	4.44166	20.0049	32.3372	1227.55	86.3003	168.572	-392.202	26.5779	62.922	81.0403	36.8566	48.5356	195.811	228.213	14.0712	2.5859	3.10482	5.70582	6.30701e+08	22.3104	0.264045	0.301972	14.3787	2.64242	3.20129	0.58831	5.69256	1.04614	3.38465e+08
146	-113	33.56	1038.72	3230	24.1905	25.4	0.0906397	1820	0	9.1	0	14.9209	Electricity Generation	2.72061e+10	LAKE CATHERINE	AR	0.0711165	100	10.3789	6.64132	4.42072	20.0113	32.3163	1434.88	103.943	213.02	-347.7	71.0268	77.2535	100.852	46.7769	57.2237	240.26	272.662	27.9047	2.68645	8.60364	8.28292	1.03659e+09	26.9198	0.362946	0.415079	28.3575	2.73004	9.52597	0.917087	74.0456	7.12853	5.56657e+08
1269	-82	28.81	453.25	2510	27.7951	29.1849	0.0459943	240	0.2	7.3	24.5	3.93921	Lime Manufacturing	7.00228e+09	CHEMICAL LIME LTD MARBLE FALLS PLANT	TX	0.0536408	1.42397	10.0922	6.65937	4.47828	20.0294	32.3738	1046.13	74.5017	156.215	-404.569	14.2218	52.8428	65.3101	31.8756	41.6319	183.455	215.857	7.36817	1.62563	0.443063	0.977524	5.26008e+08	14.0077	0.215693	0.246674	7.59649	1.676	0.461756	0.101877	0.928082	0.204761	2.82543e+08
48	-119.8	35.44	764.441	7807	24.4908	25.7153	0.0668312	460	0	8.3	0	6.02984	Petroleum and Natural Gas Systems	1.6966e+10	EPNG Station 6210 Bondad	CO	0.182209	100	10.3523	6.66321	4.45842	20.0332	32.354	1037.12	76.8777	159.468	-401.231	17.4743	54.4761	81.3097	35.2044	48.6406	186.707	219.109	17.657	2.3098	8.09775	10.593	7.64306e+08	23.102	0.252408	0.288663	18.0321	2.35886	8.81913	1.15367	56.3631	7.37311	4.10196e+08
806	-97.1	30.69	708.611	2841.71	24.4721	25.6957	0.0626961	33	7.5	7	24.1	19.5033	Stationary Combustion	1.30237e+10	PUTNAM	FL	0.061692	2.27079	10.3229	6.6737	4.47255	20.0437	32.3681	1143.86	79.836	167.352	-393.37	25.3586	57.164	75.5918	35.0286	46.1346	194.592	226.993	13.5195	1.90789	0.938014	1.32374	7.17015e+08	18.8553	0.228415	0.261224	13.8328	1.9521	0.971343	0.137077	1.98493	0.280116	3.85107e+08
1110	-97.4	30.06	767.531	2627	24.7566	25.9945	0.0688089	525	0	6.8	0	13.0977	Stationary Combustion	1.44708e+10	SAN JACINTO COUNTY PEAKING FACILITY	TX	0.0564806	3.99788	10.3856	6.67911	4.47264	20.0491	32.3682	1195.29	84.0194	175.372	-385.36	33.3786	60.7202	79.4447	36.3988	47.8279	202.612	235.013	15.0155	1.95634	1.04898	1.36669	7.86923e+08	19.0813	0.250993	0.287045	15.3591	2.0011	1.09544	0.142722	3.05396	0.397894	4.22664e+08
1842	-98.5	28.81	622.621	2104	26.1851	27.4944	0.0592195	956	0	8.3	29.6	8.04474	Electricity Generation	1.25639e+10	BAYSIDE POWER STATION	FL	0.0437864	11.0304	10.2779	6.68441	4.48667	20.0544	32.3822	1238.37	87.4539	180.513	-380.243	38.5191	63.6983	82.8927	37.4207	49.3456	207.752	240.154	13.0347	2.09352	1.04776	1.68283	6.77256e+08	19.2463	0.269458	0.308162	13.3297	2.1409	1.12497	0.180682	5.77586	0.92767	3.63782e+08
419	-112.3	32.44	683.701	2015.07	24.7268	25.9631	0.0612929	240	0	0	0	53.0656	Electricity Generation	1.5911e+10	Hugo	OK	0.0416279	100	10.3377	6.70292	4.50311	20.0729	32.3986	1176.78	82.4721	172.39	-388.343	30.3964	59.402	78.245	35.8781	47.3013	199.629	232.031	16.3969	2.39826	5.15861	7.54513	7.00968e+08	23.3918	0.24606	0.281403	16.703	2.44303	5.77441	0.844581	49.4139	7.22741	3.76509e+08
1499	-99.3	29.31	648.091	2829	24.8494	26.0919	0.0583721	150	0	7.39	23.1	32.8334	Electricity Generation	1.31578e+10	W A PARISH	TX	0.0613835	4.10697	10.335	6.71804	4.5212	20.088	32.4167	1159.44	81.0017	169.65	-391.093	27.6559	58.2259	76.5999	35.4468	46.5808	196.889	229.291	13.6167	2.10105	1.01091	1.55983	6.67564e+08	20.3975	0.235795	0.269664	13.9077	2.14595	1.05234	0.162376	2.75907	0.425722	3.5854e+08
1531	-99.3	29.44	756.339	2829	24.2652	25.4784	0.0665171	1009	0	7.6	0	41.4717	Electricity Generation	1.5137e+10	W A PARISH	TX	0.0613835	4.10697	10.3937	6.72336	4.51879	20.0934	32.4143	1260.79	89.346	185.545	-375.195	43.5517	65.2119	84.0841	38.0454	49.866	212.785	245.187	15.6599	2.07049	1.16076	1.53471	7.60714e+08	20.5858	0.280598	0.320902	15.9916	2.11434	1.20798	0.159714	3.15285	0.416856	4.08569e+08
1867	-98.4	28.94	968.48	22006	25.845	27.1373	0.0879919	480	0	8.14	27.4	21.6853	Electricity Generation	1.92524e+10	BAYSIDE POWER STATION	FL	0.526845	11.0304	10.3451	6.7297	4.51062	20.0997	32.4062	1332	94.8442	181.168	-379.583	39.1747	70.1463	102.428	39.0973	57.9212	208.408	240.81	20.8227	2.15004	11.6791	12.0592	1.00631e+09	20.6922	0.306295	0.35029	21.3371	2.20315	12.0435	1.24355	18.936	1.95523	5.39117e+08
99	-112.8	33.69	727.481	3240	24.7475	25.9849	0.0649148	240	0	0	0	39.9774	Electricity Generation	1.80509e+10	Blythe Energy	CA	0.0713592	100	10.3734	6.7413	4.53814	20.1113	32.4337	1184.89	83.2387	173.79	-386.925	31.7967	59.975	78.5692	35.9884	47.4405	201.03	233.432	18.5539	2.55044	6.06453	8.33635	7.42389e+08	24.9922	0.250862	0.286894	18.8784	2.59504	6.72533	0.924469	52.9346	7.27642	3.9868e+08
1222	-81.1	28.81	429.24	2410	28.9633	30.4114	0.0454248	125	0	0	0	8.64744	Electricity Generation	6.5917e+09	CRIST ELECTRIC GENERATING PLANT	FL	0.0512136	0.473813	10.1197	6.74238	4.56218	20.1124	32.4577	1132.84	78.5563	165.217	-395.578	23.2229	56.4147	74.6301	34.8275	45.7253	192.456	224.858	6.95346	1.61995	0.371829	0.866249	5.19495e+08	13.385	0.217782	0.249063	7.17871	1.67242	0.385484	0.089806	0.538731	0.125508	2.7905e+08
765	-96.3	30.81	680.928	2039	24.5319	25.7585	0.0604894	54	0	5.3	23	14.8913	Stationary Combustion	1.14796e+10	Permian Basin	TX	0.0422087	1.80502	10.3523	6.75148	4.55246	20.1215	32.448	1141.38	79.6392	166.972	-393.751	24.9783	56.9973	75.2655	34.979	45.9914	194.211	226.613	11.9641	1.75704	0.584726	0.858719	6.91778e+08	17.2948	0.226433	0.258957	12.2666	1.80146	0.608241	0.0893252	1.38566	0.203495	3.71592e+08
1696	-82.3	28.19	469.26	8697.09	27.9433	29.3404	0.0476103	240	0	0	0	11.7368	Stationary Combustion	7.29132e+09	MOSAIC FAUSTINA FACILITY	LA	0.203813	0.793425	10.1965	6.7584	4.57493	20.1284	32.4705	1155.89	80.3786	168.821	-391.974	26.8276	58.0022	76.2186	35.2212	46.4228	196.061	228.462	7.71938	1.64501	1.60089	3.41153	5.44489e+08	14.1773	0.227457	0.260128	7.94851	1.69384	1.65129	0.351892	1.92008	0.409172	2.92281e+08
1341	-98.8	29.44	997.781	2560	24.4297	25.6512	0.0883882	863	0	6.9	24	14.7558	Stationary Combustion	1.89272e+10	KANEKA NORTH AMERICA LLC	TX	0.0548544	3.05015	10.4235	6.764	4.54459	20.134	32.4401	1233.73	87.1465	181.358	-379.381	39.3647	63.3714	82.4042	37.2284	49.1283	208.598	241	19.6264	1.96701	1.27347	1.27631	1.01084e+09	19.416	0.268057	0.30656	20.0674	2.0112	1.32418	0.132712	3.2436	0.325082	5.42933e+08
1964	-96.4	28.56	568.701	13011	28.0218	29.423	0.0572111	2000	0	7.5	0	10.5468	Petroleum Refining	9.2452e+09	VALERO REFINING HOUSTON REFINERY	TX	0.308519	0.654027	10.337	6.77392	4.57839	20.1439	32.4739	1309.38	93.78	177.403	-383.364	35.4095	69.349	91.1722	39.6569	52.9825	204.642	237.044	9.80434	1.72399	3.05215	5.36688	6.54287e+08	14.9848	0.304686	0.34845	10.1387	1.78278	3.15894	0.555467	3.42505	0.60226	3.51043e+08
1104	-97	30.06	709.491	3330	24.5802	25.8093	0.0631008	809	0	6.7	0	10.391	Stationary Combustion	1.31679e+10	MICHOUD	LA	0.0735437	1.93098	10.3871	6.77848	4.57696	20.1485	32.4725	1226.96	86.6157	180.344	-380.389	38.3499	62.9086	81.783	37.1446	48.8545	207.583	239.985	13.6628	1.92572	1.09379	1.54166	7.21643e+08	18.9329	0.264684	0.302702	13.9776	1.97009	1.12892	0.159117	1.99635	0.281378	3.87569e+08
1776	-98.9	28.81	591.331	3013	26.0035	27.3037	0.0557777	555	0	8.34	27.5	13.2571	Electricity Generation	1.18409e+10	W A PARISH	TX	0.0658495	39.1895	10.3398	6.78152	4.58752	20.1515	32.4831	1198.44	84.1677	252.73	-308.024	110.736	60.9373	79.7452	36.487	47.9636	279.969	312.371	12.2789	2.07648	2.40485	4.06685	6.37894e+08	19.2491	0.251779	0.287944	12.5565	2.12344	2.63806	0.446122	18.2	3.0778	3.42602e+08
2482	-98	27.94	514.37	2690.16	26.8687	28.2122	0.0502349	500	0	8.4	25	24.0708	Stationary Combustion	1.1037e+10	WILCOX GAS PLANT	TX	0.0580136	7.37599	10.2758	6.79821	4.61103	20.1682	32.5066	1003.23	73.8711	179.624	-381.148	37.6299	52.1189	68.9601	32.9051	43.2319	206.863	239.265	11.432	2.22251	0.933798	1.81542	5.74504e+08	19.8988	0.234204	0.267844	11.6816	2.27105	0.984722	0.191442	3.62271	0.7043	3.08566e+08
3253	-97.8	26.06	458.73	2047	28.8229	30.264	0.048244	246	0	0	0	24.6221	Stationary Combustion	9.41428e+09	VANDOLAH POWER PROJECT	FL	0.0424029	42.8054	10.2549	6.79962	4.61519	20.1696	32.5107	1155	80.378	244.938	-315.856	102.944	57.928	76.2788	35.2585	46.4489	272.177	304.579	9.7973	2.13574	1.92352	4.19314	5.51736e+08	17.7572	0.230469	0.263573	10.0366	2.18791	2.13693	0.465836	16.8408	3.67118	2.96367e+08
518	-111.6	32.06	708.361	2210	23.8564	25.0492	0.0613256	62	0	7.4	20	52.5863	Electricity Generation	1.70158e+10	UNION POWER STATION	AR	0.0463592	100	10.4079	6.8219	4.62206	20.1919	32.5176	1157.87	80.8846	169.388	-391.351	27.3943	58.0977	67.6149	35.4049	42.6357	196.627	229.029	17.4986	2.47029	5.28965	7.46745	7.01342e+08	24.9501	0.238799	0.2731	17.8045	2.51349	5.90699	0.833896	49.5679	6.99755	3.76694e+08
2991	-97.9	26.69	484.83	2249.29	28.4191	29.84	0.0502205	1015	0	7.82	29.2	40.1996	Electricity Generation	9.90524e+09	J T DEELY	TX	0.0473128	4.75327	10.2866	6.82572	4.63856	20.1957	32.5341	1233.92	86.8604	147.592	-413.196	5.5982	63.3588	82.183	37.5747	49.0399	174.831	207.233	10.3031	2.1251	0.661793	1.365	5.7434e+08	17.9391	0.265215	0.30331	10.5523	2.1765	0.697076	0.143777	2.3967	0.494338	3.08501e+08
524	-111.6	32.06	729.941	2210	23.8564	25.0492	0.0631939	240	0	0	0	52.2068	Electricity Generation	1.75342e+10	UNION POWER STATION	AR	0.0463592	100	10.4208	6.83148	4.62987	20.2015	32.5254	1182.97	82.96	173.326	-387.413	31.3326	59.8306	78.5955	36.0807	47.4563	200.566	232.967	18.0317	2.47029	5.4508	7.46745	7.22708e+08	24.9501	0.249894	0.285788	18.347	2.51349	6.08695	0.833896	51.0779	6.99755	3.8817e+08
900	-81.4	29.44	435.09	4310	28.9795	30.4285	0.0459122	240	0	0	0	13.9929	Electricity Generation	6.45308e+09	WASHINGTON COUNTY COGEN (OLIN)	AL	0.0973301	0.519657	10.199	6.85141	4.67046	20.2214	32.566	1143.31	79.446	166.919	-393.863	24.9259	57.1316	75.3217	34.9559	46.0268	194.159	226.561	6.81336	1.56596	0.680568	1.5642	5.25068e+08	12.9761	0.222007	0.253895	7.04099	1.61828	0.705068	0.162051	0.874917	0.201089	2.81995e+08
781	-96.8	30.94	682.987	2078	24.1968	25.4067	0.0598002	20	1.7	6.2	21	21.217	Electricity Generation	1.20647e+10	Odessa-Ector Generating Station	TX	0.0431553	2.27079	10.3964	6.85367	4.65535	20.2237	32.5509	1140.72	79.6016	166.881	-393.838	24.8874	56.9458	75.2458	34.9868	45.982	194.12	226.522	12.543	1.83649	0.640463	0.937739	6.83896e+08	18.3405	0.226959	0.259558	12.8422	1.88029	0.666738	0.097621	1.6336	0.239185	3.67354e+08
915	-92.8	30.31	678.351	4513	25.0358	26.2876	0.0615389	2000	0	8.7	0	7.10135	Stationary Combustion	8.9463e+09	BP AMERICAN PRODUCTION CO PASCAGOULA PLANT AND DESTIN PASCAGOULA COMPRESSOR STATION	MS	0.102257	0.445945	10.4372	6.88208	4.68204	20.2521	32.5776	1090.55	81.0312	167.653	-393.085	25.6597	58.162	86.1079	38.3525	50.754	194.893	227.295	9.43004	1.39014	0.984331	1.45107	7.03781e+08	13.3991	0.268067	0.306572	9.73665	1.43534	1.01838	0.150126	1.21374	0.178925	3.77964e+08
2298	-99.6	28.06	1230.48	13596	26.8864	28.2308	0.117835	1635	0	7.5	0	6.36382	Petroleum and Natural Gas Systems	2.82185e+10	PRAIRIE LEA CMP STN	TX	0.322718	10.3795	10.5997	6.89449	4.66251	20.2645	32.558	1226.73	92.165	163.985	-396.773	21.9913	67.5612	95.6208	41.5316	54.9337	191.224	223.626	29.7312	2.41623	10.488	8.52348	1.3476e+09	22.0623	0.332615	0.380391	30.3982	2.47043	10.822	0.879496	19.517	1.58612	7.22744e+08
1181	-97.1	29.94	659.351	2805	24.9041	26.1493	0.0594841	577	0	7.3	22	24.2619	Stationary Combustion	1.20562e+10	MICHOUD	LA	0.060801	2.20409	10.4125	6.89905	4.70106	20.2691	32.5966	1198.23	84.2204	175.79	-384.946	33.7967	60.9118	79.8686	36.4922	48.0146	203.03	235.432	12.5264	1.89981	0.857364	1.30032	6.80282e+08	18.4136	0.251576	0.287711	12.8232	1.94483	0.888304	0.134724	1.82173	0.276291	3.65381e+08
149	-112.4	33.56	676.721	3070	25.0132	26.2639	0.061065	330	0	7.2	0	9.88312	Electricity Generation	1.9461e+10	Blythe Energy	CA	0.067233	100	10.4521	6.91126	4.71169	20.2813	32.6072	1207.94	85.1518	177.407	-383.318	35.4131	61.596	71.5785	36.6114	44.3732	204.646	237.048	19.9312	2.94526	5.79943	8.56991	6.98362e+08	28.5399	0.263576	0.301435	20.2361	2.99031	6.41964	0.94864	49.8874	7.37193	3.75027e+08
3002	-97.9	26.44	470.84	2455.95	28.5191	29.945	0.0489515	984	2.6	8.2	27.7	32.6911	Electricity Generation	9.57326e+09	J T DEELY	TX	0.0523288	6.29155	10.3015	6.92705	4.74162	20.297	32.6372	1229.84	86.5218	164.084	-396.705	22.0909	63.085	82.0189	37.1433	48.9682	191.324	223.726	9.96008	2.11538	0.746108	1.58463	5.59827e+08	17.7913	0.26331	0.301131	10.2029	2.16696	0.789118	0.167598	2.98189	0.633312	3.00699e+08
2901	-99.1	27.44	630.321	6086.28	27.2734	28.6371	0.0620665	2000	2.5	8.5	32.3	29.0195	Stationary Combustion	1.55062e+10	J K SPRUCE	TX	0.140444	10.3795	10.4336	6.92851	4.72799	20.2985	32.6235	1418.04	102.126	181.203	-379.568	39.2089	76.0767	98.9371	41.8634	56.392	208.442	240.844	16.0221	2.54189	2.72066	4.3163	7.09816e+08	22.5722	0.34939	0.399575	16.4135	2.604	2.83872	0.450361	7.42287	1.17763	3.81046e+08
1285	-100.9	29.56	947.311	2266	24.2459	25.4582	0.0832239	240	0	0	0	55.66	Petroleum and Natural Gas Systems	2.24341e+10	PLAQUEMINE GAS PLANT	LA	0.0477184	100	10.4952	6.93819	4.72171	20.3082	32.6172	990.56	72.9829	151.903	-408.83	9.90974	51.2127	72.7198	32.5851	44.8757	179.143	211.545	23.09	2.43743	7.17941	7.57873	9.51778e+08	24.2599	0.232976	0.26644	23.5056	2.48129	8.01778	0.846372	67.2692	7.10106	5.11204e+08
1041	-97	30.19	593.591	3357	24.6668	25.9002	0.0529583	200	0	7.3	0	13.1826	Petroleum and Natural Gas Systems	1.1159e+10	TARGA MIDSTREAM SERVICES LLC - LOWRY GAS PROCESSING PLANT	LA	0.074199	1.93098	10.3992	6.94011	4.74944	20.3101	32.645	971.922	71.4755	149.065	-411.667	7.0713	49.9691	66.6767	32.2114	42.2225	176.304	208.706	11.5741	1.94985	0.933466	1.57257	6.0565e+08	19.1102	0.22101	0.252755	11.8383	1.99436	0.963122	0.162254	1.69112	0.284896	3.25272e+08
976	-101.8	30.19	1949.18	23268	23.8113	25.0018	0.160723	240	0	0	0	23.232	Petroleum and Natural Gas Systems	5.15102e+10	VIOSCA KNOLL 786 A	LA	0.557476	41.8483	10.4888	6.9452	4.70188	20.3152	32.5974	1193.22	89.5605	183.821	-376.897	41.8279	65.2316	84.2309	40.381	49.9266	211.061	243.463	55.111	2.82739	35.6348	18.2819	1.83809e+09	29.9828	0.323394	0.369845	56.0272	2.8744	36.7895	1.88743	84.5237	4.33637	9.84121e+08
1365	-99.1	29.44	657.581	2694	24.263	25.4761	0.057843	300	0	7.1	0	42.1346	Electricity Generation	1.29579e+10	W A PARISH	TX	0.0581068	4.10697	10.4905	6.94568	4.7494	20.3157	32.6449	1177.21	82.4689	172.437	-388.303	30.4436	59.4433	78.395	35.9006	47.3684	199.677	232.078	13.4138	2.03986	0.952913	1.44912	6.61513e+08	20.2774	0.243653	0.278651	13.7022	2.08373	0.993038	0.151014	2.68432	0.408212	3.55297e+08
1084	-90.9	30.06	778.307	2021.96	25.6144	26.8951	0.0725495	2000	0	6.87	0	6.9194	Stationary Combustion	9.63348e+09	APACHE NITROGEN PRODUCTS - PLANT	AZ	0.0417951	0.302084	10.5785	6.96059	4.75121	20.3306	32.6467	1257.11	88.8413	184.986	-375.763	42.992	64.9927	84.7212	37.9034	50.1471	212.225	244.627	10.2172	1.31275	0.443033	0.569227	8.29702e+08	12.3143	0.272299	0.311411	10.579	1.35923	0.460312	0.0591427	0.616365	0.0791931	4.457e+08
1535	-97.1	29.31	512.28	4371	25.3146	26.5803	0.0469584	51	0	7	0	5.55371	Stationary Combustion	9.11453e+09	MBI NGLP MONT BELVIEU PLANT	TX	0.0988107	0.860538	10.3206	6.97647	4.79394	20.3465	32.6895	953.476	69.8817	146.097	-414.653	4.10348	48.7037	65.0966	31.6932	41.532	173.336	205.738	9.47834	1.85022	0.966071	1.88582	5.37033e+08	17.6494	0.211314	0.241667	9.71196	1.89583	0.993124	0.193863	1.28077	0.250013	2.88392e+08
1216	-96.6	29.81	609.121	4500	24.9085	26.1539	0.05487	96	0	7.4	0	11.1269	Stationary Combustion	1.07436e+10	WATERFORD 1 & 2	LA	0.101942	1.34112	10.4756	6.98614	4.79318	20.3561	32.6887	1150.39	80.2786	168.288	-392.452	26.2945	57.6229	75.9982	35.2374	46.3162	195.528	227.929	11.1682	1.8335	1.19224	1.95732	6.27514e+08	17.7975	0.229824	0.262835	11.4415	1.87836	1.22733	0.201492	1.75113	0.287485	3.36975e+08
1396	-96.6	29.44	828.891	32984	25.195	26.4547	0.0726621	240	0	6.28	0	8.62772	Petroleum and Natural Gas Systems	1.38158e+10	MONT BELVIEU COMPLEX	TX	0.793301	1.34112	10.5382	6.99511	4.78584	20.3651	32.6814	1153.68	85.9165	177.498	-383.25	35.5048	62.5175	89.0674	39.3478	52.0552	204.738	237.14	15.401	1.85802	12.2888	14.8256	8.3099e+08	18.5333	0.295512	0.337958	15.8429	1.91134	12.6487	1.52598	13.34	1.60938	4.44723e+08
681	-96.8	31.06	680.941	2078	23.9853	25.1846	0.0590738	40	0	7.1	22	22.146	Electricity Generation	1.19243e+10	Odessa-Ector Generating Station	TX	0.0431553	2.27079	10.4697	7.00942	4.81184	20.3794	32.7074	1143.19	79.8239	167.29	-393.424	25.2967	57.1149	75.5815	35.0335	46.1287	194.53	226.932	12.3971	1.82058	0.63296	0.929538	6.75589e+08	18.35	0.22817	0.260943	12.6927	1.864	0.658922	0.0967665	1.61404	0.237031	3.62891e+08
143	-112.4	33.56	667.901	3070	25.0132	26.2639	0.0602691	330	0	7.2	0	14.1727	Electricity Generation	1.92074e+10	Blythe Energy	CA	0.067233	100	10.4948	7.00995	4.81117	20.38	32.7067	1208.11	85.1611	177.427	-383.298	35.4329	61.604	80.3022	36.4886	48.203	204.666	237.068	19.6714	2.94526	5.72385	8.56991	6.8926e+08	28.5399	0.263626	0.301492	19.9723	2.99031	6.33597	0.94864	49.2372	7.37193	3.7014e+08
169	-112.6	33.44	747.301	3240	23.9041	25.0993	0.0644336	436	8.5	7.7	24	17.4222	Electricity Generation	1.83525e+10	Comanche (8059)	OK	0.0713592	100	10.5652	7.02814	4.82541	20.3981	32.7209	1215.7	85.8239	178.672	-382.043	36.6782	62.1242	70.9248	33.5303	44.0844	205.911	238.313	18.8511	2.52256	6.05059	8.0966	7.36886e+08	25.5821	0.265224	0.303319	19.1731	2.56565	6.70645	0.897423	52.5727	7.03502	3.95721e+08
87	-114.8	33.56	648.041	5530	25.4603	26.7334	0.0592096	240	0	0	0	7.66416	Electricity Generation	1.85183e+10	JEFFERIES	SC	0.126942	100	10.4789	7.03698	4.8393	20.407	32.7348	1202.09	84.574	176.474	-384.254	34.4802	61.1944	79.903	36.4067	48.0283	203.713	236.115	19.0657	2.94206	6.74414	10.407	6.77143e+08	28.1562	0.259554	0.296836	19.3418	2.98466	7.35869	1.13553	49.4886	7.63665	3.63485e+08
1889	-99	28.69	570.748	2594	26.1848	27.4941	0.0542453	1000	0	7.24	29	18.8508	Electricity Generation	1.18921e+10	W A PARISH	TX	0.0556796	39.1895	10.4855	7.0394	4.84717	20.4094	32.7427	1249.74	88.3787	168.701	-392.054	26.7078	64.4721	83.5574	37.6374	49.6374	195.941	228.343	12.32	2.15857	2.23841	3.9219	6.20369e+08	19.8592	0.274773	0.31424	12.5901	2.2059	2.46255	0.431459	17.5976	3.08325	3.33204e+08
139	-112.9	33.56	633.891	3230	25.1353	26.3921	0.0574608	240	0	0	0	13.4321	Electricity Generation	1.67078e+10	LAKE CATHERINE	AR	0.0711165	100	10.5414	7.05186	4.85599	20.4219	32.7515	1186.52	83.3808	174.061	-386.661	32.0672	60.1145	78.4512	36.1525	47.3898	201.3	233.702	17.1516	2.70577	5.41595	8.54399	6.57142e+08	26.1003	0.252335	0.288579	17.4386	2.75104	6.00072	0.946649	46.9032	7.39926	3.52895e+08
2798	-100.3	29.19	1527.85	27693	24.8051	26.0453	0.130692	240	0	0	0	107.363	Electricity Generation	3.50819e+10	W A PARISH	TX	0.664879	10.188	10.6044	7.0569	4.82096	20.4269	32.7165	1420.45	102.028	171.293	-389.451	29.2992	76.1648	93.5019	45.4853	54.0011	198.532	230.934	38.433	2.51549	26.5256	17.3614	1.49465e+09	25.7138	0.346237	0.395969	39.1996	2.56567	27.1621	1.77779	36.6052	2.39586	7.99688e+08
1888	-98.9	28.69	607.421	2538	26.2709	27.5844	0.0579386	2000	0	8.61	27.1	18.2637	Electricity Generation	1.24784e+10	W A PARISH	TX	0.0543204	39.1895	10.5577	7.06986	4.87348	20.4399	32.769	1356.23	97.1192	170.839	-389.918	28.8457	71.8223	91.6636	40.3659	53.1964	198.079	230.481	12.936	2.12966	2.36083	3.88664	6.62607e+08	19.5229	0.321263	0.367408	13.2244	2.17715	2.59984	0.428014	18.7655	3.08938	3.55894e+08
1783	-81.3	27.94	408.666	2080	28.9067	30.352	0.0432209	240	0	0	0	27.0914	Electricity Generation	6.48374e+09	COTTONWOOD ENERGY PROJECT	TX	0.0432039	0.605994	10.2785	7.07404	4.89746	20.444	32.793	1142.48	79.2921	171.097	-389.703	29.1039	57.0612	75.3809	34.9309	46.0559	198.337	230.739	6.82845	1.67091	0.314143	0.768702	4.9429e+08	13.8147	0.222135	0.254041	7.04269	1.72333	0.325977	0.0797661	0.512472	0.125401	2.65518e+08
1120	-94.1	29.94	487.91	2020	25.9514	27.249	0.0460225	20	0	0	0	4.89594	Hydrogen Production	7.07548e+09	AIR PRODUCTS & CHEMICALS INC - GEISMAR SMR	LA	0.0417476	0.367983	10.3498	7.08589	4.90475	20.4559	32.8003	970.949	70.386	147.432	-413.317	5.43827	49.1578	64.2111	31.4124	41.1432	174.671	207.073	7.44484	1.52586	0.323171	0.662358	5.2633e+08	14.1448	0.205718	0.235267	7.6743	1.57289	0.334418	0.0685409	0.455006	0.0932561	2.8273e+08
2357	-97.4	28.06	776.421	36000	27.6416	29.0236	0.0749091	2000	0	6.4	0	25.315	Petroleum and Natural Gas Systems	1.45104e+10	COPANO PROCESSING HOUSTON CENTRAL GAS PLT	TX	0.866505	3.3567	10.6004	7.09855	4.88765	20.4686	32.7832	1344.31	101.371	164.197	-396.579	22.2033	75.6573	94.9237	41.0999	54.631	191.436	223.838	16.0909	2.07244	14.1265	18.1943	8.56688e+08	18.7827	0.378086	0.432393	16.5409	2.1304	14.5404	1.87275	16.3245	2.10253	4.5856e+08
497	-112.5	32.06	733.401	4880	23.8104	25.0009	0.0629773	240	0	0	0	76.984	Electricity Generation	2.01152e+10	Hugo	OK	0.111165	100	10.5661	7.1012	4.89982	20.4712	32.7954	1205.72	84.7438	176.822	-383.921	34.8286	61.3753	79.8593	36.3754	48.0118	204.062	236.463	20.7567	2.8302	6.90646	9.41704	7.20231e+08	28.8195	0.261481	0.299039	21.0625	2.87189	7.55733	1.03045	52.3724	7.14103	3.86652e+08
814	-96.5	30.69	632.521	2078	24.3392	25.5562	0.0557316	40	0	0	0	5.65167	Stationary Combustion	1.14062e+10	Permian Basin	TX	0.0431553	1.80502	10.5332	7.10222	4.90826	20.4722	32.8038	1142.26	79.7265	167.127	-393.596	25.1331	57.0679	75.4221	35.0276	46.0602	194.366	226.768	11.8515	1.8737	0.58492	0.924745	6.37367e+08	18.5945	0.227795	0.260515	12.1302	1.91776	0.606847	0.095941	1.3231	0.209179	3.42359e+08
2960	-99.4	27.19	463.26	5238	28.1437	29.5509	0.0471543	280	0	8.4	0	25.607	Stationary Combustion	1.14238e+10	J K SPRUCE	TX	0.119854	6.35043	10.3915	7.10873	4.92592	20.4787	32.8215	1180.89	82.6086	163.153	-397.619	21.1596	59.7136	77.9348	35.8642	47.1721	190.393	222.794	11.7775	2.54231	1.63027	3.51911	5.39274e+08	21.8396	0.244675	0.27982	12.0113	2.59277	1.68764	0.364296	3.81877	0.824324	2.89536e+08
1861	-81.8	27.81	434.05	3978.34	28.7867	30.226	0.045657	1392	0	0	24	9.43895	Stationary Combustion	6.94482e+09	SAM SEYMOUR	TX	0.0892802	0.850795	10.3497	7.13973	4.95918	20.5097	32.8547	1235.31	86.8262	198.366	-362.439	56.3727	63.4855	82.4634	37.26	49.1661	225.606	258.008	7.30198	1.68229	0.680289	1.56731	5.2215e+08	13.9845	0.262331	0.300012	7.52781	1.73432	0.70427	0.162255	0.980808	0.225966	2.80431e+08
1426	-99.1	29.31	647.891	2829	24.9401	26.1871	0.0585697	1009	0	7.6	0	40.8742	Electricity Generation	1.29768e+10	W A PARISH	TX	0.0613835	4.10697	10.5262	7.14465	4.9476	20.5147	32.8431	1255.76	88.9108	184.742	-376.001	42.7485	64.8656	85.1596	37.7767	50.3386	211.982	244.383	13.4376	2.07406	1.00051	1.54426	6.69824e+08	20.0614	0.277831	0.317737	13.7296	2.11913	1.04209	0.160843	2.75459	0.425164	3.59755e+08
1391	-97.4	29.56	536.816	6313.61	25.0859	26.3402	0.0485676	191	0	8.2	24.5	20.2106	Petroleum and Natural Gas Systems	9.9848e+09	DISCOVERY PRODUCER SERVICES LLC - LAROSE GAS PROCESSING PLANT	LA	0.145961	0.97372	10.4678	7.15104	4.96619	20.521	32.8617	975.299	71.6648	149.523	-411.22	7.52957	50.195	66.6519	32.1785	42.2137	176.763	209.164	10.3495	1.92794	1.54516	2.87838	5.55437e+08	18.6331	0.221414	0.253217	10.6663	1.98696	1.59604	0.297316	1.93258	0.360009	2.98196e+08
86	-114.6	33.69	598.371	2160	25.05	26.3026	0.0542088	38	0	7.3	23	2.77405	Electricity Generation	1.65157e+10	JEFFERIES	SC	0.0451456	100	10.5609	7.16081	4.96862	20.5308	32.8642	1154.69	80.7571	169.067	-391.658	27.0732	57.9281	76.404	35.3871	46.4916	196.306	228.708	16.9421	2.83137	4.72357	7.89405	6.19951e+08	27.3281	0.239506	0.273907	17.213	2.87665	5.2689	0.880541	43.8624	7.3303	3.32974e+08
177	-111.8	33.56	781.281	2040	24.2237	25.4349	0.068457	1000	9.5	7.4	24	13.3405	Electricity Generation	2.0842e+10	WASHINGTON COUNTY POWER, LLC	GA	0.042233	100	10.6645	7.17565	4.96947	20.5457	32.865	1304.81	93.1932	192.614	-368.108	50.6206	68.2784	87.809	39.0352	51.4979	219.854	252.256	21.382	2.73678	5.90224	7.55457	7.82899e+08	27.3113	0.306071	0.350033	21.7242	2.78059	6.59002	0.843489	55.3283	7.08174	4.205e+08
1547	-99.8	29.19	598.431	4406	24.9962	26.246	0.0540467	230	3.5	7.8	28.3	68.8455	Electricity Generation	1.34063e+10	W A PARISH	TX	0.0996602	4.52504	10.5677	7.17952	4.98754	20.5495	32.8831	1179.97	82.6319	172.793	-387.952	30.7991	59.6068	77.8671	35.8462	47.1374	200.032	232.434	13.8181	2.30906	1.55572	2.59966	6.18098e+08	22.3559	0.245539	0.280808	14.0871	2.35401	1.60652	0.268456	3.34722	0.559332	3.31892e+08
522	-111.3	32.19	676.791	2570	23.9108	25.1063	0.0586251	240	0	0	0	22.9802	Electricity Generation	1.69113e+10	UNION POWER STATION	AR	0.0550971	100	10.5514	7.18155	4.98444	20.5515	32.88	1185.64	83.243	173.83	-386.904	31.8368	60.0438	78.8318	36.1106	47.5591	201.07	233.472	17.3692	2.56641	5.23821	7.73978	6.70458e+08	25.9065	0.251958	0.288149	17.6618	2.60964	5.83062	0.86151	47.5662	7.0282	3.60083e+08
1994	-98.5	28.56	454.91	4825	26.5467	27.874	0.0437205	200	0	8.4	0	16.2563	Stationary Combustion	9.1352e+09	NORTH TERREBONNE GAS PLANT	LA	0.10983	10.9862	10.376	7.19944	5.02204	20.5694	32.9176	971.537	71.2989	168.097	-392.664	26.1038	49.9394	68.1868	32.6705	42.8907	195.337	227.739	9.46976	2.08168	1.39083	3.05737	5.00004e+08	18.9394	0.219661	0.251213	9.68689	2.12941	1.46182	0.321342	4.88061	1.07287	2.68485e+08
1984	-99	28.56	549.78	2594	26.4107	27.7312	0.0527139	1000	0	7.24	29	31.4907	Electricity Generation	1.17881e+10	W A PARISH	TX	0.0556796	13.6732	10.5363	7.20018	5.00981	20.5702	32.9053	1252.81	88.6067	167.62	-393.138	25.6268	64.6715	83.7581	37.7023	49.726	194.86	227.262	12.2034	2.21969	1.20584	2.1933	6.02855e+08	20.2427	0.276251	0.315931	12.4658	2.26741	1.29134	0.234882	6.42285	1.16826	3.23796e+08
2574	-99.1	27.69	515.14	2683.27	27.5243	28.9005	0.0514964	1366	0	8.33	38.3	28.1694	Stationary Combustion	1.21306e+10	J K SPRUCE	TX	0.0578464	10.3795	10.5376	7.2002	5.01136	20.5702	32.9069	1303.43	92.7435	190.817	-369.95	48.8239	68.1683	87.8986	38.9803	51.5454	218.057	250.459	12.5345	2.43322	1.11541	2.16526	5.88931e+08	21.2835	0.298999	0.341946	12.7905	2.48292	1.18278	0.229604	4.98813	0.968305	3.1631e+08
1027	-97.5	30.19	706.441	13519.2	24.6422	25.8743	0.0619282	56	5.6	6.6	26.3	6.19727	Stationary Combustion	1.35596e+10	SANDOW STATION	TX	0.320854	3.99788	10.5848	7.20118	5.00084	20.5712	32.8964	1207.94	84.869	177.373	-383.359	35.3789	61.6001	79.463	33.2183	47.8358	204.612	237.014	14.2974	2.02387	4.76819	6.74959	7.08233e+08	20.1875	0.254298	0.290825	14.6511	2.07393	4.90571	0.694427	6.66588	0.943587	3.79857e+08
2903	-98.8	27.44	544.56	3079.37	26.8725	28.2162	0.0531982	318	7.1	7	26.7	15.7527	Stationary Combustion	1.22709e+10	GULFSTREAM STATION 420	FL	0.0674605	10.3795	10.5553	7.20252	5.01155	20.5725	32.9071	986.453	72.4839	192.64	-368.136	50.6464	50.9693	67.6061	32.4597	42.6384	219.879	252.281	12.6856	2.32951	1.25901	2.31198	6.08394e+08	20.8509	0.227478	0.260152	12.9497	2.37802	1.33111	0.244437	5.26203	0.96629	3.26748e+08
1791	-98.1	28.81	489.39	4212.56	26.1536	27.4613	0.0463606	280	0	7.9	0	1.41387	Petroleum and Natural Gas Systems	9.54004e+09	KATY COMPRESSOR STATION	TX	0.094965	2.19333	10.4304	7.20516	5.02353	20.5752	32.9191	978.04	71.8768	167.772	-392.984	25.7783	50.4031	67.0002	32.3507	42.3689	195.011	227.413	9.89851	2.02262	1.01427	2.07251	5.30197e+08	18.6695	0.222638	0.254617	10.129	2.06972	1.04614	0.213765	1.76996	0.361666	2.84721e+08
1127	-97	29.94	571.531	2060	24.8387	26.0807	0.0514904	35	0	7.2	0	5.66443	Stationary Combustion	1.03077e+10	MICHOUD	LA	0.0427184	2.20409	10.5665	7.22214	5.0333	20.5921	32.9288	1140.05	79.4721	166.696	-394.041	24.7019	56.9148	75.2691	34.9475	45.9955	193.935	226.337	10.7188	1.87545	0.540768	0.946174	5.88862e+08	18.2025	0.226185	0.258673	10.9758	1.92043	0.562919	0.0984932	1.37098	0.239878	3.16307e+08
2166	-98	28.31	498.18	2236	26.2109	27.5215	0.047485	400	2.5	7.64	26.8	14.0032	Stationary Combustion	1.00045e+10	OLD OCEAN GAS PLANT	TX	0.0469903	12.3906	10.4767	7.22341	5.04008	20.5934	32.9356	988.482	72.6964	166.271	-394.494	24.2778	51.1111	67.9494	32.5434	42.7871	193.511	225.913	10.381	2.08378	0.917473	1.84165	5.43055e+08	19.1159	0.227476	0.26015	10.6173	2.13121	0.98647	0.198015	5.17559	1.0389	2.91693e+08
208	-115.1	32.69	573.891	2080	25.5252	26.8015	0.0530656	240	0	0	27.8	29.5365	Stationary Combustion	1.50986e+10	CALEDONIA	MS	0.0432039	100	10.5691	7.22453	5.03372	20.5945	32.9293	1181.18	82.8534	173.103	-387.634	31.1096	59.7299	78.4357	35.8801	47.3857	200.343	232.744	15.5173	2.70387	4.54563	7.92072	6.06877e+08	25.5691	0.24945	0.28528	15.7821	2.75003	5.07905	0.885021	42.8597	7.46827	3.25961e+08
2969	-98.9	27.06	416.8	2290.62	27.4975	28.8723	0.0417131	148	0.6	8.6	23.8	7.93661	Petroleum and Natural Gas Systems	9.6927e+09	MARKHAM GAS PROCESSING PLANT	TX	0.048316	5.46597	10.3615	7.22525	5.05132	20.5952	32.9469	963.814	70.6307	239.048	-321.729	97.0546	49.4148	66.3329	31.9284	42.0796	266.288	298.69	10.0216	2.40442	0.650709	1.5612	4.77047e+08	21.0077	0.217721	0.248994	10.2289	2.45414	0.683152	0.163904	2.30647	0.553376	2.56231e+08
2098	-98	28.44	643.531	21338	25.8343	27.1261	0.0585061	125	0	7.6	26.5	10.4692	Stationary Combustion	1.334e+10	EQUISTAR CHEMICALS LAPORTE COMPLEX	TX	0.510631	12.3906	10.5838	7.22736	5.03053	20.5974	32.9261	1125.49	82.7743	150.908	-409.854	8.91413	59.8178	84.9162	38.1082	50.2351	178.147	210.549	14.3971	2.23721	7.881	12.2465	6.69097e+08	21.5172	0.275057	0.314565	14.7371	2.29004	8.12441	1.26247	13.2725	2.06244	3.58465e+08
1209	-97.9	29.81	598.431	2421.5	24.6227	25.8539	0.053413	240	0	7.6	22	6.11566	Electricity Generation	1.15031e+10	SABINE	TX	0.0514928	1.09669	10.5805	7.22956	5.03832	20.5996	32.9339	1165.64	81.5706	170.702	-390.036	28.7087	58.6805	77.3794	35.6399	46.9221	197.942	230.344	11.9265	1.99296	0.656904	1.09771	6.1085e+08	19.5244	0.238278	0.272503	12.193	2.0375	0.676391	0.113027	1.09345	0.182719	3.281e+08
605	-97.1	31.31	728.771	2256	24.0081	25.2085	0.0632165	2000	0	7.4	0	14.3482	Stationary Combustion	1.36142e+10	CEMEX CONSTRUCTION MATERIALS SOUTH LLC	TX	0.0474757	2.9517	10.6519	7.23337	5.03174	20.6034	32.9273	1259.17	92.3792	190.016	-370.694	48.0223	67.5352	91.7681	40.2972	53.2339	217.255	249.657	14.1182	1.93727	0.806539	1.10671	7.22967e+08	19.5282	0.315249	0.36053	14.4347	1.9807	0.839925	0.115252	2.16847	0.297551	3.88328e+08
118	-112.8	33.69	656.531	3240	24.7475	25.9849	0.0585838	240	0	0	0	23.7962	Electricity Generation	1.62904e+10	Comanche (8059)	OK	0.0713592	100	10.5848	7.23933	5.04227	20.6093	32.9378	1184.23	83.205	173.718	-386.998	31.7239	59.9459	78.4416	35.9798	47.3845	200.957	233.359	16.7444	2.55044	5.47307	8.33635	6.69985e+08	24.9922	0.250681	0.286688	17.0372	2.59504	6.06942	0.924469	47.7719	7.27642	3.59798e+08
1266	-97.6	29.69	523.14	3379	24.8515	26.0941	0.0470833	340	0	7.9	0	6.01364	Stationary Combustion	9.66586e+09	LAGRANGE PLANT	TX	0.074733	0.981956	10.485	7.25071	5.06799	20.6207	32.9635	984.721	72.4948	151.043	-409.698	9.04926	50.8596	67.574	32.4731	42.618	178.282	210.684	10.0348	1.91819	0.783696	1.49806	5.38462e+08	18.6361	0.226112	0.25859	10.2695	1.96305	0.805779	0.154027	1.13492	0.216943	2.89188e+08
174	-112.6	33.44	701.051	3240	23.9041	25.0993	0.0604459	300	5.5	7.1	21	17.0153	Electricity Generation	1.72167e+10	Comanche (8059)	OK	0.0713592	100	10.6368	7.25077	5.05181	20.6208	32.9473	1195.76	84.176	175.545	-385.17	33.5515	60.7485	79.3665	36.4109	47.7903	202.785	235.186	17.6844	2.52256	5.67613	8.0966	6.91281e+08	25.5821	0.256414	0.293244	17.9865	2.56565	6.29139	0.897423	49.319	7.03502	3.7123e+08
182	-111.8	33.44	744.761	2040	24.4038	25.624	0.065737	1000	9.5	7.4	24	9.16482	Electricity Generation	2.06412e+10	WASHINGTON COUNTY POWER, LLC	GA	0.042233	100	10.692	7.26414	5.06025	20.6341	32.9558	1310.47	93.6697	193.504	-367.219	51.51	68.6731	88.2452	39.7865	51.6896	220.743	253.145	21.1589	2.84104	5.69418	7.64565	7.51792e+08	28.1447	0.30919	0.353601	21.4876	2.88517	6.35459	0.853239	53.156	7.13732	4.03789e+08
703	-96.8	31.06	626.398	2078	23.9853	25.1846	0.054342	40	0	7.1	22	10.4903	Electricity Generation	1.09692e+10	Odessa-Ector Generating Station	TX	0.0431553	2.27079	10.6391	7.28023	5.08787	20.6502	32.9834	1142.72	79.7998	167.238	-393.476	25.2448	57.0942	75.5359	35.0195	46.1086	194.478	226.88	11.4041	1.82058	0.58226	0.929538	6.21475e+08	18.35	0.228041	0.260796	11.676	1.864	0.606143	0.0967665	1.48476	0.237031	3.33824e+08
2222	-97.3	28.31	502.68	2320	26.4693	27.7927	0.0483858	2000	0	7	0	30.4568	Petroleum and Natural Gas Systems	9.48964e+09	COPANO PROCESSING HOUSTON CENTRAL GAS PLT	TX	0.0490291	1.44908	10.5456	7.29801	5.11338	20.668	33.0089	1142.68	85.3005	211.394	-349.372	69.4005	61.7362	90.0717	39.5982	52.4992	238.634	271.035	9.87366	1.9642	0.5353	1.06489	5.53357e+08	17.8432	0.293891	0.336104	10.1144	2.01208	0.554	0.110209	1.05321	0.20952	2.97228e+08
2880	-99.3	27.44	464.04	4708.54	27.528	28.9044	0.0462206	246	1.3	8.5	27.8	17.8152	Stationary Combustion	1.17065e+10	J K SPRUCE	TX	0.107004	10.3795	10.5134	7.37078	5.18937	20.7408	33.0849	1178.62	82.4536	163.209	-397.56	21.2156	59.5647	78.1355	35.7856	47.2597	190.449	222.851	12.0552	2.59788	1.6403	3.53482	5.28595e+08	22.8062	0.244647	0.279788	12.2845	2.6473	1.71189	0.368909	5.12634	1.10472	2.83818e+08
637	-96.9	31.19	745.951	2013	23.9177	25.1136	0.06452	2000	0	8.67	31.4	25.9768	Stationary Combustion	1.33226e+10	TENASKA GATEWAY GENERATING STATION	TX	0.0415777	2.9517	10.766	7.38088	5.17805	20.7509	33.0736	1346.64	96.5321	199.208	-361.505	57.2141	71.1522	91.7662	39.7818	53.2334	226.447	258.849	13.8391	1.85523	0.714474	0.957804	7.37874e+08	18.7554	0.317797	0.363444	14.1621	1.89854	0.746649	0.100094	2.10263	0.281873	3.96349e+08
210	-113.3	32.94	600.591	4288.33	25.4811	26.7552	0.0551594	640	0	8	25.5	42.5868	Electricity Generation	1.62316e+10	Hugo	OK	0.0968042	100	10.6701	7.38377	5.19049	20.7538	33.086	1253.1	88.7747	184.372	-376.363	42.3781	64.68	83.4888	37.6313	49.6036	211.611	244.013	16.6475	2.77185	5.63967	9.39021	6.30823e+08	26.3901	0.281157	0.321541	16.9223	2.8176	6.20725	1.03352	45.4648	7.57002	3.38703e+08
1660	-99	29.06	526.212	2132	25.4272	26.6986	0.0485686	164	4.2	6.6	27.1	14.0518	Electricity Generation	1.04199e+10	W A PARISH	TX	0.044466	39.1895	10.62	7.40433	5.21944	20.7743	33.115	1155.49	80.6812	169.042	-391.705	27.0481	57.972	76.1308	35.3277	46.3756	196.281	228.683	10.806	2.05355	1.87048	3.55462	5.55449e+08	19.4546	0.233488	0.267025	11.0482	2.09957	2.06856	0.393103	15.6206	2.96849	2.98353e+08
1942	-98.6	28.56	491.64	2374	26.5619	27.8899	0.0474409	400	0	8.2	27.3	29.6064	Electricity Generation	9.96852e+09	BAYSIDE POWER STATION	FL	0.0503398	10.9862	10.5834	7.41007	5.22681	20.7801	33.1223	1179.19	82.5384	183.326	-377.434	41.3324	59.5924	78.2548	35.924	47.3103	210.565	242.967	10.3442	2.10402	0.901342	1.83334	5.42552e+08	19.0659	0.243	0.277904	10.5804	2.15206	0.964509	0.196182	4.67533	0.950966	2.91418e+08
1648	-97.3	29.06	495.71	2295	25.4503	26.7229	0.0458246	30	0	6.9	0	6.24821	Petroleum and Natural Gas Systems	8.9452e+09	SABINE PASS LNG LP - SABINE PASS LNG IMPORT TERMINAL	LA	0.0484223	1.32792	10.536	7.41105	5.23023	20.7811	33.1258	947.975	69.4313	145.221	-415.532	3.22719	48.3233	64.7411	31.5902	41.3764	172.46	204.862	9.30961	1.87803	0.495231	0.999033	5.24067e+08	17.7642	0.209124	0.239162	9.53793	1.92409	0.512275	0.103342	0.945535	0.190744	2.81496e+08
1042	-97.4	30.19	569.811	3740	24.6984	25.9333	0.0508645	26	0	0	0	12.1168	Electricity Generation	1.07947e+10	SANFORD	FL	0.0834951	3.99788	10.6585	7.4202	5.2322	20.7902	33.1277	1144.83	79.8774	167.469	-393.261	25.4758	57.2385	75.4954	33.3114	46.0938	194.709	227.111	11.1911	1.96401	1.08291	1.90047	5.81704e+08	19.2385	0.228768	0.261628	11.4448	2.00854	1.12407	0.197271	2.57164	0.451314	3.12396e+08
2576	-99	27.69	513.28	2724	27.1355	28.4923	0.0505937	1366	0	8.33	38.3	29.9822	Stationary Combustion	1.22492e+10	J K SPRUCE	TX	0.058835	10.3795	10.6392	7.42065	5.23299	20.7906	33.1285	1309.73	93.2648	181.138	-379.631	39.1442	68.601	88.018	39.0825	51.598	208.377	240.779	12.6452	2.46361	1.12747	2.1966	5.78608e+08	21.8545	0.302227	0.345638	12.8967	2.5126	1.1939	0.232603	4.93251	0.960977	3.10762e+08
969	-96.4	30.31	646.701	4668	24.9285	26.1749	0.0582238	160	0	0	0	35.8515	Pulp and Paper Manufacturing	1.09998e+10	GEORGIA-PACIFIC PORT HUDSON OPERATIONS	LA	0.106019	1.59298	10.7795	7.42852	5.23185	20.7985	33.1274	1169.07	81.4484	170.664	-390.067	28.67	58.5864	76.7567	35.3527	46.6475	197.903	230.305	11.4509	1.77067	1.28175	1.98198	6.65869e+08	17.1969	0.233195	0.26669	11.7411	1.81554	1.32163	0.204365	1.98182	0.306452	3.57569e+08
3011	-98.8	26.44	417.29	4930	28.6166	30.0474	0.0433088	200	0	0	0	32.0536	Electricity Generation	9.63567e+09	MANATEE	FL	0.112379	100	10.4872	7.43364	5.25693	20.8036	33.1525	1164.26	81.1657	184.387	-376.397	42.3938	58.5593	76.6367	35.4687	46.6044	211.627	244.029	9.9641	2.38781	4.28247	10.2626	4.95295e+08	20.1175	0.235858	0.269736	10.1786	2.43921	4.73146	1.13385	35.556	8.5207	2.65946e+08
1724	-99.5	28.94	509.72	3496.14	25.8608	27.1538	0.0477316	138	5.2	6.9	24.5	31.1771	Electricity Generation	1.10057e+10	W A PARISH	TX	0.0775761	9.53079	10.6301	7.46556	5.28188	20.8356	33.1774	1159.19	80.9442	169.575	-391.175	27.5812	58.2104	76.667	35.4118	46.6115	196.814	229.216	11.3766	2.23193	1.21477	2.3832	5.45876e+08	20.841	0.235554	0.269388	11.6142	2.27855	1.2779	0.250705	4.51631	0.886036	2.93156e+08
2202	-82.4	27.44	495.665	4010	29.2806	30.7446	0.0530739	1490	0	7.2	28.5	13.2302	Stationary Combustion	7.80597e+09	TROPICANA MANUFACTURING CO INC	FL	0.0900485	0.43467	10.6879	7.46652	5.2757	20.8365	33.1712	1507.78	100.848	211.43	-349.379	69.4369	75.6648	83.3162	37.9757	49.5411	238.67	271.072	8.22138	1.65865	0.75717	1.52758	6.06972e+08	13.5449	0.284731	0.325629	8.48378	1.7116	0.783067	0.157983	0.947302	0.191117	3.25988e+08
1243	-98	29.69	571.651	2300	24.8375	26.0793	0.0514939	620	0	7	25.5	8.01238	Electricity Generation	1.06947e+10	SABINE	TX	0.0485437	1.09669	10.7067	7.469	5.28016	20.839	33.1757	1202.94	84.6185	176.539	-384.201	34.5453	61.2531	79.9159	36.7313	48.036	203.778	236.18	11.104	1.94245	0.58027	1.01508	5.88903e+08	18.8554	0.254117	0.290617	11.3609	1.98739	0.598299	0.104662	1.00038	0.174998	3.16318e+08
1872	-98.6	28.69	495.399	2374	26.3091	27.6246	0.0473332	400	0	8.2	27.3	25.2234	Electricity Generation	9.98011e+09	BAYSIDE POWER STATION	FL	0.0503398	11.0304	10.6222	7.48224	5.29914	20.8522	33.1947	1179.6	82.5956	182.508	-378.248	40.5144	59.6251	78.3043	35.9398	47.3315	209.747	242.149	10.3551	2.09025	0.902549	1.82186	5.4132e+08	19.1293	0.243372	0.278329	10.5908	2.13783	0.965782	0.19495	4.68305	0.94531	2.90756e+08
2251	-82.3	27.44	524.802	2500	29.0373	30.4892	0.0557986	1660	0.5	7.1	30.2	22.6845	Stationary Combustion	8.33794e+09	TROPICANA MANUFACTURING CO INC	FL	0.0533981	0.43467	10.7379	7.48997	5.29593	20.86	33.1915	1518.62	101.748	180.027	-380.78	38.0333	76.4037	85.5089	38.2759	50.5034	207.266	239.668	8.78086	1.67317	0.486593	0.927192	6.38133e+08	13.7602	0.289995	0.331649	9.05713	1.72582	0.503732	0.0959852	0.676424	0.128891	3.42773e+08
1138	-96.1	29.94	1341.05	38157	25.0642	26.3174	0.116611	2000	0	7.6	0	29.8737	Stationary Combustion	2.21088e+10	ORMET PRIMARY ALUMINUM CORP.	LA	0.918859	0.737067	10.9339	7.49226	5.26079	20.8623	33.1563	1557.06	113.094	232.055	-328.683	90.0609	85.6708	107.014	45.3903	59.9317	259.294	291.696	24.629	1.83655	22.6934	16.9222	1.33361e+09	18.468	0.40091	0.458495	25.339	1.8895	23.3539	1.74147	23.9636	1.78693	7.13608e+08
1153	-90.9	29.81	443.59	2862.38	25.8926	27.1872	0.0417897	185	0	7.4	0	17.613	Stationary Combustion	5.44218e+09	EUNICE NATURAL GAS PROCESSING PLANT	LA	0.0621936	0.293687	10.5202	7.49258	5.3185	20.8626	33.214	949.024	69.468	145.362	-415.39	3.36858	48.3843	64.8064	31.6058	41.4051	172.602	205.003	5.77612	1.30213	0.3682	0.830046	4.77923e+08	12.0859	0.205395	0.234897	5.98427	1.34905	0.382354	0.0861953	0.469739	0.105895	2.56712e+08
206	-113.3	33.06	626.721	4288.33	25.5505	26.828	0.0576805	1346	0	0	0	43.9546	Electricity Generation	1.6828e+10	Hugo	OK	0.0968042	100	10.8028	7.50714	5.31105	20.8771	33.2066	1359.6	97.599	201.097	-359.633	59.1038	72.029	91.682	40.2413	53.1998	228.337	260.739	17.2634	2.75457	5.88341	9.38761	6.59655e+08	26.1704	0.328129	0.375261	17.5509	2.80044	6.47696	1.03347	47.529	7.58376	3.54185e+08
277	-113	32.81	592.081	2772.83	25.6787	26.9626	0.054992	1230	0	0	31.5	21.6832	Electricity Generation	1.58766e+10	Hugo	OK	0.06002	100	10.7754	7.50837	5.31527	20.8784	33.2108	1330.34	95.1986	196.519	-364.216	54.5258	70.0315	90.0771	39.7432	52.4961	223.759	256.161	16.3046	2.75378	4.9945	8.43551	6.28909e+08	25.9252	0.315548	0.360873	16.5789	2.80011	5.55141	0.937611	44.6994	7.54955	3.37758e+08
1208	-96.8	29.81	552.81	4500	24.898	26.1429	0.0497808	96	0	7.4	0	8.38135	Stationary Combustion	9.79276e+09	WATERFORD 1 & 2	LA	0.101942	2.20409	10.6788	7.51492	5.32836	20.8849	33.2239	1140.69	79.4836	166.768	-393.973	24.7742	56.9568	74.9211	34.9301	45.8435	194.007	226.409	10.1779	1.84111	1.11767	2.0218	5.69311e+08	17.8775	0.225629	0.258038	10.4257	1.88595	1.15372	0.2087	1.93473	0.34998	3.05719e+08
82	-115.3	33.81	650.384	2330	23.8333	25.025	0.0560041	240	0	0	0	47.1881	Electricity Generation	1.97788e+10	Springerville Generating Station	AZ	0.0492718	100	10.7865	7.52744	5.33318	20.8974	33.2287	1202.36	84.6848	176.489	-384.231	34.4954	61.1737	80.2242	36.7379	48.1679	203.728	236.13	20.2147	3.10812	5.08583	7.81973	6.40483e+08	31.5616	0.263583	0.301443	20.4946	3.15116	5.65004	0.868724	45.5188	6.99876	3.43976e+08
1516	-98.6	29.31	535.67	3709.69	25.2071	26.4675	0.0488947	180	3	7.2	22.3	10.6714	Stationary Combustion	1.02221e+10	CHANNEL ENERGY CENTER	TX	0.0827594	3.05015	10.6628	7.53757	5.35224	20.9076	33.2478	1159.71	81.034	169.729	-391.015	27.7349	58.2666	76.6428	35.5462	46.5998	196.968	229.37	10.603	1.97938	0.986404	1.84144	5.59177e+08	18.9617	0.234803	0.268529	10.8465	2.02485	1.02121	0.190642	2.08286	0.388833	3.003e+08
831	-97	30.69	588.961	5459.41	24.5397	25.7667	0.0520489	30	3.6	6.7	24.5	13.8672	Stationary Combustion	1.0671e+10	PUTNAM	FL	0.125228	2.27079	10.7252	7.54088	5.35136	20.9109	33.2469	1148.21	80.1809	168.047	-392.676	26.053	57.47	75.6296	35.0575	46.1512	195.286	227.688	11.0681	1.87926	1.47235	2.49992	5.9525e+08	18.594	0.229619	0.262601	11.3276	1.92332	1.51644	0.257478	2.35763	0.400304	3.19606e+08
1505	-99	29.31	545.33	3334	24.8901	26.1346	0.0491586	142	0	8	0	28.5729	Electricity Generation	1.07735e+10	W A PARISH	TX	0.0736408	4.10697	10.6827	7.55491	5.36921	20.9249	33.2647	1158.19	80.9025	169.467	-391.275	27.4733	58.1441	76.663	35.3462	46.6084	196.706	229.108	11.1576	2.04603	0.969093	1.77708	5.62196e+08	19.8465	0.234786	0.26851	11.4026	2.09095	1.00698	0.184654	2.44423	0.44821	3.01931e+08
1147	-90.4	29.81	442.43	3620.13	26.0249	27.3261	0.0418873	196	0	0	21	4.81456	Petroleum and Natural Gas Systems	5.46808e+09	Terrell Gas Plant	TX	0.0805857	0.321075	10.5677	7.57035	5.3961	20.9403	33.2916	949.881	69.5373	145.507	-415.248	3.51353	48.4563	64.8765	31.6145	41.4364	172.747	205.148	5.80058	1.31107	0.477265	1.07874	4.79038e+08	12.1088	0.205765	0.235321	6.00902	1.35819	0.495386	0.111969	0.591136	0.133611	2.57294e+08
595	-92.5	31.31	581.461	2390	24.0269	25.2283	0.0506085	240	0	0	0	9.65034	Electricity Generation	8.26907e+09	Newman	TX	0.0507282	0.354103	10.7398	7.57162	5.38393	20.9416	33.2795	1153.47	80.6391	168.9	-391.819	26.9062	57.8375	76.2743	35.2652	46.4336	196.139	228.541	8.67455	1.49186	0.453131	0.779297	5.78777e+08	14.9877	0.230278	0.263354	8.92766	1.53539	0.467735	0.0804413	0.595331	0.102385	3.10889e+08
2821	-99.3	27.56	446.19	2120	27.4701	28.8437	0.0445558	416	0	8.6	30	11.69	Stationary Combustion	1.1034e+10	J K SPRUCE	TX	0.0441748	10.3795	10.6244	7.57254	5.39373	20.9425	33.2893	1190.96	83.5101	210.124	-350.644	68.1304	60.4222	79.1783	36.151	47.7172	237.363	269.765	11.3858	2.55179	0.840694	1.88416	5.09557e+08	22.3446	0.250518	0.286502	11.6075	2.60146	0.895984	0.200808	4.18866	0.938761	2.73696e+08
1171	-97.9	29.94	591.451	10600	24.5291	25.7556	0.0518679	554	0	6.4	0	13.1841	Stationary Combustion	1.16382e+10	TEXAS LEHIGH CEMENT COMPANY LP	TX	0.25	1.03899	10.7597	7.57965	5.39041	20.9497	33.2859	1146.97	82.8715	172.28	-388.456	30.286	59.7928	82.8909	37.3293	49.3413	199.519	231.921	12.1626	2.0564	3.08	5.20753	5.9318e+08	20.504	0.263947	0.30186	12.4556	2.10594	3.1585	0.534026	3.54177	0.598828	3.18267e+08
768	-96.9	30.81	579.641	2331.95	24.4167	25.6376	0.0512031	20	1.7	6.2	21	26.2403	Stationary Combustion	1.03419e+10	PUTNAM	FL	0.0493192	2.27079	10.7688	7.58123	5.39277	20.9512	33.2883	1141.09	79.6117	166.915	-393.805	24.9217	56.9658	75.2688	34.978	45.9925	194.155	226.557	10.75	1.8546	0.615091	1.06116	5.85577e+08	18.358	0.226963	0.259563	11.006	1.89877	0.639159	0.110268	1.467	0.253088	3.14532e+08
155	-112.8	33.56	572.721	3240	25.0676	26.321	0.0517721	240	0	0	0	18.4553	Electricity Generation	1.48128e+10	Comanche (8059)	OK	0.0713592	100	10.7867	7.59293	5.40375	20.9629	33.2993	1185.63	83.3097	173.924	-386.796	31.9303	60.048	78.5394	36.1201	47.4281	201.163	233.565	15.2132	2.6563	4.86636	8.49692	5.92084e+08	25.6943	0.251689	0.28784	15.4718	2.70146	5.39332	0.941702	42.2466	7.37648	3.1796e+08
153	-112.4	33.56	585.051	3070	25.0132	26.2639	0.052793	330	0	7.2	0	11.9796	Electricity Generation	1.68248e+10	Blythe Energy	CA	0.067233	100	10.774	7.59889	5.40842	20.9689	33.304	1208.04	85.1575	177.418	-383.307	35.4248	61.6008	80.1466	36.4893	48.1346	204.658	237.06	17.2313	2.94526	5.01383	8.56991	6.0376e+08	28.5399	0.263606	0.30147	17.4948	2.99031	5.55002	0.94864	43.1295	7.37193	3.24225e+08
147	-112.9	33.56	568.641	3230	25.1353	26.3921	0.051546	240	0	0	0	13.9236	Electricity Generation	1.49879e+10	LAKE CATHERINE	AR	0.0711165	100	10.7814	7.60214	5.41325	20.9721	33.3088	1186.55	83.3828	174.065	-386.657	32.0711	60.1161	78.739	36.152	47.5161	201.304	233.706	15.3861	2.70577	4.85846	8.54399	5.89499e+08	26.1003	0.252345	0.288591	15.6435	2.75104	5.38303	0.946649	42.0752	7.39926	3.1657e+08
50	-119.8	35.56	533.087	2350	24.4391	25.661	0.0469397	460	0	8.3	0	2.15887	Stationary Combustion	1.2244e+10	Aera Energy Coalinga	CA	0.0497573	100	10.6927	7.61836	5.43585	20.9884	33.3314	1015.34	75.2577	156.084	-404.609	14.0907	52.9765	69.9944	33.9064	43.6722	183.324	215.726	12.6158	2.36656	4.0556	7.60775	5.3682e+08	23.501	0.244576	0.279706	12.8512	2.41071	4.52897	0.849574	37.9477	7.11848	2.88327e+08
141	-112.9	33.56	566.601	3230	25.1353	26.3921	0.0513611	240	0	0	0	13.9236	Electricity Generation	1.49342e+10	LAKE CATHERINE	AR	0.0711165	100	10.791	7.62793	5.43928	20.9979	33.3348	1186.55	83.3828	174.065	-386.657	32.0712	60.1162	78.9679	36.0862	47.6166	201.304	233.706	15.3309	2.70577	4.84103	8.54399	5.87384e+08	26.1003	0.252345	0.288591	15.5874	2.75104	5.36372	0.946649	41.9243	7.39926	3.15434e+08
608	-96.9	31.31	802.241	10151	23.8246	25.0158	0.0682031	2000	0	7.2	0	14.3336	Stationary Combustion	1.47706e+10	TENASKA GATEWAY GENERATING STATION	TX	0.239102	2.9517	10.9036	7.6375	5.43158	21.0075	33.3271	1408.31	101.45	208.915	-351.795	66.9217	75.42	87.7098	41.6609	51.4523	236.155	268.557	15.4172	1.92177	3.8333	4.77825	7.79996e+08	19.7658	0.343307	0.392618	15.804	1.96999	3.94543	0.491802	5.37733	0.670289	4.18538e+08
167	-112.6	33.44	646.601	3240	23.9041	25.0993	0.0557511	402	0	7.7	31.5	20.1352	Electricity Generation	1.58795e+10	Comanche (8059)	OK	0.0713592	100	10.8411	7.641	5.44703	21.011	33.3426	1210.84	85.4189	177.905	-382.81	35.9112	61.7862	70.2346	36.6302	43.7814	205.144	237.546	16.3109	2.52256	5.23527	8.0966	6.37589e+08	25.5821	0.263059	0.300843	16.5895	2.56565	5.80274	0.897423	45.4885	7.03502	3.42397e+08
161	-112.6	33.44	648.621	3240	23.9041	25.0993	0.0559252	402	0	7.7	31.5	22.681	Electricity Generation	1.59291e+10	Comanche (8059)	OK	0.0713592	100	10.8466	7.64291	5.44874	21.0129	33.3443	1210.95	85.4243	177.916	-382.798	35.9228	61.7909	80.2656	36.923	48.185	205.156	237.558	16.3618	2.52256	5.25162	8.0966	6.39581e+08	25.5821	0.263087	0.300876	16.6414	2.56565	5.82087	0.897423	45.6306	7.03502	3.43467e+08
1591	-81.3	28.19	404.83	2080	28.5442	29.9715	0.0422436	1230	0.9	7.9	22.6	12.1391	Stationary Combustion	6.40688e+09	R S NELSON	LA	0.0432039	0.605994	10.5693	7.64834	5.47345	21.0183	33.369	1217.73	85.4629	178.529	-382.264	36.5358	62.2694	81.3375	36.9896	48.6697	205.769	238.171	6.74399	1.66588	0.310061	0.765904	4.83113e+08	13.9594	0.25523	0.29189	6.95354	1.71764	0.321635	0.0794493	0.503912	0.124475	2.59513e+08
471	-112.5	32.06	632.171	4880	23.8104	25.0009	0.0542846	240	0	0	0	69.3393	Electricity Generation	1.73387e+10	Hugo	OK	0.111165	100	10.8454	7.66145	5.4692	21.0314	33.3647	1205.42	84.7286	176.789	-383.954	34.7956	61.3622	79.8621	36.3582	48.013	204.029	236.43	17.8917	2.8302	5.95317	9.41704	6.20818e+08	28.8195	0.2614	0.298946	18.1553	2.87189	6.51421	1.03045	45.1435	7.14103	3.33283e+08
1054	-94.4	30.19	966.519	34648.7	24.96	26.208	0.0843474	2000	0	8.19	0	17.7614	Hydrogen Production	1.35479e+10	AIR PRODUCTS & CHEMICALS INC - GEISMAR SMR	LA	0.833705	0.406058	10.8546	7.67113	5.45415	21.0411	33.3497	1314.03	97.9782	201.295	-359.439	59.3018	72.8228	99.4349	42.6863	56.6041	228.535	260.937	15.1319	1.56561	12.6406	13.0785	9.64627e+08	15.6868	0.352034	0.402599	15.6534	1.61956	13.0786	1.35316	13.3216	1.37831	5.16397e+08
1268	-97.8	29.69	477.45	2060	24.8733	26.117	0.043086	180	0	7.4	0	6.32304	Stationary Combustion	8.8519e+09	LAGRANGE PLANT	TX	0.0427184	1.09669	10.6382	7.68683	5.51047	21.0568	33.406	965.48	70.9243	148.025	-412.715	6.03173	49.5314	66.1089	31.9968	41.9748	175.265	207.667	9.19552	1.92596	0.427325	0.895014	4.92747e+08	18.6617	0.217825	0.249112	9.41052	1.97099	0.44116	0.0923992	0.777598	0.162865	2.64678e+08
1726	-99	28.94	493.35	4102	25.9031	27.1983	0.0462649	255	0	6.47	25.5	3.69047	Electricity Generation	9.8216e+09	W A PARISH	TX	0.0922816	39.1895	10.7066	7.69186	5.51038	21.0619	33.4059	1168.36	81.7133	171.056	-389.696	29.062	58.8711	77.3357	35.6195	46.9053	198.295	230.697	10.1794	2.06333	2.26343	4.58787	5.29103e+08	19.239	0.238464	0.272716	10.4096	2.10998	2.46273	0.499185	15.3689	3.1152	2.84134e+08
2752	-99.5	28.81	479.801	2275	25.9027	27.1979	0.0451	60	0	6.8	24	40.6119	Electricity Generation	1.03558e+10	W A PARISH	TX	0.0479369	9.53079	10.7199	7.70125	5.52157	21.0713	33.4171	1147.26	79.957	203.08	-357.671	61.0859	57.3775	70.3447	35.164	43.836	230.319	262.721	10.7128	2.23275	0.827435	1.72454	5.1578e+08	20.77	0.23047	0.263574	10.9375	2.27959	0.880498	0.183513	3.94085	0.821351	2.77037e+08
1831	-98.6	28.81	547.51	2828	26.0521	27.3547	0.0517617	1900	0	7.2	0	22.2697	Electricity Generation	1.09678e+10	BAYSIDE POWER STATION	FL	0.0613592	11.0304	10.8401	7.70717	5.51799	21.0772	33.4135	1343.21	96.0424	167.865	-392.89	25.8714	70.9192	90.8282	39.9823	52.8293	195.104	227.506	11.3753	2.07764	1.11493	2.03636	5.91966e+08	19.2161	0.315255	0.360537	11.633	2.1247	1.18689	0.216779	5.25173	0.959201	3.17942e+08
1440	-100.4	29.31	650.841	2592	24.1844	25.3937	0.0570544	1390	0	6.7	34	115.462	Electricity Generation	1.52241e+10	W A PARISH	TX	0.0556311	10.188	10.9125	7.71577	5.52034	21.0858	33.4159	1340.64	95.8838	197.926	-362.815	55.9328	70.6486	90.1553	40.0425	52.5314	225.166	257.568	15.6709	2.4078	1.29628	1.9917	6.52495e+08	24.017	0.318065	0.36375	15.9555	2.45151	1.36925	0.210382	5.50745	0.846206	3.50442e+08
279	-112.9	32.81	555.9	2772.83	26.0675	27.3708	0.0524137	1230	0	0	31.5	19.8994	Electricity Generation	1.50552e+10	Hugo	OK	0.06002	100	10.8293	7.72251	5.53252	21.0925	33.4281	1328.65	95.0496	196.247	-364.491	54.2535	69.9172	89.5776	40.1172	52.2772	223.486	255.888	15.4631	2.78164	4.75572	8.55498	5.99422e+08	25.7967	0.314607	0.359796	15.7246	2.82866	5.28651	0.950982	42.5991	7.66308	3.21923e+08
241	-112.9	32.94	566.881	2152.84	25.5449	26.8222	0.0524215	1058	0	0	33.5	17.0152	Electricity Generation	1.52716e+10	Hugo	OK	0.0449719	100	10.8414	7.73839	5.54838	21.1084	33.4439	1303.7	93.0261	192.367	-368.365	50.3738	68.198	79.1115	38.9896	47.6816	219.607	252.009	15.6845	2.76681	4.53355	7.99736	5.99511e+08	26.1621	0.304237	0.347937	15.9462	2.81298	5.06089	0.892762	42.3824	7.47642	3.21999e+08
2247	-98.4	28.19	417.47	3350	26.6246	27.9558	0.040335	301	0	7.4	0	9.81753	Petroleum and Natural Gas Systems	8.77859e+09	TARGA MIDSTREAM SERVICES LLC - VENICE GAS PROCESSING PLANT	LA	0.0740291	10.9862	10.6147	7.75987	5.58851	21.1299	33.484	981.553	72.1296	175.644	-385.12	33.6504	50.6371	68.7472	32.3708	43.1373	202.883	235.285	9.09306	2.17813	0.996757	2.38761	4.61286e+08	19.7124	0.224751	0.257033	9.29356	2.22616	1.05515	0.252749	4.20975	1.0084	2.47737e+08
888	-95.8	30.44	537.06	2903.71	24.5732	25.8019	0.0477958	52	4.6	6.8	21.7	13.1552	Electricity Generation	8.93759e+09	S O PURDOM	FL	0.0631968	0.726167	10.8097	7.76398	5.5802	21.134	33.4757	1142.12	79.6518	167.039	-393.692	25.0455	57.0502	75.2629	35.1887	45.9918	194.278	226.68	9.3163	1.73468	0.614107	1.14346	5.4661e+08	17.0438	0.226221	0.258715	9.5549	1.77911	0.632599	0.117789	0.879702	0.163799	2.93587e+08
1553	-96.3	29.19	450.13	2819	25.7926	27.0822	0.0421773	93	0	7.5	0	6.54442	Petroleum and Natural Gas Systems	7.17838e+09	CHISOLM PLANT	TX	0.0611408	1.05047	10.6508	7.76973	5.59496	21.1397	33.4905	950.108	69.5826	145.542	-415.213	3.5484	48.4703	64.8936	31.5893	41.4438	172.781	205.183	7.51305	1.66908	0.491709	1.09237	4.82355e+08	15.5758	0.208333	0.238258	7.72306	1.71574	0.508908	0.113058	0.824354	0.183137	2.59083e+08
1533	-100	29.19	524.98	3292	25.0659	26.3192	0.0476567	240	0	0	0	79.9288	Electricity Generation	1.15447e+10	W A PARISH	TX	0.0726214	4.52504	10.8047	7.77664	5.59308	21.1466	33.4886	1176.87	82.3667	172.281	-388.465	30.2873	59.3816	75.9587	35.752	46.2998	199.52	231.922	11.9153	2.26966	1.02278	1.94823	5.45019e+08	21.8621	0.24403	0.279082	12.1527	2.31488	1.06121	0.202144	2.59636	0.494562	2.92699e+08
2851	-99.1	27.56	462.24	9447.96	27.3222	28.6884	0.0453047	213	1.2	7.7	30.9	24.0274	Stationary Combustion	1.13568e+10	J K SPRUCE	TX	0.222038	10.3795	10.7504	7.77727	5.59734	21.1473	33.4929	1207.08	84.6435	189.124	-371.645	47.1308	61.5223	80.046	36.37	48.0985	216.364	248.766	11.8428	2.56205	2.97296	6.43163	5.18121e+08	22.8573	0.255403	0.292088	12.0956	2.61674	3.07495	0.665227	6.4195	1.38878	2.78007e+08
1574	-98.8	29.19	506.53	4694.77	25.4152	26.686	0.0465515	151	3	6.8	24.7	18.0396	Stationary Combustion	9.858e+09	CHANNEL ENERGY CENTER	TX	0.106669	11.0304	10.7668	7.77775	5.59584	21.1478	33.4914	1159.48	80.9838	169.661	-391.086	27.6674	58.2435	76.6384	35.3303	46.5984	196.9	229.302	10.2152	2.01669	1.46462	2.89148	5.3238e+08	19.1877	0.23448	0.26816	10.4467	2.06241	1.53972	0.303974	5.19456	1.02552	2.85873e+08
2058	-98.1	28.44	425.56	2003	26.0148	27.3156	0.0402472	125	0	7.6	26.5	3.50705	Stationary Combustion	9.38902e+09	EQUISTAR CHEMICALS LAPORTE COMPLEX	TX	0.041335	12.3906	10.6307	7.78805	5.61684	21.1581	33.5124	993.519	72.2046	168.66	-392.102	26.6663	50.7169	65.9203	32.4625	41.8959	195.899	228.301	9.70825	2.28129	0.765466	1.79873	4.60282e+08	21.092	0.220322	0.251969	9.90859	2.32836	0.822822	0.19335	4.37346	1.0277	2.47235e+08
757	-95.9	30.81	560.35	4213	24.5133	25.739	0.0496042	92	0	0	0	27.0321	Electricity Generation	8.98925e+09	S O PURDOM	FL	0.0949757	1.05062	10.8426	7.80259	5.61628	21.1726	33.5118	1148.07	80.1597	168.004	-392.717	26.0108	57.4472	75.7697	35.0923	46.2126	195.244	227.646	9.37714	1.67344	0.928659	1.65728	5.67292e+08	16.5297	0.228363	0.261164	9.62477	1.71763	0.957297	0.170839	1.32828	0.237045	3.04654e+08
1731	-99	28.94	544.43	4102	25.9031	27.1983	0.0510551	2000	0	8.35	0	7.35951	Electricity Generation	1.08385e+10	W A PARISH	TX	0.0922816	39.1895	10.8959	7.83597	5.64772	21.206	33.5433	1360.24	97.4691	201.145	-359.606	59.1519	72.11	91.8553	38.025	53.2795	228.385	260.787	11.2334	2.06333	2.49777	4.58787	5.83884e+08	19.239	0.322689	0.369039	11.4874	2.10998	2.71771	0.499185	16.9601	3.1152	3.13552e+08
1344	-98.1	29.44	681.903	8249	25.1457	26.403	0.0616325	1562	0	6.6	28.2	12.1293	Stationary Combustion	1.29424e+10	LONGHORN GLASS MANUFACTURING LP	TX	0.192937	1.09669	10.9594	7.84409	5.644	21.2141	33.5395	1333.45	95.2179	196.975	-363.769	54.9817	70.2558	89.4845	39.6192	52.2375	224.215	256.617	13.5161	1.98211	2.65711	3.89661	7.04852e+08	19.1758	0.309911	0.354425	13.8094	2.02512	2.7203	0.398929	3.20118	0.469448	3.78309e+08
822	-97.1	30.69	548.688	2841.71	24.4721	25.6957	0.0485465	33	7.5	7	24.1	18.0837	Stationary Combustion	1.00845e+10	PUTNAM	FL	0.061692	2.27079	10.8824	7.85099	5.66614	21.221	33.5617	1143.83	79.8351	167.35	-393.373	25.356	57.1632	75.59	35.028	46.1339	194.589	226.991	10.4684	1.90789	0.726319	1.32374	5.55196e+08	18.8553	0.22841	0.261218	10.7109	1.9521	0.752125	0.137077	1.53696	0.280116	2.98194e+08
126	-112.8	33.56	555.04	3240	25.0676	26.321	0.0501739	240	0	0	0	25.026	Electricity Generation	1.43556e+10	Comanche (8059)	OK	0.0713592	100	10.8899	7.85171	5.66462	21.2217	33.5602	1185.91	83.324	173.955	-386.765	31.961	60.0603	78.7188	36.1281	47.5069	201.194	233.596	14.7435	2.6563	4.71614	8.49692	5.73806e+08	25.6943	0.251765	0.287928	14.9942	2.70146	5.22683	0.941702	40.9424	7.37648	3.08144e+08
2081	-98.3	28.44	417.6	3089	26.3427	27.6598	0.0399212	220	0	8.4	26	7.14452	Stationary Combustion	9.02804e+09	EQUISTAR CHEMICALS LAPORTE COMPLEX	TX	0.0676942	12.3906	10.6496	7.85664	5.68606	21.2266	33.5816	1005.1	73.143	152.604	-408.158	10.6107	51.5128	71.5031	32.199	44.3467	179.844	212.246	9.33999	2.23659	0.993489	2.37904	4.56553e+08	20.4576	0.224756	0.257039	9.53852	2.28413	1.05555	0.252766	4.57697	1.09602	2.45201e+08
1355	-95.9	29.44	560.83	5937	25.8053	27.0956	0.0523586	2000	0	7.3	0	17.2422	Stationary Combustion	8.73086e+09	OSCEOLA	FL	0.13682	0.544521	10.9012	7.85789	5.66798	21.2279	33.5635	1312.75	93.4238	193.67	-367.082	51.6765	68.8223	88.2366	39.5796	51.6911	220.91	253.311	9.13248	1.62838	1.27033	2.26509	5.98792e+08	15.2515	0.298083	0.340899	9.39257	1.67476	1.30871	0.233353	1.51163	0.269535	3.21518e+08
910	-97.5	30.44	695.761	3175	24.4921	25.7167	0.0615845	892	0	8.2	0	8.8686	Pulp and Paper Manufacturing	1.36159e+10	MEADWESTVACO EVADALE	TX	0.0697816	3.0939	10.9844	7.86433	5.66424	21.2343	33.5598	1255.26	88.6213	184.268	-376.457	42.2747	64.5623	83.0738	37.5225	49.4198	211.508	243.91	14.0991	2.02643	1.123	1.61406	7.04303e+08	20.0185	0.273743	0.313063	14.4067	2.07063	1.16319	0.167183	2.51962	0.362139	3.78257e+08
2571	-99.4	27.69	437.19	3289.48	27.5658	28.9441	0.0437311	800	3.3	8.8	27.8	13.7069	Stationary Combustion	1.00333e+10	J K SPRUCE	TX	0.0725601	10.3795	10.7604	7.86535	5.68791	21.2353	33.5835	1233.36	86.9805	193.071	-367.697	51.0769	63.3465	83.3104	37.204	49.5311	220.31	252.712	10.3735	2.37277	1.08418	2.47988	5.00125e+08	20.7419	0.267707	0.30616	10.5909	2.42248	1.14456	0.261798	4.37586	1.0009	2.68594e+08
491	-112.5	32.06	612.771	4880	23.8104	25.0009	0.0526187	240	0	0	0	78.767	Electricity Generation	1.68066e+10	Hugo	OK	0.111165	100	10.9185	7.86634	5.67611	21.2363	33.5716	1205.81	84.749	176.833	-383.91	34.8394	61.3798	69.5485	36.6804	43.4853	204.072	236.474	17.3426	2.8302	5.77048	9.41704	6.01767e+08	28.8195	0.261509	0.299071	17.5981	2.87189	6.3143	1.03045	43.7582	7.14103	3.23055e+08
1938	-99.1	28.56	413.85	4529	26.4519	27.7745	0.0396135	145	0	7.4	28	23.0853	Electricity Generation	9.00173e+09	W A PARISH	TX	0.102646	13.6732	11.0087	7.88254	5.71259	21.2525	33.6081	1160.59	81.0157	183.775	-376.983	41.7815	58.315	76.9731	35.6354	46.7474	211.015	243.416	9.30452	2.24828	1.35061	3.26353	4.53034e+08	20.5382	0.235513	0.269341	9.50135	2.29584	1.42398	0.34408	5.27923	1.27564	2.43265e+08
488	-112.5	32.06	602.901	4880	23.8104	25.0009	0.0517712	240	0	0	0	70.3511	Electricity Generation	1.65359e+10	Hugo	OK	0.111165	100	10.9541	7.89288	5.70372	21.2629	33.5993	1205.46	84.7311	176.795	-383.949	34.801	61.3644	80.1291	36.4089	48.1303	204.034	236.436	17.0633	2.8302	5.67754	9.41704	5.92074e+08	28.8195	0.261413	0.298962	17.3146	2.87189	6.21259	1.03045	43.0533	7.14103	3.17852e+08
190	-113.3	33.06	565.07	4288.33	25.5505	26.828	0.0520065	640	0	8	25.5	34.0523	Electricity Generation	1.51726e+10	LAKE CATHERINE	AR	0.0968042	100	10.9219	7.89945	5.70998	21.2695	33.6055	1251.49	88.6703	184.159	-376.572	42.1652	64.5777	83.535	37.5802	49.6232	211.398	243.8	15.5653	2.75457	5.30466	9.38761	5.94765e+08	26.1704	0.2804	0.320676	15.8245	2.80044	5.83982	1.03347	42.8536	7.58376	3.19344e+08
2421	-98.9	27.94	493.92	9707	27.4215	28.7926	0.0486544	2000	0	7.22	44.1	5.33275	Petroleum and Natural Gas Systems	1.09526e+10	FASHING GAS TREATING PLANT	TX	0.228325	10.3795	10.8404	7.90507	5.72013	21.2751	33.6157	1219.96	91.5563	188.37	-372.4	46.3765	67.0955	86.677	41.4598	51.0096	215.61	248.011	11.4462	2.31741	2.98224	6.0379	5.5643e+08	20.5707	0.328599	0.375797	11.7198	2.37282	3.09401	0.626419	6.68612	1.35368	2.98585e+08
1527	-96.4	29.31	533.86	9972	25.5714	26.8499	0.0491018	2000	0	7.4	0	7.78119	Petroleum and Natural Gas Systems	8.58263e+09	CHISOLM PLANT	TX	0.234757	1.05047	10.8668	7.91497	5.7294	21.285	33.6249	1152.71	85.9914	177.335	-383.417	35.3412	65.6738	91.0629	39.7496	52.9317	204.574	236.976	9.01181	1.68805	2.15325	4.03337	5.61545e+08	16.0482	0.295895	0.338396	9.27716	1.73775	2.22059	0.415949	2.58752	0.48468	3.01367e+08
1694	-99.3	29.19	498.96	2478	25.2024	26.4625	0.0456186	172	0	7.7	24	26.9134	Electricity Generation	1.02744e+10	W A PARISH	TX	0.0528641	4.10697	10.8212	7.91602	5.73553	21.286	33.6311	1160.32	81.0635	169.775	-390.972	27.7812	58.2925	76.4218	35.3981	46.5034	197.014	229.416	10.6347	2.13138	0.699014	1.40094	5.2171e+08	20.3843	0.236145	0.270064	10.8621	2.17695	0.729463	0.146197	2.06335	0.41353	2.80216e+08
1835	-99.1	28.81	509.04	2020	25.9466	27.2439	0.0479787	1525	0	8.1	27	11.0681	Electricity Generation	1.04238e+10	W A PARISH	TX	0.0417476	39.1895	10.8974	7.92682	5.74277	21.2968	33.6383	1303.97	92.8598	167.759	-392.995	25.7652	68.2229	87.7495	39.1081	51.4775	194.998	227.4	10.8055	2.12272	1.8242	3.58361	5.48702e+08	19.6929	0.298738	0.341648	11.0446	2.16969	2.01923	0.396674	15.4068	3.02664	2.94733e+08
1725	-98.8	28.94	832.951	24602	25.8806	27.1746	0.0754686	2000	0	6.65	0	22.6573	Electricity Generation	1.64865e+10	W A PARISH	TX	0.589854	11.0304	11.1132	7.94325	5.73193	21.3133	33.6275	1543.59	112.154	229.869	-330.883	87.8751	84.748	120.244	49.4929	65.7425	257.108	289.51	17.9622	2.15646	11.203	13.4498	8.63087e+08	20.8116	0.398409	0.455635	18.4067	2.20982	11.5451	1.38604	17.4545	2.09551	4.62226e+08
902	-94.9	30.44	517.33	6162.06	24.876	26.1199	0.046448	85	1.1	7.4	24.5	8.89637	Electricity Generation	7.72047e+09	J R KELLY	FL	0.142283	0.401577	10.8653	7.9444	5.76265	21.3144	33.6582	1139.13	79.3801	166.571	-394.161	24.5776	56.848	74.8911	34.8485	45.8288	193.811	226.212	8.07673	1.56123	1.1628	2.2477	5.31196e+08	15.2048	0.223024	0.255058	8.30794	1.60593	1.19753	0.231482	1.33028	0.257144	2.85216e+08
2811	-99.3	27.69	441.56	2683.27	27.6518	29.0344	0.0443528	1247	3	8.5	23.9	15.7557	Stationary Combustion	1.02906e+10	J K SPRUCE	TX	0.0578464	10.3795	10.8248	7.94561	5.76714	21.3156	33.6627	1285.65	91.2853	197.921	-362.848	55.9271	66.9532	86.362	38.5652	50.871	225.16	257.562	10.6387	2.40934	0.951599	2.15508	5.07234e+08	20.974	0.290989	0.332786	10.8592	2.45928	1.00962	0.228649	4.2871	0.970898	2.72432e+08
1906	-99.3	28.69	412.27	3020.82	26.3065	27.6219	0.0393262	171	0	7.2	0	23.8972	Electricity Generation	8.87898e+09	W A PARISH	TX	0.0660393	39.1895	11.0424	7.95408	5.78467	21.3241	33.6802	1159.89	80.9882	165.47	-395.285	23.476	58.2663	76.3188	35.4003	46.4595	192.709	225.111	9.18691	2.22837	1.73217	4.20154	4.49749e+08	20.4268	0.23557	0.269406	9.38267	2.27585	1.89661	0.460039	12.8684	3.12135	2.41548e+08
1195	-103.3	29.56	559.35	2628.16	24.8754	26.1192	0.0503773	200	0.8	8	34.6	87.4912	Stationary Combustion	1.44599e+10	ONSHORE TREATING FACILITY	AL	0.0565088	100	10.9603	7.96337	5.776	21.3334	33.6715	990.263	72.8991	151.774	-408.963	9.78081	51.1601	67.6847	33.0266	42.666	179.014	211.416	14.8531	2.65541	4.51823	8.07764	5.76133e+08	25.7806	0.233515	0.267056	15.1044	2.70034	5.02761	0.89883	40.8912	7.31048	3.09421e+08
1551	-97.8	29.19	482.31	3648	25.6859	26.9702	0.0448943	600	0	7.1	0	1.44776	Petrochemical Production	9.13284e+09	OXY VINYLS LP - DEER PARK VCM FACILITY	TX	0.0812621	2.1097	10.8675	7.97445	5.79511	21.3444	33.6906	1170.37	82.8171	172.786	-387.965	30.792	59.7644	79.8413	36.4642	48.0053	200.025	232.427	9.48312	1.96619	0.839785	1.74117	5.13428e+08	18.4702	0.249917	0.285814	9.70657	2.01251	0.86725	0.179812	1.54149	0.319606	2.75735e+08
1915	-96.5	28.69	456.72	3082.82	26.9228	28.269	0.0446727	2000	0	8	0	3.71485	Petroleum Refining	7.57342e+09	VALERO REFINING HOUSTON REFINERY	TX	0.0675441	0.654027	10.8574	7.97792	5.79893	21.3479	33.6945	1272.21	91.0308	169.678	-391.085	27.6845	66.7905	87.8397	39.3982	51.5187	196.917	229.319	7.92666	1.73556	0.556735	1.21898	5.10893e+08	15.5153	0.291742	0.333647	8.14884	1.78421	0.574616	0.125814	0.782629	0.171358	2.74404e+08
231	-114.5	32.69	467.65	2330	27.5017	28.8768	0.0465302	136	0	0	21.5	9.42073	Electricity Generation	1.27522e+10	Ocotillo Power Plant	AZ	0.0492718	100	10.8894	7.98206	5.80016	21.3521	33.6957	1161.48	81.2332	170.041	-390.697	28.0476	58.3903	76.6808	35.6276	46.6155	197.281	229.682	13.1183	2.80516	4.04432	8.64818	5.32136e+08	24.6523	0.239845	0.274296	13.3505	2.8548	4.51335	0.965112	37.6401	8.04877	2.85809e+08
1026	-97.5	30.19	594.551	13519.2	24.6422	25.8743	0.0521196	56	5.6	6.6	26.3	6.91783	Electricity Generation	1.14119e+10	SANFORD	FL	0.320854	3.99788	10.9548	7.98686	5.79732	21.3569	33.6929	1207.99	84.8719	177.379	-383.354	35.3849	61.6026	79.6899	36.3322	47.9354	204.618	237.02	12.0329	2.02387	4.01297	6.74959	5.96059e+08	20.1875	0.254314	0.290843	12.3306	2.07393	4.12872	0.694427	5.6101	0.943587	3.19693e+08
837	-95.9	30.69	524.22	3090	24.4733	25.697	0.0464264	136	0	6.5	30	7.09104	Electricity Generation	8.39625e+09	S O PURDOM	FL	0.0677184	1.05062	10.9027	8.00375	5.82201	21.3738	33.7175	1149.1	80.2576	168.182	-392.543	26.1882	57.5384	76.0853	35.0928	46.3518	195.421	227.823	8.76402	1.67182	0.629105	1.20008	5.30949e+08	16.5063	0.22907	0.261973	8.9959	1.71605	0.649606	0.123918	0.996866	0.190162	2.85172e+08
1847	-98.5	28.81	448.82	2104	26.1851	27.4944	0.0426888	160	0	7.5	0	12.2401	Electricity Generation	9.05674e+09	BAYSIDE POWER STATION	FL	0.0437864	11.0304	10.8168	8.01891	5.84325	21.3889	33.7388	1153.39	80.4669	192.301	-368.454	50.3077	57.829	76.2062	35.5688	46.4102	219.541	251.943	9.39613	2.09352	0.755288	1.68283	4.88205e+08	19.2463	0.232108	0.265447	9.60878	2.1409	0.810939	0.180682	4.16357	0.92767	2.62235e+08
1730	-98.9	28.94	541.93	6718	25.8318	27.1233	0.0504788	2000	0	8.35	0	14.2402	Electricity Generation	1.07287e+10	W A PARISH	TX	0.155777	39.1895	10.9783	8.02086	5.83339	21.3909	33.7289	1374.96	98.6277	203.432	-357.32	61.4384	73.1184	93.0812	40.613	53.818	230.671	263.073	11.1712	2.06137	3.18486	5.87688	5.77294e+08	19.351	0.328491	0.375674	11.4158	2.1065	3.41669	0.630466	17.4936	3.22801	3.09908e+08
1882	-96.3	28.81	467.15	14887	26.6742	28.0079	0.0449697	2000	0	8.7	0	20.9073	Petroleum Refining	7.04334e+09	VALERO REFINING HOUSTON REFINERY	TX	0.354053	0.652484	10.8867	8.04015	5.86073	21.4102	33.7563	1277.69	91.2236	163.54	-397.223	21.5463	67.1515	87.6583	38.3855	51.4391	190.779	223.181	7.39132	1.58221	2.63835	5.64775	5.1429e+08	14.3719	0.291256	0.333091	7.65223	1.63807	2.7336	0.585164	2.94237	0.629854	2.76055e+08
1405	-97.1	29.44	449.3	2573.05	25.1585	26.4164	0.0410133	520	0	7.9	0	12.6844	Stationary Combustion	8.05979e+09	MBI NGLP MONT BELVIEU PLANT	TX	0.0551712	0.860538	10.81	8.04046	5.86781	21.4105	33.7633	998.029	73.5543	153.092	-407.653	11.0988	51.7713	68.6788	32.8373	43.1039	180.332	212.734	8.38498	1.86623	0.488383	1.08699	4.69043e+08	17.8768	0.231265	0.264484	8.58944	1.91174	0.503135	0.111982	0.754416	0.167909	2.51932e+08
142	-112.9	33.56	518.94	3230	25.1353	26.3921	0.0470408	240	0	0	0	16.0911	Electricity Generation	1.3678e+10	Palomar Energy Center	CA	0.0711165	100	10.9432	8.04952	5.86686	21.4195	33.7624	1186.65	83.3882	174.076	-386.645	32.0826	60.1208	78.8178	36.1099	47.5507	201.316	233.717	14.0413	2.70577	4.43382	8.54399	5.37976e+08	26.1003	0.252375	0.288625	14.2763	2.75104	4.91255	0.946649	38.3978	7.39926	2.88901e+08
1598	-99.4	29.19	494.18	2207.95	25.1517	26.4093	0.0450969	400	0	7.2	24	30.3563	Electricity Generation	1.04221e+10	W A PARISH	TX	0.0463095	4.10697	10.927	8.05852	5.87884	21.4285	33.7744	1187.85	83.3369	174.095	-386.651	32.1012	60.1892	79.1337	36.1293	47.6937	201.334	233.736	10.7795	2.1813	0.63445	1.28384	5.15744e+08	20.9009	0.248702	0.284425	11.0044	2.2268	0.663086	0.134179	1.98176	0.401019	2.7702e+08
1899	-96.4	28.69	499.06	17097	27.1926	28.5523	0.0484767	2000	0	8	0	6.85263	Petroleum Refining	7.9127e+09	VALERO REFINING HOUSTON REFINERY	TX	0.407694	0.666687	10.9575	8.06622	5.88157	21.4362	33.7771	1340.12	96.2811	200.665	-360.099	58.6714	71.4739	92.2504	40.3956	53.4552	227.904	260.306	8.48769	1.70073	3.48398	6.98108	5.54398e+08	15.3098	0.317857	0.363513	8.77409	1.75812	3.60389	0.722134	3.83363	0.76817	2.97318e+08
3245	-98.6	26.19	813.331	39024	28.8648	30.3081	0.0814123	2000	0	6.83	0	20.3732	Electricity Generation	1.94472e+10	MANATEE	FL	0.939903	100	11.0325	8.06794	5.85275	21.4379	33.7483	1641.1	119.94	181.882	-378.91	39.8882	91.4802	113.275	51.8507	62.6903	209.121	241.523	21.4347	2.63543	26.0919	32.0803	9.3106e+08	23.0219	0.439885	0.503069	21.9154	2.69453	27.3182	3.35881	85.055	10.4576	4.98137e+08
1115	-97.1	30.06	520.99	4020	24.6573	25.8902	0.0464223	289	0	6.9	0	13.7977	Stationary Combustion	9.71143e+09	MICHOUD	LA	0.0902913	3.99788	10.9397	8.07187	5.89015	21.4419	33.7857	1173.43	82.2159	171.946	-388.786	29.9525	59.2103	77.5478	35.6347	46.995	199.186	231.587	10.072	1.93325	1.04495	2.0057	5.30902e+08	18.9716	0.241054	0.275678	10.3035	1.97768	1.08408	0.20808	2.40518	0.461656	2.85104e+08
2773	-99.4	28.94	413.87	3496.14	25.9637	27.2619	0.0389215	118	3.8	6.7	26.2	25.806	Electricity Generation	8.80733e+09	W A PARISH	TX	0.0775761	39.1895	11.1138	8.10255	5.93396	21.4725	33.8295	1155.57	80.6457	171.011	-389.74	29.0172	57.9656	76.2864	35.2799	46.4446	198.25	230.652	9.11	2.20117	1.82061	4.39898	4.4512e+08	20.4664	0.233709	0.267278	9.30374	2.24798	1.98551	0.479742	12.8437	3.10332	2.39048e+08
230	-113.3	32.94	485.6	4288.33	25.4811	26.7552	0.0445985	86	0	0	24.5	46.2824	Electricity Generation	1.31239e+10	Hugo	OK	0.0968042	100	10.9552	8.14491	5.96607	21.5149	33.8616	1167.96	81.7277	171.011	-389.723	29.0176	58.8007	77.104	35.569	46.8006	198.251	230.652	13.4601	2.77185	4.55989	9.39021	5.10045e+08	26.3901	0.243486	0.27846	13.6823	2.8176	5.0188	1.03352	36.7601	7.57002	2.73855e+08
897	-92.8	30.44	509.39	4513	25.0298	26.2812	0.0461727	2000	0	8.7	0	3.84486	Stationary Combustion	6.81093e+09	BP AMERICAN PRODUCTION CO PASCAGOULA PLANT AND DESTIN PASCAGOULA COMPRESSOR STATION	MS	0.102257	0.30539	10.9605	8.14711	5.96576	21.5171	33.8613	1093.02	81.2589	168.066	-392.669	26.072	58.3361	86.1599	38.4165	50.7762	195.305	227.707	7.17381	1.40831	0.743872	1.46032	5.28048e+08	13.5855	0.269417	0.308116	7.40396	1.45349	0.768791	0.150924	0.86917	0.17063	2.83586e+08
1816	-99.3	28.81	1225.27	35305	26.1181	27.424	0.109581	2000	0	7.8	0	20.7057	Electricity Generation	2.57839e+10	W A PARISH	TX	0.849636	39.1895	11.2711	8.15584	5.92698	21.5258	33.8225	1689.1	123.979	170.245	-390.507	28.2514	94.7923	117.062	48.2889	64.3453	197.484	229.886	28.8815	2.35715	27.6749	22.5867	1.25321e+09	23.0461	0.460608	0.526768	29.543	2.41114	28.6428	2.33767	59.0761	4.82147	6.7e+08
625	-96.9	31.19	538.14	2013	23.9177	25.1136	0.0465458	28	0	6.7	24	21.3991	Stationary Combustion	9.61114e+09	TENASKA GATEWAY GENERATING STATION	TX	0.0415777	2.9517	10.9963	8.15729	5.97536	21.5273	33.8709	1142.57	79.7864	167.207	-393.505	25.2137	57.0728	75.4502	35.0226	46.0706	194.447	226.849	9.98377	1.85523	0.515433	0.957804	5.32314e+08	18.7554	0.228279	0.261069	10.2168	1.89854	0.538644	0.100094	1.51687	0.281873	2.85933e+08
2898	-99.4	27.44	406.69	4708.54	27.6468	29.0291	0.0406859	374	5.7	7.5	27.4	18.2729	Stationary Combustion	9.83206e+09	J K SPRUCE	TX	0.107004	10.3795	10.8607	8.16537	5.99335	21.5354	33.8889	1191.46	83.5192	165.896	-394.871	23.9028	60.4503	78.7297	36.1121	47.5201	193.136	225.538	10.1403	2.49338	1.39345	3.42631	4.65298e+08	21.7932	0.249649	0.285508	10.3422	2.54303	1.45648	0.358129	4.46213	1.09718	2.49837e+08
194	-113.3	33.06	536.43	4288.33	25.5505	26.828	0.0493706	640	0	8	25.5	39.5637	Electricity Generation	1.44036e+10	LAKE CATHERINE	AR	0.0968042	100	11.0407	8.17004	5.98405	21.54	33.8796	1251.73	88.6826	184.185	-376.546	42.1914	64.5883	83.1685	37.5937	49.4623	211.424	243.826	14.7763	2.75457	5.0358	9.38761	5.6462e+08	26.1704	0.280465	0.320751	15.0224	2.80044	5.54384	1.03347	40.6816	7.58376	3.03159e+08
2810	-81.6	26.69	444.74	33014.1	29.9563	31.4541	0.0473588	2000	0	0	23	11.548	Stationary Combustion	6.83526e+09	POLK	FL	0.794032	0.604313	10.945	8.17782	5.99489	21.5478	33.8904	1423.74	101.628	171.224	-389.597	29.2308	76.4878	86.4586	41.8446	50.9229	198.464	230.866	7.65571	1.72139	6.09978	13.7154	5.41613e+08	14.135	0.338158	0.38673	7.9488	1.78729	6.33525	1.42448	6.53841	1.47016	2.9006e+08
789	-91.1	30.69	443.32	2083.96	24.6353	25.8671	0.0396484	44	0	5.9	23	5.50934	Stationary Combustion	5.89309e+09	BLOCK 31 GAS PLANT	TX	0.0432999	0.309464	10.8371	8.1862	6.01614	21.5562	33.9117	943.514	69.1455	144.625	-416.107	2.63131	48.0162	64.451	31.4616	41.2454	171.864	204.266	6.21189	1.40122	0.277935	0.626938	4.53433e+08	13.6997	0.204935	0.234371	6.40996	1.4459	0.287719	0.0649009	0.375084	0.084608	2.43571e+08
1982	-98.3	28.56	436.5	8508	26.1962	27.5061	0.0411176	859	0	8.4	34	18.3262	Stationary Combustion	9.23162e+09	EQUISTAR CHEMICALS LAPORTE COMPLEX	TX	0.199223	12.3906	10.8734	8.18774	6.01495	21.5577	33.9105	1103.23	81.0538	167.573	-393.187	25.5797	58.2734	84.0909	37.7542	49.8726	194.813	227.215	9.61015	2.20164	2.28662	5.23852	4.70236e+08	20.4369	0.266469	0.304743	9.84082	2.25448	2.38235	0.545784	6.0067	1.3761	2.52368e+08
1490	-98.6	29.31	424.74	3709.69	25.2071	26.4675	0.0387693	75	8.1	7.5	25.4	11.7516	Stationary Combustion	8.10521e+09	CHANNEL ENERGY CENTER	TX	0.0827594	3.05015	11.2105	8.19141	6.02312	21.5614	33.9187	1148.49	80.112	167.968	-392.776	25.974	57.4916	75.9093	35.1827	46.2778	195.207	227.609	8.40723	1.97938	0.782133	1.84144	4.43379e+08	18.9617	0.229874	0.262892	8.60035	2.02485	0.809734	0.190642	1.65153	0.388833	2.38112e+08
1033	-94.6	30.19	417.38	5988	25.1193	26.3753	0.0379039	2000	0	6.4	0	29.5087	Titanium Dioxide Production	5.81118e+09	LOUISIANA PIGMENT CO LP	LA	0.138058	0.406058	11.1807	8.19687	6.03039	21.5669	33.9259	976.914	70.8715	148.374	-412.365	6.3801	49.5448	64.63	31.4711	41.3252	175.613	208.015	6.10386	1.46242	0.853929	2.04592	4.33483e+08	14.081	0.208062	0.237947	6.29245	1.5076	0.881474	0.211192	0.991022	0.237439	2.32762e+08
152	-112.6	33.56	537.67	4720	24.8773	26.1212	0.0480774	402	0	7.7	31.5	24.6148	Electricity Generation	1.38265e+10	Comanche (8059)	OK	0.107282	100	11.0663	8.20805	6.0239	21.5781	33.9194	1216.01	85.8013	178.688	-382.029	36.6946	62.138	81.511	36.6853	48.7323	205.928	238.329	14.2589	2.65197	5.04066	9.375	5.4983e+08	25.9332	0.264847	0.302889	14.4942	2.69574	5.5372	1.02985	39.7525	7.39346	2.952e+08
1587	-99.3	29.19	423.69	2478	25.2024	26.4625	0.0387369	144	1.3	8	24.5	28.345	Electricity Generation	8.72445e+09	W A PARISH	TX	0.0528641	4.10697	11.2204	8.20818	6.03995	21.5782	33.9355	1157.2	80.805	169.283	-391.464	27.289	58.0757	76.5351	35.2474	46.5531	196.522	228.924	9.03045	2.13138	0.593566	1.40094	4.43009e+08	20.3843	0.234763	0.268483	9.22353	2.17695	0.619422	0.146197	1.75209	0.41353	2.37945e+08
135	-113.3	33.44	584.085	3570	24.8415	26.0836	0.0523107	1216	0	7.8	0	12.2413	Electricity Generation	1.56383e+10	LAKE CATHERINE	AR	0.0793689	100	11.1148	8.21	6.02014	21.58	33.9157	1341.28	96.1735	198.321	-362.404	56.3271	70.7966	90.4489	39.8656	52.6574	225.56	257.962	16.0386	2.74593	5.09306	8.71972	5.98244e+08	26.8095	0.321183	0.367316	16.2997	2.79063	5.62728	0.963434	42.8614	7.3382	3.21245e+08
1242	-97.1	29.69	483.49	2467	25.0963	26.3511	0.0440157	380	0	6.8	0	33.7516	Stationary Combustion	8.62602e+09	MICHOUD	LA	0.0525971	2.20409	10.9765	8.21106	6.03314	21.5811	33.9287	1175.05	82.2745	172.1	-388.642	30.1069	59.3023	78.0346	35.858	47.2106	199.34	231.742	8.97565	1.85643	0.54294	1.12296	5.0338e+08	17.8308	0.240827	0.275418	9.19518	1.90183	0.564032	0.116658	1.25476	0.259521	2.70379e+08
1479	-100	29.31	528.28	3292	24.1911	25.4006	0.0462832	240	0	0	0	85.5241	Electricity Generation	1.15309e+10	W A PARISH	TX	0.0726214	4.52504	11.0112	8.21116	6.02964	21.5812	33.9252	1180.26	82.6574	172.818	-387.925	30.8243	59.6095	77.9649	35.8294	47.18	200.057	232.459	11.8903	2.25075	1.01643	1.92404	5.29311e+08	22.4637	0.24611	0.281461	12.1209	2.29441	1.05376	0.199469	2.54464	0.481684	2.84261e+08
2784	-99.9	29.06	472.946	4860.1	25.4725	26.7461	0.0435088	272	6.1	7.7	25.9	65.2616	Electricity Generation	1.03546e+10	W A PARISH	TX	0.110682	9.53079	10.9701	8.23416	6.05712	21.6042	33.9527	1182.91	82.8591	168.896	-391.851	26.9025	59.8133	78.228	35.9025	47.2962	196.136	228.537	10.6846	2.25915	1.48541	3.14076	4.97582e+08	21.473	0.246014	0.281351	10.901	2.3049	1.55004	0.32774	4.50137	0.951771	2.67168e+08
1653	-99.6	29.06	418.87	2214.84	25.4338	26.7055	0.0386547	223	2.1	6.8	32.2	39.161	Electricity Generation	9.32077e+09	W A PARISH	TX	0.0464767	9.53079	11.2419	8.2438	6.07574	21.6138	33.9713	1169.49	81.8052	171.184	-389.564	29.1903	58.913	77.3926	35.6596	46.9297	198.423	230.825	9.62655	2.29822	0.716449	1.71043	4.42069e+08	21.7761	0.241112	0.275744	9.81923	2.34422	0.761649	0.181834	3.38463	0.808038	2.37445e+08
1342	-99.3	29.44	547.33	2829	24.2652	25.4784	0.0481357	1009	0	7.6	0	49.1479	Electricity Generation	1.0954e+10	W A PARISH	TX	0.0613835	4.10697	11.0971	8.25537	6.07111	21.6254	33.9666	1261.14	89.3649	185.585	-375.155	43.5915	65.2281	85.5651	34.6892	50.5162	212.825	245.226	11.3324	2.07049	0.839991	1.53471	5.50497e+08	20.5858	0.280699	0.321017	11.5724	2.11434	0.874163	0.159714	2.28158	0.416856	2.95664e+08
1542	-99	29.19	425.68	3334	25.0524	26.305	0.0386328	125	0	7.4	0	25.6865	Electricity Generation	8.4577e+09	W A PARISH	TX	0.0736408	4.10697	11.2509	8.26115	6.09315	21.6312	33.9887	1155.9	80.7034	169.096	-391.649	27.1023	57.9885	76.3389	35.3167	46.4666	196.335	228.737	8.75953	2.05777	0.760926	1.78755	4.41819e+08	19.8261	0.23369	0.267256	8.952	2.10299	0.790693	0.185748	1.9202	0.45109	2.37282e+08
1852	-99.1	28.69	489.72	2544	26.1527	27.4603	0.046493	1800	0	7.6	29	13.5546	Electricity Generation	1.03656e+10	W A PARISH	TX	0.054466	39.1895	11.0447	8.27074	6.08889	21.6407	33.9844	1342.45	96.015	168.647	-392.109	26.6533	70.8755	90.5385	39.9831	52.7022	195.886	228.288	10.7324	2.19153	1.91513	3.91066	5.31711e+08	20.1846	0.315851	0.361218	10.9639	2.2388	2.10695	0.430235	15.0791	3.07911	2.85586e+08
207	-111.6	33.19	584.521	3000.15	24.2012	25.4112	0.0510551	325	0	0	25	9.25497	Electricity Generation	1.72165e+10	Miramar Energy Facility	CA	0.0655377	100	11.1547	8.27085	6.08259	21.6408	33.9781	1213.57	85.6285	178.293	-382.432	36.2994	61.9857	81.5515	36.984	48.7514	205.532	237.934	17.6086	3.01249	4.88243	8.35288	5.83885e+08	30.1577	0.267412	0.305823	17.8635	3.0561	5.4005	0.923919	41.7425	7.14133	3.13549e+08
191	-113.3	33.06	519.52	4288.33	25.5505	26.828	0.0478143	640	0	8	25.5	34.399	Electricity Generation	1.39496e+10	LAKE CATHERINE	AR	0.0968042	100	11.1029	8.28893	6.10515	21.6589	34.0007	1251.52	88.6718	184.162	-376.569	42.1682	64.579	83.3813	37.582	49.5557	211.401	243.803	14.3105	2.75457	4.87706	9.38761	5.46821e+08	26.1704	0.280408	0.320685	14.5489	2.80044	5.36908	1.03347	39.3992	7.58376	2.93602e+08
1883	-97.3	28.69	447.18	12051	26.1598	27.4677	0.0421709	240	0	0	0	5.64661	Electricity Generation	7.84199e+09	MULBERRY COGENERATION FACILITY	FL	0.285218	2.27587	10.9373	8.29364	6.11894	21.6636	34.0145	1167.39	81.4118	172.752	-388.009	30.7581	58.8022	76.931	35.469	46.7294	199.991	232.393	8.18692	1.83079	2.40515	5.37848	4.82282e+08	16.9754	0.234575	0.268268	8.4271	1.8845	2.48304	0.555266	3.1659	0.707969	2.58868e+08
1234	-97.9	29.69	531.18	9220	24.8793	26.1232	0.0474241	983	0	0	0	6.36867	Electricity Generation	9.87823e+09	SABINE	TX	0.216505	1.09669	11.082	8.29654	6.11337	21.6665	34.0089	1271.5	90.0721	187.295	-373.445	45.301	65.986	76.0387	38.0794	46.3339	214.534	246.936	10.3023	1.93951	2.26848	4.27064	5.4236e+08	18.9954	0.282158	0.322686	10.5708	1.99005	2.33168	0.438962	2.70166	0.508615	2.91067e+08
1517	-99	29.19	423.53	3334	25.0524	26.305	0.0384377	142	0	8	0	26.9202	Electricity Generation	8.41498e+09	W A PARISH	TX	0.0736408	4.10697	11.2713	8.30889	6.14128	21.6789	34.0368	1157.86	80.8629	169.401	-391.344	27.4072	58.1225	76.4961	35.339	46.5356	196.64	229.042	8.71529	2.05777	0.757083	1.78755	4.39587e+08	19.8261	0.234543	0.268232	8.90679	2.10299	0.7867	0.185748	1.9105	0.45109	2.36083e+08
501	-112.5	32.06	561.72	4880	23.8104	25.0009	0.048235	240	0	0	0	76.7192	Electricity Generation	1.54065e+10	Hugo	OK	0.111165	100	11.1264	8.30911	6.12473	21.6791	34.0203	1205.73	84.7454	176.825	-383.918	34.8315	61.3766	79.8727	36.4404	48.0177	204.064	236.466	15.8978	2.8302	5.28974	9.41704	5.51634e+08	28.8195	0.26149	0.299049	16.132	2.87189	5.78825	1.03045	40.1127	7.14103	2.96141e+08
1630	-99.4	29.06	458.83	3578.8	25.5222	26.7983	0.0423976	197	3.6	7.8	26	35.1556	Electricity Generation	9.68569e+09	W A PARISH	TX	0.0795825	39.1895	10.973	8.31042	6.13528	21.6804	34.0308	1166.54	81.5542	170.733	-390.015	28.7389	58.7133	77.1538	35.5675	46.8248	197.972	230.374	10.0149	2.18271	2.01039	4.38155	4.84874e+08	20.6547	0.238715	0.273003	10.226	2.22872	2.19042	0.477393	14.0182	3.05521	2.60394e+08
1508	-98.9	29.31	433.42	3334	24.8763	26.1201	0.03906	145	0	7.6	0	27.7236	Electricity Generation	8.42733e+09	W A PARISH	TX	0.0736408	4.10697	11.245	8.3161	6.14723	21.6861	34.0428	1157.83	80.8647	169.402	-391.342	27.4082	58.12	76.4522	35.3554	46.5162	196.641	229.043	8.73276	2.01485	0.760236	1.75404	4.46704e+08	19.5493	0.234379	0.268044	8.92738	2.05975	0.790334	0.182348	1.93234	0.445835	2.39907e+08
706	-95.1	30.94	533.92	2118.4	24.3766	25.5954	0.0471372	36	6.3	4.4	18.2	34.43	Stationary Combustion	8.11239e+09	BUCKEYE FLORIDA	FL	0.0441359	0.769087	11.1209	8.3337	6.15088	21.7037	34.0464	1138.36	79.3708	166.471	-394.25	24.4772	56.7694	75.0125	34.8868	45.88	193.71	226.112	8.49063	1.59024	0.401216	0.751453	5.39078e+08	15.7503	0.223939	0.256104	8.72638	1.6344	0.41519	0.0777625	0.673317	0.126108	2.8957e+08
3143	-99.4	27.19	431.809	5238	28.1437	29.5509	0.0439529	1900	0	8.6	30	35.5668	Stationary Combustion	1.06482e+10	J K SPRUCE	TX	0.119854	6.35043	11.0339	8.33868	6.16089	21.7087	34.0564	1389.01	99.7434	176.945	-383.827	34.9516	74.0671	94.0706	38.1393	54.2558	204.185	236.586	10.9779	2.54231	1.51958	3.51911	5.02661e+08	21.8396	0.336272	0.384573	11.1958	2.59277	1.57306	0.364296	3.5595	0.824324	2.69879e+08
1550	-98.8	29.19	454.71	4694.77	25.4152	26.686	0.0417891	112	3.7	6.8	26.4	14.3537	Stationary Combustion	8.84949e+09	CHANNEL ENERGY CENTER	TX	0.106669	11.0304	11.0118	8.34279	6.16875	21.7128	34.0643	1155.04	80.6234	168.971	-391.776	26.9772	57.9405	76.2854	35.2718	46.4435	196.21	228.612	9.1701	2.01669	1.31478	2.89148	4.77915e+08	19.1877	0.232554	0.265957	9.378	2.06241	1.3822	0.303974	4.66313	1.02552	2.56627e+08
1830	-98.6	28.81	408.54	2828	26.0521	27.3547	0.0386235	842	0	7.2	27	20.1529	Electricity Generation	8.18393e+09	BAYSIDE POWER STATION	FL	0.0613592	11.0304	11.2898	8.34353	6.17553	21.7135	34.0711	1229	86.6639	181.34	-379.416	39.3459	63.0396	81.9014	37.1197	48.9104	208.579	240.981	8.48799	2.07764	0.831935	2.03636	4.41712e+08	19.2161	0.26512	0.303201	8.68027	2.1247	0.885629	0.216779	3.91872	0.959201	2.37242e+08
1472	-98.1	29.31	457.81	2814.16	25.1771	26.436	0.0417895	79	4.3	7.1	26.7	7.74504	Electricity Generation	8.82826e+09	HAYS ENERGY PROJECT	TX	0.0610232	2.1097	11.0198	8.34354	6.16947	21.7135	34.065	1147.39	80.0291	167.796	-392.948	25.8028	57.4198	75.8015	32.4516	46.2307	195.036	227.438	9.15771	2.00033	0.623216	1.3613	4.77919e+08	19.1616	0.229683	0.262674	9.366	2.04583	0.644597	0.1408	1.27227	0.277903	2.56689e+08
2513	-99.5	27.81	467.15	15496.2	27.21	28.5705	0.0451389	305	5.5	7.5	28.4	23.11	Stationary Combustion	1.05315e+10	J K SPRUCE	TX	0.36884	10.3795	11.0768	8.37451	6.19489	21.7445	34.0904	1263.99	89.2864	170.068	-390.695	28.0739	65.4514	83.8421	37.5658	49.7638	197.307	229.709	11.1782	2.39284	4.4651	9.55816	5.16225e+08	21.6536	0.278271	0.31824	11.4358	2.44798	4.60551	0.985873	7.93527	1.69866	2.76778e+08
2809	-81.8	26.69	422.24	33014.1	30.0292	31.5306	0.0450935	2000	0	0	23	8.75955	Stationary Combustion	6.46834e+09	POLK	FL	0.794032	0.604313	11.0342	8.3821	6.20264	21.7521	34.0982	1420.57	101.364	169.433	-391.39	27.439	76.2722	109.275	41.43	60.9398	196.672	229.074	7.2424	1.71523	5.7706	13.6666	5.15706e+08	14.0437	0.336717	0.385082	7.52149	1.78133	5.99482	1.41977	6.18828	1.46558	2.76193e+08
1758	-98.9	28.94	411.45	6718	25.8318	27.1233	0.038325	555	0	8.34	27.5	12.567	Electricity Generation	8.1456e+09	W A PARISH	TX	0.155777	39.1895	11.3095	8.40366	6.23632	21.7737	34.1319	1210.24	85.1045	177.599	-383.154	35.6053	61.7521	80.317	36.5947	48.2144	204.838	237.24	8.48153	2.06137	2.41805	5.87688	4.38299e+08	19.351	0.2562	0.293	8.66721	2.1065	2.59405	0.630466	13.2817	3.22801	2.35292e+08
965	-96.6	30.31	433.91	2442	24.9371	26.184	0.0391931	500	0	7.59	25.1	28.8937	Petroleum and Natural Gas Systems	7.61234e+09	TARGA MIDSTREAM SERVICES LLC - LOWRY GAS PROCESSING PLANT	LA	0.0519903	2.12018	11.3113	8.41969	6.25054	21.7897	34.1461	995.945	73.4245	152.807	-407.924	10.8132	51.6112	68.6021	32.7736	43.0677	180.046	212.448	7.92429	1.82625	0.472669	1.08932	4.48227e+08	17.6792	0.230468	0.263571	8.12001	1.87136	0.491021	0.113162	1.08266	0.249511	2.40756e+08
51	-119.6	35.44	579.311	7734	24.7343	25.971	0.0511081	702	0	7.52	0	3.93245	Stationary Combustion	1.3092e+10	Outlaw Compressor Station	CO	0.180437	100	11.2389	8.43939	6.25111	21.8094	34.1466	1072.9	85.3658	165.096	-395.601	23.1023	61.5717	83.9854	37.797	49.8148	192.335	224.737	13.6583	2.35768	6.19673	10.6967	5.84491e+08	23.3678	0.281955	0.322454	13.9458	2.4073	6.74795	1.16482	43.1059	7.4409	3.13686e+08
794	-96.4	30.81	527.01	2039	24.3166	25.5325	0.0464031	1001	2.9	8.2	27	6.84371	Stationary Combustion	9.16083e+09	Permian Basin	TX	0.0422087	1.80502	11.1535	8.44613	6.26442	21.8161	34.16	1236.23	87.4269	181.863	-378.86	39.869	63.5519	82.6399	37.3827	49.2289	209.102	241.504	9.53217	1.80873	0.463507	0.879503	5.30683e+08	17.9621	0.268533	0.307104	9.7642	1.85275	0.481545	0.091373	1.07792	0.204535	2.85058e+08
934	-97	30.31	444.74	3199.92	24.5553	25.7831	0.0394894	36	0	0	21	15.3726	Stationary Combustion	8.4618e+09	PUTNAM	FL	0.0703865	1.93098	11.341	8.44874	6.27901	21.8187	34.1746	1145.56	79.9484	167.59	-393.139	25.5962	57.2857	75.5886	35.0961	46.1344	194.829	227.231	8.77187	1.97236	0.673107	1.51348	4.51615e+08	19.4233	0.229362	0.262307	8.96899	2.01668	0.694477	0.156153	1.23733	0.278214	2.42549e+08
1886	-99.1	28.69	468.87	2544	26.1527	27.4603	0.0445135	1800	0	7.6	29	19.2612	Electricity Generation	9.92431e+09	W A PARISH	TX	0.054466	39.1895	11.1315	8.46254	6.2838	21.8325	34.1793	1342.69	96.0275	189.507	-371.248	47.5138	70.8863	89.2856	39.9761	52.1522	216.747	249.149	10.2754	2.19153	1.83359	3.91066	5.09073e+08	20.1846	0.315918	0.361295	10.4971	2.2388	2.01725	0.430235	14.4371	3.07911	2.73427e+08
678	-96.6	31.06	501.925	2078	24.0047	25.2049	0.0435774	40	0	7.1	22	2.87803	Electricity Generation	8.86709e+09	Odessa-Ector Generating Station	TX	0.0431553	2.16812	11.1238	8.48274	6.30555	21.8527	34.2011	1142.62	79.8021	167.238	-393.476	25.2447	57.0955	75.5571	35.0533	46.1179	194.478	226.88	9.21572	1.83607	0.466704	0.929828	4.98367e+08	18.4918	0.228151	0.260922	9.43382	1.87953	0.485415	0.0967106	1.15813	0.230737	2.67697e+08
157	-112.6	33.56	516.09	4720	24.8773	26.1212	0.0461477	436	8.5	7.7	24	19.9575	Electricity Generation	1.32716e+10	Comanche (8059)	OK	0.107282	100	11.1709	8.49316	6.31187	21.8632	34.2074	1220.95	86.2161	179.473	-381.245	37.479	62.484	71.5211	36.8152	44.3467	206.712	239.114	13.6866	2.65197	4.83835	9.375	5.27762e+08	25.9332	0.267065	0.305425	13.9125	2.69574	5.31496	1.02985	38.157	7.39346	2.83352e+08
2519	-99.5	27.81	459.64	15496.2	27.21	28.5705	0.0444133	305	3.7	0	30.2	23.8417	Stationary Combustion	1.03622e+10	J K SPRUCE	TX	0.36884	10.3795	11.1184	8.49898	6.32054	21.869	34.2161	1264.03	89.2882	178.934	-381.829	36.9401	65.4529	73.4375	37.5614	45.1961	206.173	238.575	10.9984	2.39284	4.39332	9.55816	5.07926e+08	21.6536	0.27828	0.318251	11.2519	2.44798	4.53147	0.985873	7.80771	1.69866	2.72329e+08
1004	-97.5	30.19	813.611	13519.2	24.6422	25.8743	0.071323	1690	0	6.6	0	9.32451	Stationary Combustion	1.56166e+10	GRANT PRIDECO LP	TX	0.320854	3.99788	11.4591	8.50973	6.30136	21.8797	34.1969	1404.63	101.012	208.218	-352.514	66.224	75.1713	95.41	38.3522	54.8367	235.457	267.859	16.4664	2.02387	5.49154	6.74959	8.15675e+08	20.1875	0.340596	0.389518	16.8737	2.07393	5.64993	0.694427	7.67712	0.943587	4.37483e+08
49	-119.8	35.44	433.974	7807	24.4908	25.7153	0.0379401	460	0	8.3	0	4.1794	Stationary Combustion	9.6316e+09	Aera Energy Coalinga	CA	0.182209	100	11.3536	8.51666	6.35014	21.8867	34.2457	1037.11	76.8788	159.469	-401.23	17.4754	54.4769	81.3177	35.2085	48.6441	186.708	219.11	10.0239	2.3098	4.5971	10.593	4.33897e+08	23.102	0.252414	0.28867	10.2368	2.35886	5.00663	1.15367	31.9974	7.37311	2.32868e+08
848	-96.5	30.69	513.269	2078	24.3392	25.5562	0.0452243	800	0	7.9	0	9.7821	Stationary Combustion	9.25573e+09	Permian Basin	TX	0.0431553	1.80502	11.2003	8.51772	6.33784	21.8877	34.2334	1220.49	86.141	179.388	-381.335	37.3947	62.4622	71.3818	37.1465	44.2865	206.628	239.03	9.61712	1.8737	0.474643	0.924745	5.17201e+08	18.5945	0.262085	0.29973	9.84325	1.91776	0.492435	0.095941	1.07365	0.209179	2.77813e+08
847	-95.9	30.69	479.71	3090	24.4733	25.697	0.0424844	136	0	6.5	30	6.08057	Electricity Generation	7.68335e+09	S O PURDOM	FL	0.0677184	1.05062	11.1061	8.5261	6.3508	21.8961	34.2463	1149.07	80.2564	168.179	-392.546	26.1853	57.5373	75.919	35.0946	46.2788	195.418	227.82	8.01989	1.67182	0.57569	1.20008	4.85868e+08	16.5063	0.229064	0.261966	8.23209	1.71605	0.594449	0.123918	0.912225	0.190162	2.60959e+08
807	-97.1	30.69	439.12	2841.71	24.4721	25.6957	0.0388523	33	7.5	7	24.1	19.6534	Stationary Combustion	8.0707e+09	PUTNAM	FL	0.061692	2.27079	11.419	8.52869	6.36023	21.8987	34.2558	1143.92	79.8408	167.361	-393.361	25.3675	57.1679	75.4912	35.0791	46.0905	194.601	227.002	8.37793	1.90789	0.58128	1.32374	4.44329e+08	18.8553	0.228441	0.261253	8.57208	1.9521	0.601933	0.137077	1.23005	0.280116	2.38648e+08
2769	-99.6	28.94	435.631	3599.47	25.7028	26.988	0.040533	197	5.7	7.9	30.2	48.1252	Electricity Generation	9.53725e+09	W A PARISH	TX	0.0800841	9.53079	11.0755	8.53538	6.36365	21.9054	34.2592	1168.48	81.6954	171.01	-389.739	29.0159	58.8345	77.2227	35.6183	46.8552	198.249	230.651	9.85133	2.26139	1.07105	2.45861	4.6355e+08	21.2519	0.239871	0.274326	10.0531	2.30772	1.12516	0.258282	3.87511	0.889541	2.48939e+08
525	-111.6	32.06	457.04	2210	23.8564	25.0492	0.0395678	62	0	7.4	20	51.1288	Electricity Generation	1.09787e+10	UNION POWER STATION	AR	0.0463592	100	11.3944	8.541	6.37111	21.911	34.2667	1157.86	80.8855	169.389	-391.35	27.3953	58.0983	76.6557	35.3698	46.6047	196.628	229.03	11.2902	2.47029	3.41293	7.46745	4.52512e+08	24.9501	0.238805	0.273106	11.4876	2.51349	3.81124	0.833896	31.9816	6.99755	2.43046e+08
1996	-96.8	28.69	429.776	3041.48	26.6162	27.947	0.0415468	2000	0	0	0	5.74891	Petroleum Refining	7.37967e+09	HOUSTON REFINING	TX	0.0665409	1.09935	11.1095	8.54177	6.36814	21.9118	34.2637	1282.21	91.8783	155.94	-404.822	13.946	67.4787	88.286	38.6376	51.7144	183.179	215.581	7.70786	1.79346	0.546242	1.27099	4.75144e+08	16.2222	0.296784	0.339413	7.91454	1.84155	0.564487	0.131345	0.889666	0.207007	2.55202e+08
1050	-97.6	30.19	474.59	5010	24.5448	25.7721	0.0420076	36	0	7.3	21	5.90497	Stationary Combustion	9.22238e+09	SANDOW STATION	TX	0.11432	3.0939	11.1402	8.54398	6.36955	21.914	34.2651	1149.92	80.2963	168.281	-392.45	26.287	57.5957	75.9223	35.1659	46.2811	195.52	227.922	9.54292	2.01077	1.18586	2.49871	4.80415e+08	19.8639	0.231216	0.264427	9.75222	2.05487	1.22254	0.257599	2.14756	0.452509	2.57954e+08
676	-96.6	31.06	446.89	2078	24.0047	25.2049	0.0387992	40	0	7.1	22	7.20138	Electricity Generation	7.89484e+09	Odessa-Ector Generating Station	TX	0.0431553	2.16812	11.4255	8.54695	6.37859	21.917	34.2741	1142.82	79.8126	167.26	-393.454	25.2668	57.1044	75.5574	35.0433	46.1181	194.5	226.902	8.20524	1.83607	0.415531	0.929828	4.43722e+08	18.4918	0.228207	0.260985	8.39942	1.87953	0.432191	0.0967106	1.03114	0.230737	2.38344e+08
1247	-97.8	29.81	460.984	2060	24.7828	26.0219	0.0414342	240	0	7.6	22	11.307	Electricity Generation	8.78039e+09	SABINE	TX	0.0427184	0.981956	11.1288	8.56072	6.38729	21.9307	34.2828	1163.93	81.4239	170.424	-390.314	28.4302	58.5575	76.8369	35.5487	46.684	197.663	230.065	9.11064	1.97634	0.418904	0.908718	4.73857e+08	19.2266	0.237326	0.271415	9.31745	2.02121	0.431744	0.0936569	0.721434	0.156499	2.5453e+08
485	-111.3	32.31	446.09	2630	23.9502	25.1477	0.0387081	412	0	0	0	15.2832	Cement Production	1.18778e+10	CEMEX SOUTHEAST LLC	GA	0.0565534	100	11.4289	8.5659	6.39774	21.9359	34.2933	1118.93	80.7706	167.856	-392.884	25.8622	57.8554	72.8245	36.8143	44.9228	195.095	227.497	12.1787	2.73009	3.51548	7.88065	4.4268e+08	27.5112	0.25898	0.296179	12.3717	2.77336	3.90681	0.875789	31.4626	7.05296	2.37743e+08
2779	-100.3	29.06	488.47	2111.51	25.1086	26.364	0.0445006	1100	0	7.08	29.5	97.1265	Electricity Generation	1.10387e+10	W A PARISH	TX	0.0439687	20.4535	11.2085	8.58001	6.4013	21.95	34.2968	1283.8	91.1803	169.049	-391.695	27.0557	66.744	84.2213	38.4156	49.9269	196.289	228.691	11.3911	2.33199	1.16554	2.3861	5.08925e+08	22.3826	0.291751	0.333657	11.613	2.37742	1.26485	0.25894	7.74524	1.58561	2.73357e+08
84	-114.6	33.69	503.81	2160	25.05	26.3026	0.0456422	38	0	7.3	23	7.58581	Petroleum and Natural Gas Systems	1.39057e+10	East Rockpile Gas Plant	OK	0.0451456	100	11.2146	8.59745	6.41692	21.9675	34.3125	964.307	70.9127	147.914	-412.811	5.92078	49.4491	65.9773	31.9545	41.9143	175.154	207.556	14.2648	2.83137	3.9771	7.89405	5.21981e+08	27.3281	0.224039	0.256219	14.4928	2.87665	4.43626	0.880541	36.9308	7.3303	2.80354e+08
465	-111.3	32.31	484.85	2630	23.9502	25.1477	0.0420714	412	0	0	0	12.0019	Cement Production	1.29099e+10	CEMEX SOUTHEAST LLC	GA	0.0565534	100	11.187	8.62479	6.45022	21.9948	34.3458	1118.78	80.7627	167.839	-392.9	25.8455	57.8486	81.3259	36.7392	48.655	195.079	227.48	13.2368	2.73009	3.82093	7.88065	4.81143e+08	27.5112	0.258938	0.29613	13.4466	2.77336	4.24627	0.875789	34.1963	7.05296	2.584e+08
988	-94.6	30.19	432.76	5988	25.1193	26.3753	0.0393006	2000	0	7.7	0	26.1906	Electricity Generation	6.02532e+09	J R KELLY	FL	0.138058	0.406058	11.4316	8.62531	6.45597	21.9953	34.3515	1136.98	79.1481	166.162	-394.577	24.1687	56.6822	74.5576	34.7546	45.6835	193.402	225.804	6.32878	1.46242	0.885395	2.04592	4.49456e+08	14.081	0.221075	0.252829	6.52432	1.5076	0.913956	0.211192	1.02754	0.237439	2.41339e+08
1515	-99.8	29.19	538.9	4406	24.9962	26.246	0.0486703	2000	0	7.7	0	74.1091	Electricity Generation	1.20727e+10	W A PARISH	TX	0.0996602	4.52504	11.284	8.62994	6.44493	21.9999	34.3405	1409.43	101.541	208.774	-351.971	66.78	75.4375	96.0714	42.0879	55.1292	236.013	268.415	12.4436	2.30906	1.40096	2.59966	5.56611e+08	22.3559	0.346623	0.39641	12.6858	2.35401	1.44671	0.268456	3.01424	0.559332	2.98876e+08
1056	-101.8	30.06	852.693	23268	24.265	25.4783	0.0718553	240	0	0	0	27.143	Petroleum and Natural Gas Systems	2.17575e+10	VIOSCA KNOLL 786 A	LA	0.557476	41.8483	11.4954	8.63854	6.42985	22.0085	34.3254	1176.05	88.1077	181.1	-379.623	39.1063	64.0429	90.8942	39.984	52.8526	208.339	240.741	23.3026	2.73283	15.1866	17.8102	8.21763e+08	28.3569	0.314556	0.359737	23.7134	2.781	15.7038	1.84167	37.0475	4.34477	4.40037e+08
1231	-94.6	29.81	406.27	2150	25.7803	27.0693	0.0380463	325	0	0	0	22.2921	Stationary Combustion	5.48769e+09	TARGA MIDSTREAM SERVICES LLC - STINGRAY GAS PLANT	LA	0.0449029	0.337386	11.4511	8.64388	6.47707	22.0139	34.3726	962.061	70.567	147.438	-413.307	5.44391	49.2793	66.0818	32.4238	41.9636	174.677	207.079	5.79324	1.42596	0.269507	0.663369	4.35111e+08	13.3144	0.212054	0.242513	5.98301	1.47267	0.279292	0.0687455	0.370692	0.0912426	2.33728e+08
148	-112.6	33.56	492.11	4720	24.8773	26.1212	0.0440035	240	0	0	0	21.5978	Electricity Generation	1.26549e+10	Comanche (8059)	OK	0.107282	100	11.2249	8.6462	6.46834	22.0162	34.3639	1191.43	83.7737	174.84	-385.878	32.8463	60.4453	78.8891	36.3428	47.5813	202.079	234.481	13.0506	2.65197	4.61354	9.375	5.0324e+08	25.9332	0.254009	0.290493	13.266	2.69574	5.068	1.02985	36.384	7.39346	2.70186e+08
487	-112.5	32.06	522.94	4880	23.8104	25.0009	0.044905	240	0	0	0	70.3511	Electricity Generation	1.43428e+10	Hugo	OK	0.111165	100	11.271	8.67593	6.4966	22.0459	34.3921	1205.48	84.7325	176.797	-383.946	34.8035	61.3655	80.4182	36.4962	48.2572	204.036	236.438	14.8002	2.8302	4.92455	9.41704	5.1355e+08	28.8195	0.26142	0.29897	15.0183	2.87189	5.38864	1.03045	37.3434	7.14103	2.75696e+08
74	-114.4	33.81	604.721	2080	24.7946	26.0344	0.0542124	114	0	7.8	23	17.9053	Petroleum and Natural Gas Systems	1.73063e+10	San Bois Treating Facility	OK	0.0432039	100	11.4445	8.6818	6.48961	22.0518	34.3851	979.221	72.1545	150.253	-410.468	8.25947	50.468	67.0914	32.8813	42.4027	177.492	209.894	17.7327	2.93239	4.7251	7.81369	6.19993e+08	28.6015	0.231645	0.264917	18.0038	2.97721	5.26994	0.871468	43.8661	7.25394	3.32996e+08
1507	-97.8	29.31	445.24	2132.18	25.3023	26.5674	0.0409022	600	0	7.1	0	3.55699	Petrochemical Production	8.38942e+09	OXY VINYLS LP - DEER PARK VCM FACILITY	TX	0.0444703	0.97372	11.1854	8.70157	6.52913	22.0716	34.4247	1167.71	82.6253	172.382	-388.366	30.3883	59.5782	79.7276	36.4515	47.9548	199.621	232.023	8.71505	1.95738	0.416646	0.935777	4.67772e+08	18.631	0.24926	0.285063	8.91897	2.00318	0.429634	0.0964948	0.713205	0.160184	2.51261e+08
1186	-96.8	29.81	405.63	4500	24.898	26.1429	0.0365271	96	0	7.4	0	3.82259	Stationary Combustion	7.18553e+09	WATERFORD 1 & 2	LA	0.101942	2.20409	11.429	8.71632	6.55282	22.0863	34.4484	1140.55	79.4772	166.753	-393.988	24.7595	56.9512	75.0921	34.9159	45.9185	193.993	226.394	7.46811	1.84111	0.820105	2.0218	4.17738e+08	17.8775	0.225595	0.257998	7.64999	1.88595	0.846552	0.2087	1.41963	0.34998	2.24325e+08
1082	-91.8	30.06	508.13	29353	25.9609	27.2589	0.0466834	1115	0	7.3	0	21.2782	Electricity Generation	6.26711e+09	BIG CAJUN 2	LA	0.70517	0.405254	11.2575	8.72217	6.54022	22.0922	34.4358	1322.59	93.7691	195.227	-365.522	53.2332	69.497	87.7863	38.9478	51.4928	222.466	254.868	6.97716	1.3731	4.9339	9.7099	5.33888e+08	13.0686	0.295935	0.338442	7.269	1.43054	5.14152	1.01185	5.27586	1.03829	2.8601e+08
1200	-97.3	29.81	420.64	2805	24.8086	26.049	0.0378139	577	0	7.3	22	29.5486	Stationary Combustion	7.67023e+09	MICHOUD	LA	0.060801	3.99788	11.4881	8.72277	6.55646	22.0928	34.452	1198.68	84.2446	175.843	-384.895	33.8493	60.9376	70.9973	36.5007	44.1203	203.082	235.484	7.9691	1.89452	0.594928	1.41434	4.32453e+08	18.4277	0.25174	0.287899	8.15774	1.93936	0.621265	0.147695	1.69756	0.403565	2.32271e+08
112	-112.4	33.69	515.84	3070	24.0071	25.2075	0.0446693	240	0	0	0	19.5965	Electricity Generation	1.47105e+10	Blythe Energy	CA	0.067233	100	11.3044	8.72705	6.54808	22.0971	34.4436	1197.91	84.3328	175.839	-384.882	33.8452	60.8941	79.5253	36.4528	47.8612	203.078	235.48	15.0538	2.9183	4.27417	8.28585	5.10854e+08	29.4678	0.25996	0.2973	15.2769	2.96155	4.72782	0.916527	36.5242	7.08052	2.7433e+08
1020	-93	30.19	458.787	17749	25.4416	26.7137	0.0417212	2000	0	7.7	0	9.50432	Stationary Combustion	5.84425e+09	CABOT CORP - VILLE PLATTE PLANT	LA	0.423519	0.373328	11.1878	8.7274	6.55357	22.0974	34.4491	1174.36	86.6328	179.371	-381.37	37.3778	63.1917	90.2647	39.5188	52.5794	206.611	239.013	6.29817	1.37279	2.67877	5.83882	4.77139e+08	13.1999	0.290973	0.332767	6.54988	1.42765	2.78689	0.607447	2.89762	0.631583	2.55899e+08
874	-97	30.69	469.578	5459.41	24.5397	25.7667	0.0414986	30	3.6	6.7	24.5	15.4399	Stationary Combustion	8.50802e+09	PUTNAM	FL	0.125228	2.27079	11.2328	8.73068	6.55716	22.1007	34.4527	1148.3	80.1865	168.058	-392.664	26.0643	57.4747	75.7032	35.0628	46.1835	195.297	227.699	8.8246	1.87926	1.17391	2.49992	4.74593e+08	18.594	0.229649	0.262635	9.03149	1.92332	1.20906	0.257478	1.87974	0.400304	2.54822e+08
83	-114.6	33.69	451.4	2160	25.05	26.3026	0.0408941	38	0	7.3	23	4.87191	Electricity Generation	1.24591e+10	JEFFERIES	SC	0.0451456	100	11.2127	8.73877	6.56634	22.1088	34.4619	1154.81	80.7643	169.081	-391.644	27.0878	57.9342	76.3819	35.3058	46.482	196.321	228.723	12.7808	2.83137	3.56338	7.89405	4.6768e+08	27.3281	0.239544	0.273951	12.9852	2.87665	3.97476	0.880541	33.089	7.3303	2.51189e+08
850	-95	30.69	454.174	2050	24.6707	25.9042	0.0406139	470	0	0	0	12.7341	Stationary Combustion	6.75784e+09	MOBILE BAY NGL RECOVERY PLANT	AL	0.0424757	0.796784	11.2076	8.74949	6.57758	22.1195	34.4731	981.766	72.2826	150.635	-410.092	8.64098	50.6489	67.4672	32.9075	42.5687	177.874	210.276	7.08399	1.55975	0.32453	0.714549	4.64475e+08	15.2516	0.222719	0.254709	7.287	1.60445	0.336338	0.0740549	0.566755	0.124788	2.495e+08
233	-112.9	32.94	409.52	2152.84	25.5449	26.8222	0.0378698	700	0	0	25	17.8735	Electricity Generation	1.10324e+10	Hugo	OK	0.0449719	100	11.5258	8.78817	6.62174	22.1582	34.5173	1250.74	88.6431	184.058	-376.675	42.0644	64.5417	83.5427	35.1162	49.627	211.297	243.699	11.3306	2.76681	3.27508	7.99736	4.33093e+08	26.1621	0.280807	0.321141	11.5197	2.81298	3.65604	0.892762	30.6175	7.47642	2.32616e+08
1192	-97.1	29.81	410.47	2805	24.9813	26.2304	0.0371586	577	0	7.3	22	28.3588	Stationary Combustion	7.31036e+09	MICHOUD	LA	0.060801	2.20409	11.507	8.80712	6.64221	22.1771	34.5377	1195.72	83.997	175.38	-385.357	33.3868	60.7346	79.5798	36.5232	47.8881	202.62	235.022	7.60438	1.8526	0.522164	1.27211	4.24959e+08	17.8944	0.250028	0.285941	7.78975	1.89776	0.54149	0.131919	1.12459	0.273975	2.28248e+08
1272	-100.8	29.56	590.111	2670	23.8875	25.0818	0.0510495	240	0	0	0	56.3319	Petroleum and Natural Gas Systems	1.3887e+10	PLAQUEMINE GAS PLANT	LA	0.0575243	100	11.4849	8.83646	6.64821	22.2065	34.5437	992.904	73.1735	152.269	-408.464	10.2753	51.3737	68.041	32.6567	42.8217	179.508	211.91	14.2863	2.42095	4.5498	7.71008	5.8382e+08	24.4703	0.234143	0.267775	14.541	2.46412	5.06629	0.858532	41.4088	7.01713	3.13553e+08
1863	-97.1	28.81	577.771	23454	26.0273	27.3287	0.0531603	2000	0	7.59	0	6.94674	Electricity Generation	9.91277e+09	MULBERRY COGENERATION FACILITY	FL	0.56199	1.09935	11.4538	8.85266	6.66188	22.2227	34.5574	1457.74	105.019	191.449	-369.311	49.4557	78.8392	98.0902	42.2722	56.0182	218.689	251.091	10.7652	1.86322	6.09259	10.545	6.0796e+08	17.707	0.359049	0.410622	11.0801	1.91773	6.2752	1.08611	6.69032	1.15795	3.25781e+08
1372	-96.8	29.44	529.38	21151	25.0689	26.3223	0.0469475	2000	0	7.84	0	17.6092	Petroleum and Natural Gas Systems	9.07276e+09	MONT BELVIEU COMPLEX	TX	0.506092	0.860538	11.3548	8.85662	6.67424	22.2266	34.5698	1260.5	94.7587	194.246	-366.501	52.2525	69.8811	88.6057	42.2778	51.8522	221.486	253.887	9.78584	1.84855	4.98204	9.41108	5.36909e+08	18.2263	0.343495	0.392833	10.0618	1.90067	5.1256	0.968225	5.41261	1.02244	2.87762e+08
238	-112.9	32.94	486.81	2152.84	25.5449	26.8222	0.0450171	1672	0	0	0	14.6164	Electricity Generation	1.31146e+10	Hugo	OK	0.0449719	100	11.386	8.86684	6.6873	22.2368	34.5828	1394.59	100.548	206.628	-354.105	64.6342	74.473	95.2751	38.4101	54.7776	233.867	266.269	13.4691	2.76681	3.8932	7.99736	5.14832e+08	26.1621	0.344449	0.393924	13.6939	2.81298	4.34606	0.892762	36.396	7.47642	2.76518e+08
1571	-99.4	29.31	443.813	2829	24.749	25.9865	0.0398112	150	0	7.39	23.1	41.6705	Electricity Generation	9.15978e+09	W A PARISH	TX	0.0613835	4.10697	11.241	8.87692	6.70656	22.2469	34.6021	1160.98	81.1174	169.872	-390.871	27.8788	58.3233	77.1407	35.4931	46.8183	197.112	229.514	9.47249	2.13434	0.700856	1.57917	4.55295e+08	20.8051	0.236707	0.270707	9.67094	2.17906	0.729114	0.164284	1.89313	0.426562	2.44532e+08
158	-112.8	33.44	411.25	2221.73	25.0006	26.2506	0.0371739	240	0	0	0	13.7423	Electricity Generation	1.05822e+10	Comanche (8059)	OK	0.0466439	100	11.561	8.889	6.72407	22.259	34.6196	1181.9	83.0031	173.33	-387.393	31.3361	59.795	78.6035	36.0346	47.4568	200.569	232.971	10.8752	2.64442	3.22196	7.83455	4.25134e+08	25.5806	0.250245	0.28619	11.061	2.68961	3.59623	0.874462	30.0621	7.30992	2.2834e+08
936	-96.3	30.31	565.52	4668	24.7648	26.0031	0.0505966	2000	0	0	0	25.3116	Pulp and Paper Manufacturing	9.43254e+09	GEORGIA-PACIFIC PORT HUDSON OPERATIONS	LA	0.106019	1.59298	11.499	8.89898	6.71134	22.269	34.6069	1345.86	95.9222	198.407	-362.324	56.4138	70.7984	89.797	39.6679	52.3725	225.647	258.049	9.82483	1.73731	1.10048	1.94596	5.78641e+08	16.9792	0.31044	0.355031	10.077	1.7819	1.13513	0.200723	1.70885	0.302172	3.10729e+08
1377	-99.4	29.44	495.02	2829	24.1194	25.3254	0.0432793	1009	0	7.6	0	48.1509	Electricity Generation	9.97358e+09	W A PARISH	TX	0.0613835	4.10697	11.3588	8.92325	6.74658	22.2932	34.6421	1263.2	89.5391	185.91	-374.831	43.9164	65.3715	84.5189	35.1356	50.0569	213.149	245.551	10.3136	2.08346	0.762885	1.54112	4.94957e+08	20.8373	0.281841	0.322323	10.5294	2.12706	0.793609	0.160318	2.05903	0.415948	2.65834e+08
1369	-99.1	29.44	466.73	2694	24.263	25.4761	0.0410552	585	0	6.7	0	38.7908	Electricity Generation	9.19709e+09	W A PARISH	TX	0.0581068	4.10697	11.3223	8.92578	6.75305	22.2958	34.6486	1209.58	85.1353	177.52	-383.221	35.5259	61.6801	80.3839	36.8168	48.2415	204.759	237.161	9.52067	2.03986	0.676348	1.44912	4.69522e+08	20.2774	0.257907	0.294952	9.72542	2.08373	0.704827	0.151014	1.90525	0.408212	2.52179e+08
870	-97.1	30.56	410.993	2841.71	24.5131	25.7388	0.0364381	33	7.5	7	24.1	12.6885	Stationary Combustion	7.5345e+09	PUTNAM	FL	0.061692	2.27079	11.5603	8.93375	6.77043	22.3037	34.666	1143.4	79.7936	167.277	-393.448	25.2835	57.139	75.4135	35.0082	46.0568	194.517	226.918	7.82259	1.90334	0.543017	1.32123	4.16719e+08	18.7719	0.228137	0.260906	8.00462	1.94763	0.562383	0.136835	1.15147	0.280167	2.23819e+08
286	-113.3	32.81	448.3	3833.68	25.2433	26.5055	0.0408673	542	0	7.7	26.5	43.433	Electricity Generation	1.16387e+10	Hugo	OK	0.085769	100	11.3286	8.95183	6.77947	22.3218	34.675	1232.43	87.0523	181.113	-379.624	39.1192	63.2527	81.9211	37.1064	48.9158	208.352	240.754	11.9504	2.6657	4.00939	8.94353	4.67373e+08	25.5692	0.271576	0.310584	12.154	2.71113	4.42795	0.987719	33.5162	7.47628	2.50965e+08
629	-96.6	31.19	493.98	3884	23.824	25.0152	0.0424324	400	0	7.6	0	12.1119	Electricity Generation	8.7681e+09	Odessa-Ector Generating Station	TX	0.0869903	2.16812	11.3605	8.96739	6.79219	22.3374	34.6877	1185.62	83.3268	173.988	-386.722	31.9946	60.0537	79.2216	36.0443	47.726	201.228	233.629	9.09944	1.84206	0.858746	1.73842	4.85272e+08	18.7512	0.246883	0.282345	9.31157	1.88501	0.886238	0.179407	1.54113	0.311982	2.60606e+08
1575	-99.9	29.19	420.8	9799.28	25.0318	26.2834	0.0376883	230	3.5	7.8	28.3	73.0643	Electricity Generation	9.26981e+09	W A PARISH	TX	0.230565	4.52504	11.6066	8.97212	6.80616	22.3421	34.7017	1215.08	85.3668	178.294	-382.45	36.3005	62.0255	79.7516	36.5319	47.9647	205.533	237.935	9.66418	2.29662	2.35276	5.59116	4.31017e+08	22.4218	0.259091	0.296306	9.87527	2.34678	2.41806	0.574633	3.63098	0.862875	2.31263e+08
137	-112.9	33.56	404.75	3230	25.1353	26.3921	0.0366897	240	0	0	0	17.3972	Electricity Generation	1.06682e+10	Palomar Energy Center	CA	0.0711165	100	11.5857	8.97593	6.81207	22.3459	34.7076	1186.74	83.3937	174.087	-386.634	32.0937	60.1254	78.7179	36.0445	47.5069	201.327	233.729	10.9516	2.70577	3.45818	8.54399	4.19597e+08	26.1003	0.252404	0.288658	11.1349	2.75104	3.83157	0.946649	29.9485	7.39926	2.2533e+08
770	-96.9	30.81	458.03	2331.95	24.4167	25.6376	0.0404605	138	2.3	6.6	25.6	24.2953	Stationary Combustion	8.17216e+09	PUTNAM	FL	0.0493192	2.27079	11.338	8.98081	6.80919	22.3508	34.7047	1153.02	80.5932	168.791	-391.93	26.7974	57.7914	76.0005	35.2599	46.3138	196.03	228.432	8.49464	1.8546	0.486044	1.06116	4.62721e+08	18.358	0.23221	0.265564	8.69695	1.89877	0.505062	0.110268	1.15922	0.253088	2.48543e+08
1067	-96.8	30.19	436.2	2028	24.8617	26.1048	0.0393126	62	0	7.1	0	18.9483	Stationary Combustion	7.84236e+09	Sonora Gas Plant	TX	0.0419417	1.93098	11.6435	8.98653	6.81714	22.3565	34.7127	952.926	69.9077	146.069	-414.665	4.0749	48.6522	65.1718	31.7114	41.562	173.308	205.71	8.15654	1.86991	0.397536	0.911361	4.49594e+08	18.142	0.212036	0.242492	8.35289	1.91492	0.413243	0.094737	0.953748	0.218649	2.415e+08
815	-97	30.69	414.41	5459.41	24.5397	25.7667	0.0366232	113	0	0	0	16.4778	Stationary Combustion	7.50847e+09	PUTNAM	FL	0.125228	2.27079	11.6086	9.01756	6.85386	22.3876	34.7494	1157.29	80.9225	169.466	-391.257	27.4719	58.0938	76.3432	35.2904	46.4645	196.705	229.107	7.78785	1.87926	1.03599	2.49992	4.18836e+08	18.594	0.233583	0.267134	7.97044	1.92332	1.06701	0.257478	1.6589	0.400304	2.24884e+08
1484	-98	29.31	431.77	4362.31	25.0109	26.2614	0.0390664	1624	0	8.39	0	21.2171	Electricity Generation	8.30413e+09	HAYS ENERGY PROJECT	TX	0.0985998	2.1097	11.6675	9.05782	6.88895	22.4278	34.7845	1322.24	94.3592	195.193	-365.553	53.1989	69.4734	89.0667	39.4068	52.0543	222.432	254.834	8.60529	1.99302	0.908667	2.10451	4.46777e+08	19.2608	0.306111	0.35008	8.79973	2.03806	0.935931	0.216766	1.52259	0.352638	2.39916e+08
517	-111.1	32.19	468.4	2570	23.8431	25.0353	0.0404821	215	0	0	0	19.2646	Electricity Generation	1.19318e+10	UNION POWER STATION	AR	0.0550971	100	11.3793	9.06028	6.88864	22.4303	34.7842	1183.43	83.0435	173.463	-387.276	31.4689	59.8949	78.6742	36.0695	47.4907	200.702	233.104	12.2475	2.61475	3.63109	7.7521	4.62968e+08	26.4544	0.2513	0.287396	12.4494	2.65786	4.04013	0.862539	32.8594	7.01524	2.48644e+08
2225	-97.9	28.31	434.74	7967	26.4308	27.7523	0.041451	2000	0	7.95	0	24.2948	Stationary Combustion	8.17404e+09	OLD OCEAN GAS PLANT	TX	0.186092	12.3906	11.4034	9.07058	6.89717	22.4406	34.7927	1170.32	87.4875	211.05	-349.717	69.0568	63.65	91.6254	40.2417	53.1815	238.29	270.692	8.56955	1.97119	1.9698	4.53097	4.74049e+08	18.0774	0.305324	0.349179	8.76705	2.01662	2.0568	0.473109	5.71109	1.31368	2.54453e+08
103	-112.8	33.69	456.89	3240	24.7475	25.9849	0.0407694	240	0	0	0	38.5901	Electricity Generation	1.13368e+10	Blythe Energy	CA	0.0713592	100	11.4029	9.07699	6.90481	22.447	34.8004	1184.88	83.2399	173.792	-386.924	31.798	59.9758	78.5744	35.93	47.4428	201.031	233.433	11.6527	2.55044	3.8088	8.33635	4.66254e+08	24.9922	0.250868	0.286902	11.8565	2.59504	4.22381	0.924469	33.2453	7.27642	2.50389e+08
134	-112.9	33.56	438.13	3230	25.1353	26.3921	0.0397156	240	0	0	0	17.092	Electricity Generation	1.1548e+10	Palomar Energy Center	CA	0.0711165	100	11.364	9.09898	6.92882	22.469	34.8244	1186.71	83.3921	174.084	-386.638	32.0905	60.1241	78.6952	36.0379	47.4969	201.324	233.725	11.8548	2.70577	3.74338	8.54399	4.54201e+08	26.1003	0.252395	0.288649	12.0531	2.75104	4.14756	0.946649	32.4184	7.39926	2.43913e+08
466	-111.3	32.31	414.79	2630	23.9502	25.1477	0.0359921	412	0	0	0	15.9321	Cement Production	1.10444e+10	CEMEX SOUTHEAST LLC	GA	0.0565534	100	11.6363	9.10747	6.94517	22.4775	34.8407	1118.97	80.7729	167.86	-392.879	25.8669	57.8573	81.338	36.8181	48.6603	195.1	227.502	11.3241	2.73009	3.26882	7.88065	4.11619e+08	27.5112	0.258992	0.296193	11.5036	2.77336	3.63269	0.875789	29.255	7.05296	2.21062e+08
2795	-100.4	29.19	421.696	2592	24.7996	26.0396	0.037907	1100	0	7.08	29.5	110.755	Electricity Generation	9.89746e+09	W A PARISH	TX	0.0556311	10.188	11.709	9.11209	6.94559	22.4821	34.8411	1295.99	92.1847	167.842	-392.902	25.8481	67.5719	86.8031	38.6476	51.0602	195.081	227.483	10.1946	2.41753	0.849168	2.01369	4.33518e+08	23.516	0.297865	0.340649	10.3836	2.46234	0.897653	0.212867	3.64709	0.864863	2.32836e+08
932	-96	30.44	437.33	6740.7	24.5014	25.7264	0.0385914	240	0	0	0	5.81551	Pulp and Paper Manufacturing	7.2511e+09	GEORGIA-PACIFIC PORT HUDSON OPERATIONS	LA	0.156328	1.05062	11.7571	9.13796	6.97006	22.508	34.8656	1156.76	80.4676	168.801	-391.928	26.8071	57.7674	75.202	34.9507	45.9647	196.04	228.442	7.54205	1.72457	1.20864	2.76368	4.41345e+08	17.0888	0.227598	0.26029	7.79922	1.78337	1.25282	0.286469	1.54135	0.352444	2.36942e+08
811	-95.9	30.69	447.96	3090	24.4733	25.697	0.0396726	538	0	7.4	22	12.4335	Electricity Generation	7.17482e+09	S O PURDOM	FL	0.0677184	1.05062	11.4012	9.15622	6.98613	22.5262	34.8817	1186.12	83.2776	173.978	-386.747	31.9843	60.0877	78.9191	36.1368	47.5958	201.217	233.619	7.48909	1.67182	0.537587	1.20008	4.5371e+08	16.5063	0.245214	0.280436	7.68724	1.71605	0.555105	0.123918	0.851849	0.190162	2.43687e+08
1538	-99.9	29.19	410.99	9799.28	25.0318	26.2834	0.0368097	230	3.5	7.8	28.3	71.0547	Electricity Generation	9.0537e+09	W A PARISH	TX	0.230565	4.52504	11.6761	9.16012	6.99606	22.5301	34.8916	1215	85.3628	178.285	-382.459	36.2916	62.0219	79.7422	36.4643	47.9605	205.525	237.927	9.43888	2.29662	2.29791	5.59116	4.20969e+08	22.4218	0.259069	0.296281	9.64505	2.34678	2.36169	0.574633	3.54633	0.862875	2.25872e+08
1494	-96.6	29.31	492.495	10318	25.3877	26.6571	0.0449301	2000	0	4.83	0	3.28364	Stationary Combustion	8.1415e+09	NATURAL GAS PIPELINE COMPANY OF AMERICA COMPRESSOR STATION 342	LA	0.243155	0.860538	11.5396	9.16971	6.99037	22.5397	34.8859	1162.77	86.8151	178.927	-381.823	36.9337	63.1502	91.0728	40.0078	52.9358	206.167	238.569	8.55053	1.73617	2.10734	4.27891	5.13837e+08	16.6405	0.300695	0.343885	8.80875	1.7886	2.17391	0.441407	2.44894	0.497252	2.75748e+08
47	-119.8	35.44	532.86	7807	24.4908	25.7153	0.0465853	2000	0	8	0	6.02984	Petroleum and Natural Gas Systems	1.18263e+10	EPNG Station 6210 Bondad	CO	0.182209	100	11.5652	9.18662	7.00469	22.5566	34.9002	1247.64	94.2303	192.487	-368.212	50.4937	69.0047	97.7114	38.9546	55.8411	219.727	252.129	12.308	2.3098	5.64461	10.593	5.32767e+08	23.102	0.345169	0.394748	12.5694	2.35886	6.14746	1.15367	39.2884	7.37311	2.85931e+08
1537	-98.3	29.19	466.7	4220	25.2558	26.5187	0.0426448	2000	0	6.7	36	5.84545	Electricity Generation	9.03195e+09	CLEAR LAKE COGENERATION	TX	0.0951456	2.1097	11.4808	9.18946	7.01389	22.5595	34.9094	1361.06	97.566	201.311	-359.435	59.3172	72.168	92.3008	40.381	53.4741	228.55	260.952	9.36147	2.00588	0.956404	2.04929	4.87701e+08	19.1951	0.323205	0.369629	9.57375	2.05137	0.985436	0.21115	1.62584	0.34837	2.61897e+08
935	-96.1	30.31	418.84	2565	24.6979	25.9327	0.0374863	528	0	0	0	9.71946	Pulp and Paper Manufacturing	6.93071e+09	GEORGIA-PACIFIC PORT HUDSON OPERATIONS	LA	0.0549757	1.59298	11.7702	9.23049	7.06487	22.6005	34.9604	1148.33	79.786	167.446	-393.287	25.4523	57.1812	74.9958	34.9203	45.8749	194.685	227.087	7.229	1.72595	0.441027	1.05297	4.28707e+08	16.8623	0.22445	0.256689	7.41615	1.77064	0.457191	0.109156	0.882351	0.210665	2.3027e+08
967	-94.3	30.31	511.24	18300	24.7908	26.0304	0.0451353	2000	0	7.6	0	6.09963	Electricity Generation	7.16736e+09	CHEVRON COGENERATING STATION	MS	0.436893	0.406058	11.5755	9.25428	7.07466	22.6243	34.9702	1374.35	98.2622	203.453	-357.283	61.4591	73.0847	92.4952	40.4743	53.5577	230.692	263.094	7.70168	1.50647	3.37819	6.60784	5.16183e+08	14.9204	0.322204	0.368484	7.9703	1.55901	3.49733	0.684087	3.6276	0.709568	2.76792e+08
1395	-100.4	29.31	494.02	2592	24.1844	25.3937	0.0433071	1390	0	6.7	34	114.57	Electricity Generation	1.15558e+10	W A PARISH	TX	0.0556311	10.188	11.5568	9.25937	7.08265	22.6294	34.9782	1340.64	95.8844	197.927	-362.814	55.9335	70.6491	90.4007	39.7804	52.6392	225.166	257.568	11.895	2.4078	0.98394	1.9917	4.95276e+08	24.017	0.318068	0.363754	12.111	2.45151	1.03933	0.210382	4.18043	0.846206	2.66003e+08
611	-92	31.19	511.01	3537.47	24.6977	25.9326	0.04568	220	0.1	7	0	16.833	Stationary Combustion	7.25757e+09	XTO - TEAGUE TOWNSITE STATION	TX	0.0785793	0.320413	11.6155	9.27947	7.09888	22.6495	34.9944	961.495	70.6229	147.46	-413.265	5.46601	49.2458	65.768	31.9117	41.8222	174.699	207.101	7.61942	1.49105	0.609418	1.19257	5.22413e+08	14.5851	0.213349	0.243993	7.84754	1.53569	0.628782	0.123047	0.732983	0.143438	2.80582e+08
101	-112.4	33.69	427.38	3070	24.0071	25.2075	0.0370091	240	0	0	0	23.6839	Electricity Generation	1.21878e+10	Blythe Energy	CA	0.067233	100	11.7875	9.29117	7.12661	22.6612	35.0221	1198.1	84.3436	175.861	-384.86	33.8678	60.9033	80.2254	36.4533	48.1686	203.101	235.503	12.4722	2.9183	3.54121	8.28585	4.23249e+08	29.4678	0.260018	0.297366	12.6571	2.96155	3.91706	0.916527	30.2608	7.08052	2.27286e+08
2297	-99.8	28.06	518.76	13596	27.0515	28.4041	0.0499482	1635	0	7.5	0	3.30559	Petroleum and Natural Gas Systems	1.19258e+10	PRAIRIE LEA CMP STN	TX	0.322718	10.3795	11.6957	9.3216	7.13491	22.6916	35.0304	1230.12	92.4345	166.255	-394.504	24.2613	67.7985	96.0168	41.6447	55.1078	193.494	225.896	12.5858	2.42613	4.44027	8.5594	5.71226e+08	22.033	0.333974	0.381944	12.869	2.48072	4.58199	0.883259	8.26739	1.59368	3.06339e+08
1229	-97.9	29.69	449.68	9220	24.8793	26.1232	0.0401478	983	0	0	0	1.30605	Electricity Generation	8.36259e+09	SABINE	TX	0.216505	1.09669	11.4943	9.32724	7.15628	22.6972	35.0518	1271.31	90.0629	187.274	-373.465	45.2808	65.9781	84.5078	37.5785	50.0519	214.514	246.916	8.72161	1.93951	1.92042	4.27064	4.59144e+08	18.9954	0.282109	0.32263	8.94886	1.99005	1.97393	0.438962	2.28714	0.508615	2.46408e+08
1439	-98.6	29.31	414.81	3709.69	25.2071	26.4675	0.0378629	49	3.8	6.6	22.4	14.3414	Stationary Combustion	7.91571e+09	KANEKA NORTH AMERICA LLC	TX	0.0827594	3.05015	11.8567	9.35453	7.18812	22.7245	35.0837	1145.81	79.8883	167.542	-393.202	25.5479	57.3037	75.5775	33.3348	46.1321	194.781	227.183	8.21068	1.97938	0.763848	1.84144	4.33013e+08	18.9617	0.228678	0.261525	8.39928	2.02485	0.790803	0.190642	1.61292	0.388833	2.32545e+08
2953	-99.3	27.19	525.16	23231	28.0969	29.5018	0.0515789	2000	0	6.68	0	29.1637	Stationary Combustion	1.31645e+10	J K SPRUCE	TX	0.556578	6.35043	11.7301	9.35728	7.16854	22.7273	35.0641	1603.01	117.041	174.233	-386.542	32.239	88.8423	110.411	46.3164	61.4297	201.472	233.874	14.271	2.71745	8.18209	15.5802	5.89875e+08	24.1932	0.426442	0.487695	14.5699	2.77438	8.3799	1.59568	10.7048	2.0384	3.15869e+08
59	-114.6	33.94	448.49	2490	23.8121	25.0027	0.0386014	240	0	0	0	55.5281	Electricity Generation	1.20732e+10	JEFFERIES	SC	0.0531553	100	11.8826	9.35733	7.18938	22.7273	35.0849	1193.2	83.9038	175.037	-385.683	33.0437	60.5327	79.0784	36.3287	47.6648	202.277	234.679	12.3745	2.75914	3.47672	7.75204	4.4146e+08	28.0309	0.256927	0.293831	12.5674	2.80217	3.8664	0.862091	31.3467	6.98938	2.37092e+08
1068	-93.1	30.06	491.09	23700	25.7507	27.0383	0.0449759	2000	0	7.99	0	8.2988	Stationary Combustion	6.04744e+09	TEBONE FRACTIONATOR	LA	0.567961	0.373328	11.6203	9.36528	7.18595	22.7353	35.0815	1166.54	86.8104	179.538	-381.207	37.5443	63.4058	90.9933	40.0345	52.8999	206.777	239.179	6.63862	1.35181	3.78274	7.70274	5.1436e+08	12.9066	0.297519	0.340253	6.91598	1.40829	3.94189	0.802682	4.06119	0.826975	2.75703e+08
1350	-99.3	29.44	454.63	2829	24.2652	25.4784	0.039983	1009	0	7.6	0	49.0061	Electricity Generation	9.09878e+09	W A PARISH	TX	0.0613835	4.10697	11.5294	9.36609	7.19539	22.7361	35.0909	1261.15	89.3665	185.588	-375.152	43.5945	65.2294	84.4157	37.8179	50.0116	212.827	245.229	9.41306	2.07049	0.697724	1.53471	4.5726e+08	20.5858	0.280707	0.321027	9.61244	2.11434	0.726108	0.159714	1.89516	0.416856	2.45588e+08
946	-95.3	30.31	471.12	26501	24.7698	26.0083	0.0410076	240	0	5.4	0	9.66423	Stationary Combustion	7.33623e+09	ADDIS CARBON BLACK PLANT	LA	0.635947	0.726167	11.5206	9.36659	7.19416	22.7366	35.0897	1121.58	82.4805	171.142	-389.59	29.148	59.549	84.9644	37.9416	50.2508	198.381	230.783	8.02087	1.70251	5.12259	10.8732	4.68978e+08	17.1029	0.27055	0.309411	8.26703	1.75476	5.282	1.12116	5.49345	1.16604	2.51228e+08
648	-97.3	31.19	491.94	5431	23.8374	25.0293	0.0421548	700	0	0	0	2.8642	Stationary Combustion	9.40749e+09	TEMPLE INLAND BOGALUSA MILL	LA	0.124539	2.61663	11.6037	9.41297	7.23828	22.783	35.1338	1230.6	87.0298	181.061	-379.649	39.0678	63.1674	73.2717	37.08	45.1139	208.301	240.703	9.72739	1.97735	1.29199	2.62631	4.82098e+08	20.1772	0.267368	0.305772	10.0202	2.03688	1.33927	0.272243	2.12429	0.43182	2.58842e+08
2375	-97.4	28.06	431.136	36000	27.6416	29.0236	0.0415981	936	0	7.9	0	23.0271	Petroleum and Natural Gas Systems	8.0574e+09	COPANO PROCESSING HOUSTON CENTRAL GAS PLT	TX	0.866505	3.3567	11.5522	9.41878	7.24532	22.7888	35.1409	1224.05	91.544	164	-396.776	22.0062	67.3601	89.1132	41.3519	52.0801	191.239	223.641	8.93442	2.0723	7.84369	18.1931	4.75731e+08	18.7804	0.325556	0.372318	9.18502	2.13043	8.07417	1.87277	9.06484	2.10255	2.54632e+08
1486	-98.6	29.31	434.89	3709.69	25.2071	26.4675	0.0396957	1767	0	4.4	36.1	3.94218	Stationary Combustion	8.2989e+09	CHANNEL ENERGY CENTER	TX	0.0827594	3.05015	11.5636	9.45089	7.28076	22.8209	35.1763	1330.05	95.0285	196.46	-364.284	54.4661	70.0296	91.4031	44.2552	53.0797	223.699	256.101	8.60814	1.97938	0.800824	1.84144	4.53975e+08	18.9617	0.309613	0.354085	8.80587	2.02485	0.829084	0.190642	1.691	0.388833	2.43802e+08
1701	-98.8	28.94	585.601	24602	25.8806	27.1746	0.0530578	2000	0	6.65	0	27.179	Electricity Generation	1.15907e+10	W A PARISH	TX	0.589854	11.0304	11.7941	9.45205	7.26144	22.8221	35.157	1543.81	112.166	229.895	-330.857	87.9015	84.7588	105.963	44.6981	59.4732	257.134	289.536	12.6282	2.15646	7.8762	13.4498	6.06788e+08	20.8116	0.398476	0.455711	12.9407	2.20982	8.11668	1.38604	12.2713	2.09551	3.24965e+08
1152	-103.3	29.69	415.53	3599.47	24.1436	25.3508	0.0362391	213	2.8	6.9	28.9	79.2078	Stationary Combustion	1.07962e+10	ONSHORE TREATING FACILITY	AL	0.0800841	100	11.8579	9.47112	7.30827	22.8411	35.2038	999.067	73.6429	153.187	-407.547	11.1932	51.776	73.1571	33.2641	45.0679	180.426	212.828	11.1813	2.69084	3.54188	8.52375	4.14444e+08	26.9789	0.238299	0.272527	11.3593	2.73368	3.91185	0.941411	29.7063	7.149	2.22547e+08
172	-111.8	33.56	440.04	2040	24.2237	25.4349	0.038557	1000	9.5	7.4	24	12.503	Electricity Generation	1.17388e+10	WASHINGTON COUNTY POWER, LLC	GA	0.042233	100	11.9483	9.47708	7.30923	22.8471	35.2048	1304.84	93.1966	192.62	-368.102	50.6264	68.281	87.8393	39.0193	51.5112	219.859	252.261	12.043	2.73678	3.32431	7.55457	4.40952e+08	27.3113	0.306089	0.350054	12.2357	2.78059	3.71169	0.843489	31.1625	7.08174	2.36838e+08
669	-95.1	31.06	410.2	2442.17	24.1891	25.3986	0.0359036	36	4.3	7.2	19.8	33.7881	Stationary Combustion	6.43882e+09	BUCKEYE FLORIDA	FL	0.0519944	0.769087	11.8724	9.51513	7.35303	22.8851	35.2486	1140.3	79.5481	166.797	-393.921	24.8032	56.9041	75.1844	34.9353	45.9549	194.036	226.438	6.72569	1.63961	0.369863	0.901665	4.10606e+08	16.3799	0.225287	0.257647	6.90528	1.68339	0.381918	0.0931052	0.578521	0.141034	2.20552e+08
68	-115.3	33.81	411.08	2330	23.8333	25.025	0.0353978	240	0	0	0	49.1694	Electricity Generation	1.25014e+10	Springerville Generating Station	AZ	0.0492718	100	11.9091	9.52358	7.36266	22.8936	35.2582	1202.5	84.6937	176.507	-384.214	34.5132	61.1812	80.2392	36.4812	48.1745	203.746	236.148	12.7769	3.10812	3.21454	7.81973	4.04822e+08	31.5616	0.263631	0.301498	12.9538	3.15116	3.57115	0.868724	28.7705	6.99876	2.17413e+08
173	-112.6	33.44	491.43	3240	23.9041	25.0993	0.042372	1001	0	0	0	20.1101	Electricity Generation	1.20688e+10	Comanche (8059)	OK	0.0713592	100	11.6729	9.527	7.35191	22.897	35.2474	1298.64	92.6781	191.676	-369.038	49.6826	67.8456	77.3427	38.8243	46.9019	218.916	251.317	12.3966	2.52256	3.97892	8.0966	4.84582e+08	25.5821	0.301864	0.345222	12.6084	2.56565	4.41021	0.897423	34.5722	7.03502	2.60229e+08
840	-90.9	30.56	453.22	20406	24.8623	26.1054	0.0400919	2000	0	7	0	22.3697	Titanium Dioxide Production	5.96553e+09	TRONOX LLC	MS	0.48801	0.295518	11.5897	9.54915	7.37838	22.9191	35.2739	1207.33	89.3486	184.55	-376.184	42.5567	65.4538	91.8273	40.3248	53.2643	211.79	244.192	6.45699	1.42469	3.15973	6.97172	4.58505e+08	14.0827	0.305929	0.349872	6.69872	1.47803	3.27884	0.723453	3.36304	0.742031	2.45822e+08
664	-96.4	31.06	414.43	18077	24.0649	25.2681	0.0352448	240	0	0	0	7.62923	Petroleum and Natural Gas Systems	7.20524e+09	MIVIDA TREATER PLANT	TX	0.431481	2.16812	11.9227	9.6206	7.46019	22.9906	35.3557	1057.58	78.3545	162.591	-398.124	20.5978	55.8861	72.2435	33.9789	44.6634	189.831	222.233	7.68726	1.8549	3.37271	8.13817	4.03072e+08	19.0717	0.256669	0.293537	7.89219	1.90435	3.46853	0.836939	4.01156	0.96797	2.16092e+08
70	-116.1	33.56	424.82	2420	24.2592	25.4721	0.037226	240	0	0	0	39.5472	Electricity Generation	1.22162e+10	Carson Cogeneration Company	CA	0.0514563	100	12.0165	9.66907	7.50402	23.0391	35.3996	1195.6	84.1261	175.443	-385.278	33.4493	60.7148	79.4561	36.3975	47.8307	202.682	235.084	12.5065	2.94396	3.36205	7.91404	4.2573e+08	29.3766	0.258951	0.296146	12.6926	2.98776	3.73751	0.879786	30.2386	7.11797	2.28644e+08
1273	-100.9	29.56	444.34	2266	24.2459	25.4582	0.0390365	240	0	0	0	54.6222	Petroleum and Natural Gas Systems	1.05228e+10	PLAQUEMINE GAS PLANT	LA	0.0477184	100	12.0336	9.67375	7.50492	23.0437	35.4005	990.591	72.9868	151.91	-408.823	9.9165	51.2158	67.9465	32.5828	42.7801	179.15	211.551	10.8305	2.43743	3.36754	7.57873	4.46436e+08	24.2599	0.232997	0.266464	11.0254	2.48129	3.76077	0.846372	31.5529	7.10106	2.39783e+08
929	-97.5	30.44	412.46	3175	24.4921	25.7167	0.0365085	20	0	0	0	8.56034	Pulp and Paper Manufacturing	8.07175e+09	MEADWESTVACO EVADALE	TX	0.0697816	3.0939	11.9972	9.68926	7.52579	23.0593	35.4213	1156.89	80.5331	168.839	-391.886	26.8452	57.7734	75.6059	35.0201	46.1413	196.078	228.48	8.35823	2.02643	0.665737	1.61406	4.17524e+08	20.0185	0.230506	0.263615	8.54054	2.07063	0.689562	0.167183	1.49368	0.362139	2.24238e+08
1265	-100.8	29.56	507.58	2670	23.8875	25.0818	0.0439099	240	0	0	0	57.9994	Petroleum and Natural Gas Systems	1.19448e+10	PLAQUEMINE GAS PLANT	LA	0.0575243	100	11.8485	9.71211	7.53437	23.0821	35.4299	992.99	73.1784	152.279	-408.454	10.2856	51.378	72.8629	32.6564	44.9385	179.519	211.92	12.2883	2.42095	3.91349	7.71008	5.0217e+08	24.4703	0.23417	0.267805	12.5074	2.46412	4.35774	0.858532	35.6176	7.01713	2.69701e+08
663	-97.5	31.06	494.93	2939	23.8117	25.0023	0.0425419	956	0	8	0	13.3784	Stationary Combustion	9.75554e+09	TEMPLE INLAND BOGALUSA MILL	LA	0.0640534	2.61663	11.7978	9.71548	7.54008	23.0855	35.4356	1255.85	89.1169	184.991	-375.721	42.9975	64.8992	84.4502	38.1865	50.0217	212.23	244.632	10.0905	2.03876	0.72762	1.47015	4.86525e+08	20.7399	0.279385	0.319514	10.3033	2.08176	0.752194	0.15198	1.54468	0.312099	2.61302e+08
695	-97.4	30.94	410.17	3121	24.006	25.2063	0.0355561	222	0	8.4	19	13.8696	Stationary Combustion	7.92787e+09	TEMPLE INLAND BOGALUSA MILL	LA	0.0684709	2.61663	12.0461	9.73376	7.57247	23.1038	35.468	1168.74	81.9234	171.304	-389.413	29.3099	58.8866	77.4763	35.7118	46.9608	198.543	230.945	8.20727	2.00094	0.629901	1.53571	4.06632e+08	20.1835	0.240516	0.275063	8.38502	2.04428	0.651218	0.158768	1.31355	0.320246	2.18389e+08
[truncated: 25 more rows]
[truncated: 6 more columns]

## Sheet: Notes 2
When r or rs < -0.9, the cell will be highlighted with golden color - indicating there is negative correlation
When r or rs > 0.9, the cell will be highlighted with red color - indicating there is positive correlation

## Sheet: Pond area (ha)
	Pearson Correlation	Pearson P-value	Spearman Correlation	Spearman P-value
TDS	-0.0290008	0.364459	-0.0888575	0.00537533
[truncated: 45 more rows]

## Sheet: TDS
	Pearson Correlation	Pearson P-value	Spearman Correlation	Spearman P-value
[truncated: 46 more rows]

[truncated: 43 more sheets: Biomass_pro, Longterm_annual_biomass, Biomass_yield, Well_depth (ft), DO (mgL), pH of saline groundwater, Water temperature (oC), CO2 source distance, Evaporation loss (Lyr), Correction_factor, CF_FW, TEA_fuel, TEA_whey_soy, TEA_chicken, Biorefinery_TEA_whey_soy, Biorefinery_TEA_chicken, GHG_biomass, GHG_fuel, GHG_disp_soy, GHG_disp_whey …]
